# Supplementary material for: Tight nanoscale clustering of Fcγ receptors using DNA origami promotes phagocytosis
Source: eLife. 2021 Jun 3;10:e68311. doi: 10.7554/eLife.68311 (PMC8175083; doi:10.7554/eLife.68311)
Supplement: Figure 2—figure supplement 2—source data 1. [file elife-68311-fig2-figsupp2-data1.xlsx]

## Sheet: Syk-Repeat 1
Intensity at 72-ligand origami (co-plated with 36-ligand origami	Intensity at 36-ligand origami	Intensity at 72-ligand origami (co-plated with 16-ligand origami	Intensity at 16-ligand origami	Intensity at 72-ligand origami (co-plated with 8-ligand origami	Intensity at 8-ligand origami	Intensity at 72-ligand origami (co-plated with 4-ligand origami	Intensity at 4-ligand origami	Intensity at 72-ligand origami (co-plated with 2-ligand origami	Intensity at 2-ligand origami	Intensity at 72-ligand origami (co-plated with 0-ligand origami	Intensity at 0-ligand origami
488.3	14.2	-0.2	13.3	83.7	-5	1.5	1.8	-2.1	6.2	95.8	3.5
-1.4	165.8	158.7	8	99.7	0.5	-12.8	3.2	110.2	-2.3	75.8	58.1
-4.9	-14	-14.2	15.7	39.2	2.3	188.9	-7.2	69.1	-5.4	-1.5	-1.9
351.2	269.5	0.3	14	43	0.4	31.3	5.5	-6	-2.5	70.7	-5.9
336.9	141.3	244.2	-5.4	57.7	25.4	-8.3	8.2	6.2	27.5	175.4	-0.8
335.5	137.5	3.2	72.1	2.2	-2.2	88.4	-7.4	119.5	-1.8	63.8	-3.5
256.5	159.9	148.3	-1.5	113.8	1.7	-6.1	9.7	-5.8	-2.3	110.9	-1.8
-4.1	132.4	238.8	-2.2	62.2	-12.8	149.8	0.5	9.2	-2.6	160.9	0.9
244.8	14.1	193.2	0.6	-3.5	-7.2	76.2	-7.1	-6.7	0	87.9	7.2
220.8	-5	171.8	-11.8	72.7	9.6	12.5	-12.3	71	-10.6	117.1	-6.8
213.7	190.5	216.6	-2.3	58	-5.2	218.5	1.6	20.3	2.8	2.2	6.5
273.9	124.3	147.3	1.8	154.2	5.3	245.2	-6.9	-3.9	3.1	111.1	4.7
71.5	216.3	89.8	24	96.6	8.6	117.4	64.5	30.2	1.3	156	3.8
6.1	20.5	136.8	-20	116.2	1.5	86	-0.2	3.5	2.4	107.6	-4.1
11.3	147.5	217.2	73.6	106.9	0.8	212.2	59.8	130.8	3.8	127.4	3.3
4.1	4.6	214.9	136.3	13	-1.7	235.5		63.8	-1.1	54.9	-10.4
375	20.2	127	28.6	98.6	0.6	206.2	3.4	10.8	-4.7	87	10.2
557.9	126.5	92.2	-13	105	6.2	268.4	0.4	-2.4	0.2	115	21.6
353.5	212.7	11.6	-74.1	17.2	6.2	9.5	1.4	1.2	-0.3	171.1	1.8
429.7	100.5	3.5	-0.7	3.5	0.2	1.7	4.9	2.7	1.2	65.9	28.7
343.2	41.3	226.3	-1	8.8		317.2	12.5	103.8	1.1	89.5
95	84.5	129.9	-12.1	-1.1	9.2	343.2	1.7	-4	1.6	107.5	7
244.3	283.6	242.3	-0.2	239.2	3.6	2.2	1.1	-8.4	-7.4		1.1
141.7	13.2	651.3	-0.8	92.8	2.8	6.1	21.9	-9.6	-5.1	-7.4	1.1
259.5	254.5	134.6	23.2	3.1	-5.5		29.7	263.8	1.6	-3.2	93.2
478.8	198.5	90.2	-28.8	3.5	-7.9	52.6	-8.1	65.5	3.7	-3.6	0.6
499.4	108.9	156.8	-11.5	-16.5	30.5	2.3	1.2	8.3	-1.8	-1.7	-3.3
-10.2	81.4	157.2	388.6	72.3	6	-0.2	2.5	57.2	-0.6	-5.8	3.1
564.5	85.8	139.5	118.8	-12.2	6	84.8	-2.3	71.5	2	206.9	-15
-34	88.5	154.5	36.4	56.5	148.2	136.1	3.6	104.6	2.4	202.1	-3.3
274.1	-28.2	321.8	59.3	107.2	57.5	38.9	5	88.7	10	-2.4	-3.2
373.9	74.2	339.8	69.1	-6.4	0.2	101.7	2.4	41.8	-4.1	-1.9	16.5
376.8	217.3	249.9	-22.9		9.6	0.5	0.8	92	-4.5	266.8	2.1
273.3	229.2	102.7	-17.8	161.1	0	13.5	-1.6	121.8	1.6	2.2	0.2
213.8	140.5	99.9	-25.8	83.2	-1.7	52.5	5.7	70.4	7.5	136.9	1.3
188.9	210.8	64.4	43.1	171.3	-6.2	122.2	1	150.1	-6	184	6
0.6	334.6	332.6	5.7	67.5	1.5	94.2	10.1	-3.2	13.7	96.3	18.3
556.7	181.3	175.5	38.8	159.8	1.7	146.4	-1.7	13.6	-0.7	86.8	-5.7
-6.7	23.5	191.5	-14.8	46.3	13.8	196.7	-3.7	96.5	-1.2	72.3	1
122.2	133.1	129.2	-2.9	142.3		59.1	-12.5	42.3	1.3	204.5	2.3
270.2	605	178.8	65.5	146.5	10.2	96.1	16.8	70.2	5.2	29.5	-6.4
347.8	221.1	254.5	23.2	74.8	-5.1	48.8	-3.1	54.9	-3.4	116.5	-0.2
315.1	191	116.3	-38.6	83.5	-11.2	-10.9	9.9	65.8	-2.6	9.1	0.8
-19.8	138	212.3	16	16.5	89.8	-7.4	2.9	55.8	37.3	83.4	6.7
504.5	-3.3	181	15.8	39.1	54.5	53.3	63.7	2.1	9.9	-5	-1.4
-0.4	115.7	116.3	9.8	223.9	14.9	70.7	14.9	89.4	5.4	80.8	1.6
-5.7	105.2	-3.2	-11.5	-6.2	-5.4	-0.3	113.4	5.5	-12.9	38.6	5.1
455.8	30.3	212.2	37.2	59.8	2	109.4	5	84	36.3	55.5	81.8
2.2	176.6	248.4	3.8	84.1	11.4	185	-8.7	-3	2.8	7.3	-5
15	327.6	78.2	9.1	-3	1.9	134.1	4.9	3.2	-5.8	108.3	2.2
-14.8	-2.5	8.6	51.8	239.6	-0.2	48.5	76.4	-5.2	54.7	-0.1	0.4
204.3	-1.1	9.8	-10.6	159.5	-4.6	15.2	0.5	1.2	14.7	112.5	-0.9
-12.6	253	25.8	-43	-1	6.6	-8	-5.1	66.9	6.7	151.9	-0.3
4.8	206.8	26.9	23.9	237.6	-1.4	80.3	10.2	30.3	-11.9	188.9	-1.2
284.5	-3.2	208.7	-29.3	-3.2		61.5	14.4	47.7	-3.5	135.8	2.2
-5.5	234	-3.8	26.6	61.3	10.9	-1.9	10.7	88.6	-2	113.4	-0.2
281.7	180.7	-0.5	4		-8.8	39	4.7	124.6	-5.1	50	78.2
11	139.6	184.5	-40.2	148.4	-5.5	-8.8	4.4	64.5	-5.4	150.8	1.2
337.6	415.2	106.9	38.1	158.5	-1.6	43.8	-1	-0.7	-2.8	98	-4.4
428.7	249.8	161.6	-5	107.5	-1.4	-1.9	21.7	102	-5	118.1	2.1
274.3	264.2	229.2	55.3	89.7	76.6	44.1	-2.4	25.5	-6.4	-3.5	-4.4
421.2	-5	-17.5	10.7	-3.1	43.6	120.5	4.3	53.3	-7.9	73.1	-0.2
276.6	3.3	-7.8	98.5	96.9	-0.3	4.9	7.8	1.4		76.8	0
	-18.8	168.8	14.8	95.9	13.7	85.5	4.1	68.2	-2.2	210.2	-5.6
-1.6	188.3		100.2	85.8	-3	46.8	-5.6	54	-1.6	210.2	5
6.7	301.5	106.9	23.5	20.7	5.9	175.2	7.9	-4.8	2	155	-1.4
297.6	331.8	183.2	-13.2	31.5	1.8	35.8	51.6	27.8	-13.1	-1.6	-1
193.4	1.8	8.2	2.8	121.8	4.8	104.7	12.5	53.2	-2.4	35.6	-4
-2.4	6.8	56.2	33.5	68	-2	186.3	2.8	1.4	-26.9	80.3	4.8
9.7	-1	96.5	143.5	82	2.2	-12.5	-0.1	2.3	104.4	7.8	15.3
	0	74.1	-44.6	55.8	-2.5	40.9	-4.4	26.2	-5.6	30	2.9
516.8	71.4	104.1	12.3		2	40.5	0.2	6.9	45.6	59.4	39.9
3.3	5.1	77.8	3.7	110.8	5.8	-0.2	-4.8	53.8	46.3	168	1.5
7.2	80.8	58.9	15.5	122.8	-4.7	145.5	2.7	1.6	10.8	79.5	0.3
-6.5	0	27.6	-7.8	86.4		216.1	-10.5	146.4	119	-0.2	-1.3
-2.8	18.3	193.6	-19.9	63.5	0.2		-1	57.3	-6.4	-1.3	1.1
237.5	142.3	81.1	-12.6	-3.3	-2.4	40.4	-3.6	35	-4.6	29.2	3.8
-5.9	-10.8	17	-8.5	0.4	-0.1	121.5	68.3	72	24.8	188.8	-2.7
352.2	11.2	67.2	2.8	-5.8	-0.2	103.5	1.2	17.7		52.8	-1.4
262.7	249.7	95.5	54	73.7	6.1	80.7	-2	104.5	-2.3	99.7	0.8
202.6	103.8	149.5	-13.2	69.7	-4.5	129.1	3		-0.6	73.8	-2
141.5	119.9	254.5	-17.7	58.7	0.8	5.8	1.7	194	-0.3	45.9	2.7
171.7	135.3	97.7	48	12.4	0.3	85.1	-0.1	121.6	5.2	33.8	0.7
271.8	97.2	99.4	-20.3	23	6.6	10.7	10.1	31.8	0.8	62.8	-1.5
122.2	170.2	68.8	-0.5	83.3	12	118.6	6.9	216	2	31.1	2
6.4	-20.1	28.2	71.2	55	0.9	60.7		-5.9	4.3	70.1	-8.8
5.5	-2.9	37.2	-4.4	57.7	14.2	-2.3	-1.8	142.6	0.1	42.5
345.6	107.1	14.2	-34.5	41.2	-1	50.1	4.7	216.5	0.6	18.8	0.8
477.6	212.6	38.2	59.2	5.5	3.2	1.6	3.5	14.2	-2.9	7.5	-6.5
340.8	45.4	49.7	6.1	3.8	18.7	198.2	-0.5	242.8	3.1	47.5	3.3
261.1	104.9	96.5	9.4		23.1	181.6	99.3	62.4	-3.2	60.4	-5.3
498.2	15.3	54.5	-11.8	104.5	7.6		5	112.2	-2	-0.2	36.1
85	90.8	52.5	-7	6.2	10.8	120.2	5.1	99.2	-0.7	8.6	-2.1
203.8	57.6	86.5	1.3	-8.2	22.1	5.8	-1.1	114.8	-0.5	49.5	-4.2
103.2	71.2	79.1	-1.8	1.8	26	37.7	-0.2	79.7	-1.1	6.8	2.7
227.9	311.4	120.8	0	29.6	4.8	5.1	7	279.1	-3.3	1.8	3.8
441.4	160.8		237.9	-2.8	-4.6	-3.2	9.8	199	8.8		2.9
382.4	247.9	5.8	-2.1	43.2	1.6	30.9	-2.1	5.1	-0.8	2.5
547.5	108.5	4	30.2	6.5	7.4	-10.8	-0.5	96.5	-4	43.8	4
-82.8	82.5	5.1	-0.6	28	-3	-4.1		166.8	1.7	-1.8	-3.6
341.4	40	2.2	3.8	6.3	24	49.5	4.2	-5.2	2	2.2	-0.9
324.6	90.6	7.2	0.9	-1.3	-4.5	62.9	-0.9	107.7	-0.5	0.4	-3.7
297.9	-15.4	2.6	-0.6	43.1	12.6	26.6	-2.2	24.5	-1	65.1	19.7
225.2	104.4	3.5	8.2	15.6	24.5	7.5	1.1		-1.4	4.2	12.4
236.7	138.5	7.1	38.3	40.8	15.2	88.7	-3.1	2.2	-2.2	1.2	-3.6
195.3	129.5	3.4	-3.7	-3.3	-3.9	3.6	8.5	14.8	3.7	43.6	-2.3
475.6	295.2	10.5	1.7	13.6	28.3	29.1	0.9	61.5	1	3.7	4.3
-25.8	353.3	4.8	12.2	33.3	13	28	6.9	25.5	-4.8	64.5	2.3
248	214.3	30.1	-3.9	46.8	38.7	-0.3	1.8	0.8	26.9	295	-1
384.2	11.8	24.2	1	75.9	12	79.8	-3.7	70.5	5.4	67.2	0.5
168.3	175.8	-3.5	26.2	60	3	16.2	-1.2	5.2	1.5	141.3	-3.7
	155.9	5.2	5.1	-4.7	1.1	25.3	0.2	20.6	1.5	62.5	4.6
448.9	670.5	5	36	48.4	-5	-5.5	-2	33.2	-9	59.2	-9.7
2.4	213.2	14.2	-10.7	70.5	-0.3	8.1	-3.4	-0.9	5.8	26.4	-1.1
5.4	178.5	2.3	-1.6	31.4	3.4	37.2	3.9	92.2	-2.4	304	19.3
-18.5	65	-8.9	6.5	8.2	14.7	66.5	-0.8	68.2	-9	89.3	0.1
136.5	107.5	-6.9	81.8	115.4	9.6	48.2	4.7	-6	-1.4	71.2	0
-5.6	51.2	-10.5	25	51.6	8.1	37.4	0.4	8.5	6.1	138.7	-0.7
18.8	114.2	5.4	-2.7	58.6	18.3	24.8	5.2	-2.1	-4.4	117.1	-0.3
351.8	180.4	1.4	-4.1	39.9	-2.3	13.8	0.8	14.4	3.5	114.8	-1.7
-26.3	-11.5	10.6	8	62.5	0.4	8.4	4	-0.4	-7	62.4	3.3
314.7	297.4	14.7	3.2	9.4	2	35.2	-0.6	-0.5	7.9	243	-1
26.8	213.8	-5.8	2.2	33.5	9.6	36.7	0.8	27.2	10.5	161.8	1.2
344.1	236.8	8.5	-9.6	70.4	16.2	-5.4	4.3	22.6	-2.8	311.9	3.5
366.7	215.8	3.2	-4.1	32.7	-5.1	121.5	2.9	8.4	11.4	104.2
341	164.3	16	16.7	88.5	-5.6	39.2	4	-1	-4.8	233.8	-1.1
356.8	239.3	4	-4.2	65.2	0.9	-8.7	4.8	-0.3		37.9	1.9
309.5	209.4	7.6	4	6.1	8.4	42.2	9.5	37.4	13.3	92.1	-5.6
	261.8	28.2	4.8	58	14.9	1.8	-2.8	34	6.6	86	-1.2
22.8	419.7	-0.7	28	60	5.5	51.9	23.2	53	33.7	74.4	-0.1
-2	-31.6	39.6	3.8	60.2	1.8	55.2	-1.4	20.8	16.6	-1.8	2.8
5.3	131.7	43.3	4.9	14.5	1.9	51.7	0.6	20.3	-5.1	89.4	4.5
-3.2	233.5	10.2	0	-4.6	-1.4	16.8	2.5	6.7	-0.8	124.5	-2.8
4.2	-2.5	-2.8	-2.2	-4.5	-1.4	4.8	-3.9	-0.3		75.3	-1.2
45.7	333.5	10.6	-2.3	3.7	11.5	1.2	2.3	25.1	4.7	76.2	2.5
0.5	-2.3	3.2	3.7	-1.7	60.1	8.5	-1.4	9.4	4.1	187.4	3.3
62.7	-2.7	-0.7	-1.4	68.5	11.9	3.2	-0.8	12.5	-1.2	124.3	0.2
47.8	-6.1	1	9.7	37.8	6	52.2	7.1	12.3	1.3	151.9	65.8
81	0	18.4	2.9	8.3	10.1	-0.6	5.4	29.5	3.9	181.7	44.6
-1.6	2.1	3	1.4	106.4	7.7	23.2	2.6	11.7	25.7	121.3	3.6
66.5	-5.7	1.8	5.7	3.2	31.8	22.5		27.6	-1.6	260.4	-5.1
86.5	7.7	0.6	0.8	24.6	-1.4	3.8	1.4	11.8	-7.1	128.9	4.3
79.8	4	7	0.2	75.1	9.1	15	2.4	63.4	3.3	125.5	-2.7
59.9	52.2	-5	2.6	23.7	10.5	51.8	11.6	31	-1.6	59.8	2.6
71.7	4.3	7	-1.8	7	16.2	-1.2	4.8	33.4	-1.1	3.1	-0.1
128.8	52.9	1.8	-8.7	52.5	21.3	14	-3.6	24.5		85	2.2
21.6	14.1	10.6	0	-3.1	28.9	2.9	3.5	0.7	2.5	-6.7	0.9
18.5	29.7	0.8	15.2	68.4	39.1	31.9	10.2	21.3	-5.5	92.4	2.4
0.5	5.4	-1.7	3.1	-6.1	1.3		-3.4	14.7	-5.4	130.4	-0.8
0.2	0	-1.3	-5.1	17.7	10.9	26.3	4.3	14.5	-3.4	4.8	-4.1
	148.4		21.1	52.4	-7.1	34.3	5.5	-3.4	24.2	141.6
-6.4	0.6	-2	4.6	47.8	12.5	65.7	-1.9	20.8	-0.3	112.3	-0.8
3	169.8	-12.3	0.6	6.3	3.3	27.9	-3.5	-1.8	-0.7	-9.9	-1.7
172.8	155.6	44.7	0.4	30.1	13.7	28.3	54.9	25.6	0.6	282.7	5.3
-5.8	34.2	81.4	-0.1	25.2	34	12.7	-0.8	38.8	0.3	79.8	-2.7
242.6	78.6	73.5	2.6	64.1	14.8	47.9	-0.3	8.2	0.3	1.4	-0.1
101.3	50.1	51.6	1.4	3.4	5.3	71.4	-4.6	34.7	-3.8	4	5.6
134.5	8	93	-11.9	169.2	-2.3	27.6	4.2	-4	0.8	109.6	2.9
236.1	6.2	62.8	22.2	17.2	9.5	3.4	25.1	28.5	-0.7	-4	-8
167.5	-0.2	60.2	6.1	38.7	16.3	33.6	2.7	26.9	-1.3		-7.1
156.8	-4.9	55.8	6.1	43.5	11.8	29.8	1.1	27.5	2.2	-4.1
16.9	17.2	73.2	0.2	4.1	23.7	69.7		31.2	3.3	3.3	-2.4
193.2	49.6	59.1	-1.9	67.2	4.4	48.2	69.4	11.7	1.6	3.7	2.8
65	0	37	-2.8	32.5	-27.5	45.9	5	5.2	-1.9	24.6	26
165.2	36.8	63.5	1.7	68.4	2.2	18.6	-2.2	0.5	7.1	0.4	-2.9
-13.2	22	25.9	-11.3	8.8	7.4	22.6	-1.5	12.3	-0.6	0.9	-2.6
40.6	18.4	74.4	-3.2	73.1	14	-8	-4.9	-1.1	-4.5	61.9	23.7
272.1	-1.1	29.1	2.2	50.5	-2.2	54.1	-5.2	2.5	2.1	29.8	-2
60.2	7	-1.2	10.5	45.2	0.4	59.9	-1.3	-2.9	-1.6	-0.7	9.9
10.1	0.2	21.5	11.4	45	6.6	46.7	1.3		20.9	59.1	46.6
127.7	0	46.4	-8.6	33	1.8	4.3	-0.9	151	4.1	30.3	9.4
104.6	1.7	38.8	4.1	91.5			-0.8	180.8	0.8	57.6	-1.1
-0.9	62.8	75.6	18.3	172.8	-5.9	152.6	56.4	77	3.8	26.4	-0.5
	-9.5	52.8	3.7	23.2	7.4	-0.2	8.3	401.6	2	48.6	0.9
31.9	96.2	152.1	-4.2	67	0.8	-3.8	4.6	396.2	4.9	46.4	20.6
25.2	29.9	38.1	6	60.8	-2.4	-12.8	-0.6	231.6	0	3.1	6.4
40.2	66.2	42.8	27.4	66.5	-6.7	10.8	-3.4	176.7	-2.4	-3.6	-5.4
1.9	0	13.4	3.9	46.8	-30.6	-8.3	-0.6	127.6	3.9	0.8	-3.1
141.4	3.1	-0.8	-5.2	95.5	-2.7	-13.8	1.7	279.7	1.4	41.6	2.8
49.3	-2.3	22.8	-3.6	26	-4.4	132.8	16.6	191.2	7	83.5	-1.3
12.6	33.6	33.7	-3.3	70.2	-0.5	108	5.8	288.3	48.7	17.7	-1.2
36.5	16.6	53.6	-4.3	34	-9.6	145.3	10.7	242.8	-1.1	39.7	-2.8
45.2	9.4	11.6	-2	2.4	30.8	68.2	-4.2	366.3	5.7	14.6	-2.6
61.7	5.7	74.6	5	2.2	2.7	125.2	9.5	253.7	-3.7	32.6	5.7
64.7	11.1	16.9	11.1	57.6	31.7	-4.1	-0.7	391.2	0.2	11	-0.1
74.9	14.2	61.2	14.1	12.8	-0.1	7.5	4.3	298.2	1.4	84	-0.2
-1.8	11.4	5.8	12.9	10.8	29.4	210.9	6.4	382.2	0.7	20.7	1
41.5	0.8	30	5.3	43.8	0.6	141.5	1.5	319.8	7.3	-3.7	-0.6
84	1.4	37.2	0.9	102.8	15	231.5	-5.3	155.2	68.8	34.4	0.4
6.2	11.7	17.6	-2.5	37.1	61.6	152.9	-7	191	-3	14.2	-3.2
	-0.9	8.3	-3	15.8	-7.9	116	106.2	277.4	-5	44.8	5.9
294.7	11.7	34.4	-2.1	43.1	-0.6	4.2	-3.7	-1.7	-2.1	-1.5	-3.4
157.8	6.3	33.8	21.9	-2.6	-5.1	1.5	16.1	205.2	11.5	63.2
135.6	-6.8	53.5	20.7	69.1	4.2	120.5	27.8	163.6	7.6	51.3	0.3
0	16	20.1	3.7	58.1	-7.7	2.3	-3.4	84.3	-0.5	29	-2.5
6.3	7.4	48.9	0.4	68.7	4.3	200.5	2.1	238.4	-5.2	4	4.1
112.7	3.7	30.4	3.2	31.4	2.1	0.8	-4.3	236.4	-0.4	16	-2.8
114.6	1.8	33.6	2.2	124.2	5	84.8	0.3	226.2	1.2	61.3	-2.3
1.8	1.9	34.9	6.3	41.8	-6.6	107.5	0.5	-3.8	1	38.6	-4.9
144.8	1.3	33.7	-3.2	22.8	2.8	244.9	63.4	143.7	2.4	31.6	-0.4
46.1	3.9	1	3.9	18.5	7.1	7.1	-4.1	182.5	4.1	57.8	-8.9
6.2	27.4	43.6	4.8	46	-4.6	71.8	-0.2	309	0.2	19.4	6.7
77.1	37.7	7.3	5	46.3	-33.4	194.4	7.6	223.6	4.5	66.3	-2.2
119.3	1.1	25.1	4.2	92.5	-8.7	25.1	0.1	90.1	-5.2	1.6	-3.7
1.6	10.3	2.9	8.8	93.5	-9.3	14.8	0.8	150.1	2.6	8.6	2.3
-1.9	-10.2	10.1	-0.8	19.5	3.6	171.9	-1.6	10.2	0.1	44.2	30.8
93.2	-2.4	9.7	-0.7	44.8	-3.1	2.4	-5.1	171.2	20.6	19	-6.3
134.6	2.3	37.4	0	2.3	-0.3	87.7	5.8	-6.1	16.7	54.4
	1.3	30.2	4.6	17.5	-2.5	107	-4.9		6.5	31.8	-5.8
-6	6.1	3.1	-0.3	78.8	-5.3	177.2	-3.3	35.8	3.9	39.4	-3.6
16.1	4.5	48.3	9.7	31.8	-2	130.2	-1.1	29.2	2.5	42.7	5.4
-1.6	25.2	7.9	10.1	38.8	138.3	134	-7.8	-6.8	32.1	21.5	-6.8
-1.8	0	39.4	-1.2	45	17.6	71.8	1.2	57.3	2.7	42	-2.5
3.9	18.2	44.6	6.3	88.5	1	154.8	23.3	7.7	0.7	39.9	-1.5
8.6	6.8	33.7	11.8	107.1	1.4	95.6	-7.1	5.5	-5	26.3	-0.4
11.1	4.1	38.3	30.1	56.4	-3.1	-0.7	5.5	28.4	-0.5	16.5	1.2
17.1	5.1	26.5	-3.8	101.2	5.7	99	2.8	-2.9	8.3	60.5	19.2
17.7	2.9	17.8	-0.1	132.8	-5.2	228.4	-9.8	-2.9	31.2	22.1	2.5
1.4	-2.2	35	-0.7	103.2	-5	102.5	-0.2	-3.2	1.3	2.2	0.8
11.7	0.5	-1.6	1.7	14.8	6	150.6	0.6	16	-2	38.8	1.4
25.1	-1	22.6	2.7	59.7	-0.7	186.9	0	51	5.4	31.4
49.4	-2.4	6.7	-0.4	70.9	4.1	194.2	1.7	-3.6	-1.4	24.7	2.8
31	36	12.8	44.4	124.5	-4.6	124.5	48.8	31.5	-0.9	16.8	-1.7
4.3	14.7	39.8	3.3	79.6	76.2	117.4	-3.2	40.5	0.8	22	6
59.8	27.7	52.9	11.6	113.9		168.9	-10	31.9	0.3	-3.2	1.3
3.6	7	72.4	-16.6	156	13.9	257.2	-0.2	23.5	-1.6	64.2	2.6
6.1	11.7	-3.1	-7.3	94.2	38.5	192	16.7	37.3	-2.7	33	3.1
35.1	9	17.6	-2.2	82.5	-7.2	51.9	-0.6	55.8	6.4	37.7	-4.7
21.2	28.3	31.7	-4.9	0	1	267.5	0.6	34.5	0.6	1	0.6
1.3	38.4	11.8	-2.7	74.5	43.5	214.8	-9	106.9	-0.4	18.6	-1.8
11.9	11.7	38.4	5.3	33.6	19.8	140.5	3.3	100.5	5.9	72.4
1.3	6.6	12.4	-1.6		13.8	143.5	-3.6	56.7	2.7	63.9	-3.4
0.6	16.6	47.6	-8.3	79.7	-7.4	72.3	-3.6	86.8	1.6	42.5	1.8
1.7	6.8	69.9	-4.3	1.9	-1.7	251.5	4.2	6.6	-1	28.8	5.6
12.1	14.5	38.8	11.8	50.8	-5.7	168.6	-7.6	48.7	3.1	36.2	-1
10.1	11.2	67.9	-5	-3.2	-1.9	-9.3	119.6		1.9	32.6	2.4
2.7	27.5	61.2	9.2	-0.8	10.2	52.7	-9.6	58.1	29.8	1.2	-1.7
24.4	5.7	42.2	2.7	120.8	43.8	51.2	4.5	58.8	1	2.2	-4.6
20.2	21.1	-4.6	3.2	353.2	23.6	70.5	0	-1.9	3.5	107.7	-2.5
11.8	14.9	27.2	-2.2	86.7	42.5	156.2	-5.8	68.2	1.1	34.5	0
-0.9	12.4	50.6	2.1	424.3	163.9	152.3	-12.8	3.7	-5.9	41.8	-1.5
13.6	35.4	20	4.1	-13.5	96.4	290.2	1.9	55.7	-1	15.7	0
1.3	23.2	-2.1	0.8	95.4	30.8	152.7	-0.4	132.7	1.8	33.3	0.3
27.2	16.1	15.9	-2.7	127.7	5.5	106.5	1.8	37.9	-1.4	-0.7	-6.4
12.7	13.2	30.4	-5.4	108.8	25.2	233.8	-2.6	1.4	-0.2	5.4	1.3
3.4	1.7	62.3	2	-2.5	65	135.6	5.2	6.5	2.4	27.8	1.3
45.5	17.9	11	25.7	110.2	2.1	140.5	-9.4	3.3	3	87.4	-0.7
21.6	23.4	19	7.3	62.5	23.1	247.9	-6.4	-2.5	1.7	52	-2.3
19.2	0.3	27.8	-2.6	58.2	13.4	2	9	-2.7	-0.3	23.1	2.4
19.6	-1.2	32.2	-5	113.7	39.8	-8.2	84.9	68.8	-1.6	26.1	0.2
4.5	-2.3	35.1	0	129.4	-3.8	255.4	3.9	1.9	-5.7	2.5	-0.4
12.5	1.3	-0.7	-3.6	-2.2	13.8	258.9	3.1	3.8	0.8	32.4	11
12.8	7	-0.2	0	51.9	35.4	39.4	-0.4	0.8	0.9	35.8	1
25.1	15.8	25.9	3	97.2	20.1	-9.7	2.4	69.9	10.8	37.6	4.8
95	6	27.8	0.9	94.9	-5.6	207.5	14.6	-1.8	3.9	28	12.3
12.6	9.3	3.5	-1.8	135.2	1.9	75.2	7.5	123.8	1.9	68	-2
32.8	18.2	15.1	-4	26.9	-5.2	209.1	1.9	5.8	0.6	46.3
51.7	11.7	40.2	1	-18.4	4.5	51	-0.6	0.5	-0.9	20.1	3.2
31.6	6.4	47.3	-0.6	102.2	3.7	99	-6.8	125.8	-0.1	40.3	-6.8
0.9	5.2	-0.3	1.3	60	8.1	-2.1	-3.4	52.7	34.6	-4.7	3.4
17.8	-0.8	24.1	0.9	117.4	-11.9	-6.7	-1.9	37.7	-0.1	23.7	-1
33.3	21.8	11.9	-0.7	77.5	11.4	-9	5.3	160.5	-1.2	39.7	13.9
8.1	0.4	15.8	3.5	48.1	1.6	285.5	-2	162.3	2	27.8	34.7
13.1	33.2	32.1	-2.5	-3	6.4	90.8	0	8.6	0.8	4.3	54
10.9	0.8	82	0.5	78.8	26	0.2	1.9	57.5	2.7	32.7	-3.3
13.5	18.1	36.4	17.3	92.1	0	257	-1.7	80.4	-0.8	-7.9	-3.7
1	-2.4	33.8	-4.1	1.5	1.5	119.2	-3.6	-4.5	-5.7	1.2	-6
7.6	4.7	20.1	0.5	65.1	-2.5	45	36.4	2.1	39.7	25.8	10.7
11.6	-0.4	32.4	28.5	35.2	4.9	99.8	-7.1	-0.2	-7.4	2.1	2
27.8	1.3	23.2	2.4	119.4	-3.1	12.2	2.1	117	-4.5	73.8	1.4
28.2	0.5	14.1	4	156.1	3.3	114.4	-3.9	48	0	15.2	4
16.3	7.5	46.9	4.2	-0.2	-0.6	156.2	-0.5	113.5	18.5	-3.3
5.7	5.7	1.6	-4.8	184.2	-1.8	87.6	-5	1.9	3.1	53.3	-0.1
15.9	-0.1	13.2	39.4	155.1	22.5	164.3	2	45.2		37	-1.2
11.5	20.8	8.8	1.9	91.3	-1.9	-9.5	2.7	-8.5	-4.5	40.8	8.8
10.2	2.2	30.6	0.4	109.7	47.9	175.8	5	-1.3	0.5	3.2	4.7
26.6	1.2	17.2	6.7	180.2	-3.2	54.5	8.4	49.9	3.4	29.9	16.5
31.8	14.2	38.1	-1.2	130.8	-2.7	277.4	-1.3	49.9	3.7	119	-2.1
10.1	-1.6	14.9	3.2	-2.1	1	309.4	-3.3	-1	43.8	24	-2.4
24.4	5.2	5.9	-2.1	184.6		101.3	0.6	48.4	2.1	36.9	4.3
7.8	4.6	37.5	4	144.9	0.1	5.7	0	1.2	0.8	18.9	6.7
14.3	-42.7	20.5	-3.8	46.8	-13	523.1	2.6	87	-0.2	3	2.9
19.5	-24.8	13.6	-5.3	71.4	3.2	75.5	2.1	-1.8	1.6	41.8	5.7
33.8	5.3	15.9	12.4	206.2	0.1	108.3	24.7	86.1	-4.1	3.8	-4.4
2.5	-8	28.8	19.6	229.8	-3.8	146.1	66.8	-2.5	2.1	90.5	-4.3
18.9	-54.3	31.9	1.6	108.2	6.5	5.7	-6	84.8	4.4	0.6	9.4
53	-367.5	14.2	-2.7	51	4.2	12	4.7	193.4	-2.3	61.7	10.6
0.8	28.8	10.5	-2.4	98.7	15.5	6.2	3.2	40.3	7.6	6.4	-15.2
44.2	1.2	51.7	0.4	182.8	-3.5	-4.3	2.5	303.6	4.4	3.8	4.9
46.3	-46.6		1.9	184.5	90.1	96.5	-1.8	-3.9	-6	23.1	21.1
32.5	-108.4	-4.6	-0.8	115.6	27	90.8	2.9	125.3	-1.8	1.9	9.5
12.4	-5.1	157.4	-2.8	210.8	-0.7	145.5	-1.6	60.4	-1.6	45
3.7	-12.6	119.8	0	202.6	3.7	7.9	-0.9	183	1.7	35.3	14.3
7.9	-71.4	-0.7	-2.8	218.1	5.4	35.5	5.4	74.5	10.9	2.6	3.5
14.1	-33.7	152	0.4	25.8	-3.6	83.1	-0.6	117.1	-5.2	55.9	2.2
24.6	-15.6	222.9	-1.3	35.5	13.2	268.7	-1.7	66.8	1.6	22.7	125.5
19.6	-230.1	-0.6	-2.2	2.5	-4.9	240.6	-2.8	15.9		-0.4	7.8
16.2	21.2	4.8	1.1	1.7	-6.8	125.3		-3.7	-4.5	50.1	3.4
29.6	51.4	151.9	-2.1	10.2	-6	3.1	101.8	202.9	0.5	-4.3	3.2
20.9	-76.9	89.8	-6.7	8.5	5.8	5.2	4.3	27	3.4	24.2	-8.8
-0.8	-90	186.1	-0.4	89.2	13.5	-14.5	-3.8	90.8	3.7	-0.8	-3.1
24.3	-245.3	154.6	2.4	154.8	6.5	106.2	4.1	8.6	43.8	55.9	-9.1
9.6	-81.4	141.1	-2	41.5	1.5	2.2	6.4	158.5	2.1	30.4	-1.6
24.9	-36.1	139.4	0		-3.3	0.2	100.7	17.2	0.8	-0.2
-1.2	-265.2	169.3	0.2	-2.4	0.6	-0.2	1.3	85.9	-0.2	-1.8	30.4
20.3	-83.5	140.4	-3.5	157.8	4.5	198.5	7.6	54.3	1.6	-2.1	-4.7
8.5	-94.2	190.5	0.7	190	-3.4	7.8		109.3	-4.1	4.7	7.9
28	0	211.9	-4.4	0	27	-0.2	102.6	89.8	2.1	2.8	5.6
25.8	105.4	84.4	-1.3	221.7	5.6	0.2	-8.6	-0.2	4.4		7
30.1	122.7	69.9	2.7	390.2	3	107.8	-13.8	34.4	-2.3	10.3	14.3
5.6	143.3	196.9	0.1	165.9	31.4		-5.7	93.4	7.6	-5.6	0.4
13.8	-21.1	117.1	3.2	260.1	-4.5	102.3	-1.1	6.5	4.4	61.1	-3.8
15.4	111.6	140.8	7.7	-1.2	-7	63.1	-12	44.4	-6	41.2	9
	131.3	95.1	0.7	-12.8	0.3	9.3	6.6	35.5	-1.8	58.3	5.6
16.6	129.4	217.4	10.7	124	4.3	49.3	41	70.8	-1.6	46.4	-1
2.9	101.6	132.6	5.2	253.4	6.2	130	-18.1	37.2	1.7	18.9	-7
5.6	0	54.7	-8.8	152.8	-4.7	42.4	2.4	6.4	10.9	1.4	0.3
10.7	-16.1	132.8	-5	319.6	17.7	83.7	2.6	1.9	-5.2	22.4	-2.4
18.2	32.8	109.4	-0.7	287.4	-2.1	89.9	-1.3	57.2	1.6	72.7	-7.1
31.6	7	126.6	1.3	73.7	0.7	64.2	0.1	-1.6		49.6	4.5
-4.2	-178.6	149.3	1.1	57.5	5.5	145	5	40.7	3.3	43.1	1.7
37.4	-218.6	88.2	-1	-12.6	-0.2	95.8	-3.9	95.5	0.8	56	-3.1
1	-121.7	234.2	2.5	205.4	-0.4	4	48.8	2.6	-0.9	40.8	13.6
40.8	-289.4	135.7	6.6	209	-5	0.7	10.1	3.1	-3.1	35.9	4.9
44.4	0	113.8	-1	160.3	1.9	65.9	-25	95	-3.6	40.9	2.9
6.8	193.2	124.2	5.4	186.5	9.7	85.3	3.9	104.8	-0.3	39.7	2.9
9.4	130.8	117.6	-1.1	124.8	9.2	51.8	-25.6	74.6	2.9	50.2	-0.4
-0.6	114.7	143.2	53.2	67	7.1		37.8	73.9	-4.5	24.4	114.8
9.3	103.9	-0.9	1	187.6		114.7	54.9	137	4.5	36.6
13.6	170.2	124.8	8.1	104	-0.1	-13.7	4.8	35.1	-2.9	230	-1.4
15.9	172.9	185.1	2.4	135.2	-0.2	170.6	4.3	35.4	-1.5	62.3	-1.9
82.3	143.6	185.9	2.4	146	-0.4	45.4	-29.7	59.3	-5.9	46.3	-1.4
92.7	152.4	207.1	-2.4	-15.8	-4.9	104.9	-35.3	120.4	-3	8.9	1.7
23.7	140.7	177	1.2	3.1	4.8	225.7	44.5	66.5	3.6	21.3	10.4
52	141	67	-4	-0.5	2.1	183.8	-2.5	-9.4	-5.4	44.7	-0.7
-2.3	144.4	239.4	2.9	1.3	-9.8	146	-2.4	55.1	-2.7	18.7	-3.6
-1.3	122.9		8.1	205.8	1.5	131.4	13.6	17.3	14	43.3	0.6
44.4	142.7	21.6	-5.6	216.6	-2.4	193.6	-36.6	79.2	-0.5	35.1	0.7
29.7	176.5	14.4	1.5	169.7	-5.7	73.2	-5.3	15.9	1.4	-1.3	-2.7
45.5	151.8	26.3	-2.7	225.9	-1.8	113.6		138.5	-1	11.2	4
23	167.3	37.1	0.8	-8.8		85	-0.5	2.5	2.6	4	1.6
8	100.4	10.2	1.6	74.2	-12	224.8	2	45.2	-2	43.7	-2.2
27.1	187.6	9.9	-5.6	174.5	92.8	151.2	1.1	111.5		100.7	-2.6
34.5	151.7	19.4	23.5	106.9	88.2	118.6	1.7	0.9	-1.4	32.7	-1.7
18.7	172.3	35	-5.5	75.5	12.8	-5.1	-1.2	17.5	14.4	48.4	-1.3
13.2	160.8	1	2.2	118.9	5.9	136.5	-3.9	93.6	16.6	-0.1	-0.8
	119.2	19.1	1.5	141.7	26.5	87.3	-4.4	85.8	0.1	109.3	-1.4
27.6	151.7	0.1	2	108.7	10.3	68.2	0.2	9.7	-1.4	2.4	0
0.8	160.9	5.7	-3.8	217.8	15.8	65.2	2.4	83.8	-1.7	4.5	1.9
12.9	101.7	26.6	2.3	297.1	2.2	195.2	-3.2	68.8	-1.1	-7.3	1.6
	123.2	1.2	2.9	243.1	-6.7	161.8	2.5	-9.4	1.2	17.8	0.1
14.9	0	14.3	2.8	5.2	25.7	145.1	-3.3	55.7	2.9	150.1	32.9
124.5	15.6	19.2	-2.3		-0.8	138.9	-2.5	54.8	-1.2	16.8	-2.8
-9.9	13	1	-2.7	14.4	60.2	101.1	2.4	73.7	8	30.2	28.7
75.3	-26.7	42.1	0.8	79.5	-2.2	62	-3.4	48.8	-2.7
175.4	36.2	1.4	2.9	21.2	8.3		2.7	97	3.2	88.2	7.1
120.8	16.1	40	3.8	8.5	13.2	166.2	3.9	29.8	-1.9	74.7	-6.3
62.5	-11.8	37.8	5.8	5.2	56	144.2	2.4	108.1	-1	74.2	-3.8
0	103.5	9.5	0.6	59.2	-4.5	81.5	3.8	4.2	-0.1	109	6.8
139.6	31.1	32	8.6	62.2	9.7	163.7	-2.4	91.7	-2.9	120	-2.7
41.3	41.9	38.7	17.4	101.2	23.4	121.4	-4.5	123.2	-5.9	65.6	1.6
110.7	-49.2	48.2	1.9	96	72.9	220.6	3	73.5	6.7	67.3	-5.1
	0	72.3	9.5	127.1	96.8	94	3.7	-2	-1.2	94.1	0.3
24.6	-5.4	-0.8	2.9	10.9	-6.5	122.4	6.6	5	0.8	46.8	2.7
47.2	-144.6	47.2	7	58.1	-10.7	167.5	2.1	106.2	-1	94.6	-0.9
13.3	-76.7	31.1	8.8	97.9	15	106.3	38.3	42	2	114.4	-1.3
21.4	-61.9	1.1	3	82.1	4.4	68.5	-1.4	2.2	2	24.4	0.8
49.4	16.9	21.6	-0.2	83.8	133.4		2.6	67.3	2	128.1	11.1
-7.7	-37.6	9.3	3.8	66.4	-3.1	4.8	-2.8	3.2	-2.2	78.8	-1
25	-79.9	-6.5	9.1	66.2	-6.3	52.7	-2.1	2.9	2.2	14.1	1.3
33.4	-145	39.8	-2.8	66.2	10.2	93.5	-8.4	71.8	-5.1	98.4	1.3
-1.3	-66	3.5	6.9	107.2	8	-2	-0.5	215.8	5	68.5	3.1
25.6	-237.7	46.9	-1.5	2.6	26.4	70.4	1.8	112.9	0.2	0	5.2
85.8	-18.3	0.5	-3.1	121.4	-0.6	86.1	3.1	87.3	1.4	27.5	26.6
67.8	-11.3	22	10.9	75.2	18.2	70.7	6.3	32.1	4.7	75.1	-0.2
30	-10.3		-1.2	93.2	3.5	95.4	3.3	2.8	1.7	19.2	0
173.1	-94.7	13.7	6.5	2.6	22.5	-3.1	-0.6	4.5	-1.8	84.8	0.1
0.1	-84.7	3	0.3	75.2	14.4	59.2		0.7	9.4	33.9	0
81.4	-25.6	24.9	4.8	135.7	21.2	-13.5	-3.3	58.4	0.1	32.1	2.6
11.9	28.7	34.6	-4.2		29.2	51.5	27.1	2.9	1.3	4.2	-2.2
	0	57.1	1.4	-1.4	34	21.8	6	84.8	0.2	-3.8	-1.7
-2	108.3	45.6	4.3	4.5	3	53.4	-3	4.3	-1.8	74.8	-2.1
95.5	85.7	26.9	0.6	6.3	185.1	8	-1.9	61.1	-2.9	69.9	1.8
148.9	165.8	65.3	-0.4	-2.8	-1.5	54.2	3.3	67.3	-0.6	44.8	10.2
1.3	120	54.5	3.3	7.2	-6.2	71.4	9.8	79.7	58.9	82.2	-7.3
112.4	136.2	18.6	-4.8	67.5	-11.3	72.9	2.6	24.9	-5.5	48.9	-12.4
123.3	58.7	68	3.7	19.2	-7.3	39.6	5.7	52.5	1.7	6.5	-15.1
91.8	204	42.3	1.8	27.5	-0.2	36.5	-7.8	70.5	1.8	61.2	-2.5
-5.8	110.3	35.2	2	96.2	0.6	7.1	-3.3	24.4	7.5	86.5	-0.4
80.2	105.5	36.4	2.8	-6.3	-5.9	130.2	6.3	77.5	2.8	84.6	1.1
112.8	120.2	79.6	-1.1	32.4	9.6	21.2	14	95.3	-1.4	33.5	-2.2
77.6	47.9	51.5	-2.5	7.2		96.1	2	19.8	1.9	54.7	-6
135.2	0	77.3	-2.4	10.9	9.9	101.8	-8.9	143.1	0.1	15.6	6.1
96.9	52.6	55.6	8.7	129.3	6.1	-3.8	-7.3	107.3	4.6	35.2	-3.8
139.5	66.1	65.3	0.7	27.2	-1.6	26.2	-2.4	2.2	-4.1	-0.2	2.7
67.6	88	113.8	0.3	70.2	2.8	35.9		-5.4	-9.4	0.3	-11
99.8	15	35.9	-1.4	86	-29.9	121.4	1.3	119.5	1.1	69.3	-1.6
104.6	112.7		-7.5	37.7	38	43.7	-2	43.8	3.3	0.2
130.1	75.6	66.2	-5.3	6.9	0.4	44.2	-1.4	54.7	1.1	135.2	-6.1
95	88.3	47.1	-2.2	-2.4	4.9	124.5	5.7	51.6	-2.9	61.2	3.3
76.4	0	93.6	-6.8	0.8	27.1	2.2	2.8	55.1	-11	-0.5	-7
83.3	73.4	33.3	5.4	30	38.5	60.4	-3.2	64.7	-0.1	20.3	-2.2
94.2	108.9	0	1.7	112.4	114.3	50.4	2.1	79.2	-1.4	87.6	-4.2
136.1	58.4	1.6	-6.2	106.4	97.1	108.8	2.9	18.3	2.4	0.7	-0.3
132.5	29	34.6	-4.2	105.2	-8.9	4.1	2	113.5	-1.2	-1.3	3.2
44.6	57.4	44.4	-3.4	202.8	4.7	16.9	7	87.1	5.3	83.8	-5.3
76.6	68.1	15.2	4	38.7		46.7	0.9	10	3	-6.2	2.5
154.1	152.4	14.4	-5.4	50.2	28.5	-3.5	-1.9	-8.8	4.1	8.8	-1.8
79.5	169.6	17.2	-3.6	34.3	38.6	67.7	3.8	-3.5	3	33.5	-3.4
54.3	-105.1	7.1	-0.4	6.7	3.4	64.8	12.4	22.2	-2.3	103.6	-0.7
119	106	37	-1.5	-5.5	-24.3	80.6	-1.4	69.2	-0.5	138.4	0.2
88.3	139.6	99.3	-2.5	20.9	128.8	51.4	11.2	88.9	-1.4	-3.4	3
0	72.3	19.1	-10.3	17.7	14.1	60.8	2.7	93.9	-2.1	-1.9	42.5
106.8	124.5	14.1	-5	140.7	123.2	-2.6	3.9	5.2	4.8	70.3	1.7
49.6	97.1	15.9	18.8	8.6	-5.3	73.8	19.4	112.8	-3.9	71.6	4.5
	64.1	34.8	1.8	36.6	-0.7		4.9	83.5	-0.7	32.4	3.8
280.8	117.8	9.4	-3.9	52.6	-6.5	167.2	23.9	46.6	-4	19.5	5.9
73.2	51.8	329.4	2.6	60.5	-43.1	120.7	-10.8	107.2	2	51.4	2.8
-1.4	88	8.8	-3.2	62.5	6.7	234.8	0.3	4	-15	50.5	13.5
-2.3	13	16.8	1.2	32.2	65.4	39.9	-0.7	81.9	-1.8	57.8	4.5
6	-4	59.5	-1	28.3	55	6.5	24	64.2	0.2	31.4	15.7
265.2	91.1	17.9	2.7	37.9	38.7	102.2	10.7	90.9	-1.5	13.7	-2.8
26.8	-487	39.8	5.3	43.8	30.2	6.1	1.9	2.3	-15.5		4.4
17.7	0	24.9	9.6	36.9	41.3	325.1	-11.3	-5.1	2.4	4.6	-4.6
	98.2	38.8	-5.3	5.3	65.2	226.2	-11.9	84.8	5.2	4.9	-5.2
108.3	50.2	67.7	1.9	26.7	-29.2	53.5	12.9	-1.3	-0.7	29.9	-1.1
-0.3	48.5	100.2	-0.4	56.8	-7	366.2	9.5	1.8	0.2	4.8	4.7
108.5	-58.5	5.6	-5.2	52	11.1	190.8	-12	73.5	3.3	1.3	11.8
8.6	45.8	13.6	1.4	4.1	69	170.5	2.2	2.8	2.9	1.5	199.6
-4.9	7.7	41.7	3.9	2.1	217.5	142.1	1.8	-1.2	3.3	7.3	1.4
-7.9	1.3	3	1.8	31.5	-12.3	-7.6	8.7		-1.8	-0.9	16.5
233.5	77.4	42.8	-1.4	49.1	13.2	81.1	-4.2	57.4	2.4	4.5	-0.9
144.9	67.6	30.3	8.7	10.8	3.1	100.5	29.9	80.1	-3.7	2.4	6.2
-1.7	-48	24.2	2.7	45.3	-30.2	144.9	-3.7	94	13.2	19.5	1.5
-6.3	73.5	44.6	3.3	4.2	-23	97.5	12.9	129.4	12	21.1	-4.5
1	102.9	31.2	1.6	6.8	-10.3	106.5	25.6	222.4	-2.3	28.1	5.4
124.6	48.2	7	-4.6	7.8	1.5	338.3	-12.7	102.8	3	-5.6	-3.8
154.1	81	12.2	13.3	13.6	5.6	341.2	-0.6	71.5	31.3	50.7	5.7
10.6	-92.9		-1.5	6.3	9.8	99.1	-3.5	76.1	27	34.4	-8.7
146.1	83.2	118	2.8		79.5	8.4	-1.1	90.9	-9.2	43.5	-8.3
-2.4	75	10.3	-1.7	26.4	93.2		4.1	90.8	-1.5	3	95.5
109.6	0	40.6	8.2	-0.2		-0.6	-0.7	173.1	66.5	59.5	-5.3
-5.2	68.5	-0.2	5.4	72	-4.1	-3.6	-3	-3.9	1	0.6	0.3
-0.2	43.8	60.4	-3.9	280.4	-3.9	57.5	-2.1	123.4	9.2	82.3	-0.9
2	78.7	131.5	-3.2	26.6	-0.2	23.4	1	151.9	3.9	82.3	0.8
0.8	23.1	-13.6	4.2	-5.1	14.2	14.5	-1.4	4.8	3	40.6
6.6	-45.9	76.7	0	48.8	-8.2	3.2	-3.6		74.7	74.7	2.6
	13.3	46.4	-0.4	72.8	-4	49.7	-0.7	3.4	0.2	0.3	-4.7
99.1	-48.6	74.1	-1.6	33	3.3	73.4	-0.9	-0.9	2.7	-3.2	-5.3
-5.1	0	56.1	-0.5	1.3	2	127.7	-3.9	14.2	9.8	-2.2	0.7
92.7	-1.7	79	12	43.6	-2.6	50		0.3	6.6	4.2	-3.1
70.4	73	110.2	-1.1	65.8	-1.1	98.2	-4.7	-2.7	-2.8	22.9	-2.3
109.1	65.6	-8.4	2.9	28.2	1.8	86.5	-1.2	9.2	1	47.2	-2.4
44.3	53	29.6	-4.9	64.7	2	34.6	-0.5	4.4	3.1	-2.2	2
63.6	45.5	0.9	5.9	57.4	5.9	79.2	-1.9	3.1	-10.1	43.5	-3
10.9	72.1	58.9	4.3	48	-4	4.3	0.6	8.7	-2.6	88.4	1
60.9	83.2	56	59.3	26.9	3.1	33.2	1.2	-2.3	1.1	5.6	21.5
29.3	68.6	58.1	-2.7	52.1	20.8	30.6	0.2	5.1	0.7	132.4	-1.1
110.2	0	39.3	-0.5	54.8	18.6	3.5	2.7	-1.3	0.5	85.4	-3.2
80.4	160.7	72.3	-8.8	27.2	-0.3	59.4	-7.5	-1.8	5.8	-0.1	6.4
65.6	223.4	81.1	4.3	26.8	3.6	37.5	2.9	20.3	-1.3	59.3	1
-2.2	108.6	65.3	-6.3	-1.7	-3.3	76.6	-1.7	17	0.5	6.5	3.9
15.4	235.2	58.9	28.9	45.8	32.7	24.6	-3.5	38.1	-3.5	31.5	2.1
200.7	111	52.2	3.3	53.4	6.5	17.5	-1.6	2	-2.6	46.2	-5.6
211.3	133.4	17.9	63.9	67.3	-3.3	-0.2	-0.1	21.5	-11	-5	9
	214.8	72	-20.3	58.2	-14.6	31.6	0.8	13.8	-3.3	26.6	-4.5
115.4	232.5	89.8	16.9	0.3	-5.7	26	-0.6	36.6	3.8	3.6	-2.4
47.5	115.6	66.9	61.3	50.2	8	61.8	-4	39.4	2	5.6	-10.7
24.7	133.4	49.3	-13.3		0.4	58.2		47.4	0		2.7
2.9	108.8	51.2	-17.2	26.1	1.9	113.3	3.3	22.1	4.1	43.1	-5.4
34.9	0	58.9	42.1	31	-4.3	10.6	-1.8	29.4	-2.4	86.4	-6
-0.7	-62.2	52.4	3.3	92.4		2.5	4.3	2.4	0.4	34.5	-4.5
150.9	84	1.3	-14.2	33.2	8.1	59.4	7.9	8	3.2	161.6	-3.1
-5.9	29.6	66.1	-1.8	62.8	-1.9	-4.6	-3.7	0	4	21.5	-1.6
31.2	66.9	106.7	19.2	85.8	-0.8	24.3	1.5	-4.3	0.1	-2.8	-2.4
93	72.4	73.8	-33.6	37.5	1.7	59.6	1.8	32.4	143.8	75.9	37.3
9.4	56.8	84.2	-13.1	119.6	-0.6	47.2	-9.7	0.9	1.7	37	2.2
-1.7	31	22.4	71.8	119.6	-2.4	58.5	16.7	1.5	1	23.7
7	85.9	43.2	37.3	78.3	0.3	50.1	-1.8	7.2	29.4	4.6	-4.1
54.9	37.3	38.9	-2	153	-1.4	60.9	-0.6		-1	58.6	1.8
29.7	0	10.4	7.1	100.7	4.4	52.9	3.3	3.5	-2.4	87	5.5
20.6	113.9	5.9	16.1	117.8	3.1	10.6		57.9	0.3	5.4	-2.6
60.4	121.3	65.3	-24.5	89.1	-2.4	39.4	9	-2.3	2.2	43.7	1.6
0.6	142.4	1.9	9.3	134.4	-3.8	-0.3	-2.4	63.2	7.3	-4.1	10
11.8	110.4	36.4	39.3	74.1	4.8	51	1.6	2.5	5.2	65.9	2.8
68.4	157.7	69.2	-3.1	135	6.7	81.8	-3.3	10	-4.6	28.9	5.4
61.3	128.6	1.2	58.8	159.9	-2.6	48	-1.3	68	4.5	-1.2	5.7
-3.1	134.5	39	47.1	41.5	-4.8	4.4	-3.2	-3.8	85.9	-4.9	-2
53.6	134		33.4	122.1	1.9	53.2	14.6	25.8	4.6	31	2.9
20.3	124.6	65.7	-17.5	173.8	1.9	110.2	52.8	8.2	6.1	21.8	-1.3
3.6	118.6	101.8	10.2	14.1	14.1	87.5	-1.8	-4.4	6.5	41.4	-2.5
23.7	134.9	89.4	-7.8	136.5	-3.2	58.4	-3.4	90.9	-4.5	27.9	0
0.7	0	65.6	-15.9	121.2	3.5	6.5	-7	3.6	-3.3	61.7	-1
12.9	71.3	-10.1	-10.6	152	6.7	69.3	8.5	4.8	0.3	32.1	-2.8
46.5	111	96.1	12.1	105.4	1.3	71.2	-2.9	0.2	4.2	3.9	4.1
48.7	112.1	147.2	-3.4	55.2	-3.3	58.1	0.4	-3.2	-6.6	57.2	-2.6
	100.4	-1.5	86.9	50.9	-4.7	37.6	8.1	0.8	1.9	25.6	-2.7
143.9	96.6	110.3	-9.1	70.4	4	65.6	-1.4	199.2	5.6	-3.9	-1.6
87.2	95.2	82.9	-7.9	123.2	9.9	74.9	-13.9	-11.6	11.3		2.7
4.1	0	56.3	13.6	109.8	-1.8	12.3	0.6	85.8	6.5	4.8	6.2
29.3	132	76.7	0	135.6	-2.9	7.1	-8.2	-4.5	-6.6	0.7	-1.3
-20.9	167.6	-3.7	-0.4	97.3	2.3	-2.9	12.5	6.9	4	46	-2.6
1.7	150	4.6	-3.5	87.2	0.8	59.4		230.2	-0.2	23.7	-1.3
1.2	176.2	131.9	-21.3	116.8	-5	8.3	-3	63.1	0.8	10.3	2.9
366.3	118.7	106.9	-11.2	53		27.2	5.3	167.5	-2.8	33.2	-6.5
71.1	129.2	117.1	-23.4	66.5	5.7	26.2	37.6	67.1	10.9	10.2	-2.3
143.7	97.7	225.1	-14.2	157.8	45.5	-4.5	-1.5	3.2	7.4	30.2	3.4
0.5	114.3	145.3	17.3	86.6	6.2	-1.3	-5.7	79.6	-1.5	57.5	-2.8
149.8	101.7	5.4	15.7	77.2	-18.2	1.5	0.2	-7	1.6	3.2	-1.6
36.4	117.8	90.1	20.3	155.5	-15.6		100.2	-7.2	1.2	20.4	0.3
252.2	138.6	51.4	8.6	141	12.9	69.1	31	-0.5	4.6	-3.5	-0.2
29.3	119.3	0.7	74.1	111.1	5	58.7	-17.2	-4.8	2.2	5.7
-36.4	122.3	120.6	20.7	165.4	0.9	-0.2	44.3	39.1	12.6	20.2	0.6
129.5	0		1.6	72.3		61.2		3.8	-4.4	36.8	3.9
307.6	89.4	52.8	-6.9	62.5	-0.4	49.5	1.3	-3.1	155.7	-0.5	-5
119.9	54.8	27	-5.6	63.2	8.9	57.5	-1.2	-1.2	1.3	1.5	4
179	78.2	19.9	-9.8	155	17.8	48.8	-3.8	4	-3.9	16.4	4.4
130.6	88.6	48.3	-26	72.2	-0.7	51.2	3.1	92.5	-2.2	1.8	-3.7
-8.1	82.9	39	67.6	63.5	1.4	49	1.7	164	89.8	66.8	2.4
158.8	51.1	32.3	-0.4	113.2	-1.3	47.8	2	0.1	12.5	9.6	0.9
14.1	76.9	26.1	-4	69.4	10.7	48.2	-14.3	37.3	-4	36.8	6.2
4.5	48.8	1.8	12.9	123	-0.7	50.6	3.1	4.4	2.8	20.8	-0.8
126		34.1	-6.2	-9.5	9.9	80.1	3.4	122	1.6	-3.3	-4.7
		38.5	1.1	125.5	-4.7	53.5	-11	3.5	4.2	17.5	1.2
51.4		-1.1	5.1	127.4	6	51.2	-2	73	-2	0.7	5.6
82.3		40.8	-4.7	61.2	-2.3	3	-1.1	48.1	-6	17.9	9.4
5.1		54.4	-17.6	-3.7	1.6	61.9	7.3	-5.4	-0.4	25.5	-1.2
3.5		53.3	0	119.8	1.4	2.7	0.1	172.5	-3.9	26.3	1.2
146.9		20.8	-0.7	94.7	2.3	29.7	-8.1	63.1	-1.4	1.8	1.6
3.2		13.6	-2.6	241.5	31.5	115.9	0.2	154.5	51.9	16.5	-0.1
92.9		23.1	-1.1	94	-2.5	36.5	-3.4	96.4	-4.6		0
-2.9		25.7	2	140.1	-12.8	50.6	-2.6	-3.3	1.1	45.2	-3.3
42.9		61.1	-7.3	143.2	1.5	22.5	-2.7	70.8	-1.1	12.3	-1.5
0.3		20.6	1.3	62.5	0.9		1	-3.3	1.1	30	3.3
4.2		11.8	-2.1	-8	-2.9	142.2	6.4	90.5	-1.6	1.1	1.2
-11.3		23.7	0.2	87.2	0.9	4.7	11.2	47.1	-4.8	27.9	0.4
341.6		34.9	-4.4	36.3	-1.4	8.8	51.2	161.5	-0.1	54.9	0.2
3.3		33.9	-6.5	2.4	159.7	5.8		-5.7	8.2	1.1	4
99.4			2.6	70.1	24.6	96.9	15.4	-3.2	-2	16.1	0.6
122.6		141.4	-0.2	38.5	52.8	36.1	-3.4	0.2		27.3	7.6
337.7		99.8	0.1		8.9	-6	1.7	138.9	1.2	42.4	-8.8
168.6		125.4	5	73.8	28.6	136.2	-3.7	170.4	3.6	-5.5	0.3
-5.7		132.3	2.5	123	20.3	260.1	-2.8	6.8	-2.2	33	7.2
46.8		3.2	3.4	0.6	29.6	72.2	2.8	59.4	1.8	0	0.1
-0.8		-4.2	2	118.5	-1.7	175.7	-17.4	4.4	-4.5	3.6	0.8
-0.5		123.9	2.3	147	-3.5	4.1	-0.8	176.9	0.2	40.5	-0.2
44		102.1	-1.8	133.7	-0.3	-5.5	-6.2	28.4	-11.1	-5.2	14.9
0.3		99.8	2.9	88	4.3	-2.8	0.8	69.1	5.6	42.1	5
-0.4		99	-0.8	148.9	4.2	2.7	-1	-2.3	-3.2	25.2	-1.2
-3.4		126.1	1.9	231.4	-4.1	158.9	69.4	40.8	3.7	37.3	1.4
158.8		86.6	30.5	104.6		162.5	3	60.9	12.8	-2.4	3.8
-0.9		260.3	2.2	-0.5	-11.3		31.3	3.3	-1.3	-0.1	3.4
66.9		67.1	0.1	43.8	42.8	159.8	118.5	4.6		42.2	-0.7
2.7		136.4	-1.1	-18	-19.2	0.5	-1.2	72.8	10.8	71.2	2.9
-3.3		101.4	-0.7	158.2	177.2	2.7	2.1	89.5	2	-2.8	-4.3
9.4		106.3	3.1	88.2	-98.5	205.5	5.2	72.4	1.8	-0.5	1
67.3		82.4	6.1	89.8	74.1	-18.3	-3.3	-2.5	-3	40.8	7.4
31.3		-1.8	-2.2	87.9	66.7	62.8	-2.7	5.8	-3	55.2	2.1
		115.7	0.8	-22.1	95.5	241.7	-16.3	-7.1	1.5	44.8	0.9
33.5			1	103.2	0	170.1	-12	40.8	10.9	6.9	-5.9
16.1		92.6	3.9	24.3	5	136.8	141.4	80.5	2.3	62.6	2.2
303.8		53	5	163.2	-2	142.4	-7.8	90	3.7	24.3	5
121.2		89.3	0.9	88.6		177.2	235.5	-5.2	61.9	1.3	-2.4
150.4		-0.8	3.3	69.5	8.7	150.9	20.8	65.4	7	22.8	3
164.7		45.2	2.6	115.5	12.3	182.5	26.2	41.9		25	-4.6
231		29.1	-2.3	114.5	25.4	182.2	-12.8	93.4	2.3	1.9	-5.6
128.8		47.7	-0.5	-7.7	7.6	192.1		105.3	-3.6	73	0.2
8.4		77.2	3.2	84.8	23.1	141.2	3.9	239.2	-2.4	33.3	2.6
197.7		213.8	4.9	56.6		166.8	-4.1	44	-0.8	-1	-2.9
185.1		-2.8	8	-26		171.5	13	2.4	1.2	69.1	1.4
97.6		56.6	3.4	169.5		186.5	2.2	70.5	1.7	40	-1.8
134		120.9	6.6	198.6		165.8	-9	98.8	-2.2	14.7	-4.6
148.3		72.3	3.2	137.3		93.7	2.8	48.5	1.7	21.2	5.7
137.9		19.9	2.1	145.5		178.8	-6.4	-6.9	-1.8	36.2	-1.3
179.8		26.9	-2.1	101.7		346.1	74.5	55.7	-3.5	29.2	3.4
188.5		15	-4.2	163.2		173.5	21.4	105.8	3	61.1	4.2
173.5		50.7	0.1	210.9		153.5	-9.5	1.6	3.4	25.7	6.1
198.2		73.9	50	-12.8		127.8	2.2	133.2	3.1	3.8	1.7
136.8		102	0	216.6		87.8	-7.9	198.8	10.4	7.2	0.6
149.2		57.3	2.6	121.8			-11.7	152.3	-3.7	26	6.1
82.4		74.1	9.7			102.8	-1.1	-4	34.3	-4.2	-3.1
234.5		25.6	-2	74.8		145.4	3.2	121.3	2.2	-1	0
117.8		73.6	2.7	61.7		150.1	1.6	16.9	3	62.3	1.2
116.4		18.8	-1.5	136.1		123.5	-1.8	82.6			-7.3
8.6		86.7	7	144.8		93	-9.1	6.4	34.4	34.8	3
200.3		68.8	-2.3	63.8		124	-8.6	90.2	6.2	23.6	1.6
-3		82.7	3.6	2.9		136.6	12	76.5	-3.2	67.1	-0.4
27.4		89	2.8	11.6		154.5	-1.5	0.1	-10	72.8	-0.1
170.5		172.4	-2.2	24.6		291.6	14.3	77.4	1.3	2.7	0
		93.3	4.4	37.1		109.9	1.3	114.6	-4.6	62.3	2.8
31.3			3.8	72.2		242.4	34.6	159.5	-51.8	37	1.2
10.6		50.7	1.7	182.2		97.4	6.2	155.5	-12.1	57.7	8.5
20.3		-8.2	1.9	158.6		64	-9.1	74.6	1.4	37.2	-2.2
15.5		14.3	-8.8	171.9		170.3	5.6	286.2	0.1	91.8	0.2
35		0.1	4.1	68.2				278.3	4.9	77.1	-6
11.6		56.9	3.8	298.9		56.6	11.4	151.1	-10.5	29.9	-1.7
93.9		21.5	0	190.7		-11.2	1.6	60.6	-0.7	66.8	4.3
43.8		-0.1	3.1	133.8		28	0.3	-3.9	44	68.8	2.8
59.7		44.2	0.9	13.7		19.5	-1.9	46.1	1.4	99.8	9.4
3.8		40.2	4.7	40.4		133.8	-1.2	1	-9.2	81	48.9
58.8		11.8	2.3	301.2		85	3.7	115.2	17.6	-9.5	-2.2
45.7		-4.5	2.8	230.3		169.6	-1.4	3.8	48.8	100.8	0.5
82.8		39.2	-0.8	-10.2		87.2	1.9	109.6	5.9	57.5	-0.9
-2.4		46.1	3.1	105.1		123.2	-4.4	103.4	2.9	-4.2	1.7
20		26.4	-1.3	91		-2.4	4.4	89.3	26.5	72.8	0.6
-0.2		2.2	18.2	-31.7		114.8	34.9	64.2	-4	63.3	-4.1
0.8		33.1	20.8	61.8		110.8	2.2	110.9	111.4	56.8	2
58.8		21.1	-4.5	126.5		82.4	2.6	-2.3	75.1	54.8
30.8		40	-5.9	-12.1		30.2	4.4	-0.3	-14.9	12.6	-3.6
50.8		16.7	3.2	69.1		82.3	-3.4	37.6	-7	80.8	15.5
4.2		42.2	18.1	-7.5		-1.9	-0.3	-0.8	53.7	39.7	2.3
-3.8		28.6	-2.9	11.8		95.5	9.8	38.2	4.8	24.3	-2.8
-7.3		19.2	5	72.2		59.4	5	-1.5	15.8	57.4	2
15.2		33.5	53.6	15.1		39.8	2	99.8	27.5	51	3.6
0.8		33.6	18.3	76.6		-0.8	-3.9	6.8	-24	31.9	52.4
9.2		31.5	4.8	173.8		42.6	-9.1	39.7	-48.3	61	1.8
84.3		46.9	-3	42.8		75.6	6.3	59.6	-34.8	80.4	11.8
78.2		66.1	4.2	92.8		-1.2	41	124.3	-6.8	67.7	2.4
		43.9	14.9	-7.2			14	-0.4	45.3		76.5
-1.3		-0.9	-1.2	6.5		132.7	8.3	68.6	-12.6	15.7	-4.6
99.8		50.7	-5.6	-0.5		96.8	116.5	-4.5	10.1	14.6	-0.8
4.1		0.5	-0.2	139.7		263.5	1.2	176.8	12	0	1.1
3.8		27.8	62.6	133.6		166.7	-3.3	86.3	41.8	-6	2.7
75.8		8.5	16.3	-4.8		154.2	-4.8	98.8	11.6	0	0.3
27.3		17.5	8.9	80.8		4.1	-3.7	-4.5	31	14.2	0.5
-7.5		34.4	4.8	108		151	-2.5	147.2	7.2	21.6	10
121.4			3.3	27.2		130.6	-5.4	171.5		60.1	22.6
-7.8		2.2	99.7	163.7		218.7	4.1	2.5	-3.8	22.2	7.7
-2.7		3.8	2.5	176.6		327.8	-2.4	107.4	22.9	16.3	0.6
28.8		9.9	0	135.5		221.6	-0.5	-7.2	-5	26.4	-2.8
32.8		111.4	8	-9.9		168.8	-6.3	-4.2	1.1	232.3	3.7
7.4		44.9	-2	110.6		96.2	-5	37.8	1.1	27.9	-0.9
5.2		101.1	-4.7	139.4		178.2	4.4	54.4	-6	62.4	2.7
-3.8		65.2	28.8	500.3		85.4	26.4	251.8	2.1	42.3	-3.5
-3.5		-7.6	0.9	44.1		177.8	8.4	132.7	1.2	5	-9.6
2		19.3	-3.3	100		269.6		8.8	-5.5	14.4	3.6
45.9		93.1	-2.7	107.6		88.3	0.3	101	-0.7	22.3	-7.1
49.3		22.1	-4.3	262.9		108.9	-4.1	8.4	26.6	4.6	-1.9
-0.5		50.9	5	21.8		102.5	4.7	143.4	-2.7	2.9	-0.9
34.5		63	5.1	317.2		133.7	3.4	-1.2	59.9	-1.7	0.1
-4.8		11.4	-2.6	205		-2.5	0.9	8	34.4	56.9	5.5
-9.1		-12.1	1.9	9.5		146.6	0.3	69.2	10.2	12.8	1.5
79.5		34.9	-0.7	-11.4		106.9	-7.2	87.8	-8.1	3.9	-6
-9.8		28.4	2.8	189.4		140.8	-3.6	6.2	-0.2	20.9	-8.1
0		37	-3.8	45.3		275.2	20.2	119.9	-7.1	-0.1	0.2
-3			-3.4			194.6	46.9	-0.2	-1.1	2.7	4
87.6		54.8	9.1	-1.3		358.2	-2.7	0.2		34.8	-0.7
1.3		5.7	2.7	106.8		150.2	4.8	137.2	11.8	9.5	-5.2
		181.4	-1.6	169.8		230.9	69.6	-2.8	0.3	73.7	-4.4
53.2		37.4	6.7	-7.6		176.1	0.6	365.4	1.3	-0.5	0.4
22.2		136.6	-2.3	76.5		293.4	5.2	4.8	1.5	3.5	1.8
24.5		73	5.3	124.6		201.5	1.8	7.1	-2.8	14.7	-2.3
17.3		2.4	0.8	3.9		179.2	-7.4	198.8	-7.9	10.1	-2.2
39.9		56.4	10.9	118.8		247	-3.6	284.5	-2.7	-3.2	3.1
75.6		7.2	6.9	139.3		217.4	2	12.6	-7.6	0.1	3.9
31.1		108.8	-3.3	95.9		317.4	-5.4	-4.5	6.6	-3	7
63.5		67.9	1.4	128.1			92.8	2.9	-3.3	43.8	4.3
55.7		1	0.7	150.6		-7.1	20.1	-3.2	-5.8	68.5	3.9
66.2		9.3	1.1	188.5		191.4	2.1	0	4.9	-6.8	-0.2
41.4		7.9	4	164.2		140.6	-4.8	0.7	-1	18.9
218.1		5.3	22.5	121.2		-4.3	0.1	104.5	-5.1	-3.7	5.4
31.4		5.2	-1.2	263		249.5	3.7	595.2	0.2	6.9	3.1
162.1		-10.7	1	172.9		367	32.7	9.7	-0.9	7.2	7.3
93.6		11.6	0.8	83.7		2.3		-1.5	6.7	2.5	-7.3
124.5		192.3	2.8	160.3		79.1	11.4	1.7	0.6	25.4	-11.8
-5.1		121.9	-2.3	6.7		296.4	7.9	104	-4	2.4	-26.9
99.1		60	-5.1	140.8		77.2	6.8	98.8	3.1	11.8	0
67.8		56.3	-2.3	48.7		135.5	43.1	161.2	0.7	12.8	-0.4
102.7		193.6	112.3	55.8		291.2	86.3	301		2.4	-1.2
88		87.7	2.5	168.8		-3.3	-3.4	-9.2	3.3	11.7	12.8
81.1		181.4	-0.1	127.7		112.8	49.2	148.8	-2	6.5	9.5
135.2		226	11.8	6.2		49.8	6	332	-7.2	20.3	5.6
76.2		3.6	4.2	274.7		208.5	3.6	206	8.1	-1.8	6.7
55.9		58.7	10.9	110.3		228.8	1.4	2.5	4.9	25.2	-3
144.8		110.9	3.6	163.7		58.2	-3.2	172.8	13.2	88.4	11.3
77.1		62.4	6.2	105.2		179.5	0.3	3.9	-3.3	7.9
109.5		88.4	1.1	124.8		72.5	-8.9	-6.7	135.1	-0.4	0.6
108.8		227.2	3.6	25.6		226.7	9.3	-7.2		70.6	6.4
85.5		134.2	-0.7	2.3		46.8	24.1	102.2	0	2.4	1.9
174.1		126.4	13.7	8.3		92.5	-2.9	164.2	1.4	14.8	1.1
92		138.6	-3	166.8		210	2.4	1.5	-3.2	15.9	10.2
41.4		155.3	0.2	168.7		7.4	-1.2	5.8	4.1	-0.2	-0.1
57.3		59.2	32.4	140.2		153	-0.1	0.2	-3	33.2	-1.8
53.3		151.9	4.9	210.8		130.8	4.2	0.5	0.6	-3.8	0.6
64.8		125.9	11.7	60.6		85.2	-6.2	74.8	-2	1	1.4
131.5		145.4	3.7	186.8		261.4		1.5	4	35.2	5.7
		132.7	0.6	110.5		37.5	25.4	223.5		4	2.4
12.7		165.5	-4.7	-8.2		78.5	-6.9	4.5	-1.8	80.8	-4.8
6.6		74.2	4.1	81.1		80.2	0.7	0.8	6.7	46.8	-3
3.5		136.8	0	64.8		102.6	-19	1.4	-3.4	-0.1	1.3
22.1		169	-4.4	22.8		245.8	0.3	-2.7	3.6	10.2	-4.4
7.5		137.5	-0.7	152.6		-1.8	-0.8	1.9	-4.8	10.6	-2.3
52.8		119.9	2.4	-0.2		151.1	2.8	5.2	-4.2	60.6	18.6
41.8		90.3	1.5	157.8		13.2	-2	3.2	-4.3	11.8	-4.5
31.4		173.4	9.8	103.2			8.6	7.7	-9.4	-1.3	-1.6
1.8		90.5	3	97.8		1.7	40.2	99.5	0.9	8.8	-3.6
81.3		137.3	96.8			28.2	18.4	1.8	67	-4.7	-6.2
20.5		194.3	-4.3	-5.3		66.8	-46.3	2.2	30.6	47.2
11.5		183.9	1.4	14.3		49.4	39.6	-2.5	89.3	1.2
-0.7		0	-3.3	0.4		2.8	25.5	-5.9	16.9	-0.1
46.8		5.2	-6.4	-1.6		112.3	0.1	27.8	42.4	2.2
44.9		175.8	0.6	3.2		2	3.8		-30.1	17.2
7.2		89.6	-1.2	20.7		65	-11.1	63.2	-123.9	-1.4
24.1		3.7	-2.7	11.6		59.9	-7.7	42.5	-26.5	0.9
60.7		-0.7	13.9	26.2		106.2	7.9	8.6	12.1	-3.8
32.2		595.4	32.8	0.9		63.1	-1.1	61.3		111.1
39.9		164	40.9	-1.9		37.6	-2.1	36.6	60.8	0.6
3		211.1	37.7	31.9		52.2	3	13.2	29.7	2.2
11.6		6.4	-0.5	14.3		84.7	2.7	37.4	119.2	3.9
3		160.2	-0.3	25.8		48	12.3	23.3	97
52.8		112.8	12.1	29.9		64.7	-10.3	88.6	101.1	-3.8
24.7		119.3	6.1	31.9		97.9	11.7	14.5	89.4	5.7
6.6		182.5	0.4	-2.1		-18	11.8	20.3	91.7	40.3
4.4		131.5	1.7	50.1		6.5		17.6	103.1	34.3
-5.2		113.8	-10	22.3		18	4.2	74.2	125.3	33.3
		-6.4	-8.7	39.2		36.4	0.1	17.4	84.4	-6.7
23.2		138.7	2.8	10.2		58.5	0.1	31.5	91.1	12.5
-1.6		3.2	3.9	14.6		94.2	1.4	25.8		52
7.5		-0.6	2.8	41.6		52.5	0		107.5	150.7
55.2		95.3	-2.6	27.7		73.1	-7.7	74.7	45.7	65.6
45.2		104.4	-1.2	48.7		80.4	-7.3	61	90.6	126.2
83.7		116.6	-9.5	21.6		132.3	5.6	-4.1	71.8	12.9
45.8		152.2	22.8	1		2.2	-7.7	75.1	155.6	74.8
13.1		139.1	-1.2	56		-3.1	-1.8	5.2	131.8	68.5
47.2		0.8	2.8	17.6		149.5	-4.5	3.7	14.1	83.3
-4		-0.9	2.2	14.4		-2.5	-5.1	53.7	140.5	125.2
370.3		401.2	54.7	46.8		62.5	-3.3	2.8	60.2	112.7
38.2		224.7	-3.4	30.4		56.3	1.3	8.5	57.8	41.5
100.8		55.4	-0.1	12.7		-3.2	0.6	102.1	93.5	2.8
60.5		-7.7	11.2	6.4		144.8	-5.5	70.5	83.9	91
128.2		62	-7.4	31.4		-7.5	-3.9	79.4	92.2	-7.7
102.6		95.1	-0.3	37.1		91.2	0	-0.4	157.5	-5.5
145.2		17.9	-2.6	-1.9		2.5	-1.9	-1.5		19.2
24.2		93.2	6.9	-3.2		65.1	6.5	103.9	-61.5	65.7
107.3		46	1.2	-3.6		114.2	4	24.2	-56.9	68.2
73.1		106.3	-9.7	9.1		-2.1	-6.3	-0.2	-76.7	71.5
130.9		70.2	-2.3	36.6		170.4	7.1	51.1	-86.1	80.5
-8.9		42.2	-6.4			65.8	6.1	112.6	-16.6	49.3
-3.2		85.9	53.7	-3.1		52.6	24.6	85.6	-3.8	81.3
106.2		89.6	-4.7	35.3		-4.7	157.9	77.5	-83.7	106.3
71.5		3.7	-2.8	11		21.2	-1.7	91.3	-80.3	2.5
48.7		-0.7	4.8	49		88.6	-1.7	97.4	-136.4	37.2
60.5		595.4	-5.4	40.7		-1.5	12.8	68.6	-84.9	2.5
-3.5		164	9.7	28.2		212.9	1	125.2	-108.9	56.2
99.5		138.7	0	68.3		273.1	19.9	103.5	-110.6	66.5
		211.1	7.1	34.1		1	-2.3	90.1	-70.5	-3.5
-2.7		6.4	33.5	43.4		77.9	-7.5	1.9	-20.8	1.9
-1.9		160.2	-8.7	-1.3		2.3	3.3	-7.1	-93	95.6
41.2		112.8	0.5	12.6		74.6	-14	-2.5	-24.2	78.9
80.3		119.3	5.3	28.5		51.6	4.9	5.1	-12.6	4.5
67.2		182.5	38.6	16.4		52.5	-5.8	93.2	-134.1	43.3
6.6		131.5	36.4	18		206.4	-5.3	-3.2	-123.9	89
-2.8		113.8	-6.2	29		163.1	-2.1	117.8	-48.2	2.6
-5.5		-6.4	2.6	35.7		8.9	-6.4		-64.8	-2.7
5.5		3.2	-6	23.3		94.8	9.5	58.5	-68.5	-2.5
34.3		-0.6	-4.2	54.4		5.7	17.3	-4.4	-83.8	-0.7
64.6		95.3	-1.3	28.9		67.5	-13.1	-3.4	-30.2	36
2.7		104.4	-13.7	31.2		136.5	-6.3	54.5	-21.3	140.6
		-3.2	1.3	29.2		10	-10	101.5	-119.7	-6.7
42.4		116.6	9.7	67		-0.5	-4.1	40.5	-177.4	-2.1
-6.2		5.7	-1.3	5.3		142.5	2.9	-2.7	-66.4	75.5
-10.8		152.2	122.6	-0.2		164.5	19.3	-4.6	52.3	4.7
11		139.1	21.2	49		248.5	-0.5	1.8	-71.2	9.1
22.8		0.8	-3.9				155.7	108.4	-64.6	15.8
68.8		-0.9	-16.1	-0.2		14.2	-9.4	6.4	-12.3	29.4
6.8		401.2	-3.7	143		1.9	25.5	54.7	-113.7	52.8
59.1		-7.7	49.8	155.2		68.8	-1.6	19.6	-24	7.5
51.4		62	-5.9	3.8		1.8	-0.8	-6.5	0.7	14.6
-3.1		224.7	30.7	92		90.4	-9.3	69.2	-88.7	114.1
78.8		55.4	-10	-8.8		28	-3.2	75.1		2.5
-1		93.2	-2.8	-1.2		40.5	2.4	1.5	16.2	-4.2
14.1		95.1	10.7	7.7		58.6	-5.7	-5.3	124.4	-3.4
65.8		106.3	-3.5	5.4		66.8	43.9	87.8	-0.4	0
72.7		17.9	-7.7	291.6		131.3	32.8	18.6	15.3	0.4
4.1		46	37.5	-0.1		143.3	-1.2	-3.8	34.4	-3
-1.6		70.2	10.2	222.2		53.9	49.1	10.9	-42.3	-5.2
2.1		42.2	21.2	5.6		38.6	27.8	19.4	38.6	4.2
14.1		8.7	5.2	3.8		58.7	-2	16.6	-2	2.7
24		-0.3	66.3	-6.8		67.5	15.2	26.1	15.2	-2.5
0.4		1.5	-7.4	113.7		51.1	20.8	42.6	20.8	-4.5
51.2		85.9	-5.8	0.8		35.6	-0.9	39.6	-0.9	7.5
59.2		2.1	0.2	179.9		71.3	1.9	12.5	1.9	-9.4
4.4		-3.9	-4.9	142.4		-2	0.7	16.5	0.7	-1
23.6		0.3	-9.5	-3.8		62	-18.6	50.8	-18.6	-3.5
13.4		-2.4	7.4	105.2		66.7	-8.4	-6.2	-8.4	137.1
		-1.2	-2.9	489.7		42	-9.2	13.5	-9.2	-4.2
74.2		-1.4	1.7	195.9		66	-26.7	80.1	-26.7	-5.1
29.2		1.4	-0.9	-12.4		98.5	-9.1	-2.2	-9.1	-6.6
131.4		-3.1	-0.5	206.8		45.4	9	-2.2	9	-3.1
60.8			5.9	-10		26.4	-1.1	12.5	-1.1	-2
37.3		138.7	-2.2	-3.8		55.7	0.6	95.7	0.6	-0.8
6.8		-9.5	5.1	391.1		79.6	55	98.7	55	3.5
-4.5		183.8	0	137.8		40	58.9	21.8	58.9	-8.7
12.9		2.5	4	128.8		36.3	3.8	7.6	3.8	-9.6
8		128.8	-0.1	-6.5		71.8	-8	46.7	-8	6.5
47.7		-0.4	28.8	21.5		110.8	2	4.8	2	31
25		188.6	7.4	-3.9			-37.8	53.5	-37.8	40.2
64.2		94	2.9	-0.7		105.1	6.2	208	6.2
2.1		180.8	8.5	-2.8		-8.5	35.9	69.2	35.9	57.9
45.3		170.3	36.8	6.8		68.3	7	59	7	59.1
-3.2		163.5	-1.2	10.3		124.2	-5.3	-5.1	-5.3	96.4
23.4		90.2	5.5	179.5		1	0.9	50.3	0.9	70.8
28.2		183.9	3.1	131.2		30.5	2.2	-0.2	2.2	20.2
32.9			27.4	120.2		78.3	7.9	57.4	7.9	68.7
39.8		-4	5.7	1.2		108.1	-0.6	0.2	-0.6	57.7
		6.1	18.1	-5.4		134.5	33.2	52.1	33.2	30.8
		30.2	11.5	106.9		60.4	4.8	-0.5	4.8	69.4
		1.2	-1.1	160.2		102	1.9	220.4	1.9	-3.9
		18	5.5	9.8		77.9	-0.6	119.7	-0.6	41.6
		97.6	13.2			145.2	3.6	-3.2	3.6	70
		5.4	-1.2	95.8		108.6	5.6	1	5.6	14.4
		15.8	-1.5	3.6		110.8	95.5	-1	95.5	3.6
		34.8	4	1.9		117.6	1.6	73	1.6	10.4
		-1.7	7.5	57.8		141.3	-2.7	51.5	-2.7	141.6
		31.8	-1.2	256.2		150.2	4	38	4	60.3
		51.7	2.1	272.2		178.4	16.1	2.2	16.1	91
		28.4	-5.6	30.9		173.7	3.9	81.3	3.9	64
		29.2	1.1	291.2		66.6	1.6	26.7	1.6	47.2
		60.5	-0.2	27.1		85.9	10.9	104.2	10.9	38.5
		20.4	2.5	31.9		101.1	-11.1	3.7	-11.1	45.1
		18.2	-7.4	126.3		76.2	2.5	-3.7	2.5	20.9
		49.2	-5	104.9		1	4.2	100.7	4.2	19.6
		41.4	-2.8	171		75.7	1	-2.1	1
		5.9	2.1	72.9		64.3	-0.2	2.2	-0.2	2.9
		53.4	0	121		58.3	1.4	-3.8	1.4	14.9
		49.2	5.6	141.4		51.1	-8	109.8	-8	14.9
		40.1	-4.3	171.8		133.3	1.4	4.8	1.4	15.6
		6.2	78.3	121.2		112.3	0.7		0.7	3.5
		78.9	12.1	59.7				129.8		27.9
		35.9	12	64.4		95.2	-6.8	83.2	-6.8	25.4
		52.3	12	0		87.8	7.9	88.5	7.9	12
		78.4	-8.2	6.2		48.5	17.1	94.1	17.1	29.1
		56.1	111.4	81.7		217.1	0.3	65.4	0.3	23.2
		23	-1.2	132.9		140.5	-3.2	22	-3.2	17.3
		62.3	-22.6	94.9		84.5	9.6	47.7	9.6	33.8
		24.4	10	-0.8		420.7	-1.8	171.5	-1.8	42.8
		27.8	11.2	43.8		64.2	-6.8	25.6	-6.8	8.6
		15.7	-10.6	39.1		107.2	4	120.8	4	22.4
		33	34.3	189.1		177.6	-0.3	40.6	-0.3	31.8
		29.4	8.8	141.1		203.7	-10.1	138.1	-10.1	5.7
		14.2	32.7	51.3		84.5	8.7	88.7	8.7	10.2
		53.2	13.7	129.1		394.4	4.5	437.8	4.5	28.7
		20.5	50.1	104.8		260.8	-4.7	71.2	-4.7	28.7
		53.7	16.7	169.6		120.4	11.8	65.2	11.8	52.2
		5.1	1	62.9		234.5	8.3	99.3	8.3	19.1
		51.3	13	82.6		48.2	-5.9	2.2	-5.9	0
		72.3	30.1			210.7	1.8	39.3	1.8	2.8
		30.8	2.8	57.6		114.5	2.3	110.7	2.3	12.3
		87.8	0	62.5		127.2		156.1		25.9
		14.3	18.1	18.6		208.1	-1.8	52.2	-1.8	7
		73.1	0.2	54.8		161.8	0	59.2	0	22.6
		60.9	-1	47.3		97.7	-8.6	159	-8.6	3.1
		56.1	3.6	16.7		107.7	2.6	88.8	2.6	0.7
		35.2	-3.3	88.7		96.7	-2.6	48.9	-2.6	35.6
		77.7	1.9	108.8		118.9	-8.9	51	-8.9	0
		-1.7	3.7	54		212.7	6	97	6	3.7
		-0.1	3.3	75.4		66.9	-16.8	87.6	-16.8	54.6
		55.3	-10.7	11.5		55.1	-0.7	71.3	-0.7	37.5
		24.2	-4.7	-14.9		177.2	-1.1	138.3	-1.1	35.4
		-1.9	59.1	43.8		99.5	-3.1	166.7	-3.1	2.3
		47.3	3.8	86.6		163.7	3.3	38.8	3.3	53.9
		44.3	-8.6	66		105.5	60.7	93.3	60.7	1.4
		59	-21.5	60.2			-1.3	1.1	-1.3	40.8
		24.3	15.8	-2		77.9	-1	155.7		39.4
		29.9	42.9	103.5		6.8	18.7	96.1		2.7
		39.6	23.7			72	-1.3	15.5		56.9
		23.2	-22.7			94.6	-1.7	1.4		33.9
		51.2	7			99.3	-3.6	166.3		3.6
		35	-0.5			82.2	12.6	42.1		24
		36.1	-0.2			63.9	-3.9	21.6		-4.7
		382.1	-22.5			243.6	2.7			0
		479.9	17.6			96.7	-4.9	-0.9		3
		175.6	24			8.6	-0.8	17.9		-1.7
		45.5	7.1			104.8	3.2	35.7
		-59.4	3.6			4.8	-4.2	62.6		183.1
		296.4	-13.7			51.8	-10	99.5		76.1
		490.8	15			42.7	0.7	-8.9		129.4
		-40.9	12.1			50.4	2.7	20.2		68.1
		232.5	2.6			77.3	9.8	75.3		31
		205.8	46.8			83.7	-4.3	-0.1		59.9
		402.4	-9.8			67.8	1	53.8		18.2
		733.2	24.2			10.6	-4.2	22.6		37.9
		218.2	27.5			41.1	0.2	53.6		21.9
		-28.7	16.2			47.1	-0.2	61.8		42.8
			-0.4			66.8	2.2	-0.8
		732.5	-0.5			87	1.2	88.2
		1249.8	4.1			63.2	-2.8	50
		834	19.4			91.4	-1.5	34.9
		3113.2	-2.1			102.6	-0.2	37.3
		681.4	-6.3			-1.6	-1.3	-6.5
		656.2	38.1			72.2	2.2	19.8
		3037	5.9			5.2	-2.6	43.4
		777.6	-0.3			61.7	-4.4
		1641.5	13			54	-1.7	36
		3167.2	-1.7			233.4	5.7	57.6
		2127.1	2.9			3.4	8.3	65.6
		3329.8	5.6			25.1	2.6	55.1
		2423.8	-3.7			125.8	-2.1	4.1
		3404	0.2			92.7	-5.6	15.9
		3237.4	0			100.3	-1.3	9.4
		1835.3	-4.4			41.6	-0.2	49.7
		3076.1	-7.2			41.1	2.3	51.4
		3144.9	1.6			13.2	-0.2	38
		2898.9	1.3			59.1	4.3	31.1
		3310.2	-2.4			41.2	0.2	36.5
		916.1	-0.3			149	3.7	59.3
		2353	-2.7			58.2	-4.4	12.6
		3124.7	-4.6			5.4	-14.4	22.5
		3406.2	-3.5			5	3.6	41.5
		3232.4	0.3			53.7	1.4	63
		3317.3	-7.6			14.5	2.6	-3
		3593.8	0.8			75.7	2.1	40.5
		3292	6.7			65.6	0.7	4.9
		3811.9	1.6			-9.5	1.9	76.5
		2514	3.1			21.4	-1.8	99.7
		778.6	2.3			47.9	-2.2	0.6
		3786.1	-1.9			168.7	5.3	-2.8
		3398.3	-0.5			211.7	-0.8	79.7
		1012.1	-3.7			-6	-7.1	148.6
		496.8	1.2			-1.3	1.9	13.8
		2507.5	1.7			30.4	1.7	25.5
		774.1	1.1			-3.9	-3.7	0.6
		1345.4	-2.9			109	-2.4	-1.2
		2760	6			30.5	5.6
		587.2	0.7			41.1	0.8	3.6
		828.2	2.3			6.7	4.2	91.2
		1039.1	2.7			37	-5.5	-6.7
		768.5	3.3			48.6	6.8	230.5
		346.1	2.1			82	-0.3	95.1
		309.8	31.7			40.3	3.2	138.3
		0	-0.6			99.3	-1	94
		-39.1	0.7			8.7	11.6	268.9
		-21.7	-12.4			12.1	2.9	258.2
		-15.2	2.6			98.1	9.5	47.8
		-14.9	0			-31.9	-3.7	123.4
		-16.6	25.3			125.7	-4.1	201.1
		-16.4	20			20.6	0.9	56
		-11.5	1.4			74.7	1.4	133.3
		0.9	-4.1			56	4.9	94.5
		-10.4	7.4			88.3	-5.7	66.6
		20.4	-2.1			63.7	-3.3	129.3
		-15.7	6			25.1	-1.4	97.2
		15.4	2.6			2.1	5	166.4
		70.5	3.4			81.4	-0.5	160.3
		-59.9	-7.4			37.5	-2.1	149.1
		0.9	2.7			51.3	-1.4	174.2
		35	3.6			26.6	-2.9	66.2
		101.2	0.6			-2.9	-3	117.8
		82.4	-0.2			123.9	1	150.2
		5.5	0			109.6	6.9	126.9
		175.1	2.1			45.5	1	49.1
		116	14.6			86.1	52.3	-2
		180.2	19.4			15.3	-8
		152.4	2.9			34.8	-2.1	5.8
		-23.1	-1.7			-1.3	11.7	77.6
		0.6	0.1			61.9	2.2	47.3
		130.8	3.4			81.2	-2.6	21.1
		196.7	1.8			16.9	1.3	9.6
		118.8	0			8.3	3.2	-2.4
		18.8	5.6			107.7	-3.9	67.1
		-22.1	-6.2			2.3	-0.7	13.9
		183.6	-5.7			33.4	5.7	17
		17.2	-8.8			45.5	-0.6	31.5
		-19.1	-4.4			99.3	0.1	47.1
		54.6	6.9			4.8	15.7	4
		95	6.1			54.6	4.8	1
		-124.4	-6.3			22.1	0.9	26.2
		-100.6	-23.9			37.8	-1.6	-3.8
		139	-8.8			91.8	1.6	-2.8
		178.6	-0.7			27.9	1.5	37.2
		62.5	0.5			5.3	5.6	23.3
		-2.6	22.7			47	-2.1	12.5
		87.1	19.6			40.6	-2	44.3
		120.8	-7.9			1.3	-0.9	2.7
		-13.9	-15.5			0.3	1.4	31.6
		37.9	0				-2.4	4.1
		23	-4.5			0.5	16	134.4
		191.3	0.4			137.4	11.7	1.2
		5.3	-5.2			97.6	3.8	1.5
		-14.5	4.6			121.8	7.1	-5.8
		124.4	10.6			57.4	27.3	3.6
		144.8	4.2			31.7	7.3	31.2
		140.8	-4.6			88.7	-0.7
		111.1	-9.5			39.4	0.4	125.4
		-14.6	-3.9			32.2	-3.8	263.2
		-6.1	-5.6			32.1	5.9	3.6
		-0.8	4.7			46.2	-2.4	2.5
		97.1	21.8			44	0.9	-5.5
		-56.7	-12.5			46.2	22.7	1.7
		7.1	-0.2			48.3	-7.3	84.8
		16.1	32.6			90.8	15.6	-11.5
		33	8.4			8.4	5.3	-7.3
		49.4	-3.9			69.3	2	72.3
		26.5	1.7			18	-0.9	146.8
		12.2	-1.6			53.4	-0.1	21.7
		-6.9	-3.4			48.7	8.8	137.4
		-1.9	21.7			1.9	6.3	78
		-2.2	-0.4			20.6	0.4	57.6
			-27.9			24.3	3.9	15.1
		-20	-2.7			25.3	0.4	-6.8
		-23	-5.7			55.2	4.7	52.9
		9.6	2.7			8.4	-5.1	161.2
		-3.3	-6.2			9.7	-4.3	216.3
		71.1	-7.4			47.3	-5.2	301.7
		84.6	59.4			72.1	5	159
		18.6	-9.4				-2.5	147
		35.4	76			102	23.1
		124.8	2.2			85	3	0.2
		144	45.8			108.1	0	48.9
		135.8	-2.4			169.3	0.9	238.9
		101.8	-30.4			127.5	2.1	-1
		54.7	-19.2			154.2	-1.1	-3.7
		42.5	20.2			92.1	-1.9	5.6
		171.1	-20.1			266.5	-3	-1.7
		267.6	-23.8			222	-1.3	26.1
		172.6	-5			152.8	9.1	29.2
		75.7	20.8			146.5	-3.5	63.7
		-28.1	-6.3			26.5	-6.1	9.2
			-9.5			34.5	11.6	0.9
		-53.2	42.8			22.2	44.7	31.8
		-41	-2.2			48.6	-2.8	75.4
		-66.5	73.4			129.2	1.5	34.6
		-171.4	-11.8			5.4	-0.3	75
		-52.8	19.2			23.9	3	45.2
		-4.5	8			78	7.8	2.1
		-58.2	-2.4			49.1	13.6	19.7
		-91.6	-28.7			131.2	1.7	36.1
		-34	25			-0.5	-0.7	27.7
		-1.1	-12.4			99	-4.6	59.7
		2.1	-18.8			241	2.6
		-12.7	-4			-8	3.1	5
		-44.6	49.6			214.5	-3.4	211.5
		-8.9	21			6.5	3.6	2.3
		-2.9	-5			-4.2	3.5	119.4
		12.4	1.4			25.6	-2.8	65.5
		36.5	5.6			25.7	-3.3	8.4
		-29.2	-7.8			-0.2	9	61.4
		64.5	-2.3			57.3	-1	102.8
		35.1	-8			81	-1.5	109.1
		2.7	-5			-2.7	-3.4	111.8
		-796.9	0.5			73.4	23.1	1.4
		-30	-2.8			72.2	4.3	127.5
		50.1	105.5			39.5	-3.2	87.1
		-65.5	14			3.2	-1.3	148.7
		-44.9	-29.2			9	-0.2	72.2
		-23	2.9			15.8	7.7	113.1
		74.9	10.9			49.5	2.6	8.3
		33.2	-21.8			2.1	3	64.1
		19	19.1			2.4	5.2	131.2
		9.3	0.1			5	5.7	151.5
		72.6	56.1			62.5	0.2	-4.1
		87.4	19.7			-6	0.4	2.6
		119.4	-42.1			122.3	31.4	-2.9
		36.3	-4.9			12	0.6	-5.3
		-46	5.7			59.6	-6	22.3
		27.1	1.6			3.3	9.1	-21.1
		26.4	8.1			9	3.2	31.7
		-199.2	2.8			-0.2	2.3	1.1
		162	110.2			5.3	1.2	9.6
		261.3	-13			2.6	-0.8	22.2
		240.4	20.7			0.2	2.4	119.3
		148	-3.9			13.8	-2.1	4.8
		76	0.9			-7.8	-0.1	2.6
		44.7	21.9			3.5	-0.8	152.2
		319.1	-1.8			82.5	11.5	117.1
		356.7	59.8			-6.7	-0.9	4.5
		-43.6	-2.8			78.5	10.9	4.6
		-18	5.1			-2.1	3
		10.1	-4.4			15.3	-2.4	-5.8
		243.3	16.8			14.3	12.1	57.3
		258.1	154.9			4.7	-0.5	7.2
		185	3.1			-6	1	103.1
		199.9	-0.2			42.8	4.4	1.6
		279.5	12.3			3.9	-8.6	131.4
		449.2	-9.7			-5.6	-4.5	122.6
		384.2	-5.7			53.2	4.2	71.5
		202.5	1.5			55.5	2.1	-6.2
		228.9	-7			-5.8	-0.8	70.8
		162.7	-14			-6.7	1.8	29.2
		-10.8	1			23.2	-0.3	156.2
		-29.4	3			21.6	13.3	-3.5
		7	0.9			22.2	3	78.5
		271.4	3.8			36.5	1.9	89.2
		132.1	2.8			-15.3	2.8	-9.8
		394.4	10.4			12.6	3.1	-1.9
		363.5	3.4			0.9	2	76.5
		356.5	1.9			-10.4	2	104.4
		473.5	9.5			-0.3	0.7	0.8
		802.2	-6.4			-0.2	11.8	-1
		454	57			28.5	6.2	2.5
		390	-7.8			101.5	-1.2	44.2
		290.1	-2.4			12	-0.3	-0.5
		38	27.3			0.6	-3	37.1
		-21.6	0.4			16.1	-2.3	47.5
		111.4	-3.1			0.8	3.2	-4.2
		638	2.1			17.8	-2.4	-3.2
		984.7	-3.4			10.8	-1.7	72.5
		662.8	1.6			6.6	1	-1.8
		463.7	6.3			24	-8.4	73.5
		69.6	-0.8			-5.1	-0.4	105.5
		239.8	137.3			46.8	-7.2	-3.8
		702	228.1			28.5	-2.6	141.4
		1068.1	393.9			-10.8	3.9	25.6
		-29.1	-2.8			10.1	1	0.5
		-377.3	9.8			4.8	4.2	52.5
		-24.7	-9.5			6.1	-4.1	7.7
		142.2	63.4			67.9	-4.1	-3.8
		258.6	142			6.3	-1.1	5.9
		239.6	336			0.5	8.8	9.4
		800.3	693.4			1.1	0.6	122.5
		136.9	95.8			4.2	-6.6	0.3
		639.6	587.2			4.3	0.8	3
		-12.9	-227.9			59.8	0.5	-2.5
		574.8	173.8			7.1	0.1	3.7
		221.3	285.6			7.7	-1.4	35.2
		12.5	161.4			17.8	-0.7	2.9
		129.9	34.9			2.2	5
		457.3	148.9			140.6	-2.9	70.4
		636.1	432.6			-3.3	3	83.1
		616.1	751.4			3.6	1.8	113.9
		603.7	737			7.3	-1.4	52.1
		27.6	124.1			37.6	1.6	102.4
		-6.7	-74.7			-7.2	0.6	-3.2
		149.1	81.2			69.8	3.3	90.4
		557.4	731.1			27.4	4.4	5.4
		118.3	404.5			9.2	-3.4	113.8
		27.9	-81.9			2.8	6.8	1.7
		43.6	66.6			58.8	3.4	-2
		524.7	275.4			6.2	4.5
		124.5	202.4			24	3.9
		97.4	201.6			-4.5	-0.8
		143.6	199.6			8.5	-0.4
		96	90			6.6	-0.1
		144.4	24.3			-2.9	18
		379.7	199.7			4.6	2.3
		-180.9	219.1			7	2.3
		2	96.2			5.8	1.3
		94.2	66.7			-17.8	3.4
		135.4	69.4			-10.1	2.4
		133	188.4			-4.5	20.1
		119.9	174.2			-6.6	6.3
		57	163.1			2	-4.6
		27.1	110.9			10.8	6.3
		16.7	-47.6			62.1	-3.3
		135.1	146.4			37.8	2.6
		53.1	146.2			54.7
		17.7	136			19.6	4.6
		-19.2	30.9			-0.4	-2.2
		-25.1	7.2			-1.1	-6
		78.9	12.2			-3	13.3
		17.6	87.3			-0.1	7.4
		-5.8	28			73.2	-3.9
		90.9	65.6			20	14.2
		181	110.9			8.5	1.4
		-6.3	82.5			42.9	4.2
		72.1	113.3			89.2	-2.7
		128.1	176.1			79.2	-1.7
		-0.7	141.6			35.8	-1
		-0.3	29			53.7	3.8
		111.7	119.5			32.4	-9
		-8.7	5.4			3.7	0.7
		-16.5	35.9			39.8	-7.2
		47.5	67.2			46.8	-2.3
		16.3	102.7			26.2	7.3
		43.7	11			74.3
		44.6	116.2			-3.4	-5
		-11	99.6			24.2	6
		-29.9	69.2			0	6.4
		-50.8	132.3			32.1	7
		23.3	85.7			53.4	0.4
		-182.4	75.9			22.6	-4.5
		-18	-106			39.2	74.4
		-4.9	31.6			16.3	-1.6
		10.8	81.4			-2.4	12.9
		14	56.7			5.5	-5.5
		-156.7	69.9			52.1	-9.7
		2.2	39.9			38.3	8.5
		6.4	-24.2			17.2	-8.2
		18	43.7			44.3	0.8
		-2.8	-17.1			0.9	21.4
		7.7	57.1			20.7	-6.9
		-7.3	-1.4			43.4	3.4
		-5.8	27.2			-5.2	8.2
		-2.4	46.7			-9.6	15.5
		-0.1	45.4			16	9
		-13.2	74.8			53.4	6.9
		-41	18.6			41.7	26.6
		-17.2	21.6			-1.5	-3.9
		-58.5	52.5			7.8	-0.6
		-41.9	71.3			24.8	1.1
		-23.9	59.2			-1.8	-3
		-12.6	58.7			0.5	-3.6
		-13.2	61.9			-6.7	5.9
		-9.4	38			8.5	6.8
		-20.6	89.4			0.9	10.6
						20.6	-4.8
		69.8	149.4			9.8	1.4
		39.2	144.6			-13.2	13.4
		33	141.1			3.2	23.5
		3.1	119.1			90.9	21.7
		160	179			46.2	3.2
		-7.8	100.6			39.8	-6.3
		-157	158.2			22.2	3.4
		203.9	200.3			0.8	-12.1
		212	228.6			2.5	19.2
		241.1	225.8			389.8	3.5
		251.5	232.7			14.9	4.7
		112	266.3			54.5	-0.9
		153.4	166.4			54.1	-0.3
		89.4	144.2			-0.9	9.4
		152.3	212.4			43.7	4.1
		0				-2.9	3.2
		-10.4	135.2			58	-6.8
		-14.9	128.1			5.8	5
		-17.9	122.9			83.4	-4
		-11	127.2			-11	-7.8
		-15.6	128.7			16.4	-0.2
		9.4	156.3			14.2	-9.2
		-32.1	145.4			35.8	9.7
		-23.2	130.9			32.8	48.7
		-11.8	88			21.4	-1.4
		36	204.3			9.5	2.5
		20.4	167.7			14.3	-7.9
		-14.4	117.7			30.3	-1.5
		11.1	155.6			26.9	-14
		60.6	210.6			36.2	-18.3
		50.2	200.2			52.5	8.7
		38.5	189.9			52.4	-3.8
		-2	156.1			78.8	-3.3
		46.4	170.7			37.1	-3.7
		35.2	168.3			21.8	7.4
		41.6	170.7			24.5	6.4
		187.6	292			9.8	-2.6
		99.3	234.7			-6.2	6.4
		18.5	182.4			59.3	-3.2
		148.8	211.9			3.7
		234.2	294.7			80.3	0.5
		134.5	210			-5.4	24.5
		47.6	177.4			21.2	30.6
		11.5	149.1			38.9	2.7
		22.8	157.2			-0.5	0.8
		277.3	390.8			-7.2	11.6
		81.9	218.6			6.5	-3.9
		267.3	283.5			6.3	3.3
		47.1	205.8			6.7	11.2
		332.2	415.4			4.2	-0.9
		228.2	274.6			42.4	-3
		381.1	451.2			91.7	-1.2
		121.4	236			5.2	7
		32.2	194.9			-7.2	-0.7
		258.8	431.9			79.4	-2.3
		260.6	376.9			5	0.2
		24.4	159.3			-0.5	1.9
		272.5	470.3			2.6	5.6
		40.1	169.4			21.5	-2.2
		309	457.2			6.3	3.7
		264.6	382.9			23.6	-5.6
		11.3	185.8			7.6	1.4
		284.4	451.5			-0.5	-4.6
		257.1	471.4			81.1	0.5
		202.1	342.9			49.8	-0.2
		146.6	264.9			-6.8	3.8
		393.9	287.4			53.5	-0.9
		421.1	381.3			12.6	-3.3
		172.9	486.4			0.7	-1.5
		296.9	487.2			37.8	5.4
		301.8	489.1			19.4	5.2
		280.2	465.1			6.1	-7
		273.9	435			-8.9	-2.7
		259.3	434			79.8	3.7
		51.6	164.6			4.1	0.3
		43.7	145.3			0.1	0.9
		313.1	493.2			0.5	-6.2
		53	208.1			18.9	6.8
		447.4	354.6			42.5	15.3
		263.1	401.1			-8.5	-6.9
		237.9	236.9			36.2	1.2
		246.5	428			9.2	-2.4
		230.8	389			-7.4	-9.8
		7.8	128.5			25.1	-1.6
		25.8	173			76.8	-3.2
		144.4	192.3			16.7	-2.3
		236	373			46.2	2.4
		258.8	405.9			3.4	6.3
		232.6	433.1			14.1	1.3
		209.4	358.4			76.8	35.4
		120.7	213.4			90.1	0
		28.6	163.4			26.1	-1.7
		22	143			17.2	7.9
		158	193.2			-2.1	-4.3
		255.7	360.8			8.2	-5.6
		274.4	401.6			1.8	8
		262.9	385			21.5	3
		221.7	359.6			61.4	5.4
		136.4	236.4			94.5	-4.4
		12.2	117.5			-2	8.8
		-24.9	137.5			1.3	-4.8
		-6.2	72.6			24.4	6.3
		220.2	351.5			-0.2	1.4
		219	388.5			45.5	5.8
		187.3	287.1			13.5	1.8
		18.6	140.4			-1.1	-6.9
		-16.9	113.4			-0.4	4.9
		-11.9	95.1			28.5	6.9
		75.3	173			9.2	-2.4
		79.9	185.2			-1.7	1.8
		92.8	160.3			-5.2	1.1
		-18.3	146.3			-1.5	21.4
		-9.3	164.7			47.7	4.5
		42.7	156.2			17.3	3.1
		205.9	359.2			26.7	-1.2
		8.7	134.9			13.3	2.9
		177.6	347.2			47.8	13.7
		139.8	381.1			8	18.8
		176.8	325.4			23.2	-2.5
		56.5	160.1			1	-5
		22.4	143			56.7	241.7
		166.9	269.8			43.9	-5
		153	324.4			37.2
		74.8	253.3			11.5	7
		47.8	156.3			46.6	-1.1
		43	158.9			0.4	19
		126.4	238			6.5	7.2
		157.9	281.1			-1.7	-0.4
		78.3	212.7			2	6.5
		0.6	128.9			96.8	1
		13.2	136.1			-0.1	2.3
		18	153			3.7	-0.4
		30.3	140			3.5	0.4
		-1.8	124.7			1.7	0.9
		17.8	145.9			33.2	2
		-39.4	141.8			42.4	0.6
						74	0.8
						58.9	7.8
						3.9	-1.2
						-7.5	-1.4
						58.8	8.8
						114.2	4.3
						2.8	1.6
						7.1	-2.1
						2.1	5.3
						128.1	10.3
						23.3	-8.1
						42.3	0.9
						1.5	-5.9
						-2.7	-1.5
						172.8	14.2
						-2.5	19.3
						39.2	2.2
						40.1	-2.2
						1.9	34.3
						1.6	4.3
						68.8	-12.2
						39.5	-7.8
						6.2	-4.6
						-1.8	-2.1
						28	-1.4
						28.2	-5.8
						-2.5	1.1
						11.5	-1.9
						12.3	-1.3
						33.6
						-3.4	3.8
						-0.5	7.5
						2.2	6
						16.1	-2.7
						33.5	-8.8
						40.1	17.3
						2.3	-4.1
						-6.4	-5.9
						13.1	3.2
						32.4	-1.2
						77.6	3.3
						28.9	-7.1
						21.5	-5
						27.5	75.6
						18.8	12.3
						41.8	1.2
						46.2	-2
						26.4	94.8
						38.2	-6.5
						17.2	-2.2
						16.6	-6.2
						-2.3	1.5
						26	-2.8
						8.8	2.6
						51	-0.5
						26.1
						115.2
						33
						70.5
						60
						154.8
						3.1
						111.8
						130.8
						144.3
						165.8
						132.8
						-4.2
						64.5
						131.4
						53.6
						248.2
						73.9
						4.6
						65.8
						72.5
						185.2
						33.2
						62.2
						3.9
						285.1
						-12.4
						178.6
						24.6
						60.2
						-6
						-2
						91.3
						104.4
						-6.8
						0.8
						111.3
						101.5
						1.7
						7.5
						-0.7
						11.8
						8.3
						6.9
						-9
						4.8
						-2.3
						9.6
						108.8
						2
						13.3
						4.1
						-3.2
						26.1
						62.8
						-3.1
						16.4
						3.8
						24.8
						10.2
						77.3
						-9.1
						0.7
						2.4
						-7.3
						112.9
						-3
						2.1
						64
						2.8
						32.6
						75.4
						120.8
						3.2
						46.8
						80.9
						46.8
						46.4
						37.7
						50.9
						14.7
						369.4
						-4.2
						180.3
						17.2
						28.5
						3.6
						5.8
						91.6
						-4.8
						8.5
						79.7
						115.4
						-0.2
						159.6
						198.3
						239.8
						63.5
						187.8
						132.7
						16.8
						0
						83.1
						3.2
						6.4
						37.8
						89.1
						3.8
						-8
						109.4
						-9.9
						-4.4
						0.2
						157
						300.1
						2.2
						5.4
						3.8
						-3.1
						4.7
						3.5
						-0.6
						-2.2
						-5.9
						-3.8
						152.8
						11.9
						2.5
						0.1
						0.9
						-2.2
						1
						-1.4
						-4.4
						5.4
						-0.3
						0.2
						2.3
						2.7
						1.1
						-3.6
						4.3
						2.5
						5.5
						2.7
						-3.3
						1.2
						-13.8
						19.5
						-2.7
						-3.6
						-5.9
						253.3
						54.9
						3.1
						17.8
						7.2
						-0.5
						-1.9
						136.5
						140.5
						-3.5
						18.5
						4.2
						24.7
						7.1
						161.6
						21.5
						-0.7
						155.9
						5.2
						72.5
						-1.6
						22.5
						52
						17.8
						-7.2
						44.5
						120.7
						-4.1
						156.9
						1.5
						4.8
						-5.5
						-1.7
						92.3
						22.8
						4.2
						170.5
						44.8
						1.8
						17.3
						242.8
						24.2
						4.2
						1.5
						-7.4
						3.5
						3.1
						-2.3
						11.2
						9.5
						1.8
						-0.3
						-4.5
						40.4
						32
						101.1
						0.3
						3.5
						-3.8
						0.5
						-0.9
						-0.8
						-1.3
						438.8
						2.7
						62.5
						2.8
						-7.2
						156.3
						1
						-0.2
						2.7
						4.6
						194.7
						5.8
						0.8
						-2.2
						5.8
						1.5
						362.8
						-5.8
						1.3
						11.7
						3
						-4.5
						241.5
						292.2
						-10.3
						-3.1
						11.8
						58.2
						59.9
						-8.6
						89.2
						40.3
						67.1
						1.2
						87
						55.8
						-6.6
						63.8
						77.1
						30.4
						83
						67.8
						75.6
						52.6
						103.5
						91.8
						25.4
						27.5
						45.1
						2
						27.5
						58
						28.1
						2.5
						40.6
						93.8
						12.5
						18.4
						44.6
						6.2
						-7.1
						-4.7
						13.9
						58.8
						63.8
						-4.9
						-6.2
						72
						-12.5
						69.1
						23.3
						100.2
						58
						49.2
						-0.8
						54.6
						-3.2
						2.1
						92.3
						47.8
						0
						22.6
						3.8
						75.2
						89.5
						-11
						34.8
						26.4
						5.4
						38.5
						21.2
						76.3
						112.8
						32.1
						-0.5
						65.6
						5
						43.8
						0.2
						3.5
						1
						6.5
						52.2
						43.9
						54.2
						39.1
						-6.7
						69.3
						181.9
						5.5
						54.8
						125.9
						89.5
						176.1
						124.2
						129.7
						98.3
						68.6
						3.3
						125.5
						154.8
						131.2
						6.8
						75.6
						-1.2
						130.5
						29.8
						88.3
						144.3
						62.5
						48.5
						210.3
						66.7
						68
						76

## Sheet: Syk-Repeat 2
Intensity at 72-ligand origami (co-plated with 36-ligand origami	Intensity at 36-ligand origami	Intensity at 72-ligand origami (co-plated with 16-ligand origami	Intensity at 16-ligand origami	Intensity at 72-ligand origami (co-plated with 8-ligand origami	Intensity at 8-ligand origami	Intensity at 72-ligand origami (co-plated with 4-ligand origami	Intensity at 4-ligand origami	Intensity at 72-ligand origami (co-plated with 2-ligand origami	Intensity at 2-ligand origami	Intensity at 72-ligand origami (co-plated with 0-ligand origami	Intensity at 0-ligand origami
-11.2	13.7	6.5	140.4	911.5	-5.2	-3.4	5.6	267.5	41.7	241.7	-9.1
328.2	27.1	593	480.2	439.8	-4.5	7.2	-19.3	200.2	-13.1	311.7	89.2
289.5	201.1	372.5	172.1	-116.3	9.5	-8.8	-8	364.5	193.2	341.8	11.3
242.6	1113.3	553.8	5.2	484.8	31.2	99.4	1.6	88.5	1.5	207.2	36.2
417.5	-250.4	223.3	9.5	540.3	287.6	-0.6	13.2	121.9	3.7	358.3	-12.5
-8.2	567.4	-18.3	25.6	640.1	274.7	246.4	17.8	147.6	87.6	373.8	-19.5
74.3	605.2	504.7	7.1	661.9	406.7	-2.5	9.2	227.5	-13.9	-4.6	-3.7
1129.2	341.9	3.5	116.2	349.1	25.3	193.2	9.5	364.5	0.8	432.5	-2.7
-121.9	316.8	620.8	1.9	-47.6	143.2	-0.4	9.2	-8.6	5.1	360.4	-4.5
108.8	204.8	-12.2	0.3	552.8	214.3	109.8	3.3	29.5	-31.2	237.6	60.9
1765.2	992.5	604.2	101.8	722.6	122.1	298.7	-6	360.8	6.9	150.4	4
341.9	1016.5	11.2	29.3	0.2	182.8	133.3	-1.1	428.8	0.6	170.8	1.1
226.2	847.8	-40.2	9.8	30.8	96.8	133.9	22.8	195.6	0.3	-5.9	2.9
239.4	598.3	3.7	28.5	207.1	194.1	-14.2	12.3	205.7	-0.7	15.5	-13.2
181.2	633.5	7	100	302.8	71.7	159.4	0	254	6.2	389.8	8.8
-524.1	94.9	-5.6	8	-42.8	-13.2	339.3	3.1	-25.5	15.2	2.4	-9.7
-271.2	501.7	4.2	-1.2	818.5	-111.6	2.2	-6.9	239.5	48.7	3.8	55.8
1737.2	964.2	558.7	4	366.3	61.6	21.1	-5.8	23.8	4.4	123.7	-5.8
294.2	36.8	15.3	5.2	276.5	-16.9	322.6	18.7	121.7	5.7	358.4	0.2
897.2	1040.8	-16	-8.6	22.4	-177	168.2	7.8	145.6	-44.2	8.7	-12
-1.8	371.2	-11.4	7.7	667.7	53.2	191.7		151.5	-19.2	-17.3	4.8
569.9	919.5	-4.4	-13	293.4	30.8	255.2	0.6	188.1	-2.5	58.1	-7.5
952.4	57.2	14.3	73.2	513	21.8	103.8	-7.2	339.2	17.2	470.5	14.8
567.7	472.3	236.1	-3	894.8	18.5	301	82.2	217.6	3.5	15.2	12.9
964	562.8	167.4	5.7	664.5	137.3	194.8	16.5	91.8	6.1	305.8	2.5
84.9	941	226	145.6	590.2	67.5	45.7	101.2	135	-3.9	410.8	44.9
1265.2	-422	214.6	4.5	697.3	90.8	10.8	93.4	111.2	4.5	-20.5	69.1
681.4	834.8	2.9	0.3	96.2	517.3	193.6	95.9	133.2	-3.6	15.2	136.7
536.2	98.7	371.4	13.2	1011.9	-135.8	-7.6	3.1	190.5	21.2	-9.6	27.1
621.8	704.5	-7.7	3.5	151.1	-122.2	-6	20.3	488.7	10.5	30.8	-23.2
1413	-14.8	-9.3	577.3	428.3	568.8	231.1	16.7	271	-4.7	69	-7.5
-82.8	-7.2	14.9	101.8	22.6	185.5	517.7	14	-4.7	-1.5	59.6	-22.1
141.8	1.5	0.5	-8.8	252.3	-107.5	243.6	-45.5	-129.6	-2.1	1.7	167.5
534.9	121.8	5.8	99.4	220	-30.7	82.8	24.1	198.8	0	91	-13.8
635.2	25.3	-2.4	60.9	12.3	111.7	180.1	69.8	161.5	-4.5	30.1	-15.8
93.1		-14.2	-7.6	-8.1	46.4	312.3	55.2	314.2	6.3	-3.8	-6.8
750.8	-0.3	0.9	-12	537.5	216.8	212.5	11.3	3.5	4.7	12.2	-7.8
1026.4	6.8	-0.9	-7.5	703.6	95.8	340.5	51.9	100.7	2.4	300	-4.2
725.6	11.1	10.4	-3.1	360.7	-45.2	182.5	0.2	14.5	0.8	4.8	-7.3
1171.2	2.3	2.1	18.5	310	-6.2	203.8	9.5	6.4	-3.4	178.7	6.8
662.2	-6.9	386.5	125.2	-5.8	-28.7	217.9	83.9	78.5	2	-1	1.1
-105.1	1.6	168.2	69.2	111.9	590.5	-3.5	59.2	114.2	-2.8	-12.8	-8.8
581.2	4.6	193.2	10.4	6.2	96.1	190.6	4.6	8.4	-2.5	1.8	0
1394.5	506.3	24.8	28.6	459.9	66.2	6.6	-7.9	170.6	-4.1	31.8	-1.2
1205.2	183.6	279.2	-9.9	296.2	290.7	244.5	24.8	107.7	20.5	33.2	-1.5
520.3	-3.2	419.8	-9.6	72.1	391.5	-4.6	12.6		251	16	9.3
922.6	8.7	254.6	257.5	189.2	402.6	92.7	4.4	266.6	36.9	12.2	0.1
-46.2	10.6	356	256.7	954.8	153.8	397.8	10.5	227	9.8	152.5	1.6
-12.8	327.4	363.5	-24.1	372.5	-114.2	-2.1	5.4	-1.2	9.1	1.6	2.7
-9.2	-4.9	770.5	-12.8	214.1	19.2	51.5	8.1	26.8	200.8	-1.1	-0.2
41.3	9.9	416.2	92.6	197.2	16.8	112.8	5.7	62.6	-20.7	33.5	-9.8
335.8	-5.9	100.8	74.3	229	550	189.8	13.4	2.6	-2	183.2	6
410.2	8.2	10.7	-7.2	213.8	204.2	413.6		82	1.1	48.4	15.9
176.3	17.7	283.9	100.6	584.8	1.3		8.9	-0.5	-0.5	-18.3	9.3
400.2	5.1	222.8	179.2	204.2	-21.9	3.9	6.8	-13.1	63.8	20.4	7
16.5	-13.6	-17.2	184.2	661.5	72.5	-14.2	9.8	209.8	8.9	854.2	0.5
	8	348.5	1.1	593.3	412.2	351.2	-11.5	181.2	-22.4	207.8	-17.9
1.2	1.2	-15	254.2	330.2	247.2	-15.3	14.2	77.9	-18	178.8	-198.3
-0.8	-7.2	-2.5	0.3	57.9	381.8	475.1	109.1	67.5	7.2	182.8	65.8
1.5	5.9	148	-27	1672.2	-224.3	183.7	-0.6	-2.6	-16	4.4	1.8
-10	0	3.9	61.8	534.4	-12.1	449	4.5	0.8	37.3	259.8	1.3
3.5	1.7	-1.3	17.9	243.3	2.3	404.1	7.6	50.8	-14.5	198.3	-0.2
-6.6	1.8	-10.4	117	466.9	8.2	1040.4	0.2	174.5	-46.7	253.2	0
9.1	9.5	-2.1	6.5	424.9	-199	145.9	-1.5	-66.5	0.8	-16.8	-1.5
5.8	4.1	242.3	70.9	512.7	352.2	24.3	-15.2	35.8	-2.3	22.8	0.8
-1.8	1.2		62.3	123.9	-137.5	322.1	-3.8	18.5	-48.8	-10.8	38.6
-11.6	2.3	419	44.3	261.5	330.5	145	17.8	91.8	1.8	6.3	-160.3
2.9	111.5	222	-11.6	386.5	-37.2	4.9	0.4	-9.5	-3.3	104.8	-9.5
480.3	-20.2	77.8	242.5	379.6	27.5	-50.1	-21	89.3	18.7	42.3	-3.2
-2.5	2.9	364.9	4.6	366.5	422.5	115	-1.8	1	1.5	-50	-3.6
7.9	145.4	173.2	127.6	86.8	591.9	148	6.3	1.8	-7.5	-12.4	13.6
4.3	-3.3	-15.6	-24.2	529.6	14.1	-18.1		228.8	31.5	0.4	-18.9
727.5	-8.4	-9.3	261.3	775.7	746.4	253.7	-13.2	24.4	-8.6	135.8	-8.1
582.6	5.6	-2.2	7.5	131.5	146	257.9	-2.5	113	5.7	155.8	-6.5
973.5	9	12.5	50.9	539.5	62.9	126.4	20.1	64.8	-4.5	164.3	10.7
-1.3	3	-1.8	132.8	-37.2	62.4	126.9	-16.8	101.9	14.4	0	0
96	5.2	20.4	138.8	193.2	123.9	54.7	3.6	124.2	81.3	-9.8	2.6
-0.1	0.6	18.5	1.8	-21	396.5	190.4	4.6	36.5	-17.4	172.5	7.5
-0.5	174.2	-4.7	-2.4	268.5	105.8	95.5	1.6	20.9	6.5	31.3	-5.5
636.2	4.9	-2.9	22.7	83.5	7.4	174.4	-8.7	371.9	185.2	58.6	8.2
-13.1	-4.3	498.8	118.1	367.8	-1.6	193.5	-7.2	248	21.4	65.8	5.8
-5.2	-7.8	-55.8	-1	180.3	178.9	-19.8	8.1	70.3	-19.7	126.2	-19.2
19.3	-1.8	7.4	43.2	392.1	45.5	377.1	-14.8	-1.8	87.1	117.8	-4.5
1.2	0.9	7.7	11	639.8	165.7	1.2	0.4	269.5	-6.8	229.8	1.5
-9.9	3.1	99.8	-8.5	295.2	300.8	125.8	18.2	216.9	18.7	-11.4	4.5
3.1	-17.7	-14.8		3456.9	169.2	98.4	5.4	246.8	-13.2	180.8	-3.8
-4.8	-9.8	749.7	254.6	389	425.3	3.8	1.1	-6.5	160.9	33	0.9
5.6	8.3	41.9	261.2	26.9	224.7	-128.1	1.1	30.5	14.1	5	-2.5
-0.8	171.5	8.5	59.5	379.8	-49.2	-48.5	-2.8	29.2	-10.2	178.4	9.2
-4.2	-3.9	200.4	216.1	105.8	-24	187.9	32.2	7.6	17.8	183.2	2.5
-10	-7.9	-22.2	16.3	455.5	232.7	273.8	3.7	125.2	78.2	143.5	23.1
-1.8	-2.8	0.2	442.1	35.5	47.8	118.6	-5.1	3.2	-4.9	1.8	-12.8
-14.7		368.2	34.6	-67.9	100.4	226.6	3.1	197.5	12.2	70.2	-11.1
3.8	1	260.5	-14.6	327.1	-36.8	41.2	65.6	108.5	12.2	53.7	-14.2
9.5	182.3	278.2	164.5	313.6	169.3	122.9	15.4	23.8	-4.5	200.1	4.7
-8.3	129.2	136.8	195.8	496	422.2	196.1	-15.3	66.5	-7.1	357.2	-3.2
296.2	134.7	401.2	-10.6	393.9	18.2	198.9	8.8	196.9	-2.5	-0.8	19.5
-6.3	194.6	232.8	125.2	442.5	-104.2	236.4	-59.2	179.3	131.5	90.8	8.2
12.8	351.9	1.1	252.8	481.9	-72.2	223.4	118.2	45.9	8.4	204.3	112.8
-0.5	461.8	98.5	-8.3	355.5	-21.4	354.2	64.5	-2.2	21	427.5	7.5
429.2	174	120.8	-7.9	236.4	106.1	73.6	5.1	198.5	111	217.4	-18.4
-2.6	221.7	-36	-19.4	201.6	336.1	283	-6.8	216	7.6	208.5	1.2
-16.8	353.5	351	-3.4	349.5	77.4	80	-1.5	-98.8	-7	243.1	-85.9
8.6	-1.5	196.4	9.9	1068.8	157.6	90.1	3.5	86	-79.6	104.8	-6.3
-10.2	260.5	114.5	10.5	40	77.5	108.2	2.8	56.5	22.8	0.8	6.2
-4.3	25.8	148.8	-0.2	313.8	37.3	189.2	-29.8	166.7	-30.5	88.1	-6.8
-6.2	228.8	167.1	-9.1	74.4	348.6	-32.9	-2.3	-20.6	5.2	76.1	-0.8
-0.8	1.3	51	-4.5	-92.9	-50.8	73.7		130.7	6.9	0	-7.3
402.5	311.4	-3.6	152.4	184	-260.8	125	-3.3	62.7	0	522.7	2.2
651.8	263.5	386.4	-111.5	179.6	46.1	303.8	14	47.4	9.6	158.2	4.2
3.8	204.2	8.7	23.5	558.9	26.8	146.3	-5.6	139.5	-5.3	23.9	-4.8
334.2	264.5	-4.6	4.8	432.5	-33.5	287.5	-7.4	64.3	1.9	741.8	230.3
-1.4	58.5	-6.6	78.5	26.7	-28.1	187	-6.9	112.6	20.2	1476.7	-8.2
-5.8	380.1	26.6	297.5	-12.2	121.4	189.4	9.4	120.6	5.7	221.5	-1.3
2.2	136.8	68.2	744.5	146.3	427.5	4.6	-12	121.5	-22.1	851.3	-2.5
-15.2	217.2	-79	3.2	304.2	40.5	114.5	11.4	140.7	-18.1	387.4	-4.1
-11.5	132.8	113.3	177.5	176.2	85.7	94.2	1.8	85.8	57.5	445.1	-1.6
302.3	7.8	349.2	10.8	199.2	155.6	114.4	4.2	190.2	-21.2	55.6	4.4
0.6	254.2	119.7	12.6	282.4	7.5	196.2	2.2	61.9	-2.4	501.4	39.7
347.7	-4.6	315.9	141.9	531.8	35.6	-9.9	2.9	113.2	-1.7	-5.9	0
4	214.5	20.8	158.4	620.9	-59.4	279.6	-3.2	81.7	4.8	25.3	-0.2
547	-2.9	451.2	92.2	297	-77.4	73.3	2.9	26.8	-4.2	-0.8	4.5
-0.4	239.6	186.4	14.7	536.5	102	-10.5	-10.2	42.5	18.1	4.3	1.1
467.8	-13.1	21.9	412.3	835.7	-58.2	190.5	3.8	-14.3	-4.2	543.8	-1.5
208.6	524.9	207.8	677.2	82.8	80.7	568.1	-12.4	12.8	1	271.5	1.5
4.5	162.8	203.1	255.2	447.5	-113.2	-3.9	6.2	277	2.5	25.8	7.2
9.9	29.7	299.2	19.5	-248.2	577.6	-4.1	-2.9	-2.5	-2.8	51.4	33.5
295.9		239.3	-11.2	28.2	6.8	1.2	-13.4	59.6	3.3	-4.7	17.5
22.4	139.8	39	491.5	322.8	-45.2	0.3	-9.2	-4.9	-1	723.2	23.9
-0.8	25.2	456	118.1	284.9	417.8	-20.1	-7.2	17.7	-1.1	351.6	2.4
6	-17.4	16.7	48.3	6.2	267.5	162.9	-3.3	-11.2	2.3	774.5	84.2
3.8	3.9	679.9	32.2	-149	30.2	144.8	-8.5	-27.8	6.5	933.5	-15
496.5	142.6	254.7	66.2	691.3	-75.7	3.8	8	-1.4	5.5	79.7	331.8
244.1	24.1	445	149.3	548.2	2.2	-9.7	-2.2	-59.2	8.5	7.1	56.2
0.2	-3.7	389.5	4.1	698.5	36.1	5.5	-7.7	97.8	-3.3	94.5	33.6
361.2	9.2	286.8	-142.8	192.9	150.6	4.8	-8.9	35.9	51.9	434.1	-111.6
197.9	293.4	28.7	-30.3	530.5	113.5	-4.8	18.6	278.7	5.4	554.1	-6.5
7.9	386.8	246.5	236.7	231.5	117.8	246.8	203.2	95.3	2	143.2	36.2
215.9	168.2	549.8	703.3	450.3	-75.2	5.5	-6	101.5	2.9	1202.3	8.4
-4.3	-37.2	370.6	-30.7	413.3	301.5	188.5	3.8	-12.4	-7.9	46.3	-19.4
-0.1	129.3	-10.3	361.9	414.2	192.7	171.3	11.5	18.2	1.3	54.1	50.5
2.4	62.6	149.9	129	267.2	20.5	-22.7	-6.8	264.9	14.2	849.5	-36.9
-3.6	174.6	409.6	91.3	3722.4	196.7	0	3.7	0.5	0.1	875.8	-1.3
	-0.2		723.5	447.2	17.6	94	-3.1	-36.5	-3.3	5.2	-13.4
-8.5	111.5	4.8	310.1	102.8	-22	116.9	44	139.4	-11.1	739.2	-2.1
357.5	232.9	23.8	237.4	169.9	62.5	-8.8	-27.8	258.8	-6.2	530.8	-37.6
453.2	240.2	429.7	317	297.3	-47.8	316	62.8	126.8	5.3	623.6	79.5
-2.9	178.7	190.2	99	429.2	64.7	42.2	83.8	-7.2	6.2	149.8	4.5
427.7	-63.4	34	-7	392.5	-75.1	161.6	16.3	198.5	-3	13.5	-26.2
386.3	33.2	363.1	238.3	185.2	203.2	136	531.1	1.5	-6.4	67.5	-46
-21.7	532.5	34.2	45.8	148.9	257.4	84.1	11.1	-11.1	2.2	790.9	-125.5
-17.2	-0.8	213	25.8	449.7	187	14.7	51.1	6.6	-0.1	33.2	-206.8
-1.6	636.7	499.8	-15.8	192.8	452	198.2	-1.5	13.5	-10.2	511.7	3
-0.5	9.2	367.5	-219.5	-12.4	197	152.3	-0.5	-23.4	-13.6	-18	-246.5
663.2	243.2	363.5	-150.8	333.3	100.2	64.8	227	340.1	-4.7	727.2	2.8
35.7	955.4	673.2	267.7	250.5	446.2	2.1	220.2	369.8	2.4	444.1	-75.9
504.6	154.8	932.4	687.4	443	-78.7	0	-22.8	176.9	-4.1	310.7	3.2
429.2	5.6	622.2	-122.8	196.5	207.4	126.1	-63.8	3.4	42.2	288.3	56.8
436	371.2	129.8	362.8	500.5	153.2	-8.3	14.1	33	7.6	133.9	4.2
509.9	56.5	426.9	317.2	672.2	184.2	70.6	6.3	62.8	-2.4	91.8	9.3
-1.8	9.8	320.4	0.1	217.1	9.2	91.4	-1.2	337.5	-0.4	126.6	12.5
1.8	191.1	667.1	308.8	522	-4.1	110.5	-5.2	-1.6	1.6	100.4	-4.5
469	-5	324.5	71.4	259.3	121.8	122.7	66.5	215.9	-4.5	445.7	3.9
-4.1	-135.3	543.6	322.6	174		153.8	257.5	14.2	-5.7	62.9	3.4
241.8	420.5	734.8	472.1	353.9	1.5	92.6	-5.4	155	98.7	77.3	10.2
-8.5	31.7	237.8	218.5	625.5	-6	3.1	-16.9	275.5	63.2	40.1	31.9
480.2	170.5	533.5	210.4	235	4.2	-8	221	47.7	18.4	-16.9	4.5
282.5	668.8	673.1	362.5	596	21.2	0.5	27.8	93.5	21.7	87	2.1
556.8	-16.7	452	278	103.6	67.2	93.3	226.5	-3.3	2	975.8	2.8
368.9	371	503.6	88.9	255.4	-17.5	3.2	-23.7	10	-12.2	683.5	0
231.2	163.9	-9.3	53.9	22.9	132.1	275.9	9.7	140.2	9	2.5	8.5
532.2	147.3	-2.4	68.2	-7.5	22.9	52.4	7.4	55.2	4.4	89.2	-0.2
-10.5	3.2	602.5	450.4	169	121.4	-0.8	-1	279.5	3.8	2.1	4.5
513.4		-3.6	-233.2	-81.2	-31.6	142.2	1.9	-55.2	8.5	38.6	-3.2
-3.8	296.2	397.8	-285.7	-8.5	-223.3	77.1	72.1	-8	21.1	19.8	0
312.6	293.2	387.4	5.8	16.8	-43.9	23.9	-42.8	-4.2	-60.2	600	-10.1
327.2	-4.8	61.2	114.5	-2.9	12.5	10.7	-75.9	6.7	-0.8	941	1.5
282.5	41.6	5.1	-37.7		255.9	9.4	26.7	35.8	10.9	685	0.8
400.6	25.7	539.8	-133.3	520.5	102.5	5.4	-11.5	7.9	-64.8	744.5	-4.5
113.6	24	376.8	-15	13.4	447.2	10.8	-1.1	8.5	64.2	-11.9	-12.9
375.7	-11.7	463.8	54.2	-4.4	-21.7	80.9	-1.3	76.1	1.9	0.7	4.1
-4.8	-4.8	517.1	196.6	295.7	206.5	12.3	3.2	-5.6	-1.4	616.8	-11.4
455	58.5	-8.8	421.7	352.3	164.6	3.6	-15.8	119.4	2.6	0.8	210.4
427.2	-5.4	509	16.4	288.2	50.6	-4.4	-9.5	12.2	21.5	-12.8	-8.2
396.5	0.3	-1.6	162.5	221.7	-83.2		5.7	8.5	-0.9	9.1	19.6
430.8	7.9	183.2	-15	322.2	42.8	327.6	-17	-2.8	-6.8	-2.8	-0.5
493.1	207.7	363.7		153.7	-17.5	-2.1	3.8	8.1	-0.5	637.8	-0.9
551	178.2	0.8	-7.8	342.4	-47.3	302.6	1.5	123.5	11.2	-2.2	1.4
192.7	0.6	2.3	191	221.8	-75.7	537.6	-3.9	20.8	-2.2	0	51.8
3.1	-10.9	1.5	99.8	168.5	135.8	8.7	-14	21.2	-6.8	142.2	-2.8
529.8	-1.7	-0.5	2.9	138.4	97.2	24.5	-9.4	-8.3	-14.1	237.9	-1.1
322.6	58.5	84.6	79.1	431.2	272.1	442.2	10.8	-8.2	3.9	5.6	2
-11.5	-10.6	6.7	-5.5	17	-24.1	6	1	93.3	-5.7	15.5	-1.8
210.5	-5.4	446.6	-12.5	240.4	113.7	548.9	100.5		0	2.5	6.4
570.1	7.7	57.8	38.8	429.9	37.8	511.8	-33	35.4	3.3	149	2.8
318.8	121.5	34.2	101.5	330.8	62.1	235.5	-10.5	77.9	3.6	104.6	12.6
358.3	92.2	654.5	159	-110.5	134.7	342.5	92.2	193.5	6.7	-8	21.8
23.9	178.1	100.2	115.6	-9.3	-159.6	601.4	1.4	-2.1	4.2	129.3	0.9
128	-2.5	33	121.4	322	170.3	375.1	-67.5	89.2	19.4	6.6	3.2
303	264.7	8.8	-7.2	434.5	-123.2	735.8	90.7	58	70.4	265.7	12.1
524.9	39.2	-5.9	155.6	505.6	-109.3	568.8	126.8	583.7	-38.3	-9.3	2.1
1.5	-2	40.5	257.7	250.3	29.1	354.2	-20.2	88.2	5.8	2.8	11.2
324.2	3.5	34.8	9.2	456.5	252.5	256.5	-16.4	40.7	104.2	-3.8	1.9
-7	125.6	52.7	133.8	222.2	405.7	203.9	-32.2	89.5	16.5	96.8	-1.3
7.4	68.8	67.8	153.4	681.4	72.5	43.9	-42.5	27.3	14.5	8.2	-1.5
327.1	12.7	11	344.1	1044.4	21.2	20.1	176.5	106.7	18.9	21.3	4.2
	50.2	37.8	234.1	510.5	272.7	609.8		82.6	309.3	66	0.9
209.1	125.5	63.5	52	-174.2	95.8	13.6	-2.2	225.7	33.2	0.2	-2.1
35	-9.7	-0.6	120.9	27.9	68.8	471.4	-4.2	5.9	52.3	31.1	17.4
352.5	63.4	123.8	311	304.2	484.4	245.2	-11.2	350.5	-9.7	-13.1	6
163.8	-5.8	70.5	140.2	875.4	191.1	118.7	39.2	171.5	15.8	115.6	-10.1
26.2	25.5	105.2	205.3	192	-86.8	176.8	418	2.2	427.7	-1.6	1.6
285.4	20	27.8	398.8	381.6	73	174.7	944.5	75.7	-102.9	103.6	0.8
315.2	62.5	70.2	213.2	-19.3	-34.6	120.2	-23.5	23.7	-11.6	8.8	10.6
165.4	137.5	168.5	81.2	110.1	171.3	27.2	2.5	-2.5	6.2	42	-1.1
-1.9	7	35.4	101	337.1	-66.6	38.4	257.7	-1.3	-8.3	-19.8	-7.4
15.6	71.7	107.2	46.5	-228.5	109.7	110.8	0.5	28.9	9.5	47.2	2.5
429.7	153.2	60.6	110.7	789.2	-331.6	28.3	145.1	65.5	1.4	25.2	-2
-24.6	118.1	101.8	8.9	-28.6	470.1	166.6	48.9	26.8	2.5	19.5	-5.6
558.1	66.8	54.3	176.1	987.5	160.5	72.8	495.2	93.6	-4.8	5.3	-4.1
175.8	46.9	96.5	210.5	356.6	290.4	111.8	378.3	203.7	8.1	33.5	-8.8
23.5		-7.4	99.2	37.9	-56.9	-5.2	20.5	143.8	-9.8	17	-10
155.8	-2.9	8.5	18.4	360.7	234.2	156.2	-106.8	50.7	0	79.8	3.2
36.9	-7.9	49.8	464	552.8	270.2	299.5	-47.2	31.8	45	76.5	11.8
110.2	-0.2	29.3	77.8	64.3	88.9	18.4	-115.8	1.2	-35.9	35.5	5.3
2.6	3	15.2	149.8	308.3	607.8	103.6	11.8	14.9	-1.1	-9.6	10.1
70.1	-2.8	32.3	-1.8	-29.7	77.7	6	-169.4	240.3	3.3	34.3	1.9
28.9	3.8	53.7	347	1068.7	28.7	119.6	1.8	68.5	-4.5	264.8	9.2
71	6	33.1	74.6	291.8	366.1	287.5	1.3	108.8	-20.2	180.9	-0.6
168.4	3.5	99.5	1	121.3	-5.8	-4.2	145.1	92.8	57.3	-16.9	5.3
151.8	-3.9	32.7	56.9	261.2	-58.9	23.8	613.8	90.8	308.4	-11.2	10.2
-6.2	20.8	0.5	158.2	472.2	169.9	311.8	937.5	3.2	85.8	-7	-10.1
502	0.3	20.8	-6.7	294.8	99.9	111.7	61.8	3.1	296.9	-19.5	-12.5
63.5	249.5	-2.2	-2.2	757.3	-142.9	6.4	8.2	66.1	70.6	328.2	6.1
206.2	-1.2	90.7	158.8	355.5	-18.4	23.6	-76.5	6.5	336.6	13.2	7.5
465.6	-1.3	21.7	-10.8	410.3	0.3	80	-44.8	6.1	251.3	35.3	3.8
165.9	-14.2	123.2	85.1	660.4	-110.6	2.5	1005.7	456.2	-9.7	322.2	-12.9
-115.6	-2	17.9	1.9	337.4	202.5	22.3	-195	86.2	-1.6	253.5	-0.9
8.1	8.5	59.6	1.3	111.3	-43	112.8	3057.5	56.1	119.4	-2.1	-2.7
-68.5	-9	9.8	-0.5	-26.5	53.2	-6.3	1642.2	4.7	21.9	15.9	-5.4
2.9	-0.1	105.2	0.9	671.4	124.6	86.3	4	-1.3	-0.7	6.5	0
293.3	252.9	125.4	15.5	644.4	51.7	372.6	476.1	-5.9	9.6	2.8	-16.9
450.8	24.8	27.8	260.6	125.5	75.2	-11.5	470.1	-4.4	-7.8	299	4.6
332.4	-1.8	16.5	1.3	764.7	-80.8	43.9	50.2	167.6	53.8	81.2	4.2
252.2	-3.1	44.7	19	-58.3	67.5	1.5	24.5	103.5	-2.4	-5.7	200.4
203.6	18.7	22.5	1.8	710.8	2.3	-2.8	265.1	132.9	3.1	120.3	84.6
14.1	379.4	37.2	-5.7	574.5	340.4	261.5	81.4	-7.6	1.1	113.3	1.5
496.6	2.5	-5.3	-7.4	835.3	259	199.4	-2.8	125.4	6.1	-2.7	-2.2
474.5	9.3	-1.9	72.9	1102	-236.2	120.2	-9.8	368.5	-25.7	7.2	-3.2
-4	251.5	-5.1	16.2	262.2	-24.4	183	-46.3	111.2	-1.2	86.5	6.7
112.5	-15.5	3.9	-0.3	524.9	165.2	-21	-7.3	-2.8	-2.5	317.5	6.2
120.1	80.9	111.8	-4.7	533.5	148.3		0.5	136	-2.6	205.9	5.8
279.3	10.8	3.6	6.7	-176.2	-183.5	822.7	-1.3	113.4	0.1	82.7	17.3
108.6	-9.2	42.9	51.1	213.2	105.2	270.9		3.6	-18.6	424.5	29.6
-2.8	5.8	91.5	18.5	1122.1	402.6	681.5	7.2	441.7	-137.5	461.5	4.5
5.7	1.2	27.5	0.5	548.1	23.6	280.4	-5.7	337.8	7.8	6.7	26.9
37.7	458.8	63.3	2.4	11.3	105.8	-2.5	259.2	385.2	2.7	71.3	3.2
122.1	51.8	-2.1	34.1	-5.1	326.6	314.5	2.7	327.9	38.4	91.2	10.9
172.5	1.2	35.8	24	1216.3	70.9	-3.5	247.8	188.9	-152.8	61.1	-60.8
27.9	5.2	43.1	1.2	245.8	18	-9.9	9.1	35.5	10.5	88.8	7.8
14.3	379.2	1.3	5.8	727.3	-76.8	340.3	4.4	71.3	40.5	1006.9	-0.7
19.6	496	70.9	63	549.3	150.7	256.6	40.2	56.9	10.1	62.8	8
-7	846.3	-1.5	49.1	153.9	78.5	191.2	-11.5	8.2	5.5	85.2	-36.7
0.1	-87.4	7.4	9.8	796.9	-22.4	157.1	-4.1	1.2	17.3	48.8	9
	16.3	47.4	0.2	332.3	-126.4	310.2	157.6	9.6	33.2	116.6	-0.9
278.8	-4.3	42.1	2.6	-5.1	269.2	-7.3	31.4	-5.8	31.3	227.1	6.1
284.5	445.9	52	8.7	137.8	-62.8	-2.1	-18.2	131.4	7.3	58.5	-4.8
158.6	-42.4	57.3	-3.6	625.3	-34.5	178.8	-4.3	77.8	-118.7	2.5	-3.6
6.2	312.2	63.6	20.4	23.7	206.6	6.6	52.2	5.2	5.2	28.3	4.6
-3	683.7	42.3	19.6	234	62.4	-24.3	265.4	-9	6.2	152.7	0.6
66.2	-18	28	-2	-6.5	443.5	492.2	106.4	8.6	1.6	86.2	2.8
106.9	6.5	74.2	35.4	274.7	-51.2	437.5	-12.8	349.5	9.8	167.4	1.7
125.1	279.2	54.2	1.6	238	-8.9	187.1	45.3	-3.4	3.7	145.6	-0.8
-1.4	271.5	23.7	12.1	545.9	107.6	532.2	-62.8	93.6	3.9	83.9	0.5
241.1	102.4	10.8	5	539.2	-211.5	7.8	2566.7	-0.4	-8.5	118.7	0.8
66.5	-12.9	47.5	0	89	88.6	319.2	1.5	60.8	-16.9	-4.3	-3.8
206.1	21.8	83.8	54.4	188.3	41.2	300.9	839.2	67.5	-8	283.9	1.5
14.9	14.3	4.8	10.3	260.4	13.8	207	180.1	6.8	9.9	89.3	-2.5
-0.5	592.7	67.6	13.5	323.1	69.7	211.3	247.2	-5.7	-5.3	33.2	-0.8
152.8	76.1	107.1	-0.2	92.2	-297	-5.4	98.2	204.1	86.8	82.7	-2
-8.1	-7.8	2.5	13.6	277.2	27.8	6.6	-24	472.5	2.5	77	-2.6
-4.3	308.8	-0.4	-2.9	592.8	263.5	-10.9	119	123.2	7.2	34.7	1.9
3	348.2	15.4	21.8	446.6	181.8	22.1	0.7	-8	-2.6	37.1	-1.7
-22.5	96.1	3	2.8	-131.9	117.2	16	2719.8	1	10	-3.8	-10.8
300.1	791.2	95.3	-1.1	384.8	6.8	6.5	-9.2	328.9	7.8	188.9	11.4
220.4	11.1	30.5	-5.5	538.2	172.7	6	-10.5	342.5	6	202.8	-3.5
138.8	160.1	6.5	-1.2	668.4	127.5	-15.8	-50.3	-3.6	26.8	15.1	0
148.2	515	82.1	22.2	240.4	251.5	31.2	23.8	278.8	10	180.2	-15.5
7.8	248.6	24.5	25.6	53.8	276.4	300.5	-11.2	307.2	-1.2	66.4	-0.1
3.1	-19.5	30.6	19.3	726.2	232.5	-2.7	1.5	2.2	-11.5	89.2	5.6
131.8	2.5	1.8	6.1	97.8	253.2	56.5	32.6	229	10.4	295	-3.5
163.8	341.2	52.2	38.4	-55.4	142.5	77.8	-1.2	252.2	0.6	65.2	-8.2
169.2	-6.2		30.4	562.3	-8.9	2.6	0	37.8	-2.7	98.8	14.6
13	2.8	6.7	13.1	454.8	421.6	-1.4	1.2	246.4	1.2	115.3	4.2
151.5	196.2	366.5	-9.8	57.8	132	198.5	7.2	11.7	-3.9	112.1	8.8
19.5	582.9	346.8	-1.5	27.5	-26.2	335	3.5	109.3	12.7	0.5	-5.8
248.9	7.5	466.6	-1.8	584.7	-23	14.2		415.3	8.3	31.8	3.5
112	-9.8	-2.3	4.2	1054.5	23.9	240.2	465.3	557.5	-12.5	85.2	-1.9
135.2	211.1	342.3	22.8	-32.8	417.6	555.4	-2.8	125.3	-3.3	2.9	1.2
2	10.3	-2.2	18.3	397.8	219.6	267.7	-12	-1.9	-3.4	39.5	2.8
62.7	8.8	278.5	43.9	-0.7	380.5	10.2	20	515.3	15.2	-2.6	-8.8
-2.5	10.6	223.8	16	591.2	-184.6	110.5		191.6	25.6	7.1	0.5
-11.5	-3.7	185.1	23.9	391	62.3	74.1	16.4	30.9	9.5	58.6	1.1
326.3	213.2	196.7	3.8	367.2	-89.2	220.4	43.5	176.8	13.1	212.2	1.3
-2.5		422	3.6	262.9	121.1	371.4	-12.4	421.8	1.5	87.2	-3.2
253.3	-3.6	231	15.9	-73.8	57.4	447.4	63.4	107.9	10.8	226.6	4.2
3.9	-0.1	32.5	0.8	58.1	70	309.5	-24.2	-6.1	-5.9	13.8	5
7.8	184.6	-7	-9.1	1080	-20.5	55.2	-3	457.2	-3	70.2	-7.3
85.5	203	296.8	33.8	68.2	23.5	162.9	8	97.7	4.7	61.5	-1.1
9.8	0.7	3.3	-1.9	982.5	103.6	66.2		226.2	18.4	61.2	1.2
67.5	-1.8	162.5	49.8	431.8	92.3	40.8	-26.8	460.5	8.4	25.2	0.8
128.5	70.9	-19.1	4.5	334	78.5	-22.8	285.2	146.4	-1.3	34.2	-4.6
98	76	10.4	8.9	-4.8	-24.3	398.7	-84.1	77.5	0.5	51.9	-5.6
129.4	72.5	247	21.3	9.5	-97.7	298.6	108.4	314.1	3.6	68.2	3.8
162.8	3.8	22	-2.3	-7.9	166.3	35.5	1.4	10.5	-15.8	-0.8	0.9
2.8	63.4	260.8	0	-21.2	370.6	255.7	232.8	56.6	-47.4	31.3	-2.5
-0.5	119.2	545.9	-6.4		94.6	437.5	54.1	171.8	5.8	-8.2	-1.3
246.7	142.5	362.5	-5.7	120.8	-80.1	14.8	16.8	228.9	-86.8	68.3	1
110.2	75.4	129.8	17.2	114.8	-192.3	217.2	-42.3	234.8	118.5	48.2	2.6
162.7	3.7	-1.9	0.6	911.9	139.3	59.2	95.2	820.4	-0.9	47	11.3
86.8	50.5	189.5	28.2	77.5	43	372.8	13.8	160.6	4.5	30.9	0.8
85.2	61.2	291.3	22.9	406	8.9	443.3	342.5	194.7	-0.8	1.8	2.2
18.3	12.8	0.7	54.5	-4.4	-191.8	38.8	199.3	192.6	-0.5	87.1	4.5
63.1	-1.8	-4.2	9.4	309	142.9	-21	101.7	242.9	6.8	18.5	-8.7
133.3	76.9	144.8	2.1	-0.9	127.8	-17.8	107.4	5.9	-3.4	2.2	-1.6
118	-0.1	94.4	22.1	3.4	281.9	471.3	47.8	194.2	111.8	33.5	-1.1
12.2	1.8	230.8	21.7	282.4	236.7	371.3	-4	-18.8	0	43.5	-1.4
	-0.2	302	-0.9	102.9	-41.4	115.8	37.5	139.5	-2.2	52.5	-3.7
381.8	3.6	319.5	23	234.7	66.8	152.1	244.1	237.2	0.2	-1.8	-47.5
-9.7	7.7	221.2	12.4	77.2	-30.4	161.8	203.8	150.4	-0.5	65	2
1.8	-2.9	359.9	0.9	101.6	-61.1	275.5	262.9	296.1	0.8	-0.1	-4.2
5.5	17.9	159.8	-2.4	-6.4	25.3	-7.1	209.6	397.3	15.8	65.8	5.2
-2.8	4.4	279.4	30.9	116.5	34.3	187.2	231.3	208.3	24.8	0	0.8
2.9	8.5	151.5	72.7	0.9	-50	189.2	-33.8	111	4.4	107.6	-2.3
7.8	-2.1	482.2	5.8	245.3	89.4	449.6		-4	-30	10.2	6.7
429.7	-3.5	266.2	-3.2	5.2	86.6	-6.9	6	592	7.7	78	-1.5
-4.9	-4	294.3	3.5	-9.1	168.9	7.8	-3.2	248.5	14.1	-0.5	-14.8
2.7	7.5	116.1	0	7.7	-236.8	-6.3	-1	121.7	6.3	51.6	-2.3
512.6	114.4	180.1		267.2	204.2	357.7	4.1	128.3	7.9	-1.2	4.5
535.1	67.8	5.6	5	20.1	10.2	32.1	27.8	44.2	27.5	0.1	-1.2
-7.4	4	11.7	4.2	12.2	-34.5	87.3	-2.7	107.2	-5.1	172.3	1.1
-0.6	-2.2	173.8	1.9	5.2	267.2	7.5	-1.7	146.5	3.8	27.8	24.2
-13.4	84	393.4	-2.4	79.5	293.5	262	-2.7	147	4.2	2.5	-3.1
8.3	2.7	250.9	105.3	-4.5	222.1	2.3	-1	207.4	28.1	35.9	123.2
3.5	166.2	-26.9	2.7	190.9	250.5	-9.6	-0.3	141	73.1	8	-1.2
-9.4	7.8	468.8	21.1	117.4	91.5	-7.9	1.7	8.6	-21.4	21.8	-3.5
323.8	-5.2	904.5	84.6	0.1	186.2	471.1	-1.4	175.2	1.8	32.5	-3
-3.5	70.4	-4.7	109	182.2	153.2	190.8	106.4	198.5	5.7	-104.7	-1.4
10.6	-4.8	129.3	84.4	203.7	-49.8	6.8	10.9	-1.1	1.5	1.8	-0.4
3.2	48.2	46.5	71.1	153.8	-160.7	94.7	7.9	192.1	-21.2	177.2	-3.8
360.7	195.3	96.5	-2.9	159.9	-246.7	-1.8	3.5	243.8	-1.7	-0.8	29.9
6.2	50.8	-4.2	15.6	227.9	172.5	187.9	1.7	257.7	-12.1	17	2.2
443	-3.3	932.1	124.8	118.2	8.9	-9.8	-2.6	276.8	10.6	-174.8	2.3
-4.8	89	234.5	-1.8	107.8	-179.4	358.5	3.3	68.4	-11.8	-14.8	-5
295.7	21.1	396.3	2.1	165.3	151.8	1.2	-1.4	148.8	6	4	9.2
570.7	0.8	261.7	-17.5	-5.3	54.4	4.8	3.9	362.4	1.7	4.6	0
359	91.6	1304.8	158.3	207.4	121.2	119.3	-8.2	100.5	-11.7	-53.2	-1.1
9.4	91.5	-12	176.3	167.6	8.8	-2.7	-0.3	271.6	-20.4	198.5	-3.4
6.4	42.8	279	80.4	154.7	237.5	8.1	29.3	197.1	1.1	71.9	-3.2
24.8	2	1036.5	58.6	237.8	-31	148.1	0.7	-3.5	-5	117.4	-18.3
6.6	58.5	197.2	-1	202.5	-38.1	8.8	0.9	1.7	2	66.7	2.4
0	3.1	198.9	186.2	151.8	-18	-8.8	-5.7	179.2	6.3	-35.5	4.3
492.6		180	-5.2	106.9	360.5	-0.7	3.5	128.3	-16.2	-105.8	-3.9
4.7	658.5	30.8	1.1	23.5	131	3.3	-3.2	3	4.8	59.5	-0.7
0.2	591.5	339.5	-10.3	109.9	145.2	87.8	3.4	59.9	6	-3.2	-9.3
-1.1	577.5	136.5	9.5	176.4	-48.5	212.9	-0.9	361.5	-2.8	24.3	3.6
8.6	1636.3	536.9	-0.7	156	234.2	166.9	8.9	281.4	13.1	38	2.1
9.9	624.5	262.5	-1.2	-0.6	248.5	143.2	2.3	300.7	21.2	64.5	26.2
-4.9	428.8	252.8	60.7	0.7	-109.5	30.5	3	262.9	-8.2	135.9	0.1
3.4	472	358.9	-1.2	180.2	-4.9	224.5		13.5	3.8	-3.3	-1.6
391.2	155.5	12.5	2.4	140.5		291.4	-7.5	352.2	-2.6	316.7	-1.2
393.8	-131.8	305.6	37.6	109.5	-0.2	-2.9	-3.8	100.7	5.2	42.1	13.9
520	64.8	261.4	-0.2	220	0.5	4.8	-1.8	6.2	4.8	58.8	-0.8
6.1	33.1	117.4	-6.2	-0.7	9.3	194.3	-2.7	174.1	12.5	498.5	8
830.1	402.4	421.2	10.5	64.2	50.9	108.5	7.2	244.2	6.5	168.2	-3.2
494.5	540	-2.6	236.3	5.8	3.8	8	-0.7	11.3	6.8	238.1	1.4
413.2	337.9	237.8	96.2	176.8	2.5	35.2	0.4	102.2	-2.3	-86.8	2.8
50.3	387.7	980.4	2.8	195.5	4.2	-7.9	-8.2	145.6	-8.8	-37.8	38.1
650.7	-50.7	269.8	-1.2	183.2	12.5	204.9	22.9	196.1	0.9	119.1	24.7
10.8	705.8	47.7	-1.4	305.2	32.4	0.5	0.8	124.5	-1.5	-63.1	-63.4
7.8	384.1	3	-1	331	5	45.4	5	89.2	1.9	-19.7	2.2
10.7	621.5	283.6	1.2	171.2	2.1	-12.8	-6.5	-19.2	-0.4	106.6	0.3
440.9	901.8	666.9	-8.2	3.4	-5.5	204.1	74.2	209.2	3.2	-15.4	14.8
1680.5	418.2	307.8	109.5	189.9	-1.3	12	8.9	30.7	-9.1	-10	18.7
687.1	440.2	393.8	4.3	35.8	135.8	11	8.2	81.8	-8.8	-72.4	16.4
509.9	1020.5	129	58.2	96.3	-11.1	123.2	31.2	396.5	8.5	96.5	0.2
398.2	408.5	753.2	154.8	274.5	4.9		-10.6	205.5	2.4	-79.4	-0.3
7.8	89.7	358.4	247.6	260.5	1.8	4	1.6	-0.1	-2.7	404	-53
-140.8	214.5	245.4	2.2	264.5	20.4	53.8	-73.4	-6	-2.9	279	-2.8
1753.5	1143	-111.2	211.5	5.5	0.7	103.8	-1.2	319.1	1.7	6.5	2.2
16.4	359.2	36.7	131.2	238.6	12.5	-1.2	-32.1	125.6	-4.1	-149.4	28.8
862.5	678.8	395.7	44.5	-2.2	1	288.1	8	107.4	-2.8	-131.5	0
647.5	607.3	210.1	49.6	77.4	-13.9	133.5	9.4	271.6	-7.5	50.5	0.1
14.7	330.8	159.8	32.9	-4.4	-1	339.3	12.2	388.3	-1.3	-4.3	-9.5
5.4	602.5	1181.3	108.5	182.2	-2.5	133.7	-7.2	168	-10.3	-211.8	0.2
7.7	-17.5	86	55.1	157.4	-1.1	98.8	9	1.8	-3.9	-31.6	13.5
355.1	401.6	814.6	0.4	175.2	4.2	74.9	3.5	87.9	2.2	149.5	-1.5
3.8	417.2	480	-17.8	195.7	-3.2	472.2	7.8	71.1	-5.2	55.2	-1.6
41.1	449.5	-8.5	5.8	85.1	9.2	4.9	1.7	1.7	-10.2	19.1	-1.3
5.5	20.7	44.3	19.5	168.1	-14.7	153.3	5.2	12.2	2.8	214.8	-1.7
1146.8	825.9	351.5	74.5	-1.2	12.6	87.2	177.5	-6.3	-7.8	106.5	2.9
-15.9	416.2	412.2	31	-3.1	3.3	108.7	5.5	438.8	3.4	125.3	-5.4
14.7	-30.5	167.8	15.7	185	8.2	4	-5.2	115.9	-7.7	89.8	-0.9
608.8	394.8	446	-7.1	161.2	2.5	121.9	6.5	-12.6	0.3	56.1	2.2
163.1	162.3	192.8	-24.9	236.6	1.5	64.1	6.5	-3.1	-4.2	-198	5.5
21.9		131.2	59	44.2	0.3	119.6	-2.9	-9.6	26.2	1.8	-5.5
1062.3	9	229	3.8	22.2	137.2	42.9	55.4	246.1	4.5	98.9	112.3
1725.6	-3.2	216.3	90.9	-1.9	1.2	37.2	-0.7	-0.3	-2.8	183.7	-3.1
5.2	-6.6	957.7	-4.7	0.9	-3.8	357.7	50.2	-5.2	10	754.9	2
698.2	72.7	262.1	164.7	-0.6	7.7	104.5	0.1	8.9	-8.2	-1.6	4.2
579.1	-2.5	116.2	309.6	-0.2	3.6	7.1	8.1	-4.6	0.9	59	-0.8
5.6	-4.3	214.2	132.3	179.1	-9.7	5.3	0.3	246.5	13.3	133.5	-1.8
947.3	48.5	6.8	26.2	0.5	-2.3	62.5	-10.9	260.7	-0.3	-1.8	0.2
854.2	4.9	-5.4	18.2	-2.7	1.9	122.7	-1.3	216.3	-2.5	13	3.3
614.2	-4	4.7	-3.6	8.4	36	3.2	6.8	207.7	3.8	4.5	1.9
1118.1	0.3	86	32.9	-10.5	4.2	0.5	10.3	-12.6	5.6	92.7	5.8
1.5	-5.4	227.5	41	331.5	0	79.5	-0.5	192.6	2.8	156.4	-2.7
-3.8	6.2	211.8	-0.2	-2	-1.5	81.8	-6.2	138.3	-12.9	-1.7	2.3
-5.1	43.4	418.9	198.9	9.9	-1.6	27.9	-6.5	-1.3	4.2	27.5	5.4
7.8	61.1	59.5	105.2	-3	7.9	-4.4	2.1	-7.4	3.9	66.2	1.4
20.1	65.1	189.7	200	110	-1.1	143.8	-3.5	-1	5.7	52.8	-4.8
716.1	120.5	1174.6	6.2	28.7	-1.6	61.4	2.1	-0.1	6.5	-4.8	5.5
662.3	-0.8	80.2	-13.3	12.5	3	-3.5	-7.6	205.4	0.2	9.2	1.6
-1.1	91.5	314.4	170.8	202.4	-8.6	131.1	-2.3	17.2	0.2	6.6	4.6
1117.5	48.2	148.1	56.2	75.8	-0.1	9.6	6	170.5	-0.2	137.7	-4.8
471.4	3.8	159.4	238.3	193.8	2	142.9	-9.8	204.1	-1.7	5.6	1.2
659.2	59.8	170.4	46.2	252	-3.6	73	-1.1	-13.2	-2.2	79.3	2.2
-13.3	78.6	1.7	60.3	128.4	0.2	131.2	-1.2	152.2	3.1	36	-1.8
1035.9	4.5	2.1	115.7	139.9	-4.7	100.4	0.5	8	3.3	319.6	-0.6
1404.4	-0.9	92.5	373.1	291.8	2.1	9.2	16	-3.8	-2.6	92.7	-5.2
1102.3	28.5	447.2	96.9	227.2	-3.2	50.7	1.2		2.1	5.2	0.6
-6.9	82.2	438.3	13.2	211.8	5.9	12.1	4.9	41.8	0.5	108.9	0.2
4.5	44.3	219.8	26.7	-4	0.8	-9	-2.3	14.3	0	33.2	-4
439.8	92.7	126.1	69.7	138.2	3.7	47.6	1.3	24.8	1.1	94.5	2.4
459.2	147.3	7.7	15.3	154.4	4.2	3.5	-2.2	6.4	-6.8	145.5	-3.7
1073.2	44.2	150.7	-31.8	176.1	7.3	239.6	-8.8	1.3	-1.5	4.1	2
423.9	145.8	106.6	61	159.7	7.6	14.3	1.5	15.3	-2.2	1.2	2.2
377.5	61.2	195.4	3.1	110.8	18.4	-6.2	4.1	123.7	8.2	1.9	0.8
450.2	152.8	44	30	6.5	2.8	-3.2	10.2	126.5	-31.2	51.4	-4.3
1034.2	-0.4	58.5	8.3	417.2	-5.2	10.8	0.8	112.1	5.4	7	-5
447	-1.9	202.4	-83.2	124	-3	64.3	1.2	24.6	-3.5	0	2
383.6	60.8	171.8	130.7	153.5	-0.2	98.3	-7.1	70.5	1.6	87.8	6.1
9.5	4.8	412.4	78.8	217.2	-3.5	98.2	-4	10.2	-5.9	2.5	1.3
533.6	86.5	36.7	33.5	201.8	-2.5	10.8	-8.7	0.5	-5	6.3	7.5
-3.2	60.2	395.5	-9.8	100.8	3.8	11.2	-5.2	43.8	-4.1	15.4	1.2
-4.9	417.2	235.8	-15.9	245.5	9	8.9	-6.7	-13	3.2	-5.4	9.5
537.8	-1.9	209.1	200.5	308.1	5.9	8.8	6.2	-3.8	0.5	6.2	2
767.4	26.2	207.4	62.9	303.3	-7.2	43.3	-1.7	216.8	-4.1	324.2	2.2
-2.2	35.2	110.8	-2.2	260	3.4	-0.1	0.4	714.1	8.9	-3.7	-2.8
618.2	35.6	409.5	78.4	274.8	1.8	18.2	10.2	51.3	-0.2	-1.1	1.5
6.4	61.2	213.6	270.8	216.1	-4.4	5.5	-1.1	7.5	4.9	1323.4	1.9
344.9	120.5	0.8	1.6	-2.8	-3	-8.2	-5.4	43.5	-2	3.2	-0.8
282.3	107.5	264.5	227.2	160.5	289.5	95.8	9.6	47	1.8	-18.1	-0.1
309.8	26.9	53.2	-12.7	345.7	0.4	135.2	-0.2	1.2	23	147.8	2.5
-2	3.1	140.3	83.8	384.2	-2.9	0	2.3	-0.2	-6.2	294	-4
-4.2	93.2	243	86.8	220.5	25.4	17.1	-1.9	-4.6	0.5	-15.6	3.9
11.2	105	159.2	13.5	114.4	0.7	-12.5	-1.5	9.9	5.5	18	1.9
6.8	6.9	122.4	22	133.9	-0.4	1	4.2	6.4	-12	492	0.1
422.9	84.3	245.6	45.1	139.8	-3.1	-14.8	-4.4	39.5	-1.6	397.5	4.5
338		94.1	218.2	85.8	1.8	91.5	-0.7	21.6	-15.5	186.9	0.7
15.3	1.4	185.8	80	290.5	1.5	12.5	-5.1	15.5	-0.9	404.2	3.4
-0.2	90.5	252.5	108.5	132.1	11.2	116.1	-0.1	32.8	-2.5	120.4	-1.1
400.2	-8.6	322.3	-0.6	77	0.6	3.7	-0.9		-0.1	160.2	1.5
8.1	66.4	-2.7	4.4	155.7	4.5	21.4	2.9	558.4	-14.2	8.5	-3.5
43.6	36.9	165	-23.6	142.2	-6	101.4	4.7	762.3	-6.2	235.7	1.8
435.1	67.1	206.9	70.2	391.5	1	7.1	-1.8	17.5	-0.8	-6.3	5.8
-0.2	74.2	217.3	56.8	157.8	-0.3	127	1.2	485.9	-0.3	4.5	-1
5	91.1	-1.6	968.7	278.3	0.8	127.5	2.5	1.2	-5	99.8	3.3
-1.5	92.1	12.9	189.6	180.1	5.6	60.8	4.5	128.5	-0.4	1051.8	-1.5
3.3	28.1	7.5	116	5.9	2.8	176.3	-0.5	5.9	-12	109.5	4.2
-0.2	31.5	232.5	-32.8	63.9	4.5	13.6	14.9	249.2	-1.7	8.1	1.8
312.4	93.8	87.6	138.7	6.2	3.6	404.8	19.5	-9.2	3.5	344.2	-1.3
	46.7	0.8	62.6	221.4	-1.4	-6.8	3.6	318.2	-8.9	-35.2	2.2
270.5	161.9	262.5	81.2	93.1	7.7	48.3	2.5	380.5	7.9	184.6	2.3
33.6	18.2	174.4	2.6	73.1	-5.7	53.1	0.6	-5.5	-12.8	425.1	6.5
251.3	199.4	225.8	150.9		6.1	3.6	2.5	203.2	2.5	86.5	-3.7
177.6	92.2	110.2	-246.1	-1.4	1.2	213.9	4.5	118.5	-16.2	252.9	0
130.8	69.6	93.5	180.9	381.5	2.9	238.4	-3.4	36.8	-1.8	203.2	-2.2
164.2	0.8	-0.9	48.8	575.1	3.5	112.5	-5.3	128.8	20.2	116.3	-2.6
87.8	142.9	-2.8	22.9	453.3	-2.8	33.2	0.6	662.8	73.8	7.2	-1.8
251.2	47.8	4.8	9.5	298.3	-3.9	-1.1	-1.9	9.5	1	17.3	148.5
200.4	56.8	4.6	71.5	405.4	0.8	12.8	-3.5	-41.6	-2.1	227.7	-1.8
158.8	33.6	0	-15.5	1611.7	7.3	56.8	0	739.6	10.9	192.2	253.7
184.3	4.7	125.9	3.6	493.4	4.8	5.4	-1.2	1077.5	3	0.1	-47.8
163	110.2	209.4	-15.4	3.4	10.3	10.2	9.4	397.9	-1.1	2.8	-3
129.5	35.2	24.3	27	380.8	22.7	57.6	-4.3	91.7	-6.3	-4.5	32.2
34.1	37.9	200.5	31.1	956.7	0.8	36	-3.9	198.2	3.6	7	-0.2
127.8	-0.5		114.1	711.2	8.2	-1.7	-1.2	732.8	-7.4	59.1	443.1
145.4	70.2	254.6	7.5	2.6	1.5	246.2	-6.5	6.6	13.2	88.3	-408.2
177.3	-6.8	8.7	51.9	392.6	-2.6	298.4	-1.1	976.2	2.5	171.8	-36.6
139.8	18.4	345.9	90.8	528.8	3	5.8	26.8	552.8	-7.5	-1.3	31.7
110.1	91.8	325	-6.3	2.7	-1.2	76.8	-4.7	494.5	-2.5	-4.1	62.7
-1.3	179.1	0.5	63.7	317.9	-3	25.9	-5.3	563.2	3.2	-2.3
1.3	27.3	1.8	-9.4	228.9	-4.3	107.5	0.8	-16.3	-7.2	-15.8
241.8	9.5	-0.2	15.5	417.8	-3	-1.5	-7.3	-2.5	14.8	15.2
212.9	83.5	-1.3	112.4	411.9	-6.8	134.5	-10.9	936.8	-1.9	154
168	35.7	6.5	100.6	483.8	2.3	131.3	4.4	171.6	5.4	18.3
149.9	76.8	1.4	-21.1	751.9	-2.8	8.1	-2.8	4.1	2	3
85.9	2.8	5.2	71.5	671.3	3.5	5.3	7	101.4	0.2	171
129.1	1.3	1.2	46.9	372.8	6.5	24	4.5	18.9	5.3	29
14.8	133.8	-10.5	69.8	646.7	-3.6	-0.1	-3.4	-7.7	-3.9	4.3
76.7	63.4	-9.5	20.8	456.1	6.7	12.2	-2.7	25.2	-0.5	5
-4	-8.2	354.7	-7.8	846.5	6.8	179.5	4.8	-1.6	99.3	230
0.2	241.8	-0.2	26.6	365.6	4.6	267.1	8.4	14.7	2.5	-6.7
197.2	25.5	-0.2	71.5	674	-5.5	13.9	11.9	-5.8	260.1	52.4
142.2	167.6	-1.2	22.9	327.3	-4.2	55.8		34.2	-5.5	18.7
-0.2	272.8	392.9	-2.1	23.8	1.5	-4.5		64.7	1.5	105.5
1.3	256.1	6.8	12	202.7	8.2	18.7		11.2	0	26.8
211.2	2.8	80	-2.4	657.2	3.3	-18.5		-7.2	-0.2	-3.7
177.5	16.2	3	39.2	443.5	0.5	5.2		26.8	1.2	5.8
160.5	-9.2	178	6.8	4.4	-0.1	11.2		209.5	7.3	128
155.4	109.9	12.2	59.7	883.3	-9.2	249.8		12.4	-6.1	157.5
495.1	88.8	4.4	71.2	493.7	-5.1	108.4		-5.6	-3	37.8
264.8	56.1	7.4	30.8	428.4	-13.8	126.8		17.3	-3.5	1.3
284.4	124.7	12.5	94.1	680.1	0.2	10.9		933.2	5.1	141.7
146.9	214.5	285.5	4	473.4	-3.5	-1.5		268.5	5	18.8
5	180.8	97	23.7	-7.2	-5.5	259.4		48.4	1.5	2.7
97.2	71.6	260.4	-3.2	325.6	189.7	59.5		6.7	2.4	135.8
61	67.9	320.9	-6.8	7.8	8	340.4		57.8	15.5	-1
127.2	-5.9	46.2	-3.3	456.4	8.8	199.9		666	-0.7	65.6
171.4	229.2	295.5	-3.5	-2.5	14.5	57.2		46.4	0.7	13.4
151.9	4.9	63.8	-0.3	378	5.6	8.9		9.9	-7.8	55.7
80.5	0.4	25.1	3.6	204.9	-0.5	3.7		2.8	0.5	22.8
-2.7	141.6	5.2	3.8	265.5	-10.6	27		-2.1	8.4	53.3
161.2	152.5	-3.8	-4.6	520	75	21.5		192	0.2	45.8
605.3		-1.6	25.7	-4.4	29	42.1		253.4	-3.5	1.1
64.5	20.6	70.2	0.8		2.2	6.5		922.3	-0.6	-0.6
136.8	120.5	217.2	22.5	708	21.6	-8.5		-6.2	4.4	0.4
141.2	-0.9	11.2	-4.9	-0.8	27.2	16.2		660.7	-1.5	81.4
81.4	240.5	159.6	33.5	21	7.9	-13.5		68.2	-0.2	250.9
103.5	4		104.3	-0.7	25.6	381.2		487.3	-8.5	137.2
42.5	0.8	181.9	-3.8	399.8	-3.6	104.5		451.4	-7.8	42.6
163.9	-0.5	151.2	0.3	-3.9	21.8	47.3		642.5	-3.1	-6.1
138.8	-7.7	-2.8	1.2	-5.5	4.2	24.5		18	-0.8	137.8
136.2	110.8	147.3	-4.7	114.7	10.4	18.4		-26.2	-3.4	-5.5
-1.5	153	276.4	3.3	4.3	39.9	1.1		156.3	69.9	-1.2
126.9	-4.7	11.7	0.3	43.1	12.8	45.5		-17.8	-16.1	149.4
13.2	-4.4	374.5	5.8	144.5	12.2	10.5		685	-4.8	39.1
62.6	66.9	208.5	-2.2	179.5	-13.5	162.2		1295.8	48.5	-3.3
5.9	-5.5	138.3	54.7	-6.2	-0.2	102.3		37.8	101.2	9.8
-0.5	126.5	149.7	6.1	20.1	22.4	8.5		48	11.5	-0.2
225.8	176.7	151.1	6.3	132.5	1.6	4.2		1.9	74.6	-7.8
-5.7	93.6	233.6	-2.2	158.1	-4.6	500.5		860.3	1.9	143.6
2.7	-1	111.3	2.9	121.8	2.5	83.4		12.5	16.5	239.7
-0.5	-2	230.5	-3.3	164.8	89.4	246.6		-7.6	3.1	308
273.8	52.6	165.2	1.4	-11.1	53.1	242.5		1.4	-1.8	46.6
0.3	0.9	239.4	0.6	-14.4	69.4	-40.1		-3.9	33.8	155
1.1	84.2	181.6	-0.2	144.8	13.4	354		562.5	-2.8	69.5
-0.1	109.7	108.9	5	97.5	-3.2	1.4		5.2	55.2	142.8
-1.8	122.2	114.9		111.8	21.8	22.6		4.2	-4.4	88.5
0.5	303.2	142.8	49.3	-13.8	16.3	63.6		5.2	0.9	252.2
111.3	2.4	278.4	8.9	518.8	1.1	161.4		593.6	-3.2	-0.8
3.9	164.8	97.9	42.5	156.7	149.9	63.6		1.8	5.7	84.8
5.6	171.4	-1	-10.7	52.7	-15.8	-3.7		-1.9	5.4	61.4
8.6	6.5	0.6	-11.3	96.2	81.5	681.6		11.3	2.3	64.1
5.8	3.2	246.5	100.5	89.2	40.2	187.7		454.6	-3.5	213.7
281.6	313.9	48	1.5	259.3	2.8	90.5		3.9	-7.2	48.8
0.8	538.6	159.8	74.9	162.9	25.8	16.2		386.7	-18.3	139.8
2.5	-2.5	3.5	6.2	117.3	31.8	131		406.7	27.7	166.1
245.2	4.1	-2.1	-1.1	52.8	-11.2	333.5		9.5	3	73.9
-0.8	92.6	-3	87.5	75.7	-19.1	235.8		156.2	3.4	54.3
-1.7	58	274	329.4	131.8	33.3	17.2		0.2	3.2	69.5
282.6	39.4	371.6	-0.8	94	40.2	78.8		-5.5	-2.2	93.2
-6.6	346	164.5	4.2	113.1	46.5	43.3		253	-2.8	3.8
-0.2	120.2	299.5	41.1	131.2	10.8	1786.2		929.4	-3	12.3
0.5	120	291.8	9.6	482.5	3.2	410		73.8	10	0.8
22.4	113.7	3.9	0.8	277.8	255.7	109.6		447.3	0.3	10.7
-0.9	31.5	334.8	18.8	365.2	-6	4.2		13.3	-0.8	129.9
5.4	-5.2	20.2	2.6	164.3	-9.5	415		356.9	8.2	88.4
141.1	100.7	233.7	6.1	8	5.7	88.8		-2.5	-10	4.3
210.3	72.8	273.9	44.5	81.4	3.2	72.2		197.2	-3.8	0.2
-2.2	22.4	-6.2	63.8	5.5	-3.8	34.3		-3.6	6.4	50
134.3	35.8	384.8	262.8	0.2	0.5	29.2		310.8	-2.6	-4.2
5.6	29.5	3.4	14.5	263.4		278.5		6.8	-6.8	3.3
134.5	20.9	326.6	-4.9	147.3	0.2	256.6		-7.2	-2	-4.5
-4.2	112.5	-3.7	12.2	167.2	0.5	736.8		612.9	5.3	91.4
-2.5	3.2	222.4	0.6	67.4	-2.4	429.5		582	-9.6	69.2
3.9	161.8	410.7	-5	175.3	-3.4	3.8		437.8	-10.1	1.9
12.2	-3.6	315.5	107.2	125.1	-0.1	119.7		3.3	-0.6	169.1
1	66	387.8	1.5	113.3	-6.8	-5.8		-9.6	-1.7	0.5
105.5	7.4	270.7	-2.3	113.6	0.1	474.8		1.1	-3.5	-4.8
124.8	23.8	281.4		177.5	0.3	313.5		6.9	1	224.4
109.5	68.8	235.4	-0.3	295.9	-2.9	70.1		73.2	-4.1	63.3
176.6	1.1	327.3	67.7	192.3	-13.8	373.5		199.5	29.2	-9.8
150.2	12.8	14.8	-4.9	-26.5	17.6	79.6		100.9	-3.6	-8
130.7	-1.8	170.9	38.3	120.8	22.4	262.9		179.8	17.1	18
90.7	2.2	1.3	44.5	237.6	-9	130.5		8.2	0.1	6.3
1.5	-7.8	203.8	5.5	272.9	2.6	172.7		292	10.2	-2.8
-2.1	-2.7	117.4	-0.8	285.9	-3.2	221.2		496	5.7	12.7
2.3	55.1	4.1	125.3	259.2	-6.2	308.2		359.7	-8.6	46.9
4.6	80.2		-21.9	160.8	12.3	405.8		122.4	126.5	185.2
-12.9		134.4	63.9	2.8	5.5	26.4		-4.5	-8.1	18.8
-0.8		70.8	51.8	23.9	-8.8	43.8		0.8	-1.8	3.5
6.3		86.1	41.8	238.8	-4.3	-11		147.8	1	-0.2
		55.2	-0.8	78.2	-4.5	102.5		164.8	4.1	7.2
1159.7		160.5	83.9	115.5	3.8	16.2		241.1	3.8	6.2
45.6		92.9	-4.9	213.8	-2.9	635.5		5.2	6	2.6
1154.1		103.5	94	120.9	431.2	455.2		244.1	-0.5	-0.7
-18.9		114.8	34	301.5	-10.9	67.6		280.6	1.3	91.2
1073.5		98.3	7.8	214.8	-1.2	-1.5		9.2	-9	84.2
654.3		144.1	-0.1	5.7	-2.2	9.8		342.1	-3.5	130.4
-7.5		165.6	29.3	7.3	8.5	-7.6		94.2	8.2	50.9
1053.3		1.8	1.7	145.6	16.6	316.7		131.1	3.8	-5.8
954.2		71.1	8.9	90.5	0.8	88.8		8.4	6.2	4.2
7.5		67.7	-17.5	1139.8	4.4	216.8		214.7	-7.2	-15.8
1277.1		-1.7	1.2	92.9	1.4	19.1		163.5	-9.2	0.7
2938.3		2.1	6.4	179.3	301.8	138.5		4.8	-12.5	3.4
607.7		163.2	4.8	162.5	2.7	-2.1		60.2	-3.1	1.5
787.9		145.1	-10.4	174.6	300.2	108.3		187.8	2.2	58.2
1409.2		51.5	18	183.2	4.9	80.6		25.8	-1.8	13.5
701.7		63.9	-2.5	195.2	27.2	-6.4		504.4	15.4	19.9
1306.4		65	7.6	-17.2	11.5	-9.8		10.9	21.5	-2.5
-12		82.3	8.5	150.5	2.3	0.2		67.6	1	51.2
-83.1		-2	0.2	286.5	10.6	42.1		285.5	78.8	55.2
444.4		128.2	-18.2	132.4	-8	-0.9		-2.8	0.1	10.4
1445.6		82.6	62.2	-1.8	11.8	-4.1		358.6	-0.5	-1.8
1226.3		71	107.5	109.4	226.2	180.9		8.9	2.7	5.4
-6.4		35.4	14.2	-3.5	204.9	5.2		273.6	-2.8	-0.8
734		33.8	13.6	130.4	2	0.9		4	-12.2	-1.8
16.5		43.5	247	8.2	372.8	3		-6.2	31.5	87.5
-33.6		22.1	72.6	121	7.3	278.3		-1.6	-0.4	77.9
26.2		36.2	139.9	368.6	3.8	413.6		-6.9	1.5	19.5
-3.1		47.1	180.5		319.8	326.8		-7.4	0.8	56.8
86.1		33.2	14.2	275.7	4.3	174.9		-3.3	-2.2	0.5
812.5		90.5	15.8	230.8	-0.3	192		-4.1	6.8	-6.8
794.3		-2.4	-5.8	-26.8	17.5	50.2		367.9	-2.9	-2
1320.7		46.8	-15.3	172.4	-1.5	489		198.5	7	4.9
714.2		80.4	112.2	216.8	4.8	31.2		183.8	11.1	89.7
803.2		62.8	92.7	2.8	129.5	512.4		236.2	3.2	114.3
1030.3		27.3	130.3	129.5	-4.1	352.1		-0.4	-1.8	41.2
752		161.8	52.8	190.4	33.9	104.3		26.3	-7.2	114.1
560.5		38.3	74.8	134.1	-8.7	702.6		17.8	4.8	3
539.2		103.2	242.7	7.8	8.5	3.9		-11	42	108.4
499.1		41.8	90.9	603.9	6.4	310.1		182.6	-1.2	261.1
1328.6		42.2	1.5	103	-0.3	634.8		15.5	3.3	-12.6
379.5		60.5	113.5	109.2	4	119.8		157.3	7	11.6
868.6		136.4	75.5	386.5	4.8	-6.2		214.9	5.4	76.1
665.9		32.5	6.7	197.9	4	412		109	-5	-4.6
647.9		37.2	49.2	76.8	13	120.8		1.4	-9.2	13.9
753.1		0.7	57.3	17.6	0.2	70.7		20.6	0.9	6.2
354		85.2	28.1	-100.2	-3.5	373		22.2	0.9	0.8
564		49.5	9.5	168.6	8.8	245.8		46.3	0.8	-3.3
890.7		65.9	135.2	188.5	5.8	371.4		-12.6	4.5	-5.5
-48.6		4.6	64.4	-4.1	-9	749.1		32.2	9.1	100.7
899.5		174.7	67	154	1.5	333.3		53	-3.8	52.7
946.7		47.2	48	43.3	-8.4	-1.5		129.5	-6.2	257.2
		55.8	49.9	297.2	5.5	119.6		111	2	8.5
176.9		39	158.4	377.8	4.7	0.5		49.1	1.6	226.8
94		117.1			12.1	39.5			1.1	340.2
139.4		96.5	19.4	144.7	0.7	110.9		46.6	1.3	269.4
176.1		-3.6	7.5	108.2	3.2	134.6		257.1	0.3	298.3
193.6		32.3	102.2	8.1	8.4	305.2		2.2	-7.2	-11.5
4.7		49.2	4.7	186.4	-6.1	-2.2		107.8	7.8	2.9
266.2		4.9	132.5	53.5		22.2		-8.5	-14.3	-10.1
242.2		-5.7	22	80.4	-6.5	305.1		96	6.1	-5.1
-5.1		29.8	0.1	47.9	-4.8	148.8		28.4	-6.1	-5.8
183.9			41.6	138.5	5.8	389.2		14.5	-2.8	33
286.5		257	22.4	38.5	16.8	87.4		7	-4.8	0.1
1		165.6	35.1	70.9	-8.3	-87.2		24.5	-8.5	177.2
276.7		266	11.1	3.4	-167			17.8	4.7	192.9
1.4		295.1	18.5	60	-8.7	1149.7		50.7	1.2	254.3
150.6		-12.2	-2.8	8.9	-8.8	614.1		-1.4	3.6	3.2
152.2		234.6	8.4	-0.1	82.2	409.7		6.3	2.8	0.9
228.8		515.6	-0.4	2.6	-55.8	851.2		18.8	-1.9	270.3
254.6		-8.3	28.5	142.4	-5.6	272.2		0.2	3.6	205.3
220.2		283	13.7	120.5	23.9	-7.4		44.7	-6	-20.3
294.2		352	11.3	213.8	120.6	2.1		46.7	-15.9	123.9
242.7		199.1	33.8	1.5	7.9	467.7		-5.1	-2.3	18.8
4		548.3	3	80.5	90.3	878.2		-2.5	7.5	289.2
202.2		115.9	36.2	-1.2	2	495.9		21.5	13.5	388.5
179.4		477.6	21.8	103.1	0.2	453		409.3	3.1	294.9
160.2		-17.8	2.2	-2.6	34	1018.7		80.1	-19.8	0
214.9		16.5	-1.3	-0.2	91.3	-3.3		-6.4	-18.8	2.4
432.2		92.3	2.6	346.2	7.5	1469.8		60.9	-5.1	2.2
314.2		407.2	22.5	66.4	5.9	817.7		134.7	40.4	21.8
164.2		251.5	-2.5	170	123.2	39.2		-2.4	-4.2	8.3
163.7		619.5	24.5	61.3	30.9	1347.8		-1.9	-12.6	34.6
-1.5		17.2	51.5	81	160.5	862.9		11.2	19.4	200.4
141		522	7.8	40.7	17.8	1.2		397.8	32.3	51.5
202.6		266.6	20.5	151.3	10.5	1068		136.5	2.8	193.6
368.6		0.2	49.8	25.8	-8.2	18.1		69.8	5.2	16
98.2		1170.8	-0.8	46.8	1.9	-16.3		7.2	2.8	7.2
117.2		637.3	-6.2	105.2	53.5	573.3		5.7	-34.4	37.3
56.7		0.6	38.7		17.5	354.9		443.7	117.5	0.2
4.5		294	30.5	133.6	0	783.3		22.5	8.5	256
180.7		209.6	27.1	-5.1	-4.8	1530.1		726.6	-37.5	521.4
0.7		260.5	4.1	492.4	52.9	1002		8.5	-3.9	29.6
195		833.9	40	3.8	15.9	583.7		290.5	4.4	355.9
-1.1		818.8	76.2	-2.1	22.9	1326.5		1.1	-0.1	-2.2
479.8		-10.4	45.2	142.4	84.2	612.4		18.1	1.2	25.7
111.7		-14.7	-1.8	-2.3	-5.4	950.8		3.5	-14.8	38.5
12.2		76	-2.3	-9.8	0.3	258.6		-5.1	103.5	306.9
147.8		98.3	3.2	-4	-16	494.8		4.6	7.1	-4.1
131.5		22.8	12.5	19.8	26.2	565.3		-1.4	-6.1	6.9
-5.6		-23.2	23	306.3	30.1	425.9		14.2	7	451.8
73.1		89.9	15.4	194.5	97.1	911.8		-10.8	-14.6	204.5
100.2		16.2	5.2	-21.1	54.1	958.5		10.7	21.2	3.2
0		-8.9	37.7	-20.6	-6.8	592.8		227.8	-2.6	78.8
152.2		479.7	32.8	376.2	5.6	1362		7.3	1	126.8
368.2		384.9	24.5	262.2	40.9	1730.1		357.8	4.2	217.2
69.8		266.2	52.1	35.5	-0.1	276.5		345.3	13.8	50.4
169.2		299.5	50.6	236.3	-5.5	11.3		439.7	52.2	-2.1
238.1		274.3	6.2	331	-15.8	740.1		0	-58.3	45.5
19.5		-5.3	2.7	-24.1	19.9	824.7		438	115.5	126.8
-1.4		318.4	11.5	478.1	-38.8	443.3		1.5	-0.9	282.8
119.8		464.4	2.7	543	-0.2	435.5		19.4	2.4	394.2
		434.3	99.2	151.2	-3.8	144.2		223.8	5.8	25.8
188.8		213.5	0.2	231	37.7	885.2		7.6	7.8	54.6
71.8		14.2	-4.8	178.2	119.4	347.1		229.3	0.4	15.7
116.7		274.9	2.8	46.5	6.2	929.2		236.2	-1.2	16.8
40.2		-31.4	3.8	413.7	14.7	-91.8		614	-1	87.8
-10.6		227.6	-7.6	371.5	2.5	627.2		480.2	-0.8	396.9
435.2		-3.7	36.5	326.8	-16.5	92.7		556.5	-1.8	-1.9
-0.2		328	54.3	369.4	-3.8	22		479.2	71.9	-3.6
8.3		447.8	77.8	120.1	16.2	573.4		-4.1	5.2	654.2
127.3		5.2	-0.2	-4.5	16.2	-57.2		-15.1	25.5	-14.4
206.4		343.1		-57.3	5.5	-3.2		519.8	-26.1	10.4
259.6			-1.8	272.2	7.3	-7.3		215.6	414.3	17.5
165.5		450.2	77.2	176.7	-1.6	146.4		-8.6	3	97.2
309.5		-4.1	-7.3	154.2	6.8	385.3		10.9	62.2	-17.9
205.3		187.9	85.6	371.5	4.9	660.4		272.1	1.3	118.5
316.6		437.1	48.9	390.8	-11.8	4998.2		10.3	38.3	-4.2
422.5		316.5	145.9	285.1	1.4	198		-0.8	-2.5	28.2
102.4		221.2	93.1	325.2	-1.6	134.6		-21.9	108.4	11.7
13.5		592.7	108.8	-49.7	-13.3	-10.7		270.6	103.2	36
279.2		517.1	147.4	337.6	6.6	409.7		-21.3	87.1	-2.2
195.5		351.3	165.5	195.6	4.4	802.2		354.2	-10	45.6
61.8		380.3	-6.8	160.8	42.1	997.2		11	-5.6	-21
106.3		-5.8	101.3	12.8	-3.5	763.1		182.4	-30.8	25.7
64.3		465.5	3.9	292.5	0.5	391.5		303.5	102.3	48.3
37.2		106.5	66.5	6.6	9.2	50.1		-11.7	208.1	30.5
6.7		374.5	196.6	174.5	1	-130.4		-0.5	3.2	-1.1
16.8		385	164.3	-10.5		6.5		262.2	-19.6	18.6
49.5		482.9	75.4		12.1	3121.2		293.6	6.8	36.5
4.3		694.3	97	333	91	884		331.5	-1.5	33
63.6		311	-28.3	155.5	58.2	1053.2		254.7	-30.2	2.7
84.5		161.9	3.7	-8.7	0.5	12.8		-13.8	-4.8	25.8
-1.5		33.1	166.9	2.8	-1.5	431.3		-5.5	-11	2.3
171.5		416.9	28.8	-10.9	23.2	1221.5		-0.6	-21.7	35.7
-8.2		595.9	4.8	-30.8	10	167.3		3.2	-6.9	6
-0.2		58.4	91.5	292.8	-2.9	852.5		1.2	-4.3	-2.3
66.7		-22.5	117.5	10.5	19.8	573.5		-2.5	44.5	31.8
47.2			-3.7	368.5	7	390.6		130.8	44	1.9
64.5		536.8	153.2	256.1	60.8	764.3		3.5	-22.1	1.6
94.7		522.5	-1.2	230.2	46.4	1498.2		-41.5	-2.9	37.1
38.5		5.8	13.2	4.2	10.4	995.8		-7.2	4.5	60.3
383.7		358.5	9.1	-4.5	-0.1	183		13.2	-3.7	110.6
38.7		375.2	85.9	265.8	-12	792.8		10	-3.2	70.4
258.5		272.9	88.2	131.7	39.6	1107.1		0.8	-6.2	58.9
265.8		183.2	163.3	278.2	42.3	167.8		227.1	-3.4	12.2
116.1		2.3	-13	283.5	-1.7	454.5		-1.2	1.8	-20.8
54.9		6.5	292.1	220.5	15.5	769.5			-3.5	120
228		409.5	5.5	538.5	23.3	693.9		0.8	-9.9	-4.5
112.9		408	111	525.2	46.8	17.4		-2.2	3.2	-7.8
54.7		268	404	301.2	144.2	766.4		673	-2.9	-38.8
117.4		459.1	0.5	151.4	193.3	721.8		14.6	15.4	157.1
48.6		9.2	112	610.7	-7.8	-12		2.5	-14.2	151.9
133.6		179.3	73.8	102.4	214.5	452.3		555.9	-2.8	112.8
415.5		672.5	25.7	14.2	-3.2	606.9		9.1	1.3	-20.8
3.7		444.9	58	253.9	9.8	21.3		508.2	-12.8	-22.2
105.4		101.7	3.2	-16.1	19.5	286.3		2.6	-96.6	27.2
21.4		4.2	-18.6	153	103.8	185.7		8.5	40.2	47.9
-9.7		744.5	-10		-7.8	338.9		-1.6	-16.5	1.4
0.8		853.9	27.8	11.9	5.3	0.5		-4.5	51.6	4.4
6.2		373.7	5.4	5.3	28.5	237.3		481.2	14.3	-24.2
83.2		185.8	-0.3	132.8	56.7	463.3		-3.5	-2.4	3.5
56.5		-5.2		256.5	13	631.8		44.1	9.2	104.3
60.5		5.9	150.8	238.9	3.5	-18.8		661.4	0	9.1
41.8		5.2	72	202.3	-42.3	14.5		39.8	0.3	80
14.2		-5.9	14.8	-7.6	-6	521.6		283.2	7.3	33
295.3		30.3	419	271.1	-10.9	-74.2		242.6	-3.2	42.2
-21.2		523.5	-8.1	5.5	-19.7	418.5		250	7.4	38.6
53.9		-1.9	103.5	-7.4	-10.8	-5		356.1	-3.8	-72.2
217.6			161.3	225.7	7.5	77.5		-2.5	3	-13.4
129.2		44	306.2	174.5	14.1	-22.2		-3.9	1.2	-5.9
0.2		2.4	75.1	85.2		238.8		309.5	6.1	18.5
5.5		58.8	6.2	214	-2.5	4.7		16.9	10.4	16.8
47.9		35.5	-44.5	165.7	-15	-8.5		401.8	-4.7	90.7
-23.2		73.2	53.4	559.5	1	98.1		-1.8	1.5	87
325.2		5.1	11.5	171.4	7.2	0.2		66.5	-6.2	112.9
471.5		-6.3	101.2	-2.7	5	2.9		531.4	1.5	10.2
0		101	147.3	-9.2	3.2	239.3		653.7	8.3	2.2
312.8		219.4	311.1	169	-7.5	-12.3		-4.8	-2.8	33.1
-0.5		-11.8	58.9	6.4	3.2	11.8		-0.2	2.9	180.9
-9.1		67.8	-6	-14.5	1			202.6	-4.5	114.8
6		116.6	445	424.4	-4.2	554.4		3.8	334.7	120
218.4		33.4	210.5	19.5	-0.7	-0.4		325.5	7.9	27.5
498.5		-2	21.9	-11.2	-3.4	-2.8		530.6	-19.7	-57.2
321.4		56.6	146.8	136.5	-3.9	241.2		556	-7.8	13.2
371.4		26.5	95.9	102	2.2	297.5		3.4	14	-1.7
1.5		-30.6	147.3	-4.6	5	353.4		12.4	26.3	137.5
482.2		-37		93.5	-3.2	176.3		2.6	2.1	-17.5
470.7		88.7	0.5	349.1	0	224		459.3	7.2	25.8
222.7		-23.9	224.2	25.5	-0.2	9.1		395.5	7	-2.7
170.8		139.2	162.2	168.4	2.8	343.6		455.7	-3.4	-2.6
-9.7		135.5	24.8	90	6.9	298.4		519.8	-6.5	26.5
		153.1	101.6	195.3	-1.2	0.4		301.7	4.8	-106.4
5.3		-66.5	91.1	246.7	-0.3	387.9		269.6	-3.8	-13.8
4.4		414.2	-19.9	-4.2	0.3	399.5		373.4	7.6	63.2
263.7		97.4	390.5	-4.2	1.3	-6.3		440.1	6.2	-105.1
2.7		9.4	372.4	9.2	23.2	-12.8		12.3	0.3	-6.2
186.9		75	402.5	127.5	40.3	7.4		2.2	7.5	79.7
-3.1		24.8	405.8	-0.5	-7.8	350.8		481.8	9.1	-0.5
328.2		65.5	-2.6	-1.6	-0.5	841.2		307.2	0.3	-4
280.8		46.9	4.5	-8.6	0.8	45.5		620	-8.2	5
1.8		81.7	90.5	109.5	-2.4	5.2		365.8	-5.2	-8.7
145.8		-0.4	214.6	124.2	-7.8	-7.8		222.1	19.5	88.8
281.2		1.9	1.9	7.7	5.2	-5		10.3	-5.1	83.3
339.7		163.3	124.1	275.5	-3.7	-11.6		304.9	-1.3	57.5
9.8		55.4	384.1	122.8	168.1	251.4		634	-0.6	34.2
221.7		90.2	101.7	2.4	52.5	-21.7		276.3	6.2	74.5
154.7		56.2	158.4	168.7	2.7	768		142.4	-0.6	-3.1
229.6		-2.2	372.3	234.2	0	291.5		414.4	-5.2	83.6
547.5		35.9	-6.5	-0.5	40.1	562.3		638	0.3	68.6
40.3		27.6	-7.4	166.3	-1.9	478.4		297.2	-0.2	10.1
3.5		93	184.3	185.2	-0.6	367.4		1	-10.7	11.5
266.5		-7.4		64.8	-3.8	40		0.2	7.2	38.9
285.9		137.6	4.3	-8.3	-6.5	524.7		4.1	-13.2	30.2
241.3		222.4	2.5	-12.8	-2.6	-106.5		326.5	0.2	23.7
198.1		68.1	-2.2	213.3	29.5	272.3		0.9	-12	6.8
206.9		1.8	60.8	110.2	5.8	236.2		157.5	-2.5	-2.3
159.8		3.6	3.7	-14.5	0.5	442.7		348.2	-0.5	50.2
252.8		68.7	104.2	164.8	-3.2	433.7		58.5	6.1	-4.3
152.5		24.9	-8.5	76.2	-6.2	364.5		243.2	52.5	55.3
170.5		119.9	10.2	240.6	-5.8	44.8		328.5	-9.1	-2.5
235.3		25.2	118.9	92.1	12.3	94.6		741.9	20.8	24.2
126		212.2	5.9	243	4.3	250.5		415.9	-4.3	-0.6
172.4		26.4	118.2	29.5	3.2	308.9		-5.6	-4.8	20.9
200.1		31.9	32.6	3.2		237.5		231.7	7.8	15.3
234.2		68.2	49	1.4	-5.1	227		323.8	-2.3	21.1
263.5		67.6	12.7	172.1	5.7	627.3		360.5	8.8	25.5
182.5		122.7	7.9	0.5	-7.9	126.5		-2.1	-2.6	34.2
172.2		7.3	-19.3	0.1	9.5	-16.2		31.8	-3.8	76.9
416		6.5	180.7	8.5	7.6	272.5		463.9	1.2	27.7
-1.6		128.2	30.3	-35.5	69.2	223.1		800.1	-3	-2.3
-2.5		-14.3	102.8	575	155.4	823.8		409.2	-3.7	20.3
93.9		-12.6	48.5	427.3	-3.8	367.7		512.5	-4.8	66.1
285.6		294.5	104.2	219.5	37.3	896		-7.6	31	59.7
133		91.7	139.5	309.1	10.8	4.8		555.9	64.5	1.4
-1.2		-5.8	-16.3	156.1	39.8	20.8		430.2	-8.1	52.7
96.8		-1.2	-22.2	113.1	-19.2	-3.8		259.6	-6.5	106
-5.4		86.7	-70.3	80.2	-77.2	115.8		585.4	4	7.8
192.8		0.2	-24	4.8	-3.8	362.2		8.6	6	0.2
205.4		126.8	50.6	0.1	11.8	363.4		410.7	28.6	4.5
51.5		35.2	32	12	2.2	-580.8		78.1	2.5	20.2
410		100.9	1.2	179.5	-52.6	1331.7		-5.8	-8.2	-0.4
219.2		-1.8	9.3	110.8	1	29.7		0	-3.5	21.8
230.5		-10.8	0.5	156.8	-4.8	412.9		-2.4	14	48.8
388.6		172.1	0.7	248.1	-53.3	169.8		400.9	-8.4	2.2
2.2		-0.7	6.9	88	33.5	2.4		377.6	5.6	66.5
198.8		-8.6	-106.2	144.5	262.9	124.7		270.7	-5.4	0.2
201		29	126.3	-2.6	-23.9	158.3		3.4	2.5	6.1
192.5		157.5	-1.4	-4.2	52	196.5		-0.5	17.6	28.5
207.1		9.2	-17.5	196.5	67.4	-36.9		165	2.4	17.8
231.8		130.2	-0.5	0.3	116.8	1220.6		258.2	9.7	3.1
239.6		41.9	-1.5	123.2	8.8	220.8		651	0	16.7
0.2		139.8	81.3	-7.1	3.6	279.8		349.8	24.2	-2.4
126.5		73.9	12.6	54.6	134	204.9		446.8	-7.3	30.8
202.2		-4.7	1.2	131.6	37.7	65.4		-0.3	-6.5	16
101.2		99.3	188.5	192.3	438.4	116.6		201.9	-8	35.4
-4.4		-7.2	60.3	0.1	86.8	143.7			-3.2	156.2
13.1		7.5	-4.8	131.8	43.2	0.8		-0.2	10.4	15.5
432		93.9	12.8	92.1	287.9	221.8		21.8	3.5	57.2
186.6		3.7	78.8	63.4	10.8	245.1		-2.8	162.5	11.3
245.4		-0.2	-3.4	207.8	53	132.8		5.6	-4.1	-0.6
200.7		52.7	46.2	96.2	38.2	362.9		4.5	0.9	1.4
143.9		33.2	65.7	-0.1	-16.5	123.2		5.2	1.1	38.8
-5.7		86.9	24.7	55.5	-32.4	120.2		86.9	2.7	29.9
245.6		15.6	-2.2	128.9	46.9			6.5	12.8	6.8
0.8		-5.5	3	-15.3	0	-12.2		9.8	123.2	25.5
134.5			19.8	108.8	82.4	-14.9		-13.2	1.4	1.6
199.9		74.3	21.1	91.4	131.5	0.4		0	-0.3	240.7
-1		-7.6	-3.8	245.2	12	344.8		8.4	-1.1	10.1
-0.9		180.8	-23.6	83.1	-15.2	1002		2.1	3.8	9.6
211.8		84.9	8.1	65.2	-1.2	337.8		49.7	-0.6	4.5
13.9		131.8	10.9	155	-9.5	1061.2		53.4	4.1	15.8
		11.8	-27.6	-5.8	67.5	720.8		3.7	-11.3	-12.2
		297.8	40.5	-9.7	48.2	702.1		0.5	-3.4	287.8
		-32.7	59.8	116.5	145.2	898.5		6.7	-3.5	-0.2
		433.4	133.8	57.8	-4.5	771.1		1.7	5.5	5.7
		228.8	-9.9	20.5	91.2	883		3.8	2.2	121
		110.3	-16.2	108.8		360.7		37.8	-0.7	-2.4
		221.7	-2.8	64	-5	440.2		44.5	1.3	35.7
		191.8	25.5	161.9	228.6	294.2		57.4	-5.5	-5.8
		225.4	-18.2	55.8	-28.2			2.5	28.2	211.4
		78.2	13.3	152.6	-24.5	208.9		1.5	6.9	9.8
		105.8	-3.4	40.8	19.6	481.5		1.5	-7	353.9
		91.7	75.2	121.7	-0.3	680.2		2.2	1.2	-5.6
		-6.2	10.9	138.2	-41.6	143.4		4.7	-7.9	15.2
		231.7	13.4	245.2	26.2	56.2		10.2	-9.6	-4.5
		113.9	-2.5	43.9	-1.2	399.3		90.5	8.9	23.6
		102.7	10.8	1	26.3	465.9		66.2	-0.5	32.1
		8.1	2.2	234.6	0.2	211.8		174.7	-9.2	-5.3
		216.5	-2.1	217.2	-1.5	-4.2		56.8	-7.1	90.8
		213.9	-8.8	127.6	114.3	145.3		16.7	-4.2	-3
		145.2	0.2	169.3	19.5	143.5		185.8	0.8	0
		370.2	-2.2	39.5	-5.3	218.1		-0.2	95.5	25.8
		15.8	10.2	-1.4	2.9	112.5		-4.2	-5.3	1.7
		55	1.7	217.3	-17.1	172.5		-2.7	-2.5	10.8
		217.1	0.2	42.7	6.2	119.4		128.3	5.8	7.5
		0.9	1.9	65.9	6.5	287.3		47.1	-4.2	-5.9
		108.5	-7.5	81.5	2.6	46.1		25.8	-5.2	3.1
		420.1	-4.5	99.2	-11.8	19.8		5.2	-8	145.8
		84.8	2.3	252.8	-62.1	476.8		26.5	-4.1	50.5
		235.3	122.2	299.6	132.8	250		39.8	-13.7	76.5
		45.4	36.6	6.4	13.1	8.2		40.6	12.3	-1.8
		48.5	-8.1	93.4	337.6	236.1		81.8	-12.5	15.6
		112.5	-2.5	62.9	114.7	0.5		48.6	-0.8	12
		139.6	8.9	114.2	-2.1	298.9		67.5	0.2	-2
		50.2	2	92.5	-68.7			39	6.5	38.8
		178.3	0.4	2.3	366.2	747.4		-1.2	63.6	33.7
		-5	129.2	174.8	35.4	464.1		24.2	-4.6	-1.4
		144.6	-5.5	121.1	-16.6	143.2		2.4	6	-7.7
		57	-4.4	63.2	13.5	-53.2		2	-2	34.9
		17.5	3.2	74.5	-59.4	482		10	-1.9	-13.9
		16.8	11.9	1	114.2	377.3		-1.2	-2.8	7.3
		72.4	-28.8	0.8	321.5	208.8		104.5	14	5.9
		30.8	-0.1	4.2	-4.7	220.6		55.6	77.5	-2.1
		103.8	-2.7	37.5	122.1	112.4		82.3	1.1	5.5
		25.6	-3.2	50.2	72.1	-11.1		1.6	-2.5	5.4
		85	105.2	51.8	-74.4	11.4		-1.5	-3	5
		269.4	-4.8	-4.8	49.2	340		100.2	-2.8	5.1
		76.7	61.5	98.5	271.6	103.1		51.1	15.6	-0.8
		8.3	48	-4.9	32.3	164.8		66.5	167.9	2.8
		68.7	4.9	76.6	31.3	707.9		29.4	-4	-0.6
		62.6	42.9	41.8	282.3	261.7		33.8	-1.8	3.8
		119.1	-4.4	70	-6	154.7		45.5	-3.4	3.5
		109.7	-3.5	-8		492.8		66.9	53.4	23.8
		0.4	34.2	98.7	8.5	597		5.8	44.6	0.5
		108.4	-0.2	83.8	12.8	122.9		-7.5	20.5	1.4
		2.8	69.9	119.7	0.4	-3.4		58.2	-14.2	-4.9
		61.5	66.4	116.6	16.3	203.6		6.9	88.5	32.7
		29.8	98.8	13.1	5.9	323.9		35.2	5.9	-11.4
		58.3	-3.8	10.8	0.5	80.5		4.1	-1.3	-2.2
		62.2	1.7	99.4	-13.2	214.5		52.8	-44	-4.3
		-2.7	5.8	118.2	330.9	297.8		4.3	3.3	-5.5
		19.9	-1.6	192.4	1.3	434.2		-2.9	7.6	4.6
		40.6		94.5	0.6	86.5		46.2	-1.5	18.7
		0.7	106	398.6	-9.6	85.9		29.2	97.2	-6.2
		85.2	7.2	62.7	-4.6	167		25.8	14.5	34.8
		-0.9	23.2	33.4	8.3	-95		-4.2	-11.2	7.2
		8.2	143.7	4.7	1.5	100.8		46.2	-16.8	-2.8
		74.3	16	51.5	5.3	192.4		116.2	28.9	3.5
		89	-25.5	129.2	5.8	133.1		-0.2	-19	3.8
		72.8	108.9	118.5	-1.8	384		47.8	-62.7	70.4
		5.5	23.1	199.1	-19.7	391.8		-3.2	1	-0.6
		-11.1	88.5	0.2	17	140.5		98.7	-0.8	14.4
		16.7	0.5	122.5	3.4	540.2		17.5	-243.7	-1.2
		37.2	25.8	1.9	8.4	1062.5		3.5	-9.8	2.8
		45.6	1.5	88.7	7.2			55.7	220.9	-8.8
		-8.1	24.2	87.6	8.3	-0.7		58.8	-9.1	1.6
		22.5	1.5	46.8	8.8	188.8		91.9	32.5	0.9
		102.1	-0.9	106.6	-1.7	8.3		1.9	-14	14.4
		-10.2	247.3	135.4	2.8	69.8		43	-7.6	66.8
		154.3	105.2	27.4	28.5	1		-0.4	118.8	-0.2
		152.1	39.2	178.1	-1.2	206.9		28.7	4.5	1.8
		167.2	20.8	0	4.2	-5.2		76.6	-2.3	-5.5
		-1.9	3.9	3.7	-4.8	55.4		42.5	69.2	-2.4
		136.5	26.2	-3	-3.1	6.5		87.2	-4.5	-2.3
		66.8	-4.3	251.4	10.1	93.2		9.6	66.7	11.4
		0.2	56.4	73.9	3.9	93.6		41.6	12.8	1.5
		-2.8	37.3	3.4	3.8	112.5		5.5	220.7	50.9
		88.2	1.1	6.8	-6.2	17.8		44.5	29.8	0.8
		242.8	-1.5	46.5	-6.8	206.2		11.5	-8	68.5
		-7.2	61.3	93.9	2.4	111.2		154.8	3.8	53.5
		2.7	5.4	6.2	1.7	124.7		4.4	-5.4	-1.8
		218.4	65.2	-6.3	5.8	43.5		6.4	110.1	5
		-5.6	101.5	107	-4.2	106		39.5	-6	3.1
		5.9	64.5	-3.2	-8.2	106.8		114.4	-6.5	-3.7
		-7.3	51.5	115	7.2	137.9		-0.4	-13.1	-0.5
		182.5	-7.7	-6.2	-1.1	115.8		-1.4	-10.5	7.7
		0	7.7	-1.9	6.8	165.3		-2.5	21.3	5.4
		172.8	194.5	32.3	-7.5	2.2		-15.3	3.5	2.8
		-2.2	42.2	0.6	103.8	196.8		-6.8	126.9	-0.4
		0.4	123.4	98.2	13.8	217		-26.9	1.6	-2
		8	-10.8	56.4	8.2	106.2		-0.5	14.7	-0.2
		99.5	156.4	51.7	173.6	219.1		136	2	2
		-0.7	1.1	29.4	1.6	47.5		-0.4	-2.2	7
		3.8	-9.7	-6.2	-6.1	302		48.8	11.2	5.4
		38.7	73.4	85.8	2.6	307.3		142.9	116.2	24
		1.1	-1.6	57.8	4.7	257.3		-5.7	11.4	0.8
		-2.2	-5.4	2.5	4.1	388.4		2.2	-1.3	1
			45.2	18.8	9.2	195.3		93	1.1	1.3
			154.4	-3.9	10.5	76.8		14.9	124.5	12.8
			18.5	153.5	0.7	56		37.2	11.3	-1.3
			22.2	0.1	9.8	74.7		-7.2	-3.5	104.1
			92.2	114.9	-9.6	293.3		180.1	37.2	6.5
			49.8	36.2	1.8	299.2		114.2	3.7	17.4
			2.3	135.6	34.8	195.8		71.5	7.2	-0.5
			58.2	318.2	-11.4	236		0.1	7.3	66.2
			-5.8	207.4	5	71.5		72.4	0.3	27.7
			-6.6	103.6	-10.8	280.2		11.1	7.4	4.8
			10.5	3.6	0.1	153.5		84.9	-19.5	9.4
			4.9	0.7	-2.8	119.5		5.6	11.4	3.8
			84	98.5	-8.8	383.1		49.2	0.5	17
			24.8	-1.6	2.3	209.7		20.5	2	-2.6
			-9.7	8.8	52.5	325.9		0.1	1.1	23.7
			127.1	103.8	15.7	114.4		100.2	21.4	5.5
			60	217.8	-13.8	122.8		72.8	-0.2	34.8
			19.5	154.3	8.3	160.2		147.5	3.2	2.5
			-0.2	0	4.2	234.3		33.8	-3.6	3.5
			57.9	0.1	-5.5	119.9		74.2	13.8	58.5
			146	1.9	3.6	239.7		57.2	-1.8	3.5
			-28.3	125.8	-1.3	192.8		40.2	-8	35.9
			68.8	166.6	121.4	72.5		8.1	-0.6	76.4
			-1.8	113.5	-15	210.4		2.8	104.3	54.2
			42.5	52.9	3.8			64.8	-3.5	2.2
			134.7	-1.5	50.2	24.4		0.2	15.1	8.8
			13.8	69.8	58.4	4.2		1.2	-5	11.7
			1.2	9.3	7.6	21.5		33.7	46.2	1.6
			4.2	70.8	1.8	8.7		2.8	0	4.2
			42.2	2.2	12.4	4.3		91.5	2.7	7
			7.3	2.6	3.2	13.2		3.6	4.5	4
			95.5	0.3	-6.7	29.2		5.9	-1.9	6.7
			150.4	47.9	4.2	10.8		48.8	121.5	89.4
			-2.2	1.2	4.4	58.8		113.1	-4.8	32.2
			2	0.3	-5.9	59.7		45.8	0.3	-1.5
			113	154.2	-1.9	11.2		93.1	-2.6	2.5
			64.3	-2.4	-8.5	15.5		3.3	-2.1	10.5
			-43.6	27.4	9.8	6.3		1.3	-11.2	15.5
			99.6	89.6	5	-6.1		-4.7	-1	-3.3
			-37.6	69.9	-8.6	8.7		3.5	1.3	4.6
			69.8	-0.9	3.8	38.8		68.2	-15.2	-11.8
			44.8	37.2	2.2	15.1		-7	9.7	61.3
			-28.8	50.4	12.8	2.4		14.6	17.9	2.4
			-7.9	40.1	-3.9	63.2		1.3	55	9.2
			73	22.1	1	132.6		124.9	37.9	1.8
			-8.8	33.3	-5.3	58.4		113.1	0	1.3
			4.3	246.5	1.6	133.3		2.3	-2.3	1.4
			113.8	13.9	-3.1	40.3		136.4	2.8	3.2
			51.8	9.4	70.4	27.9		8.7	3.5	64.3
			65.6	69.4	11.2	115.4		78.5	44.2	98.9
			-0.5	66.5	7	90		7.8	-4.2	2.2
			1.3	61.5	3.8	8.4		-2.6	75.1	38.8
			79.8	100.1	-7.9	-5.5		-0.7	-9.4	3.1
			212.6	67	5.9	35.5		22.6	-13.2	12.9
			3.3	-11.2	11.4	-5		46.4	-5.5	25.5
			-8.5		13.6	9.1		62.2	-19.7	48
			77.8		-12.8	6.6		26.1	5.2	9.3
			73.9		-5.1	81.8		65.8	7.1	12.5
			91.5		4	83		63.2	36.5	39.6
			11.8		3.7	215.9		7.1	-1.8	-0.8
			3.7		6.7	89.5		677.9	0.1	3.8
			2.2		0.7	6.6		163.2	1.1	8.8
			-6.9		14	-45.1		-2.4	-4.8	36.1
			1		2	168.5		155.7	5.5	-6.9
			7.7		-10.2	45.1		116.2	260.2	15.9
			6.4		-11.8	26.3		88.2	6.9	6.8
			-4.2		-5.3	94.4		67	18.3	8.3
			24.7		3.2	72.2		-6.2	186.6	12.1
			62.1		7.7	29.3		9.8	-1	-0.5
			5.5		37.4	9.7		-0.4	407.4	17.4
			87.8		6.3	1.9		-12.3	-2.7	63.6
			-6.6		-2.3	217.8		3	4.8	35.3
			12.6		1.5	-30.5		-110.6	-5.2	27.1
			-5.5		-2.1	0.2		22.1	-4.3	45.8
			48.8		-0.5	84.8		17.5	2.7	0.5
			-1.8		14.4	5.8		14.3	-11.2	22.2
			6.7		-5.6	-6.2		1.7		6.8
			2.1		59.8	36.8		177.3		0.8
			5.9		8.2	-0.9		1.1		16.6
			8		4.9	35.5		77.6		28.2
			9.9		-14.9	-2.7		189.1		14.2
			4.4		11.2	6.8		115.2		45.2
			1.3		-3.4	-3.2		2.2		88.4
					12.4	2.8		4.1		20.5
					33.7	213.9		31.6		67.1
					-5.4	61		59.7		0.6
					61.1	-5.2		198.4		62.5
					-9.1	12.1		33.8		-58.8
					0.2	41.4		23.3		24.5
					-30.3	-3.3		-40.7		-6.5
					-3.9	29.8		-8.3		-7
					8	-25.4		44.4		-3.4
					5.8	-62.3		124.2		28.2
					-9.5	34.1		74.9		1.6
					-3.8	0.6		0.2		-7.4
					-62.5	151.5		-12.8		-1.8
					0.2	43.5		6.2		4.3
					1.8	3.5		68.5		-33.4
					-16.1	52.9		105.7		-25.1
					8	7.2		46.3		20.2
					-5.6	11		6.5		-5
					110.8	17.8		114.9		-72.7
					86.3	-2		-27.5		53.3
					-12.9	61.8		24.2		-4.5
					-10.3	50.2		-12.4		-3.8
					-6.5	-4.2		81.3		43.3
					9.2	40.5		-8.2		78.2
					29	2.2		141.5		-7
					12.1	27.6		321.8		35.5
					-20.3	50.7		61.2		5.3
					54.2	75.9		53.6		-53.3
					4.5	36.5		70.4		11.2
					-45.8	72.7		97		44.1
					-40	6.5		-8.1		-2.6
					-21.2	42.9		29.4		41.5
					7.7	52.5		43.4		20.8
					-16.9	6.5		79.3		61.2
					2.1	25.2		-1.6		-12.2
					1.2	39.3		59.8		-0.4
					-6.8	11.5		56.7		31.7
					34.2	4.2		-2		51.5
					-10.6	54.5		-4.2		52.9
					-3.9	-4.8		355.9		34.7
					-2.5	86.9		172.4		0.8
					-4.3	19.1		6.4		9.4
					1.4	87		235.2		8.2
					-0.2	-12		186.5		-54.9
					2.1	22.6		38		-7.9
					93.4	16.2		339.3		46.5
					19.1	32.5		46.5		83.8
					-5.3	21.2		55.7		19
					6.3	108.7		8		2.8
					3.1	82.6		-52		13.5
					25.8	-0.2		97.8		37.5
					0.2	-5.8		-30.7		77.5
					5.3	-7.5		8.8		59.8
					7.5	34.2		11.4		1
					13.5	32.9		118.4		-19.3
					-5.5	59.9		8.8		6.6
					101.2	91.5		2.4		27.8
					-6.8	-1.7		-2		3.7
					5.2	36.2		-9.5		2.2
					9.8	-4.9		7.5		-94.1
					0.7	120.6		-0.2		105.5
					2	23.8		1		97.8
					-3.4	28		0.8		3.5
					9.8	41.3		-19.6		42.6
					-14.8	-10.1		39.3		6.5
					16.5	63		21		24.4
					7.6	0.2		272.8		-0.3
					-6.5	30.8		6.5		-2
					-6.8	42.1		9.2		7.2
					19	10.5		3.9		-36.5
					-0.7	97.6		-8		64.5
					8.4	55.2		3.5		-156.2
					-14.8	3.1		1.1		41.5
					18.8	30.9		0.5		-5.7
					11.2	17.7		22.5		0.2
					6.8	43.1		1.3		211.2
					1	52.5		-0.2		81.4
					8.2	36.3		26.6		33.2
					-1.7	-1.9		-1.7		-3.8
					4.9	20.2		3.4		14.5
					-6.2	18.5		87.8		35.2
					-2.5	-0.8		10.6		179.5
					3.8	-9.6		39.3		3.9
					-4.2	17.8		58.3		-0.8
					-0.8	-2.5		-11.3		45
					22.1	48.4		144.1		65.6
					28	27.4		0.8		15.1
					-27.9	20.8		-5.5		18.3
					2.1	37.3		17.4		47.6
					4.8	9.9		117.9		-1.2
					-15.2	-5.5		30.5		47.8
					4.5	42.2		225.3		6.2
					-11.2	49		10.8		1.6
					7.2	687.7		4.8		-0.8
					2.2	38.8		-2.6		-29.5
					-0.7	74.7		36.5		76.5
					4.3	47.7		21.1		82.8
					10.5	7.4		61.5		47.5
					18.8	-2.5		140.1		38.7
					8.5	26.1		312.8		6.8
					5.9	-5.4		0.7		2.8
					-6.1	-8.7		67.9		46.2
					8.8	5.8		47.3		50.8
					6.4	-5.3		279.3		16.5
					-0.5	3.3		215.9		97.8
					6.5	13.7		2.8		1.9
					8	1.4		130.8		116.6
					-5.7	5.5		128.8		-14.3
					0.9	-5.8		123.2		104.8
					7.1	14.8		76.8		-0.8
					-7.5	17.1		131.6		6.5
					3.9	1.1		469.3		8.2
					-3.6	18.6		9.2		84.8
					-1	-0.2		348		3.2
					-6.2	-2.6		-11.8		4.5
					-2.3	-7.2		-5.2		19.8
					-9	45.7		3.7		197.7
					-6.6	146.8		7.5		-3.7
					-0.9	23.7		212.2		-3
					0.5	5		47.8		69.2
					-11.9	10.2		-0.2		38.9
					-3.8	7.3		2.4		-4.4
					2.5	36.8		-0.4		2.2
					-15.5	-6.7		-4.8		-25.7
					4.8	1.8		85.1		139.5
					-2.3	7.5		81.5		-0.1
					8.5	-0.8		85.2		-0.2
					1.6	-4		107.1		-1.8
					-4.2	1.5		193.7		-12.2
					-2.8	4.5		254.8		17.2
					82.6	30.5		8.8		23.8
					190.5	7.6		109.8		40.7
					-3.5	42.5		-6.4		49
					149.9	7.7		97.3		4.2
					-4.6	2.4		-4.1		-27.9
					5.3	3.8		-2.1		-5.5
					4.9	-1.6		35.8		-22.8
					-6.5	-3.7		-7		-2.1
					-10.1	-6.8		2.7		7
					17.5	9.8		15.5		26.5
					-2.5	-6.1		8		2.3
					1.6	32		-38.8		56.4
					-5.4	6.1		0.5		151.8
					5	-0.3		106.2		90.8
					-5.1	-0.8		80.1		2.5
					-2	4.2		52.7		7.2
					8.8	3.7		167.5		-31.5
					8.8	79.5		-0.6		51.5
					9.8	-4.5		1.6		82.5
					4.1	2.9		111.3		12
					-6.9	23.1		4		3.4
					1	-0.5		-2.3		-2.7
					-6.4	9.6		-8.4		-2.8
					8.8	57.5		117.8		-0.8
					-9.1	5.2		5.2		36.8
					5.4	13.5		134.3		15.9
					-0.3	21.1		241.2		14.2
					-4.5	48		143.5		-17.2
					8.7	73.8		45.3		-4.4
					-3	33.6		-0.5		4.5
					-2.8	11.1		184.8		15.2
					0.8	49.1		45.5		-44.8
					-0.6	29.2		160.7		109.7
					0.3	68.2		56.2		4.1
					0.4	1.1		190.2		55.7
					3.5	57.7		-8.5		-1.8
					6.6	30.5		224.9		9.8
					11.8	28.4		-7.5		6.4
					5.5	17		18.4		-5.7
					-1.3	26.5		0.8		4.2
					-2.6	23.1		100.1		0.8
					-4.5	8.5		216.4		13.8
					6.5	31.7		257.4		4
					2.1	35.5		134.5		5.2
					5.8	30.9		146.8		6.6
					0.3	27.6		273.3		-0.7
					-9	3.2		74.3		-1.5
					-2.5	22.5		9.1		16.4
					-2	-10.2		-1.1		27.6
					-7.8	20.6				3.5
					-0.8	24.3		305.5		-1.4
					256.2	17.8		374.8		-1.3
					3.5	0.4		67.4		-1
					-4.7	32.5		5.7		86.5
					0.2	18.4		152.3		52.5
					4.2	15.4		98		81.5
					0.2	-1.5		79.9		112.8
					-4.2			293.5		25.3
					-7.4			1.3		-4.9
					0.6			162.5		-3.4
					8.3			109.3		4.8
					-4.9			161.4		-1.5
					69.2			5.8		5.3
					-0.1			150.6		36.4
					1.2			284.6		50.9
					-14.3			9.2		36.1
					-3.2			92.3		8.4
					-2.2			290.4		-6.3
					-2.2			176.9		1.1
					-6.3			208.5		-6
					-1.7			247.3		-6.2
					4.2			114.9		8.3
					-2.2			284.2		25.4
					1.4			461		-1.2
					-10.2			132.8		1.6
					-1.4			243.9		-2.2
					1.5			90		21.1
					-1.2			139.1		-1.8
					-2.7			322.9		17.9
					-0.6			77.2		15.9
					-0.2			6.8		-8.3
					8.5			65.8		2.2
					-0.6			102.6		44.7
					1.4			3.9		13.3
					3			61		2.8
					-11.8			64.6		1.9
					0.8			2.6		6.6
					7.7			72.1		-4.4
					-1.9			206		-3.1
					-5.7			7		3
					0.4			-0.5		2.8
					1.2			127.8		13.9
					5.5			221.6		33.6
					1.3			35.3		50.5
					-6.5			99.3		21.5
					-6			58.8		4.1
					2.8			145.4		-1.5
					-3.8			162.6		-6.9
					2.5			117.7		4.2
					4.3			78.6		8.8
					-4.1			65.5		-2.8
					-3.5			166.9		-3.3
					0.5			-1.9		3.4
					14.8			2		7.5
					-6.3			70.8		5.9
					-2.9			165.9		0.5
					-7.8			1.3		1.7
					-1.1			77.9		-10.2
								266.8		1.8
								276.8		-5.8
								191.1		-0.5
								154.5		-0.5
								487.5		23.2
								58.2		6.8
								165.9		2.3
								73.7		-1.6
								1.8		4
								191.5		21.6
								307.5		8.7
								501.2		0
								138.4		131.7
								305.5		3.4
								243		36.6
								120.5		-1.4
								161.5		6
								76		-2.5
								468.7		-86.9
								113.2		65.6
								102.6		60.1
								-44.2		-1.5
								119.5		22.2
								169.8		7.1
								108.8		9.7
								93		-0.1
								241.1		61.5
								293.2		14.5
								284.8		-4.3
								144.7		3.4
								347.1		2.8
								136.2		5.8
								316.8		12
								-261		2.4
								973.3		-0.8
								-5.5		19
								137.8		6.8
								813.7		19.7
								153.1		1.6
								417.8		2
								361.1		7.8
								272		6.9
								1.2		1.7
								97.7		-0.8
								56.5		12.5
								179.5		-0.9
								210.8		4.8
								273.1		2.5
								-0.6		6.5
								97.6		8.6
								312.2		-4.3
								232		6.3
								183.6		-5.5
								372.1		-2.8
								204.2		0.1
								148.2		5.7
								7.6		-5.1
								520.9		-4.8
								216		2.2
								308.8		0.7
								339.4		-3.2
								6.7		5.5
								-11.7		11.8
								291.5		1.3
								264.2		-5.8
								16.5		8
								311.5		-0.6
								348.9		1.1
								285.8		1.5
								42.9		-8.9
								112.2		1.2
								2.5		-0.5
								120.3		-4.3
								161.3		1.2
								249.4		12.5
								144		3.2
								429.5		11.7
								69.5		-9.5
								84.7		5.8
								252.9		1.2
								298.2		7.3
								-1		17.1
								179.6		14.6
								201.5		-2.1
								221.8		5.6
								-0.8		0.8
								113.6		1.7
								156.2		-4.5
								-7.3		40.1
								224.3		-0.5
								137.6		1.1
								112.3		-1.7
								159.5		-0.8
								172.3		3.2
								155.5		3.5
								104.3		12.2
								-2.5		1.2
								184.1		4.5
								13.2		-1.2
								126.8		0.3
								327.2		-0.6
								118.3		33.4
								327.4		16.7
								197.3		9.5
								116.1		7.1
								250.5		64.5
								-5.3		-2
								1.2		34.7
								16.5		94.6
								108.2		4.8
								186.5		7.5
								1		-1.5
								175.4		149.1
								190.3		-2.2
								-7.5		-1.8
								2.8		-2.3
								14.8		-7.2
								40.7		7.1
								129.5		-3
								194.2		0.3
								-0.4		-2.2
								19.1		5.9
								14.6		11
										1.1
								162.8		-0.5
								58.4		4.4
								149.2		5.2
								221.2		9
								49.5		3.2
								142.8		84.6
								27.8		3.9
								2.1		-1.4
								48.1		-0.2
								55.8		17.2
								298.5		8.2
								-16.2		5.5
								141		7.2
								366.9		2.4
								186		-0.6
								29.3		6.2
								239.8		-7
								86.2		23.4
								232.2		1.8
								471.5		4.9
								3.6		3.2
								221.7		0.5
								200.8		3.8
								237.8		9.2
								356.6		38.5
								200.7		-2.8
								239.2		26.3
								352.8		-4.5
								196.9		3.5
								10.8		-0.9
								150.5		5.8
								-0.1		2
								207.8		-0.5
								0.2		-0.5
								71.6		-0.2
								274.4		11.2
								-1.8		-2.5
								258.1		2.2
								-3.3		2.4
								38		3.4
								61.5		13.5
								149.4		-4.5
								244.8		34.8
								0.8		0.1
								183.6		0.2
										6.8
										39.8
										10.6
										7.2
										20.9
										-0.7
										7.2
										-4.5
										-1.3
										25.8
										6.1
										-0.5
										25
										4.2
										12.5
										0.5
										-0.8
										6.8
										3.1
										33.5
										-7.8
										-0.2
										-3.2
										1.6
										2.2
										-6
										1.6
										1.5
										4.5
										3.9
										5.9
										3.2
										1.4
										7.2
										2.6
										0.9
										11.5
										1.5
										1.4
										0.6
										-1.2
										7.6
										-1.8
										10.5
										6.1
										-5.8
										107.1
										-2.3
										-5.5
										1.3
										9
										7.2
										-1.3
										-0.7
										1.2
										3.3
										-3.2
										22.8
										-2.2
										-1.2
										-1.8
										-1.2
										-4.6
										7.8
										12.8
										-4.3
										5.3
										2.2
										0.6
										17.8
										7.6
										0.5
										1.8
										18.7
										22.8
										-0.6
										16.6
										-3.5
										-3.3
										-5.6
										-0.5
										0.6
										3.2
										2.6
										3.2
										2.4
										-0.3
										-0.2
										1.8
										15.8
										1.2
										1.1
										-0.8
										0.9
										11.5
										0.8
										-2.8
										10.5
										2.3
										2.7
										-1.1
										2.2
										-9.2
										0.7
										2.2
										11.5
										5.5
										6.5
										-1.1
										3.9
										6.6
										0.8
										1.9
										4.5
										4.1
										-1.7
										0.5
										-1.3
										2.4
										5.3
										-5.9
										5.9
										2.1
										-1
										5.2
										4.6
										36
										-1
										6.2
										9.5
										-2.3
										-3
										3.3
										2.2
										-1.4
										-3.2
										12.5
										15.8
										0.6
										-4.2
										-3.2
										15.7
										-4.8
										5.8
										18
										2.6
										-0.3
										11.4
										23.9
										3.1
										0.5
										36.7
										2.2
										1.5
										3.8
										27.2
										2.2
										-1.8
										-1.2
										5
										11.2
										13.4
										-2.5
										0.4
										0.7
										2.2
										5.8
										-1
										4.5
										-1.5
										16.8
										-2.2
										4
										1.5
										7.8
										9.7
										6.2
										19.9
										-1.1
										14.5
										-1.2
										0.3
										1.5
										1.5
										0.5
										3.6
										-2.8
										2
										-2.1
										0.7
										1.2
										21.9
										-0.4
										1
										0.5
										0
										4.1
										3.8
										66.3
										-31.6
										1160.2
										2.1
										6.8
										463.6
										9.2
										-11.4
										-21.3
										33.4
										583.4
										429.1
										572.6
										35.7
										-123.9
										-50.9
										157.8
										7.1
										3
										57.2
										3.6
										-1.5
										1197.1
										534.5
										704.6
										29.5
										304.5
										-121.9
										115.2
										80.2
										359.5
										-128.5
										52.3
										-387.3
										438.8
										-16.1
										53.5
										420.8
										249.2
										25.5
										198.8
										-28
										42.6
										-10.7
										696.1
										46.1
										593.4
										204.2
										-12.7
										15.7
										234
										-5.2
										1079.3
										451.9
										1088.3
										545
										-4.1
										7.6
										101.1
										-24.2
										405.3
										-11.4
										1.4
										5.2
										13.6
										587.4
										-2.8
										310.6

## Sheet: Syk-Repeat 3
Intensity at 72-ligand origami (co-plated with 36-ligand origami	Intensity at 36-ligand origami	Intensity at 72-ligand origami (co-plated with 16-ligand origami	Intensity at 16-ligand origami	Intensity at 72-ligand origami (co-plated with 8-ligand origami	Intensity at 8-ligand origami	Intensity at 72-ligand origami (co-plated with 4-ligand origami	Intensity at 4-ligand origami	Intensity at 72-ligand origami (co-plated with 2-ligand origami	Intensity at 2-ligand origami	Intensity at 72-ligand origami (co-plated with 0-ligand origami	Intensity at 0-ligand origami
6	0.5	147	2.8	152.4	-1.8	61.8	-6.4	120.3	26.4	142.3	-4.5
1	34.2	10.5	-2.4	62.2	5.7	85.5	5	3.9	1.3	184.8	3.5
6.8	78.1	96.5	4.2	29.2	-1.8	-4.4	0.5	-1.5	190.3	78.8	5
24.7	-14	-10.5	11.8	-1.7	3.1	0.8	-5.5	-7.4	1.2	72.5	-2.2
57	8.2	3.5	2	110.2	-4.3	26.2	11.7	6.5	5.7	-2.4	-3.2
9.9	13.1	67.5	29.4	-2.5	-6.5	44.2	-2.1	7.8	-7.5	135.3	6.5
274.5	-1.2	-1.6	3.8	61	-6.6	7.5	1.4	2.7	11	39.4	62.5
334.5	398.6	-2.9	-4.3	40.7	5.7	26.4	-4.9	7.8	-0.7	22.4	-13.8
148.6	10.6	76.7	52.7	3.1	-3.2	-1.7	0.6	2.5	-12.7	34.2	75.4
-0.9	0.3	-0.2	2.2	33.5	5.9	5.9	-2.2	139.2	0.7	-7.2	31.2
5.2	220.8	-0.9	-2.8	14.1	-3.2	238.9	1.9	4.2	83.8	60.5	26.4
180.6	13.9	10	43.4	-8.2		37.4	3.8	130.6	93.1	152.9	14.8
12.6	-9.1	84.6	9	4.3	-4	39	-2.6	-6.2	1.5	39.2	18.1
0.1	7	115.8	-14.2	15.9	0.9	10	0.3	94.9	4.5	157.5	49
8.3	9.1	104.5	24.1	122.8	2.8	2.2	-8.5	107.3	18	102.4	11.2
13.5	-2.5	36.3	1.6	-7.2	-4.8	69	2.5	180.5	197.9	58.1	5.3
215.8	73.6	32.6	-0.5	-2.2	0.4	-2.8	0.2	8.5	30.9	77.4	100.6
122.6	-10	49.4	-4.8	87.1	5.4	61.1	9.1	-3.2	-2.2	51.2	4.2
-7.8	-2.3	13.4	-1.2	4.8	3.7	41.2	-3.7	274.5	0.7	-5.8	-0.2
-5.1	-26	100.7	14	125.7	-1.8	16.5	5.5	7.8	63.5	1.3	29.8
12	201.4	-3.6	-2.8	-1.8	-0.7	57.8	4.4	96.8	-0.8	14.3	7.3
-4.8	102.2	-7.7	21.7		-2.4	38.7	-5.5	100.2	-1.8	47.4	176.5
8.6	1.2	58.8	41.9	-6.8	3.8	17.8	0.3	124.8	3	53.7	10.7
10.2	-5.8	-11.7	26.8	11.5	1.6	21.2	3.5	91.7	8.5	43.1	3.9
-0.1	18.9	84.6	63.2	2.2	50.8	79.6	7.1	-2.3	-12.1	83.3	0.5
-5.5	8.3	96.6	6.1	19.7	1.9	-3.7	47.2	23.5	2.7	237.2	11.7
-24.3	206.5	12.8	30.7	0.1	-1.8	134.8	4.3	148	9.1	227.9	-2.6
293.9	-3	50.9	-1.2	30.2	2.4	52.2	26.3	232.3	0.6	-4	28.5
-6.5	0.1	-5.5	-12.7	55.8	5.3	-2	-40.3	180.2	6.8	107.5	85.7
21.8	0.1	-6.8	12.8	4.3	2.8	47	33.7	59.6	-10.6	192.5	98.7
-3.6	103.8	47.5	10.3	-1.8	42.7	113.5	5.7	59.2	-33.5	22.8	5.1
9.8	252.3	98.3	-0.8	27.4	-1.7	7.9	2.6	118.2	-2.2	96.8	182.7
59.6	7.7	101.3	-3.5	39.5	7.8	-0.5	2.2	33.1	44.5	166.8	21.8
0.3	23.6	86.6	176.3	26.5	-6.3	44	-2.8	31.4	197.5	68.5	2.9
93.8	5.3	87.5	2.6	32.7	-5.8	272.2	26.9	11.4	85.6	76.2	-3.9
-6.2	-9.2	-5.9	31.8	41.9	-1.7	110.3	32.7	28.3	-1.8	-1.6	1.8
-1.9	5.3	60.2	11.5	65.5	4.1	4.6	-2.3	-5.6	-11.3	1.2	8.2
68.8	10.2	-0.7	16.5	17.3	-0.8	-1.8	-23.1	-5.7	2.5	40.5	2.1
-4.2	4.5	71.4	1.9	3.4	1.8	88.8	0.9	50.6	7	30.9	17.6
3.2	4.3	51	5.9	40.7	33.8	88.5	22.2	3.9	124.1	44.2	25.8
-12.4	0.5	106.2	7.6	1.6	-5.4	46.7	6.6	-8.3	19.4	-9.4	6.3
173.2	69.5	41.2	-2.4	85.6	55.8	123.5	-5.3	9	0.8	-3.8	13
6.5	4.8	108.8	1.5	94.1	10.2	7.2	4.8	9	0.2	153.6	1.5
-0.8	14.5	169	8.3	12	-21.6	-9.5	29.5	124	-12	4.2	9.2
-3.8	0.5	214.9	4.5	56.8	-2.3	63.1	1.9	3.5	1.5	123.1	-1.3
14	6.4	-7.7	72.5	57	-9.5	48.6	2.6	142.8	81.2	-6.5	-2.2
11.2	-1.5	75.4	6.4	21.3	-8.8	-1.5	-18.2	11.1	2.8	38.8	4.2
11.3	90.6	80.7	23.5	20.5	-1.5	-5.5	-2.4	8.1	-9.8	91.8	-2.2
-0.9	-5.2	67.1	-8.2	2.8	162.5	34.4	-5.1	27.2	2.5	121.3	5.9
-0.6	277	88.5	4.5	40.5	22.5	-18.6	1.5	-3.3	7.2	1	1.8
13.3	2.9	104.3	38.5	77.2	5.2	44.5	-1.4	45.7	0.8	97.8	1.5
1.2	0.5	167.4	2.2	-2.7	-14.2	88.1	11.9	-16.9	8.2	-0.8	42
-3.2	-8.2	13.4	47.1	59.1	99.3	44.4	0.2	-9.3	4.2	-4.4	4.7
1044.3	-14.3	44.5	53.2	80.5		43.8	-8.2	38.5	-1.3	213.8	5.8
0.1	12.6	97.1	36.7	-3.8	-9.2	238.4	-11.8	275.5	-6.2	-1.7	19
-8.3	10.4	21.8	54.6	54.1	3.1	241	7.6	84.1	6.5	154.6	-14.2
3.8	7.9	311		97.4	148.8	145.3	5.7	206.4	0.4	4.2	13.5
329.8	8.8	82	3.2	3.7	35.7	12.2	-3.3	77.8	130.5	43.1	-2
-3.6	24.3	147	2.1	8.1	65.6	120.1	-20.7	28.7	-7.3	38.3	66.3
88.8	327.5	2.3	-3.5	17.7	228.9	96.8	50	-9.5	5.7	52	3
-8.9	-0.1	123.1	10.3		31.1	21.8	0.6	135.1	12.4	30.9	-2.8
12.7	22.1	80.5	-2.3	702.8	-1.3	236.7	21.8	83.4	2.2	-2.4	4
3.9	7.5	176.9	-3.2	6.4	1.2	7.8	0.8	114.9	4.7	14.6	0.8
-2.8	6.5	299.3	5.7	82.2	307.2	-0.5	219.1	55.6	0.8	60.8	-0.9
5.6	-6.2	113.9	6.1	1579.4	-30.3	60.9	-5.7	78.6	7.1	27	11.5
19.5	129.5	223.5	4.2	419.1	683.4	75.8	-1.2	108.8	-7.1	96.1	4.2
-4.3	65.8	75.4	1.8	200.5	2.5	3.8	-13.8	-7.9	31.5	29.2	7.8
-9.9	17.2	0.4	-8.2	-5.9	125.9	219.2	9.3	76.7	90.5	13.1	-4
8.5	8.5	90.8	-0.8	602.2	26.1	3.9	-16.2	84.3	24.2	27.2	-3.5
11.5	-8.5	105.8	1.8	2753.2	58.2	82.8	-10	282.8	5.5	10.2	-0.6
5.8	21.6	14.7	-3.9	412.8	745.5	608.4	1.2	127	3.5	65.7	-1.5
172.8	-0.3	1.7	-10.2	5.4	-138.7	50.8	-6.2	-1.2	-2.5	0.1	24.1
489.2	207.4	9.5	32.8	330.5	202.8	83.7	4.2	16.8	119.8	0.4	-1.7
-0.5	9.8	2.5	-4.5	1114.3	-14.3	343.5	-30.7	110.2	-4	30.5	-2.7
280.2	134.6	131.9	6	454.9	-24.2	116.9	-1.6	-3.2	45.5	18.8	9.7
5.8	-10.6	56.5	10	0.6	-242	120	-1.6	6.5	4.5	-0.2	-2
-4.9	13.3	141.2	2.6	442.7	-90.1	5.8	0	18.8	1.5	47.5	0
17.4	-2.4	5.9	30.4	692.8	369.2	67.8	-24.4	71.3	-2.8	-5.8	2.1
2.8	204.2	176.9	9.8	1644.9	10.5	55	3.2	155.8	1.2	28.6	2.4
352.7	-2.4	73.4	1.5	540.5	-19.8	4.8	41.4	132	25.2	18	5.3
259.5	4.4	15.3	4.2	40.7	-6.2	31.5	-5.5	-5.5	30.5	4.5	-1.8
12.3	3.2	213.2	-1.7	-23.4	13.5	2.7	2.8	-0.2	-2.3	38	0.3
389.8	3	0.7	6.2	547	0	-9.8	9.5	3.6	7	-0.6
-5.4	1.2	83.2	3.5	1088.2	-8.4	7.2	-5.1	1.1	2.8	1.5	-5
479.2	-6.9	100.3	3.2	442.5	-2.7	116.8	8.8	-1.8	16.2	23.9	-0.5
8.8	-11.6	93.6	1.3	-24.3	-1.2	11.7	-2.5	-8.5	200.3	48.2	7
-7	-4.5	6.5	-5.4	1357.5	-0.2	1.2	5.8	8.9	-6.5	36.7	9.5
-1.4	45.1	154.8	2.8	228.8	5.5	110.1	13.3	-6.2	-0.2		-5
4.5	2.7	7.2	1.4	2656.6	2.2	52.7	6.6	59.1	-3.4	42.4	18.4
200.4	207.5	55.3	1.3	704.1	6	-4.2	-1.7	-3.5	1.8	2.3	32.2
-10.2	15.8	8.2	5.2	0.9	-2.8	26.4	3.1	158.1	4.5	23.3	1.5
-1	-13.8	91	-3.5	414.5	14.8	240.7	7.1	97.3	14.2	-2.7	9.8
184	3.8	8.5	0.3	1242.5	4.3	-25.5	11.5	49.8	121.9	-4	-1
198.3	9.4	129.4	-4.7	-3	-3.8	50.8	-1.1	-4	88.8	76.4	0.8
342.2	-1.2		2.6	732.4	87	26.2		65.5	9.2	38.1	7.2
10.1	-3.4	66.2	6.1		678.2	0.3	9.9	5.1	22.2	15.5	-6.9
175	-6.2	3.2	-0.6	84.5	224.2	0.8	4.5	77.8	0.8	3.6	-4.9
36.3	-15.4	45.8	-0.4	0	-16.3		-8.3	-5.9	1.5	-1.8	3.2
238.5	-2.5	41	19.9	-3.1	13.7	50.5	-0.1	1.8	0.8	0.8	1.3
10.5	-1.1	10.5	2.6	50.1	-1.5	44.6	8.8	11.3	57.5	5.8	12.9
142.1	389.5	-0.6	4.8	91	7.5	0.6	3.7	55.4	3.4	3.2	-5.5
26.3	-24.2	1.8	6.5	32.7	-0.4	49.6	13.1	36.2	6.4	79.9	-6.1
22.1	8.9	-0.2	5.2	377.8	-7.8	37.6	40.2	-1.9	-10.4	2.2	1.1
-3.5	1.6	3.8	2.5	163.5	219.3	47.1	1.6	-1.6	108.8	0.6	4.4
8.4	-1.2	56.4	-2.6	368.3	-52.8	41.2	-0.6	9.8	1	455.5	7
5.2	264.4	4.8	1.7	672.2	-5.3	41.3	-10.1	1	-0.3	-8.5	7.8
-7.8	305.4	43.7	9.6	702.2	19.3	3.8	7.5	1.8	-2.8	11.3	-3.4
7.8	229.4	-9.5	8.2	106.1	-12.2	75.8	0.5	-7.2	1.2	11.9	-8.5
338.8	10.2	59	-2.9	276.8	-15.1	60.4	-4.2	0.5	132.6	3.2	2.8
331.1	5.1	2.8	4	436.2	6.7	-1.6	20.8	4.3	-7.8	5.8	-1.5
46.5	-6.2	51	6.2	56.4	-1.5	32.7	4.8	17.8	17.5	8.9	5.5
5	4.7	-4.3	-0.3	270.7	6	85.5	-1	15.2	29.3	39.5	1.8
1.8	196.9	-3.9	5.2	147.2	-14.2	13	3.8	0.5	31.6	12.2	-7.8
628.2	117.4	-7.4	-0.9	-15.5	-4.5	12	-6.8	10.9	-3.4	62.4	6.8
131.8	315	-1.4	18.8	146.1		69.2	-0.3	121.2	3.2	-0.5	0.4
-23.4	-7.6	28.5	6.8	399.8	5.4	53.6	4.3	70.7	-0.7	0.8	7.6
4.5	-4.4	-2.7	-3.6	127.3	141.7	111.1	3	3.8	27.8	5.7	1.8
-7.8	3	0	6.5	166.9	203.2	83.7	8.8	-3.5	-4.4	1.4	-8
23.8	6.2	12.8	11.8	0	5.2	1.8	12.9	7.9	8	24.3	2.6
330.5	297.8	1.7	2.9	121.1	31.4	12.9	-0.5	3.8	-7.9	0	3.3
616.2	-6.5	-2	0.8	-5.5	0.8	51.3	8.8	61.1	11.5	-2.8	52.5
503.9	54.9	51.3	-1.5	46.4	125.5	92	7.2	15.2	4.8	63.3	-1.9
341.8	383.8	2.6	3.4	4	-1.8	21.4	-5.7	57.8	-2.4	10.8	-13
9.8	31.5	43.3	6.3	121.5	-12.1	12.1	-51.5	46.2	15.2	-1.8	10.5
12.4	180.2	47.7	6.2	669.1	-4.8	116.6	-4.8	114.7	11.5	4.3	-5.9
13.5	-10.4	3	-1.2	93.1	67.5	6.3	24.6	4.6	1.6	3.8	-1.2
549	-5.2	12.1	5.3	71.5	6.2	89.5	39.4	-2.8	27.1	1.7	-8.8
452.8	-5	-8.7	2.5	56.2	-39.7	-6.2	-5.6	-7.8	-0.2	-0.1	-3.5
-0.1	3.1	-2.5	2	82.1	54.4	3.8	-11.9	55.8	0.5	130.2	2.5
246.5	156.7	33.7	25.6	130.5	82.5	349.6	-23.6	-1.2	0.4	6.5	-7.2
137.4	26.2	49.5	5.1	47.8	62.2	36.3	1.5	3.2	7.8	-5.5	2.2
162.9	2.5	1	-4.5	4.2	4.5	166.2	-6.1	-3.8	-5.1	2.4	8
291	9.2	10.1	1.5	-2.1	5.2	44.1	137.6	-4.2	7.2	-2.2	-6.8
688.2	1.4	14.5	3.2	135.1	26.2	0.4	39.7	-2.5	-3	6.7	2.4
-4.6	15.6	32	9.6	143.5	-2.7	320.4	-11.6	-2.6	-0.9	7.3	5.4
869.7	79.4	19.9	-0.2		9.7	61.2	44.1	1.8	16.6	-1.6	-7.6
281	58.2	60.9	7.2	135.8		43.4	24.2	3.7	1.8	15.6	-7.7
19.8	221.2	1.2	3.9	4.9	-3.5	57	-64.8	5.8	-7.7	-3.9	-1.8
-1.4	-0.2	23.6	1	79.4	-1.2	78.5	-36.5	7	62.2	-6.5	1.7
-4.2	5	102.1	-10.8	82.4	11.4	211	-2	110.1	2.7	0.5	-1.2
2.9	10.3	15.7		89.8	47.8	333.1	-32.3	16.3	2.9	36.3	-5.3
4.2	4.9	3	0.2	99.6	11.8	1.6	17.9	-7.4	23.2	18.2	3.9
16.3	10.8	36.8	118	-11.9	32.2	127.8	6.9	22.2	-0.3	39	9.5
14.4	215.2	-1.5	138.6	22.8	-3.3	561.7	30.2	-1	24.8	-9.5	-0.2
495.9	138.1	0	72.8	352.3	38.5	-12.6	14.1	38.9	25	3.2	2.9
795.5	168.2	66.2	7.2	476.5	454.9	382.2	-46	11.7	8.9	21	-1.6
658.5	90.3	-3.8	25.6	-1.3	3.2	1.1	8.1	-8.1	7.5	26.2	-4.1
3.4	91.8	7.9	41.5	146.8	-0.5	164.2	-3.4	39.8	5.8	19.5	8.9
25.6	9.3	28.4	151.5	6.8	10.3	223.8	0.1	6.4	6	15	47.4
-1.9	2.6	-0.5	-8.1	3	-3.9	60.5	24.1	1.4	18.5	1.2	9
15.2	-8.1	9.6	15.3	22.2	43.4	254.8	30.8	-1.5	-1.5	7.5	-1.1
18.8	174.6	40.3	15.7	417	70.2	412.5	17.8	-7.3	0	-8.3	4.5
7.5	161.4	32.4	64.6	-1	5.3	-3.1	-2.1	3.5	-5.7	0.8	6.8
353	213.5	-3.5	-8.9	-0.7	-11.5	111.8	10.2	30.6	1.9	8.2	6.5
251.4	-0.2	34.5	29.6	-4	37.1	-9.9	144.2	3.5	0.2	-2.3	-0.5
370.3	-7.3	45.8	60.5	1.9	-10.4	-24.6	19.5	-8.4	19.9	279	0.8
232.7	-2.1	21.2	-34.2	367.1	23.5	84.8	-0.3	64.5	5.3	4.2	-12.4
-15.6	1.2	0.7	40.7	5.8	-19.5	116.2	228.6	-1.3	58.2	-3.8	3.9
14.8	17.9	2.8	19.5	117.9	57.5	69.6	28.8	0.5	8.1	20.7	-1.8
8.7	18.2	-4.5	-1.1	-19.5	-82.1	134.3	-5.8	57.5	3.2	72.5	3.3
-2.3	181.5	2.4	26.1	0.2	-2.8	23.2	-3.2	-1.3	1.5	-10	-5.9
322.3	466.3	92.8	6.4	127.7	126.2	60.2	-37.2	59.7	5.8	-2.5	-0.2
641.5	65.2	92.6	2.3		-14.5	291.8	21.2	215.4	10.2	273.2	1.8
0.5	8.7	49.2	38.3	-1.8	1.7	484.8	68.7	0.9	4.2	8.1	6.9
-4.5	-14.5	55.8	0.4	6.6	318.3	-9.2	-12.6	-6.3	9.8	3.8	4.9
7.8	24.3	-4.3	33.3	155.8	305.3	41.8	-0.3	31.9	81.2	137.5	1.7
52.6	97.5	1	4.1	7.2	13.8	26.7	-51.9	59.5	-0.2	24.4	-1.9
467.6	-8.7	16.2	-7.1	264.2	-0.6	67.2	-2.5	38.5	15.2	-8.3	4.9
497.7	11.7		-2.6	214.1	-1.2	431.9	130.8	-3	-8.3	-4.6	2.5
464.6	8.5	258.8	11.5	146.8	78.2	24.3	66	3.4	7.3	2.9	49.5
256.1	7.2	129.4	1.8	32.6	124.9	64.8	5.7	2.1	0.5	45.3	-4.4
103.4	-8.2	165.8	33.3	74.3	-4.8	211.2	9.3	-12.8	3.2	-1.7	6.2
741.2	368.5	98.2	2.2	56.8	-5	139.7	2.2	62.8	6.2	-4.1	14.1
304.5	322.5	52.2	35.1	166.9	7.5	29.2	-37.8	-3.8	19.5	-6.2	-7.8
-1.4	243.8	2.9	72	68.8	-3.2	389.6	17.3	114.9	15.2	0.8	1.8
18.4	-7.5	178.7	61.6	108.2	-1.5	-2	2	2.8	46.8	-4.4	-0.1
16.5	-4.6	173.5	17.5	-5.7	441.9	255.8	-0.5	69.7	4.8	-11.2	0.5
398.2	0.9	23.1		108.3	1.7	13.8	9.9	78.8	-2.2	-5.1	-6.2
137.9	11.9	47.1	143.8	80.6	13.6	4.1	-33.5	164.5	-2.9	10.7	-2.7
68.7	1.1	83.2	4.1	110.8	-9.3	9	57.3	-5.6	34.2	-14	85
44.1	35.1	102.2	2.5	158	-1.5	-14.7	-56.8	5.2	3.3	-4.9	-0.5
266.1	8.5	-6.7	2.5	45.8		-6.9	2.2	64.3	13.2	2.6	4.9
9	-5.3	303.8	-2.5	10.2	-4.6	-7.7	51.8	0.5	1.3	2.6	11.8
2.9	13.5	162.4	114.5	301.7	2.5	-13.5	31.8	36.8	7.1	-11.5	-0.4
7.9	5.5	165.6	1.3	55.9	-0.4	12.5	181.2	150.5	-6.6	21.1	-6.3
-9.5	263	166	-5.8	125.3	-8.6	324.8	-7.1	6.5	53.2	-6.2	-14.4
36.5	-10.5	396.7	1.7	99.6	29.5	22.4	1.1	49.4	0.1	-3.4	-3.9
264.1	-6.3	177.7	-3.8	482.7	4.4	541.2	-63.9	-6.3	2	14.8	11.6
284.6	-10.5	65.1	-2.5	99.3	20.8	175.2	119.2	5	0.1	7.7	-8
25.2	4.2	148.2	8.7	-3.5	-3.8	415.5	-38	60.7	37.6	-5.1	-40.2
59	9.6	190.5	5	115.5	2.5	145.2	257.2	36.6	30.9	-1.2	1
130.8	2.5	165.2	0.4	97.4	182.1	148.3	-12.7	3.7	-0.7	53.5	9.2
-2.8	200.8	387.6	7.7	151.9	21.7	469.5	8.4	5.9	-5.3	1.3	-4.1
6.5	206	-0.3	6.8	114.3	24.7	404.1	-1.6	101.5	7.5	27.9	4.2
8.2	221.2	42.4	69.8	117.4	-1.1	654.7	-19.6	3.5	-3.5	-0.3	1.1
1.6	-9.3	68.5	12.3	69.7	92	625.8	50.9	134.2	36.1	-6.2	11.7
3.1	1.1	290.2	40.1	134.8	6.2	492.5	-60.5	4.3	-0.2	81.8	-2.4
0.4	6.5	100.5	209.3	4.2	3.2	-2.3	229.2	9.2	1.2	-4.9	18.4
262.3	4.5	170.6	115.8	137.2	29.2	862.7	-26.6	27.2	-4.3	-4.5	1.3
107.3	1.1	-1.8	-8.8	137.6	9.6	-8.1	4.5	11.4	54.5	-11.2	-0.6
8.5	174.5	116.2	-0.1	86.1	117.4	562	-4.7	168.4	0	-1.7	75.8
0.5	260.6	279.9	85	-9.4	23.5	194.5	0.2	94.3	-5	1.2	-3.8
7	94.5	282.6	149.2	76.8	16.5	-34.2	-2.7		-2.2	3.6	3.7
10.7	56	139.5	100.8	224.5	9.1	164.1	-5.9	-4	8.7	-2.4	1.4
25.3	73.3	62.1	212.5	224	1.3	75.4	0.1	10.8	7	7	4.2
0.7	-8.8	237	96.4	-3.4	107.2	331.9	-1.3	3.5	-8.8	5.2	-10.4
7.7	-1.2	207.2	17.8	243.6	20.4	342.7	-2.7	15.8	6	3.4	8.7
-16.5	0.8	426.5	18.3	230.2	86.2	351.5	16.2	7.3	0.9	6.4	24.6
241.4	9.3	224.4	8.5	132.2	-12.1	2.8	-6.8	-1.5	-3.6	2.9	14.1
323.8	-3	-4.9	2.9	82	26	225.5	-2.3	42.2	0.8	-1.2	2.2
422.8	166.2	4.8	133.1	15	30.1	518.6	-4.9	7.2	-1.7	8.5	8.6
149.5	214.1	17	-18.3	145.5	28.8	375.9	-2	2	6	29.8	-12.1
145.2	5.7	33.5	-2.7	112.5	54.5	618.5	5.2	-2.2	16.4	-0.6	90.9
201.3	6.6	123.5	-2.4	98.5	18.5	250.1	11.8	-6.3	275.1	48.9	0.4
7.3	2.8	128.1	48.1	274.8	2.2	-6.3	-5.3	-2.5	4.2	15	4.5
10	4.8	60.8	101.5	-8.8	11.6	-1.8	2.3	-1.8	12.6	4.8	0.2
-2.2	7.8	73.8	139.2	-1.1	-3	51.5	-1.2	-2.6	7.6	56.4	8.2
12.8	4.1	53.8	15.2	3.1	41.2	116.5	3.6	30.4	2.9	6.9	2.6
-4.3	9.2	-3.1	87.8	189.5	15.9	-9.2	6.4	-3.3	13.6	26	-9
-2.2	-10.8	141	5.3	-5.3	20.5	-7	59.8	34.2	46.6	45.4	0.6
235.8	-1.9	99.1	-16.8	2.6	15.7	183.4	-3.1	4.9	61.4	-2	-4.5
417.2	-1.8	190.5	2.1	108.8	49.6	22.1	2.8	-4.2	30.2	6.8	15
8.9	3.2	1.7	-3.2	138	2.9	-10	5.8	34.5	15.3	67.7	-9.5
11.8	3.2	13.9	2.5	3.4	51.3	-10.7	0	14.7	-4.2	-1.2	2.5
6.6	4.1	74.1	100.7	-2.4	57.6	-7.9	22.8	18.3	-0.4	13.1	17.5
14.9	0.1	41.7	14.5	59.3	-15	9.3	15.5	19.7	64.6	-1.3	-2.2
-0.2	96.4	59.5	2.5	159	21.4	-3.4	-17.2	2.3	15.1	3.5	-5.2
231.6	222.2	63.2	37.5		57	61.2	12.6	23.3	-7.5	4.2	19.7
591.5	227.2	-1	3.5	285.9	-11.5	23	1.9	60.2	82.3	77.6	5.4
13.5	-8	-3.8	-5	1.1	51.5	11.6	25.9	-4.2	-4.4	37	-15
0.2	12.6	35.3	-4.5	547.5	84.3	-8.2	-13.7	52.5	-1.2	12.3	-2.3
24.8	7.6	-5.2	362.8	107.3	161.2	221.8	26.2	-2.9	4.7	-11.2	-17.2
-2.2	-4.4	-5.5	3.5	10.3	165.3	-4.4	-7.3	10.4	1	-9.8	12.6
132.8	0.5	-2.8	-1	-3.8	16.5	-15.1	-20.1	-3.3	-3.1	-5.7	0.8
29.2	2.8	5.8	-14.1	-0.9	234.2	233.5	17.4	4.4	37.6	7.1	-2.4
6.8	7.2	-1.7	-9.4	484.3	-0.5	348.8	-17.6	-4.3	12.5	-6.8	37
1.5	176.5	-0.1	-6.4	-16.6	79.6	503.2	-18	27.5	29.2	-1.8	-9.9
306.8	142.2	6.5	7.2	1.3	-8.2	224.8	-21.9	2.2	8.6	4.8	2.1
199.1	169.8		39.4	246.5	2.9	268.6	-71.4	22.8	2.2	23.3	28.6
11.2	273.2	182.5	-1	-25.8	-2.9	237.3	2.8	1.8	41.4	242.5	-11.8
23	-0.4	83.6	15.5	0.7	1.3	250.5	103.3	-3.1	3.9	140.1	6.8
10.7	17.8	39.3	5.1	786.3	-16.6	224.2	3.1	6.3	-5.1	3.2	-6.2
13.3	5.5	3.1	0.5	283.2	-3.7	13.7	4.6	-1.8	8.9	88.7	0.8
38.7	30.2	23.6	0	162.5	-4.1	-4.1	50.4	-5.5	-1.7	30.6	-2.8
33.3	128.7	214.1	-3.4	361.2	-6.9	397.2	-43.8	3.8	9.7	-4	7.8
9.4	21.4	3.5		3.3	2.7	67.9	21.3	-2.6	-4.4	-6.1	37
21.5	103.5	-2.9	-4.1	10.5	-10.2		72.4	8	41.5	89.8	22.5
-7.7	105.7	121.8	90.5	21.2	6.5	-1.9	11.8	-0.2	-4.4	47.4	-3
1.8	-6.1	34.6	131.1	11.2	13.5	40.2	-12.5	7.1	-1.2	42.1	11.5
-0.6	0.9	227.7	7.6	9.2	-6.8	-14.7	5.9	3.6	63.2	31.6	1.2
-2.8	-2	1.8	18.6	-0.7	1.5	1.4	-4	1	61.1	4.2	20.4
31.5	10.8	152.2	59.2	-3.1	-1.9	265.2	60.8	-3.5	-0.9	-6.2	-12.8
4.7	3.7	120.4	41.1	215.8	3.8	93.5	2.6	1.8	9.4	117.6	-1.2
6.2	3.4	185.5	1.5	0.2	103.7	-3.9	330.7	-2.8	5.6	49.9	-4
176.8	-0.2	58	-2.7	10.5	-4.7	85.1	21.8	3.1	8.5	20.6	20.8
-24	279	4	-9.6	117.8	0	-11.2	1.8	6.8	30.7	-5	-4.8
140.5	108.8	133.8	5.6	120.6	147.5	22.2	15.3	3.6	72.9	65.6	-4.3
126.2	142.1	29.1	11.2		2.8	11.5	-0.1	-1.8	-6.2	1.5	19.4
45.8	178.8	17.5	-3.4	-10.2	6.4	40.7		-5.8	-4.3	-8.1	-5.9
-0.7	6.6	157.2	207.7	107.5	11.5	-5.6	0.5	1.3	-8	-4	7.6
-4.8	-5.9	39.3	8.9	45.3	-10.9	80.6	0.2	-2.2	-9.3	-2.8	3.5
0.2	19.1	276	15.5	131.4	-9.3	16.8	-5.8	-1.2	-1.1	0.6	2.9
8.1	-1.4	135	60.4	1.7	71.9	-5.4	5.4	-0.6	0.7	36.8	0.3
3.1	11.2	205.2	238.6	1	-0.3	-17.9	21.1	-9.2	-13.3	7.8	-7.7
77.7	74.3	215.5	17.7	10.8	-1.8	1.5	5.5	2.8	5.3	2.5	2.3
260.6	304.5	186.1	78.4	38.1		161.5	0.2	101.5	12.7	19.5	3.8
287.6	106.6	237.4	-7.2	137.2	30.3	139	10.2	5.5	0.8	52.8	-1.9
-9.5	136.7	166	5.4	-5.2	21	-11.3	-4.3	53	4.5	4.3	-10
8.1	-4.4	50.8	101.6	84.5	61.5	22.1	-6.4	0.8	6.7	5	21.1
26.3	175	273.8	65.6	136.2	-7.2	-1	-6.7	0.2	-0.8	75.2	-1.2
14.2	16.8	144.5	8.6	-4.8	378.9	48.8	7.9	1.5	-0.8	59.5	6
-0.1	18.8	156.5	57.5	-1.2	28.3	82.5	-1.1	9.4	2.3	-13.5	4.2
43.8	2.8	95.9	249.3	74.2	-5.2	-3.2	2	1.5	1.1	21.1	-3.6
16.2	5.8	214.5	85.2	0.2	10.3	0.9	5.8	-5.8	-7.7	16.2	59.6
2.9	-3.5	-6.2	-7.4	64.8	18.9	121	-2.9	-4.4	2.8	-3.7	1.1
170.8	6.8	264.3	-15.5	46.6	2.8	-1.2	0.8	-3.2	62.8	-0.5	-16.6
15.5	6.8	108.8	5.6	125.9	6.9	12	-1.9	-1.2	-1.9	35.5	14
7.7	15.4	235.3	297.2	107	5.3	260.3	6.1	11.5	4.2	2.5	-12.5
17.8	6.7	174.8	174.3		149.9	30.2	2.6	35.2	53.8	13.2	32.2
-1.9	-4.9	269.9	4.5	0.8	11.2	277.1	-0.5	-2.1	14.1	-0.6	-0.5
0.2	8.8	246.6	89.2	278.5	11.2	-8.5	5.7	29.2	-4.1	1.1	2.5
178.8	327.2	115.5	50.9	314.8	-0.8	8.7	0.9	-5.3	119.4	-52.8	29.7
215.4	91.2	102.4	-2.6	176.3	4.2	66.2	-3.2	-3.7	150.8	4.5	-1.3
164.1	138	85.5	-3.6	1.4	-3.5	-9.3	9.8	-11.4	1.9	52.4	0.3
2.2	13.7	185.8	-5.7	2.7	-8	17.8	-0.4	-4.4	145	23.6	0.8
24.1	8.3	201.9	1.3	346	1.9	315.2	-5.5	0.2	62.7	7.1	-3.5
2.5	4.2	90.8	-1.3	0.5	1.4	26	-8.5	-2.4	-1.4	46.1	-0.5
9.6	6.7	191.5	37.2	8.9	5.3	165.8	-5.1	5.8	1.5	-11.4	20
23.5	9.1	137.2	-8.1	-14.8	139.8	93.4	-0.5	8.8	-1.3	-0.9	-5.3
-2.8	16.9	127.3	-4.5	-13.2	17.3	117.2	-10.6	1.7	19	6.6	5.5
148.9	144.6	214.3	62	172.6	-4.2	180.1	1.1	3.1	39.8	9.8	-3.5
230.2	197.7	101.8	121.7	92.3	-0.5	190.9	-1.7	16.4	28.3	3.8	0.2
222.4	78.8	185.3	1.7	110.2	-18.4	38.7	-11.4	-0.6	77.9	23.5	-2.4
158.2	163.9	106.1	1.3	34.6	-7.2	11.2	0.1	2.6	52.5	58.8	3.6
2.3	3.9	0.7	43.7	181.5	-5.7		1.9	-6.3	-5.3	9.5	-7.4
-2.7	264.7	-1.8	-1	191.5	-4.8	5.5	-2.5	31.9	72.7	32.9	28.3
32.1	-4	0.3	11.8	30.2	-4.6	-9.9	-5.5	-2.3	22.4	11	4.6
-1.2	-7.2	-0.1	13.3	36.4	2.5	4.8	-3.8	-0.8	36.5	4.8	1
22.8	13.6	153.3	-2.2	44	9.2	10.7	4.3	-5.5	34.2	4.9	58.2
127.3	6.2	515.6	107.2	228.2		39.5	3.9	0.7	7.4	6.5	-8.9
160.9	-1.5	122.8		-2.6	1.6	13.8	-9.7	2.3	1.8	-4.4	-10.2
458.7	92.7	151.4	108.9	146.8	-7.3	4.6	4.7	29	-2.1	-3.6	-9.4
530.9	5.4	151.2	40.3	4.8	-9	1.4	0.9	4.8	2.9	33.5	-9.4
-0.9	-7.2	99.1	29.4	-2.5	-3.2	4.2	18.2	27.1	0.2	20.9	12.2
4	6.8	119.2	11.2	-8.2	7.8	20.8	-3.4	19.2	0.2	35.5	-4.5
9.2	-4.5	193.9	-20	-6.8	28.3	-1.5	-4.2	3.7	-10.5	-1.2	-4.8
13.3	1.2	159.2	109.5	115.4	5.4	-2.5	2	31.3	7.8	1.2	2.3
16.2	-1.8	184.2	-3.6	169.2	-9.2	-3.5	-4.9	17.6	6.2	65.6	-3.5
62.3	1.3	77.7	2.6	27.2	-4	11.8	3.5	25.5	1.9	-10.8	-0.8
161.9	269.9	185.5	37.6	60.1	-3	26.4	5.2	7.1	-7.1	-16	1.7
173.7	14.2	-0.8	85.2	29.4	5.5	8.6	-1.8	4.5	7.8	35.1	-2.6
149.4	9.2	-3.8	23.8	-4.8	-10.8	-11.8	1.4	27.4	-0.5	21.9	7.4
60.8	-7.4	-4.5	18.7	-13.3	20.5	44.5	-8.3	55.9	-2.8	124.5	2.5
8.3	6.5	4.5	36.4	35.3	9.1	22.5	-1.5	-3.8	20	3.6	0.4
18.4	15.1	144.1	8.7	220.4	-4.6	5.4	8.3	-0.2	-0.6	30.5	-8.9
4.5	21.9	-7.8	211.3	208.1	-0.3	58.4	9.2	-1.2	42.8	-1.7	-3
193.9	-3.2	-4	-32.7	9.8	1.2	45.9	0.2	0.3	28.5	14.6	4.7
179	121.2	-1.4	-14.3	320.2	-1.8	-6.8	1.4	-2.1	3.2	2.8	4.8
259	313.7	-2.3	12.6	-20.2	1.4	9.2	3.8	40.7	0.5	27.6	-1.7
213.1	190.8	-5.2	324.5	-12		-0.2	10.3	-5.1	0.3	-2.2	9.9
9.3	112.6	-8.5	5.7	-4.9	-3.2	-3.2	-7.1	7.2	16.8	53.4	-8.9
-3.1	5.5	62.8		119.5	5.8	22.4	-1.9	2.2	-3.6	47.6	0.2
18	4.7	4.8	18.4	20.8	16.3	4.8	-1	-0.5	-1.1	56.2	-15.5
4.8	-2.2	296.1	-3.7	11.2	16.7	30	5.3	5.5	2.2	-5.2	33.5
-1.8	12.4	172.5	11.4	28.7	0.5	23.4	7.2	-4	-3.9	19.1	1.5
3.3	-3.9	226.8	-0.6	8.2	40.9	8.8	11	-1.5	25.7	9.5	3.6
395.6	1.2	184.8	2.1	-14.6	10.3	7.9	-14.7	-2.5	4.5	31.6	-3.5
119.5	-13.1	182.5	-7	0.8	3.5	-3.9	-1.7	3.1	3.8	-7.8	3.5
314.5	278.6	261.6	8.2	-5.4	11.6	29.4	-3.8	-4.6	33.9	12.4	1
328.5	22.6	-3.8	3.1	39	-1.6	0.2	-17.9	6.7	8.6	70.4	25.3
364.6	130.2	-3.5	-1.1	-11.5	0.2	-0.2	-5.5	-3.7	1.5	-6.8	-8.6
17.2	149.2	-4.5	-3.2	13.3	2.5	17.8	-0.1	4.8	-4.8	-0.8	28.4
10.5	3.8	369.7	7	1.8	0.3	6.5	-1	30.5	38.7	1.6	-10
1.8	16.2	-2.2	-5.2	33.5	0.5	42.7	-6.8	6.6	78.8	18.9	-2.6
422.9	1.2	105	-4	182.1	4.9	-0.6	2.8	-1.8	7.1	-1.9	6.8
163.8	261	-1.9	-4.8	-2.4	19.7	10.2	3.2	-4.7	8.1	3	2.4
240.6	153.5	162.4	2.7	72.6	-2.4	3.1	-2.7	4.9		59.5
83.6	11.5	8.6	-3.4	69.8	8.8	-1	1.5	8.2	0.3	1	-7.8
310.8	3.3	153.4	18.3	-8.3	-0.5	17.7	-6.3	23.3	1.1	13.4	-8.9
-0.5	-16.8	186.5	-3.2	133.3	23	-9.5	-4.8	7	-2.2	32.7	-6
15.9	2	-4.2	-2.5	95.8	58.5	-6.9	-3.2	1.2	-5.9	10.8	-14.2
29	-0.5	-4	-0.5		-7.5	18.7	-2.8	-2.8	2	3.4	5.4
11.1	-1.8	2	1.5		117.8	12.2	-7.1	9.8	-1.7	21.5	-1
6.8	1.3	5.2	-1.5		49.5	34.6	0.4	116.7	4.8	19.1	1.6
6.3	187.1	-0.7	80.8		18.5	-3.8	10.8	-3.2	3.4	26.8	-0.6
358.8	120.4	322.8	0.2		-1.9	14.8	1.7	3.8	-5.2	30	-2.4
109.5	82.8	17.1	8.9		7.3	25.7	0.1	0	23	36.4	-12.1
147.8	7.1	-4.5	-5.7		9.5	-2.6	-0.1	9	6.8	-4.6	11.8
263.6	7.2	220.8	2.4		-4.4	13.5	10.8	2.1	8.9	4.9	0.2
-48.9	165.2	210.3	-5.2		-0.7	30.1	-0.9	0.2	0.7	13	5.8
-8.4	276.4	-0.7	-2.2		-0.1	1.5	4.5	38.8	2.7	37.5	-4.8
10.6	43.9	158.4	-6.5		0.7	8.4	13.9	6.3	4.6	28.7	-24.1
7.1	0	-8.2	6		-7.5	2.3	8.4	5.2	1.3	-1.5	12.2
5.3	0.2	4.2	16.9		30.6	-0.3	-6.2	8.6	4.8	48.7	-2.7
337.5	13.5	-5	7.8		88.1	-0.9	-6.7	44.5	-3.2	31.9	12.5
156.4	-0.6	-4.1	3.4		-16.4	19.7	10.2	1.5	-4.3	3.4	76.9
378.8	-0.5	0.4	0.8		6.8	48.5	-9.7	-0.8	5.2	-1.2	149.2
232.1	9.2	173.5	10.4		-17.8	24.1	6.2	32.8	0.1	1.2	-5
-4.8	3.2	89.9	3.2		7.5	38.3	-6.4	1.5	2.1	3.2	10.7
6.7	183.2	177.4	4.5		61.9	8.5	-7.5	-4.4	7.4	4.5	8.7
11	-3.5	100.5	38.5		-1.5	0.6	-8.6	36.5	-2.8	1.5	-9.2
-1.3	52.5	221.7	0.5		19.2	23.3	7	15.7	10.5	1.1	-45.8
8.9	111.1	198.5	1.1		37.2	-2.8	-4.9	2.2	-3.6	39.6	-7.9
6.1	278.9	-0.5	6.8		109.9	5.6	6.5	-2.3	1.9	43.8	-12.2
100.5	-8.6	41.7	8.7		-10.2	29.2	-8.8	-2.3	-0.7	13.6	0.1
78.2	378.9	-1.5	2.8		-5.2	14.5	3.9	17.9	6.5		142.5
411.7	-33.8	-0.3	7.3		-7.1	32	17.2	12.6	-1	53.8	122.2
33.3	8	115.2	4.8		15.8	42.3	5.8	6.5	-0.2	-6.6	1.1
-7.5	37.2	10.7	11.6		25.8	-7.3	-5.5	-0.6	-4.8	4.9	-0.2
361.6	4.8	0	2.3		5.8	-1.5	0.6	0.8	0.1	0	-12.4
269.8	-2.5	268.5	1.6		7	8.3	-1.9	15.2	-3.5	53.6	-25.1
353.8	6.8	1.6	-4.4		29.1	7.8	7.4	-4.9	3.7	2.3	-11.2
722.5	1.7	-7.5	-9.2		-4.9	-4.2	3.7	2.5	-1.3	5	-12.5
103.8	95.2	123.8	5		52.6	2.8	-9.5	-6.9	9.9	34.5	0.9
14.5	78.5	8.6			70.6	16.8	-9.2	12.2	4.4	49.1	114
6.9	519	1.5	8.8		3.5	11.9	-0.1	27.9	13.3	7.6	223.8
6.3	-2.8	37.6	297.5		-10.3	10.9	3.2	11.5	3.9	10.7	157.1
11.5	6.5	-8.8	-6.2		-4.2	18.7	-7	-6	-1.9	44.1	1.8
12.9	11.5	3.3	51.1		-1.8	-0.5	-0.8	3.3	1.6	7.7	471.3
-4.5	12.8	131.7	4.6		2.2	16.8	2.4	23.9	1.5	103.3	5.8
123.1	11.5	227.3	19.8		19.2	32	3.2	13.4	4.9	88.1	-2.5
246	10.6	6.6	142.3		31.9	17.2	-9.6	8.3	2.5	13.7	3.8
282.1	12.5	-3.5	33.3		6.8	33.7	9.2	-2.2	0.8	28.2	-0.1
79.1	303.9	6.3	103.5		-2.7	1.2	17.7	11.1	11.2	-9.3	13.6
5.5	136	16.2	0.8		-10.7	9.5	-10.8	12.3	19.5	2.5	-15.8
4.6	339.2		99.8		8.3	19.5	0.2	1.5	11.6	128.3	12.7
32.6	5.3	181.1	78		-4.8	23.6	-8.7	0.8	41.4	54.2	0.5
3.8	441	135.9	89.5		-10.2	5.5	-0.8	2.2	-1.8	5.5	2.1
6.6	425.1	210.8	120.1		4.2	-1.2	0.2	-1.2	2.3	42	-1
12.5	79.5	258.2	161.2		33.2	47.8	-3.7	-2	1.9	-4.4	-0.5
21	11.5	116.6	127.5		28.6	5.2	-6.7	20.9	-2.5	-4.6
693.8	10.8	-1.1	-14.7		61.2	12.5	11.9	10.9	-0.8	-10	77.8
238.8	18.8	209.3	170.7			0.4	-6.7	1.7	-1.7	17.3	-4.4
304.1	9.3	0.3	86.7			9.2	2	-3.7	-2.9	-1.9	-1.6
221.4	-10.5	-2.3	-5.8			14.3	6.5	-2.2	16.6	-16.6	1.3
241.9	354.5	232.3	44.5			8.9	9	6.5	49.3	0.8	-3.7
-103.1	215.5	63.1	150.7			-0.1	4.7	23.8	4.2	119.6	-7.4
-0.2	30.6	10.5	-2.2			-9.2	-7.3	13.5	0.3	10.9	6.5
4.4	11.6	156.4	44.3			-1.8	2.8	2.4	46.7	55.6	-3.7
891	8.7	109.6	-4.4			7.4	-0.4	-1.6	4.2	39.5	1.8
134.5	13.1	15	159			-3.6	8.3	26.6	-0.5	-5.5	0.3
370.2	264.6	-18.5	82.2			4	2.5	23.9	0	81.3	-1.2
-5.5	-9.4	486.8	36.4			-2.8	-0.7	9.5	22.7	953.5	3.5
163.2	125.8	248	20.6			4.1	0.5	-0.1	0.9	8.5	-4.9
305.2	109.4	633.3	57.5			13.8	10.6	1.7	-2.4	56.2	13.3
2.2	-2	61.8	51.4			39.1	9	-0.2	-0.1	53.5	-7.6
-6	246.6	125.2	5.2			-2.3	-6.9	23.1	14.8	0.4	-3.3
7.8	214.7	39.7	4.5			29.9	2.8	-4.3	16.1	50.6	2.8
137.8	5.8	358.2	-43.7			-7.8	-6.3	31.5	22.1	267.8	13.5
196.1	283.2	21.2	218.6			29.3	6.5	1.9	11.7	2.2	1.2
-2.2	46.2	75.6	-2.4			8.7	3	51.5	8.2	57.3	19.8
160.5	14.5	-3.3	57.9			13.9	-1.5	0.5	46.5	-1.2	46.2
189.8	85.5	-3.5	35.2			31.8	1.6	4.2	-5.7	734.7	5
549.3	-6.1	116.2	31.6			4.9	1.5	-4	-4.4	146.6	6.2
-16.8	11.4	207.3	104.1			25.2	-8.5	53.2	4.6	-4.4	1.8
1	7.5	240.8	64.9			28.8	5.8	92	55.1	-12	-43.4
9.2	146.9	4	318.1			16.5	-3	4.5	-5	31.8	9.1
6	231.4	402.8	150.5			7.1	-6.1	17.1	-9.3	-0.5	-5.6
158.2	339.5	281.8	91			-6.7	-3.7	0	4	58.7	-1.7
3.3	425.8	-0.5	1.3			1.9	14.2	-1.7	72.7	388	198.1
83.5	13	123.9	195.2			4.1	6	21	-2.5	602.3	4.6
70.2	-4.5	60.2	99.9			42.1	-1.4	1.6	4.8	4.9	-2.5
210.2	16.8	61.6	4			-1.6	1.5	109.6	11.5	28.8	1.3
12.3	6.2	-8.1	249			-6.8	-4	-3.8	0.2	-20.5	13.6
20.1	3.5	185.5	21.4			-4.8	-12.4	2.1	-2.5	30.9	7.8
1.3	-11.5	420.2	78.8			0.4	-4.2	17.3	1.3	676.8	-1.7
7.2	143.6	-5.3	27.1			15.5	0.8	5.6	-0.7	68	-10.4
11.2	-18.3	348.3	50.5			28.8	8.4	-5.9	12.5	-6	327.9
29.5	228.5	325.3	82.1			17.6	-12.2	96.1	-1.5	8.2	6.1
203.7	57.9	211.1	79.5			0.2	2.2	14	0.8	37	-0.8
8.8	234.9	-7.7	1.1			-8.6	-5.8	48.5	0.7	-9.6	-8.1
131.5	207.7	3	-0.2			3.3	-10.2	61.5	-0.7	566.9	1.3
163.5	125.4	201.1	96.1			34.8	7.7	57.2	3.7	50.5	123.8
9.2	631.2	388.5	-22.7			3.2	5.4	4.2	4.4	69.5	29.8
4.5	666.3	454.6	80.8			-5.3	7.2	15.2	0.4	467.7	32.4
-0.7	-12.7	170.8	-4.2			-12.9	-6.2	30.9	1.9	26.7	3.1
-4	20.9	401.6	-2.5			17.2	-3.8	-1.5	-6.5	0	78.8
97.5	-3.2	253.5	10.5			-5.3	7.6	8	2.1	29.2	7.5
298.3	10.6	1.9	3.9			13.6	1.2	16.1	1.5	136.8	-0.8
148.2	-9.4	-6.2	-7.1			14.3	1.5	37.2	1.8	5.5	-3.2
63.8	32.8	112.3	79.6			1.1	6.5	37.6	-1.9	-2.8	-3.8
387.7	1.1	-4.5	235			13.2	-4	3.2	4.8		-6.5
-0.2	-3.4	-8.1	135.5			-1.8	-2.8	50	-3	10.5	-0.3
-2.5	134.5	180.5	74.4			4.1	5.3	-2.7	16.5	209.8	0.3
157.8	223.7	-0.8	48.1			-3.6	-1.4	1.4	1.5	179.5	34.2
-12.2	49.5	0.1	3.5			-11.5	-11.2	-4.5	15.3	7.8	2.9
7.1	102.6	224.5	34.6			38.2	-9.7	35.3	-0.6	-7.7	16.1
338.5	17.5	332.2	16.7			-16	-3	4.5	7.1	-5.3	-10.9
6.5	233.5	110.8				11.5	19.9	34.6	12.7	6.3	2.5
583.7	9.1	-8.8	59.4			5.8	2.7	19.3	-0.8	4.2	-0.5
25.8	-1.3	88.5	-3.2			2.5	-6.2	35.7	10.4	11.1	-3.1
0.2	122	0.8	1.9			8.4	-5.4	4.4	5.2	-1.6	-4.8
-2.8	98.8	296.3	-0.5			6	12.2	9.5	-2.6	-5.6	-5.9
9.4	228.5	92.8	-3.5			-4.3	12.2	29.8	-3.8	0.2	-0.7
7	-2.6	104.4	27.2			-2.8	-10.8	7.7	2.2	83.8	106
238.5	51	321.5	92.5			-4.3	-12.6	1.8	0.2	68.8	-12.8
220.3	-8.1	170.8	83.5			-6.9	1.3	51.2	1.4	43.4	11.3
205.5	-5.3	-1.6	74.2			8.8	88.5	8.7	-0.5	32.5	-6.5
169.2	108.9	6.7	4.9			-11.7	3.4	1.5	6.9	3.7	9
290.8	91.1	86.1	-11.9			-4.8	-0.2	-3.9	-2.8	1.2	2.8
10.9	601.2	170.8	-21.8			19.3	1.8	4.5	3.2	-5.7	38.9
3.9	4.4	223.8	72.5			-0.3	44	0	-5.6	-0.2	7.4
1.2	3	-3.3	5.2			8.8	6.5	28.7	2.2	-11.5	45.5
5.1	0.6	2	28.8			27.3	-4.2	-0.5	-0.8	-2.2	1.2
13.8	0.8	2	7			-8.9	-0.3	8.2	8.5	6.7	3.5
-2.7	11.7	26.9	8.2			15.7	1	0.4	4.4	32	-3
382.5	16.5	16.7	107.4			6.3	8.8	6.3	-1.7	-5.5	-7.2
188.1	65	0.2	21.2			5.2	-0.2	15.8	9.9	8	53.6
-0.5	2.8	254	56.8			-75.5	-1.4	-1	2.8	-3.8	12.7
8.5	19.1	28.6	109.3			-6.2	-9.2	2	-0.6	-7.2	28.8
172.4	209.8	330.5	39.5			29.6	7.6	-3.5	-3.7	1.5	-4.1
145.2	6.7	-13.8	87			5.6	1.7	10.5	0.6	43.2	0.9
-0.6	1.4	108.8	101.9			-2.6	-8.2	28.5	-2.5	0.2	-5.1
6	249.1	-2.9	167			51.2	1.2	27.3	7	29.5	-12.7
-5.4	355.7	236.2	26.8			7.1	-1.7	12.9	-0.6	15.4	3.5
257.8	300.9	62.6	89.5			26.8	64.2	13.8	2.2	-2.6	-7.2
5.2	293	174.3	105.4			18.2	-8.5	44.2	1.2	92.4	60.1
1.2	-0.7	464.2	14.1			-2	9.9	20.8	0.6	4.2	23.1
47.9	2.8	-3.9	-5.1			8.1	1.5	19.2	0.1	2.4	108.2
219.8	1.1	569.3	2			433.7	37.5	8.6	9.4	6.5	-4.2
482.2	5.4	-91.5	37.7			3	14	54.9	3.3	-8.5	16.3
-1.6	8.3	135.5	14			-4.2	-1.3	8.5	1.2	-0.4	10.3
10.4	223.4	72.2	71			7.9	-3.6	4.6	4	88.8	40.5
1.5	180.9	78.8	3.8			-3.6	-5.5	0.1	5.1	346.9	2.3
0.3	113.4	-7				-10.2	7.8	-1	3	2.6	-27.4
-13	56.6	0.7				25.2	13	-10.5	16.1	-1.8	3.6
208.2	158.4	296.2				-0.1	14.7	-1.6	4.2	15.8	-2.5
399.4	498.1	80.1				1.2	-12	-0.1	3.8	-2.8	39.6
145.7	397.2	162.3				1.6	84.3	6	20.9	82.2	21.5
112.1	7.2	347.6				-13.8	59.7	-0.5	-2.5	74.5	7.5
150.9	10.1	4				-5.7	-5.8	4.5	11.3	-5.2	67.8
256.5	25.6	247				-39	4.5	65.9	0.1	273.4	18.4
586.6	-0.2	248.1				-10.9	3.1	6.7	67.5	75.2	-0.8
25	-2.8	118.8				12.1	-6.7	12.8	-7.2	16	51.5
187.1	200.4	58.9				-2.9	-2.6	1.2	-2.3	2.8	20.3
3.2	2.2	236.5				27.1	-9.9	-7.5	-2.9	-5.3	30.3
-8.8	287.3	82.5				20.2	10.9	72.7	-1.2	-12.5	-7.5
59.1	-121.5	430.2				18	4.3	19.1	0.2	73.2	-6
1.8	-7.5	66				-4.5	-48.5	-5.4	1.3	8	7.8
15.3	9.1	64.8				4.8	2.9	14.4	0	8.3	3.1
169.6	175.7	135.1				-3.2	-12.3	-3.8	-5.9	4.3	-1.6
199.5	45.8	232.4				-1.9	11.8	26.8	28.5	9.3	45.2
6.8	96.6	-2.2				-4.4	-3.5	8.9	35.2	28	46.2
25.9	52.5	0.4				4.4	-2.6	-4.3	2.9	-10.5	7.2
20.2	738.5	45.9				19.3	-11.8	22.2	2.8	37.4	3
1.6	1.9	4.5				40.2	101.4	-3.9	-2.5	21.8	0.1
-3.8	18.2	64.7				67.3	148	-2.4	4.3	25.7	19.7
342.3	2.3	71.4				43.5	21.1	33.7	-8	1	8.8
289.8	195.4	331.1				21.6	-21.4	60.3	5.5	279.2	-1.2
741.9	223.4	255.1				25.8	-1.2	4.5	-0.5	34.8	-4.7
0.4	11.8	94.8				-27.1	6.8	-3.4	6.2	1.2	21.5
9.2	65.8	-0.9				124.1	4.9	15	3.3	7.5	-52
40.2	213.9	-0.1				27.6	5.5	17.4	7	68.3	1.5
1.9	1.4	312.1				0.9	5.4	71.6	-0.9	-36.6	-3.8
715.5	-3.5	64.7				25.7	-16.3	3.5	8.7	6.8	43.4
8.6	3.8	166.8				17.7	25.2	2.8	80.5	115.7	1.1
6.8	1	118.9				315.3	-5.7	27.5	2.1	44.8	4.5
10.8	260.5	112.7				7.5	-19.6	30	9.3	59.9	3.5
-2.9	103.4	137				5	3.9	-5.5	0.9	107.9	40.2
4.8	150.8	77.9				80.8	-16.2	3.5	4.5	44.5	11.5
47.1	224.1	387.5				-10.5	28.5	8.2	-1.4	-0.7	3.9
4	-6.5	199.8				31.8	5.1	-7.8	-4.6	0.2	-3.7
221.5	258.7	101.7				16.6	9.7	16.8	-1	3.5	24.3
105.7	197.2	338				-16	1.2	0.2	-4	99.8	10.4
120	283.5	0.7				1.9	42.2	-4.8	-5	85.7	39.3
451.2	87.2	-2.7				2.5	-11.2	3.5	-2.5	64.5	-6
555.5	9.2	391.9				-11	7.2	-3	-3.3	204.5	-4.5
10.6	7.6	453.8				151.3	8.8	4.2	1.3	-0.3	-2.2
4.5	6.7	402.8				110.8	10.5	-2.1	3.8	60.1	47.8
135.1	163.3	1.8				14.8	-8.4	-0.7	1	-2.4	22
382.2	105.2	-0.4				30.4	176.7	13.5	1.2	-3.4	170.9
2.1	222	113.4				-9	6.5	18.5	3.5	4.1	-0.2
-0.2	47.5	-2.6				15.1	0.3	23.4	-2.6	26.6	31.5
23.2	72.5	144.5				0.6	-3.3	-6.6	-3.2	18.5	0
7.5	285.8	-4.7				94.3	78.4	6.3	-1.8	88.2	5.4
6.5	6.8	2.5				1.6	-2.8	-1	2.8	33.4	-7.2
-0.5	1.9	218.9				6.2	6.4	0.4	0.8	30.3	0.2
2.2	45.5	0.3				2.1	23.1	-2.4	18.6	222.5	-0.9
7.5	-1.2	364				-3.9	-3.5	5.7	8.4	6.6	1.9
13.8	1	298.2				28.8	6.7	-3.2	2.2	-3.3	-0.3
-4.2	133.5	-4.2				17.6	199.1	43.8	1.1	11.2	-1.2
133.8	-16.5	77.5				7.5	75.8	42.1	1.2	58.1	2.6
13.5	27.9	166.2				79.5	-9.8	110.6	3.8	0.5	-0.3
291.4	6.4	198.9				134.5	-1.5	71.9	31.5	-4.7	253.2
174.7	2.6	-6.6				105.7	-0.2	13.1	-9.2	0	13.3
10.3	9.2	274.7				-7.6	1.4	26.5	-7.5	-7.7	8.3
-0.2	7	293.2				35.3	7.5	-2.1	2.1	16.7	-2.2
4.2	-5	318.1				-28.1	-7.1	-1.5	-0.9	5.8	6.4
5.6	272.4	-7.3				-1.3	17.7	11.5	-4.2	60	162.2
-2.9	391.4	571.9				46.5	2.5	15.8	-3.8	37.6	197.5
5.5	378.2					22.8	2.5	15.8	3.5	46.4	-3.6
5.5	191.6	-9.1				7.6	331.3	12	-4.2	-5.5	1.1
-8.8	-12.7	176.1				20.8	2.6	4.9	21.3	117.7	1.9
164.5	0	158.6				1.8	-8.1	-0.2	17.6	0.5	-62.6
7.2	-4.3	-15.2				3.2	-13.1	-2.2	-2.2	-9.4	123.3
1.2	7.8	167.2				16.8	0.6	8.2	8.5	94	0.4
7.7	7.6	66.2				12.4	10	0	-2.2	50.8	14.4
20.4	165.8	293.8				5.7	4.7	-1.1	3.7	9.5	13.2
7.5	99.1	282.6				-11.5	6.4	-3.1	-1.2	-17.3	-0.8
254.9	7.8	36.7				3.7	3.8	-0.9	2.9	12.9	-3.5
0.2	1.5	220.6				6.2	-2.8	2.9	15.5	26.8	59.2
15.4	254.8	67.4				11.4	-0.3	2.3	18.8	-1.5	-5.3
14.5	224.3	78.2				-10.9	-1.4	9.1	1.6	82.1	7.2
-2.5	170.1	84.9				-6.8	15.5	4.7	1.6	60.6	6.3
96.1	-1.2	120				-1.1	0.4	5.8	25.2	44.8	1.4
155.8	411.2	128.8				-2.6	2.6	15.9	3.9	-0.1	-3.5
-2.3	-3.2	4.1				13.8	5.2	0.6	20.2	79.7	0.3
10.7	8.5	46.2				51.3	12.7	65.9	8	-7.5	-3.8
-8.8	5.2	85.2				0.5	8	-3.5	2.7	8.3	-1.1
-9.2	0.9	6.1				6.4	0.2	-1.4	-0.8	-5.3	0.3
-0.6	305.8	46.8				10.9	7.9	-3.5	6.1	5	1.2
-21.5	138.7	80.5				5.5	-0.2	25	10.5	56.8	-1.8
582.7	14.4	0.5				1.6	-3.6	3.4	2.3	34.4	2.8
7.3	-2.7	11.5				-3.3	-12.3	3.2	32.8	44.2	0.3
-7.5	-2.2	40.5				-10.8	1.7	4.3	-2.1	-10.6	-4.9
22.6	14.1	293.3				6.9	3.2	76.8	15.9	1.4	5.1
28.9	-2.7	278.5				34.6	0.7	-0.4	12.1	7.4	-1.4
6.2	-1	175.1				10.8	5.1	4.1	10.2	24.7	2.6
8.8	78.5	37.2				-6.7	4.3	26.1	25.5	-9.5
12.2	163.2	172.5				1.9	-0.3	5.2	5.4	-2.6	4.5
15.8	413.1	113.9				-6.4	-2.9	-3.8	-5.7	49.2	0.5
1.4	22.5	-19.8				-2.5	4.5	-7.7	1	118.8	6.7
0.8	52.5	80.2				-6.3	-0.8	-3.8	3.3	55.5	4.7
67.5	-1.9	-2				-2.4	-5	5.8	-5.7	9.9	8.2
14.4	9.2	28.4				3.3	2.2	0.1	-6	315.2	-4.2
15	825.8	97.2				-2.5	5.7	2.2	24	6.8	0.2
2.4	172.2	2.1				-5.7	1.5	47	4.2	18.2	-4.1
4.9	350.1	32.2				-0.8	-2.7	14.3	-2.2	6.1	2.6
-3.3	8.1	-11.4				5.4	5.5	-4.5	-1.5	-0.5	-6.1
5.7	9.4	10.4				-6.7	-6	42.8	2.5	-8.3	-2.3
5.8	11.3	87				0.8	-3	1.7	0.8	6.7	7.6
-3.4	5.2	51.8				1.1	-0.8	6.8	1.9	136.8	7.3
5	14.2	84				1.2	-0.5	-5.4	4.4	12.5	-8.3
-5.7	23.1	50.5				-5.2	3.3	17.8	-3.5	6.9	3.7
-6.5	171.3	65.3				-1.7	6.6	8.3	68.9	-50.8	6.7
11.8	224.1	87.8				0.7	-1.7	8.5	2.8	4.9	3
0.4	382.3	22.5				4.1	-8.8	8.2	1.2	4	7.1
0	18.3	220.5				-1.6	7.8	10.2	12.2	-6.9	-2.2
3.8	9.5	70.8				2.6	1.8	0.5	24.9	-64.1	7.7
9.8	41.1	159.7				-2.3	6.1	6.7	-1.9	-0.4	29.7
5.1	70.7	2.1					-0.3	-2.2	7.2	11.4	-1.3
8.5	128.1	122.8				9.5	-2	1.4	3.9	7.5	-11.8
-3.5	9.5	130.2				35.2	2.5	51.8	26.1	20.5	13
23.2	5.5	137.4				-2.2	0.2	-4.9	-3.5	29.8	43.5
12.2	186.6	96.9				78	4.1	0.2	-0.3	37.9	19.8
2.5	146.8	188.7				0.3	3.1	-8.1	3.2	-7	-16.3
28	136.9	101.8				-7.8		1.3	24.7	1.4	-2.2
29.5	56.1	53.6				7.2	0.5	3.8	1.2	0.5	-6.2
2.9	-2.5	85.9				27.7	1.2	27.2	1.2	18.5	64.5
9.6	177.9	21.5				49.8	-0.2	24.7	4.8	2.3	11.3
-0.7	194.7	1.3				20.2	7	10.4	20.2	-1.5	7.8
8.5	49.9	172.6				2.1	7.8	1.2	1.5	-0.7	1.2
1.7	16.1	69.8				64.9	1.3	23.2	5.6	11.2	-2.5
35.9	11.8	136.5				13.9	-3.9	7.4	-0.4	85.8	9.4
19.8	-2.1	112.3				14.3	-21.5	1.3	1	16.5	-7.2
-2.7	230	61.8				32.8	35.3	-1.2	-7.4	-1.1	260.8
4.8	-3.9	180.9				62	-1.5	-1.7	23.1	299.8	7.4
3.3	3.2	0.5				69.8	-2.8	-1.2	7.8	11.4	-3.6
-4.7	1.7	-7.4				-2.5	6.5	24.5	-2.2	19.2	-1.3
8.5	100.8	154.1				3.7	4	36.6	-5.2	-4.9	1.2
3.4	23.6	111.2				32.5	-10.2	5.7	-0.3	33.2	1
6.9	-4.6	65.8				45.9	-9.5	-7.3	-12.8	168.9	8.9
19.5	10.9	360.3				18.2	99.5	-3.2	-0.2	51.2	1.2
34.3	59.3	283.4				71.6	-3.2	-1.3	2	-2.2	-4.1
19.6	195.4	12.4				15.7	-33.5	-0.2	3.5	-0.2	4.5
9.6	-0.5	305.5				385.3	-5.5	0.1	16.5	4.5	-1.7
-7.3	12.4	-4.6				16.5	1.2	0.9	4.1	20.1	-11.2
2.8	-6.2	12.8				79	0.2	-10.3	-6.5	37.2	-11.2
24.8	-2.5	2.7				3.8	326.1	-6.9	5	-4.5	13.5
1.8	16.2	-2.5				-9.1	10.8	15.4	-3.5	-4.2	-8.2
9.5	3.2	99.2				-4.4	-43.9	1.3	189.1	-2.6
-6.6	-2.2	91.5				-19.8	42.8	-0.4	138.3	-1.3	1
4.6	11.8	-4				38	7.2	1.1	67.8	-7.4	-5.2
13.7	31.2					5.8	-44.5	108.2	18.4	5.2	5.4
3.5	20.1	-1				28.8	-4.6	17.6	2.1	-0.9	4.2
-6.2	8.5	4.2				-131.9	104.1	-1.5	19.2	73.8	-8.7
4	12.2	104.8				-0.5	-19.1	-2.2	8.7	22.7	4.6
6.5	0.4	0.9				134.2	0	-4.2	0.7	-3	0
15.5	18.9	140.5				-89.5	1.1	7.4	24.2	1.9	1.7
14.2	8	163.6				76.9	-9.1	-0.5	87.4	3.5	2.2
5.4	0.3	23.5				49.5	-0.7	-7.5	3.2	0.4	-12.1
3.4	0.5	9.8				-25	87.7	13.2	53.3	20.8	3.9
3	-4.8	9.9				140.9	17.9	2.8	-11.4	18.9	0.2
13.9	19.8	-5.5				42.7	2.8	2.2	-3.2	-0.8	1.1
19.2	1.2	193.8				49.8	-36.2	-8.5	2.8	5.1	2.9
6.3	16.5	300.4				-26.2	9.8	2.7	11.1	-0.8	4.9
5.1	1.6	-10				-1.5	-28.1	1.6	-10.3	-0.7	-1.8
3.5	-2.4	-0.9				205.9	121.2	65.5	60.8	1.6	1.6
8.2	2.1	201.4				20.3	-19.8	-6.5	-7.6	-3.8	84.9
	-11.1	27.4				244.7	2	4.8	-1.7	2.7	7.9
-5.7	6.2	270				344.6	-63.9	33.8	-4.2	92.4	42.2
125.5	12.2	141.6				155.5	-7.5	2.8	1	25.9	-10.6
150.6	5.9	-0.2				-6.8	-10.8	6.2	8.2	0.4	1
85.7	1.6	5.5				93.9	3	-3.1	12.4	4.1	7.2
1.6	1.2	-24.3				55.1	-5.8	5.7	9.4	-0.5	11.2
-7.7	1.2	341.3				2.5	4.8	0.5	-1.1	-2.2	1.9
298.5	-10.7	37.7				31.2	-0.4	-7	3.5	-2.2	2.8
154.2	-1.3	220.7				62.3	28.5	2.5	45.4	2.2	-0.9
12.8	4.1	18.8				30.4	70.7	0.6	18.8	5.2	7.2
179.8	10.2	12.1				21.1	21.2	5.4	1.4	3.5	-2.7
219.9	4.2	16.6				245.6	-119.5	-1.2	1.4	6.6	-0.5
131.5	4.1	279.9				0.6	-5.8	0.5	17.2	1.1	0.8
-6.8	14.2	210.7				15.5	114.8	6.6	1.5	-2.1	-2.8
-1.3	-0.2	2.4				28.8	22.8	9.2	22.8	1.8	-2.4
451.2	3.8	-7.3				44.4	3.4	-4.4	-4.8	1.1	4.6
75.2	-1	-5.3				9.5	73.2	3.1	24.3	6	-8
340.6	-4.2	12.2					-12.6	0.4	2.4	1.1	-1.2
322	12.7	29.5				6.3	2	4.1	-8.5	6.3	-4.9
240.1	8.8	62.2				42.9	-23.9	1.7	10.7	14.5	-20.7
217.3	0.2	-4.5				65.2	-35.3	4.1	-10.5	27.8	1.7
270.8	2	216.6				59.6	5.6	0.8	-0.9	21.2	6.5
1.7	5.6	289.2				6.2	-27.3	-3	-0.2	5.1	-1.5
314.9	-0.7	209.9				105.5	13.1	-11.3	21.5		4.6
369.4	4.2	23.5				19.1	-6.5	1.5	4.6	22.8	2.2
11.4	3.2	-3.1				8.5	93.2	1.6	0	7.6	15.9
265.4	-2.2	-6.2				-0.2	285.1	-1	0.6	6.4	5.3
-5.8	-1.1	0.1				80	-25.5	-1	0.8	19.2	10.2
461.9	4.2	226.3				114.2	-11	0	-3.5	4.2	-11.2
-0.6	-3.8	13.3				160.9	-5.8	-0.6	30.6	-0.1	-2.7
-9.6	21	-0.8				-6.1	-58.4	-1.4	-1.8	6.8	-4.4
433.9	-3.8	-3.9				154.8	27.4	1.8	4	6.5	13.5
-15.5	8.3	18.2				97.2	6.6	-4.7	1.6	6.6	-4.8
58.5	3.2	298.8				58.3	0.2	1.9	37.3	-2.6	-1.8
102.5	-0.8	-1.3				63.5	0.7	13.2	29.1	22.8	0.3
164.8	8.6	12.3				119.2		16.2	3.6	114.7	-2.9
749.3	30.3	128.6				4.5	2.1	45	4.5	18.6	8.2
174.9	-3.1	195.9				79.9	-0.9	-4.7	29.9	-5.7	0.5
480.2	1.8	85.8				13.8	2.9	-0.8	-2.2	-4.7	2.7
-19.8	2.5	17.7				70.2	-1.2	4.8	-2.2	4.5	1.5
315.2	-0.1	14				7.1	-11.7	1.6	6	1.2	40.2
351.8	0	2.3				0.3	-1.8	27.7	5.1	6.4	9.7
362	0.6	0.8				195.5	-1.2	5	10.3	5.8	2.8
165	-5.7	-4.7				9.5	-12.5	-2.6	53.8	2.9	-1.6
6.3	-6	22.5				311.7	-10.3	-1	-2.6	15.8	1.8
985.4	7.2	-2.8				73.2	14.8	-1.6	-14.1	41.6	1.1
-7.1	53.5	5				73.5	-6.6	5.9	12.1	63.2	-0.1
198.3	-0.9	3.4				179	159.2	22.3	5.5	-3.7	3.8
402.3	145.5	8				10.1	-9.2	37.7	3.9	119.2	4.4
208.8	5.1	-8.4				51.4	-0.5	27.1	-0.9	20.6	4.8
674.7	101.6	2.9				3.3	13.3	3.9	3.4	0.2	16.8
413.8	112.9	2.5				92.5	-2.2	-3.4	-6.8	331.6	-7
334.6	-6.8	-16.2				81.3	1.4	-4.2	40.2	21.1	0.3
317	359.8	17				5.1	-25.7	10	50.8	7.6	15.6
372.8	65.3	3				7.8	-4.2	0.6	35.7	30	1.8
411.1	2.3	3.8				4.4	154	3.5	5.3	104.8	23.4
97.2	7.8	31.2				-5.8	2	4.9	-4.3	183.7	7.1
165.7	92.8	8.9				3.5	1.5	-1	40	108.5	69.5
229.5	-10.2	351				144.6	-0.2	10	5	336.3	10.8
534.1	81.1	7.1				-0.5	2.2	3.9	-4.2	89	21.5
-19.2	248.5	11.8				47.9	46.1	74.5	1.8	221.4	8.5
127.8	68.5	104.5				-7.2	-5.4	1.7	-6.8	139.6	0.9
-3.9	215	20.5				88.5	-11.2	-5.3	6.8	158.9	-5.3
110.7	178.6	29.6				-5.1	41.6	97.4	1.9	-0.4	-1
330.2	182.4	13.3				132.2	7.3	1.9	-1.8	124.2	20.8
278.9	235.6	33				34.5	-3.3	1.2	8.3	-6.9	26.8
328.8	125.8	-2.9				44.1	2.8	12.5	47.2	191.5	53.8
250.3	62.4	3.5				15.2	1	3.5	8.5	15.8	-1.9
280.6	3.7	14.8				53.5	-0.9	30.5	21.2	21	22.8
294.2	50.8	31.5				12.2	4.8	2.5	30.8	1	6.7
343.2	-7.4	1.9				10.6	9.4	-0.3	-5.2	165.3	0
250.4	179.6	15				-8	-16.8	-0.7	-7.1	1.3	10.5
-10.7	342.5	5.1				11.1	-15.8	-4.9	-0.6	2.5	27.5
333.6	178.5	4.4				39.2	13.2	-1	-4	184.3	-2.4
84.6	204.4	13.8				70.6	7.5	5.3	76.5	137.2	26.8
191.7	158.8	16.8				73.2	-5.4	-4.7	1	3.5	48.8
137.7	-0.6	336.9				9.1	-2.3	-6.6	0.5	-4	-1.5
0	215.4	5.3				0.7	-0.2	32.8	0.5	84.6	16.2
330.2	-20.5	14				-6.8	-1.6	0.5	2.4	69.2	6.5
228	194.3	82.2				0.7	2.5	4.9	21.6	16.6	8.1
200.5	256	0.5				-1.4	4.9	43.2	23.2	57	7.5
181.9	351.8	11.5				0.6	5.3	-1.5	4.2	173.4	7.2
197.2	247	14.1				66.2	6.2	7.4	5.5	-21.2	12.8
409.2	6.8	-7.6				14.2		-3.2	49.8	66.5	1.4
104.1	-1.5	14.8					8.8	1.5	10.4	149.5	-1.2
-3.3	698.3	-0.1				40.5	0.2	1.3	0.5		7.1
714.9	474.8	-7.5				-3.8	-3.5	4.9	-11.8	115.5	5.3
336.9	165.7	13.6				63.7	-3.2	47.6	-2.1	0.1	31.4
37.5	107.8	13.5				-1.1	-1	-0.2	-3.9	43.2	0.8
269.4	98.3	14.6				8.5	4.5	0.1	-3.4	67.5	1.7
-8.7	-7.8	6.7				-4.2	3.5	13.1	-6.4	-6.5	-4.8
144.4	146.4	13.3				1.8	-6.7	3.3	18.2	2.5	7.4
271.5	244.2	5				1.6	1.2	42.4	14	47.8	7.2
515.3	-8.8	11.7				28.6	0.3	-4.2	1.8	82.3	39.4
-9.5	238.8	2.2				29.8	-3.5	-5.3	11.8	-3.2	20
516.8	21.8	26.3				4.8	7.2	-3.3	6	61	1
129.3	386.2	93.5				11	2.8	-0.6	52.1	92.6	9.6
238.7	240.9	22.7				65	-0.8	1.5	-4	34.4	13.1
170.6	391	19.3				9	0.6	7	138.7	138.8	27.2
-4.5	420.8	3.2				105.2	-3.7	-1.9	-3.4	14.5	14.2
490.4	318.3	32.2				7.9	0.7	-1.9	-4.8	17.9	-1.2
690	168	12.8				73.8	-8	-5.8	-6.8	45	28.5
184.8	64	-5.5				125.7	9.2	5.9	-21.2	53.3	12.8
120.5	61.3	18.1				-4.8	-7.4	14.6	1.7	13.2	23.1
175.5	134.1	16.6				69	-5.8	-2.5	28	9.8	40.3
-3.2	86.3	28.9				108.8	3.4	-1.9	30.3	-2.4	-3.9
302	167.4	151.1				-3.9	4	34.5	-1.4	25.2	2.3
290.3	192.3	2.8				104.2	-6.2	5.1	-5.6	36.9	1
338.2	214.4	31.5				51.5	1.2	8.7	-2.5	125.2	3.4
251.1	22.1	27.5				-6	-4.2	45.1	84.1	82.1	3.6
105.8	161.7	13.9				38.7	2.8	3.4	-9.9	5.5	19.6
2.2	-9.4	-0.2				6.3	-3.3	5.2	11.2	31.7	18.8
-17.8	-10.8	24.3				70.4	-7.2	5.6	-1	22	0.2
305.2	159.1	-8.8				-4.5	0.6	12.5	0.5	107.5	11.8
265.1	109.1	6.8				-3.3	52.5	1.9	4.5	175.2	24.1
486.5	79.2	27.9				63	22.8	8.2	4.2	20.9	3
234.8	103.9	10.9				30.4	-16	98.2	6.2	1.6	14.7
176.5	31.1	15.2				69.3	5.9	10.1	27.3	51.9	7.7
271.5	49.5	8.5				46	11.7	29.7	16.6	42.7	6.8
115.4	58.2	32.6				40.8	75.2	28.3	48.1	46	23.6
343.8	61.2	104.5				143.2	2.8	45.5	6.7	63.9	28.2
364.5	8	1				129.9	5.1	38	9.7	2	15.1
630.2	103.5	57.9				115.8	10.9	-6.3	35.9	55.1	16.5
201.8	181.6	0.7				78.2	13.3	36	7.1	13.8	-1.7
220.5	205.4	9.3				5.5	-1.6	-3.8	4.2	26.6
508.4	167.8	-4.5				4.5	84.2	16.5	2.5	-0.2	-3.8
387.6	293.2	1.5				118.8	35	1.2	-7.6	14.2	-5.7
314.7	122.4	3.2				83.6	-2.9	3.8	96.1	4.2	4.1
129.9	0.5	8.8				2.5	1.1	-1.7	-18.8	46.1	2.8
-0.7	115.7	20.8				30.1	-12.8	1.8	8.7	8.3	-0.1
119.3	3.8	18.3				126.2	0.8	0.3	-1	-16.5	64.8
232.1	301.5	42.7				147.8	50	34.8	-8.7	-10.1	206.1
310.4	171.5	231				48.7	1.1	4.2	-0.6	90.6	-11.5
502	118.6	3.5				181.8	-1.1	55.5	-4.5	8.9	-5.4
1014.2	98.4	18.5				100.6	-0.7	4.5	-6.2	2.4	137.4
345.2	3.2	32				-11.2	1.1	-4.2	2.3	22.4	-3.8
220.2	171.2	-1.5				115.2	-6.5	6.1	-2.7	68.5	16.4
315.2	203.2	8.3				63.2	2.3	9.2	286.8	10	11.5
346.8	-16.8	23				-6.2	1.8	5.5	13	-9.2	-2.8
329.5	348.8	67.5				67	7.3	80.4	-6	2.2	-12.8
-0.2	149	19.2				24.1	17.6	2.9	-21.1	45.4	183
-3.7	276.7	7.8				144.6	-1.8	1.7	65.6	7.2	17.2
50.3	138.2	-2.2				-1.8	12	-3.9	-7.9	47.3
300.6	145.2	-1.1				25.6	-1.8	-0.7	6	4.5	2.4
222.3	114.3	5.8				64.9	14.6	1.4	-1	-0.7	54.5
233.4	32.4	32.2				-0.8	7.4	-2.6	-7	26.2	74.9
354	1.5	11				22.1	-6.2	-0.7	-14.8	7.2	27.6
1035.3	95.6	17.5				12.3	-6.3	21.5	4.7	27.7	56.2
339.7	94.5	26.1				-1	30.6	70.8	-5.9	112.4	3.8
310.8	117.8	22.8				58.7	-30.7	2.9	1.5	-11.4	8.1
208.5	189.4	5.2				210.8	-14.2	1	1.9	76.5	-10.8
296.5	4.1	16.5				89.5	-3.1	7.6	-5.5	45.4	36.2
541.8	183.2	7.1				13.7	-1.6	2.5	7.5	-3.6	3.5
284	162.2	28.8				97.7	-3.3	9.8	3.7	71.7	241.1
276	11.8	20.2				62.9	-13.1	-2.6	42.5	-5.6	-9.8
286.8	85.5	38.7				124.9	11.1	0	-4.2	12.8	0.5
1	132.5	-6.5				19.7	70.8	57.6	-2.2	12.2	-5.8
665.5	-8.7	12.5				6.5	-7.6	3.2	54.3	-4.8	174.1
391.4	381.2	121.6				-3.1	7.2	-4.2	24.5	14.9	-2.3
310.6	390.2	15				-0.4	-3.5	6.8	3.8	5.5	201.1
310.5	290.5	11.2				69.2	5.5	94.3	65.2	-5.4	54.9
204.6	255.6	121.4				18.2	-11.3	-2.6	37.2	226.5	-6.7
146.7	176.8	10.2				18.1	10.2	2.8	40.7	0.8	19.6
183.3	103.5	16				26.4	7	7.3	-1.5	132.2	93.2
482.2	65.8	12.5				-10	4.9	12.6	5.1	138.8	-11.5
334.8	88.2	-3				-5.5	-1.8	10.1	3.8	57.9	0.5
313	12	14.1				6.3	8.4	38.7	19.9	65.3	-8.3
437.5	221.3	1.5				6.9	-1.2	-3.5	15.2	45.2
395.4	241.8	12.1				27	8.2	29	2	5	-6.8
570.9	200.1	36.8				73.8	-13.9	3.8	1.6	29.7	36.5
308.4	654.4					98.8	53.2	-4.1	20.8	46.6	11.5
371.2	348.8	166				43.9	-11.1	23.2	1	41.6	3.2
390.5	128.3	7.9				59.2	2.9	70.6	12.9	102.5	-8
471.2	102	-3.4				60.5	70.5	27.8	21.1	20.2	19.5
410.8	184	0.7				55.1	-2.1	0.5	57	61.8	118.5
412.6	106.8	60.6				39.7	3.1	-3.8	2.4	2.3	115.9
158.2	182.8	6.5				4	51.4	0.6	68.8	34.2	241.4
190.6	108.2	43.2				3.5	-16.3	31.5	59.6	46.2	-17.8
331.8	117.3	181.5				52.5	6.2	-0.2	-4.2	20.8	0.5
264.5	-0.2	366.2				23.5	6.9	7.8	-1.2	62.2	-55.3
201	259.1	8.3				33.8	10.1	6	5.1	58	-8.8
152	50.4	97.8				11.5	-8.2	24.5	-1.7	119.5	185.3
377	192.9	89.1				35.3	-6.4	-5.5	1.4	60.5	5.7
463.2	122.6	209.7				37.8	30.1	44.2	165.1	44.6	166.5
536.5	46.5	243.6				1.8	5.7	39.9	54.2	98.5	11.3
156.8	183.1	492.5				33	-0.8	-2.5	7.9	149.2	94.5
270.4	-6.6	121.8				73.2	4.5	6.3	80.5	-0.7	140.5
432.7	-5.2	118.2				13.3	1.4	46.8	21.2	38.7	-26.9
2182.5	1045.7	-12.5					29.2	16.7	2.9	149.2	8.2
151.4	168.5	546.5				51.8	25.2	3.8	43.9	63.4	371.8
388.6	187.9	109.1				28.3	9.9	-3.7	180.3	76.8	-36.6
145.1	-11.1	33.5				1.2	4.8	2.1	11.4	24.4	-17.4
361.7	-5.6	155.9				37.2	24.3	1.5	2.3	29.8	317.7
-81.1	186.7	191.2				51.4	-0.2	20.7	136.1	-4.2	-48.5
311.3	125.5	-12.8				-4.4	5.9	10.8	26.6	49.1	-8.6
149.3	348.4	252.2				2.5	-4.3	5.5	-23.9	97.7	344.4
217.7	159.6	114.8				2.8	1	14.7	0.2	60.8	26.3
384.8	-9.9	128.3				6.6	-2.9	3.7	3.5	91.9	-3.2
785.2	301.3	1165.9				15.6	3	6.8	14.4	2.6	6.4
183.8	8.9	178				23.1	0	31.1	-3.6	43.5	84.6
219.1	108.8	61.2				50.6	-5.2	-6.2	-9.8	28.8	10.3
247.7	76.8	111.7				4.5	-15.2	-7.4	0.3	44	-1.4
253.8	111.9	65.7				-0.1	5.2	70.8	8.4	28	-11.5
423.4	146.1	95.7				54.7	-4.3	-3.4	4.6	23.8	-17.6
236.1	134.7	169.9				10.2	-3	76.6	-4.9	-1	-6.5
137.8	82.5	167.5				193.8	-1.9	0	2.2	-4.7	0.2
336.7	-2.2	87.3				4.6	3	3	52.5	59.4	1.5
478.3	219.8	197.8				7.1	3.8	5.9	21.1	42.9	-1.8
169.5	157.3	379.2				13.3	4.1	58.6	-3.9	78.2	0.6
715.3	96.9	204.9				35.8	11.7	1.5	-1	27.2	6.7
189.3	-4.7	-8.2				-3.8	4.8	-6.5	35.7	61.1	1.8
243.8	105.9	1.2				-5.6	-6.8	23.5	5.5	3.2	6.5
282.4	56.5	41.5				12.8	-0.5	2.2	7.6	3.2	-2.2
304.1	411.1	148.5				6.4	1	30.6	26.7	64.3	3.9
237.2	230.5	326.1				-9.1	4.2	-3.1	6.8	65.4	3.3
129.2	163	191.7				236.5	-5.9	30.4	-0.8	3.8	-4.5
388.9	62.2	103.1				13.1	2	4	-22.1	83.9	0.2
225.6	615.6	301.9				0.7	6.2	46.8	-1.1	18.8	-7.5
346.9	371.2	122				4.8	4.5	-0.1	9.5	1.1	11.6
171.2	332	159.2				36.2	-8.2	-2.5	28.9	54.3	5
224.1	167.5	149.2				2.5	-1.3	-11.1	15.5	69.7	-2.2
244.1	438.2	96.5				150.5	-0.2	63.7	14.7	61.5	-4.3
407.1	172.7	340.9				6.5	0.5	4.2	3.4	-4.8	5.2
260.4	194.2	121.3				-1.4	-0.2	21.7	-8.8	181.5	15.3
131.2	24	55.7				-6.1	-8.9	17.4	-29.1	38	9.8
202.9	-7.2	349				14.4		4.4	-7.8	71.9	1.2
149.5	22.2	142.9				15.2	4.8	1.6	14.8	30.2	4.5
365.7	51.5	638.5				-7.8	-5.9	4.7	42.1	47.4	-1.6
239.5	302.1	1182.7				36.9	0.2	18.1	-11.3	77.2	7.8
145.2	202.1	127.3				1.2	0.6	12.5	42.1	97.8	3.2
405.2	113.4	156.8				15.5	4.8	32	-4.4	-0.5	-7.7
436.3	1.1	211.4				-19.9	-14.3	3.4	-17.2	2.3	12.5
84.5	137.2	-24.8				19.1	48.3	49.2	10.2	15.5	5.2
176.8	-18.2	-1.3				-18.8	-12.2	3.3	10.9	55.9	-6.8
450.8	-27.8	62.8				30.2	-0.9	10.8	-4.5	12.4	0.7
196.5	267.4	75.8				79.3	-6	-5.8	8.7	1.2	2.2
706.6	271.8	94.2				18.9	3	-1.1	-5.5	95.5	2
465	108.4	424.3				-10.3	-5.8	0.5	6.7	-1.4	3.3
338.2	258.2	304.7				-36	13.3	1.2	12.8	29.3	42.5
239.5	26.5	162				6.1	-0.8	6	29	87.4	-0.3
33.8	336.7	99.2				166.8	-6.8	37.8	2	3.1	-6
176.2	57.7	181.9				179.9	-8.9	5.5	-0.9	41.1	-12.4
184.6	84.2	357.6				47.3	-3.2	-2.6	-14.1	11.5	-4.2
171.7	69.2	75.8				128.6	7.4	51.8	21	59.2	-9.8
196	32.6	318.5				0	15.9	-4	8.5	44.5	7.1
283.1	277.2	413.2				-1.7	1	22.4	1	9.5	6.1
452.1	109.8	54.2				1.5	-2.3	6.5	-8	39.3	4.8
709.9	415.3	312.6				96.5	-3.8	28.5	-0.6	-1	13.1
383.2	213.4	123.9				155.8	-8.5	6.2	32.6	30.9	4.3
202.5	-19.3	201.2				239.3	8.5	-10	13.2	61.8	-4.8
237.9	77.8	278.2				126	1.2	-4.2	4.2	3.5	-0.2
327.5	101.4	-2.2				11.9	76	2.2	31.2	80.2	-1.5
314.3	14.2	191.6				49.5	-2.9	-1.9	60	15.5
464.5	-8.3	100.5				24.2	-6	-1.4	11.7	16.1
340.8	41.1	81.8				16.8	10.2	42.2	-4.2	95.3
-10.2	448.1	164.1				14.3	-8.8	6.3	2.5	-1.5
232.7	114.7	110.8				56.7	-6.8	69.5	18.8	8.5
335.7	173.6	347.8				1.4	-11.7	32.4	54	34.8
463.4	107.6	134.9				25.8	27	-1.1	-3.5	8.7
743	180.8	224.4				5.2	-1.8	-6.9	3.5	26.9
516.2	56.2	310.7				-4.8	13.8	21.5	7.7	3.5
127	120.2	234.7				13.1	5.1	3.7	64.9	85.2
157.8	97.6	54				140.2	2.7	52.6	245.6	65.9
-1.2	119.3	193.3				2.5	35.6	108.5	13.7	75.4
174.8	167.7	53.6				192.8	-22.8	51.2	38.1	59.3
-0.9	88.5	2.8				-3.4	33.4	10.2	41.9	-5
328.2	290.5	132.5				25.3	-8.8	64.2	4.6
227.2	183.2	255.3				28.2	0.7	-4.7	-6.6	13.7
177.7	-22.9	79.1				182.2	-6.2	-8.5	-12.8	8.9
267.4	244.5	146.8				-13.2	17	35.2	19.2	-2.8
193.2	185.5	152.3				20.2	84	1.9	-7.7	5.3
459.5	56.8	180.5				14.8	3.6	2.8	20.1	35.9
-3.1	38	128.9				-11.4	0.8	38.2	-5.1	-0.8
9.1	89	82.7				19.8	-1.3	42.7	-6.8	261.3
471.9	-2.1	222.8				9.5	0.5	148.8	6.8	9.5
498.8	112.9	73.8				23.3	-5.3	-4	-2.9	-7.2
490.5	277.7	239.8				-5.6	4.2	22.8	5.2	20.2
145.5	266.5	-1.7				3.3	2.2	66.8	19.4	22.8
323.2	695.1	70.7				2	-7.1	15.6	10.2	158.6
211.8	140.9	232.2				441.2	13.9	81.5	72	-4.5
-1.1	11.9	137.5				7.5	1	-6.3	10.2	229.1
39.7	131.2	237.2				3.7	-8.2	-6	1.2	42.7
0.8	184.6	1064.5				2.6	-1.5	-0.6	8.2	157.5
137.8	19.7	51.1				35.8	-0.2	8.9	-11.5	57.3
946.7	163.2	81.2				-1.5	0.3	0.5	-0.9	152.9
159.6	93.2	151.3				25.4	-1.2	-5.5	-9.8	12.3
217.2	177.9	184.6				-1.1	7.3	-0.4	15.6	15
441.5	250.2	803.7				-8.1	19.5	-3.8	4.1	23.6
346.6	59.1	267.5				240	-3.8	20.6	-5.5	59.5
452.1	278.7	-5.9				1.5	4.4	16.3	28.8	3.6
333.7	134	259.5				40.9	-1.1	5.4	18.8	41.8
376.8	75.5	132.7				67	4.5	4.7	-7	30.1
386.2	143.2	99.5				76.1	16.3	-5.7	-2.4	8.7
1501.4	100.7	4.5				29.5	-18.8	2.6	5	-9.2
596.3	-9.5	69.1				-0.8	11.4	18.8	12.7	207.1
321.5	99.8	100.6				504.8	-5.2	8.5	1.8	32
401.8	438.6	174.8				11.8	9.2	28.8	1.7
283.8	59	6.6				9.5	1.9	6.2	-4.4	195.7
445.1	275.2	195.2				1.7	-1.2	63.5	21.3	401.2
549.8	-5.7	86.5				16.8	-4.5	64.1	-3.8	426.8
445.9	446.2	358.4				1.2	2.2	32.2	12.4	-8
308.5	384.5	142.5				180.8	0.9	55.2	17.3	181.4
320.3	278.1	124.5				107.5	-11.7	7.3	1.5	12.5
160	156.6	-12.2				8	94.6	36.4	240.8	78.4
486.3	-6.5	90.2				13.2	-0.8	34.3	11.7	-10.7
147.8	61.5	66.8				16.8	-5.1	-4.3	28.9	3.7
268.5	12.5	-9				-2.4	13.2	2.9	8.5	332.2
409.1	-2.2	53.9				6.1	-13.5	-5.8	-1	305.1
364.7	162.1	65.1				20.1	64.2	64.9	-11.8	226
-63.3	114.5	51.3				10.1	-2.2	1.3	20.2	2.8
304.3	187.6	88				4.8	-3.5	-1.1	46.5	-12.2
-20.7	318.8	-6.5				234.2	7.6	-11.5	6.1	-17.4
-6.3	224.2	211.3				12.8	2.5	-3.8	45.9	19.7
247.2	145.2	70.5				-10.1	3.2	10.6	26	16.8
277.6	449.9	176.5				-3.2	1.7	-9.6	36.8	-2.7
433.1	206.4	1239.6				11.2	6	27.9	-3.2	245.8
251.2	115.4	152				4.5	-4.5	18.3	169.5	373.2
353.5	431.8	116.6				267.5	7.9	18.9	0.3	317.8
180.5	139.8	235.8				71	-5.1	-2.6	11.5	249.1
324.8	0.9	67.5				-2.8	-1.7	-4.2	2.8	8.5
572.4	27.5	270.2				1.1	16.5	5.1	7.5	-1.5
310.8	0.8	-2.5				-0.4	176.5	41.8	11.5	-10.8
-2.8	-11.6	448.5				12.9	0.4	5.2	-3.2	260.7
9.5	100.6	70				14.7	2.8	47.3	11.1	46.4
382	67.6	-1.4				1.9	1.1	-13.2	11.8	-12.5
255.3	148	981.8				-1.1	3.8	61.8	-4.5	-0.9
546.4	-23.7	628.5				6.6	-5.2	-1.1	6.6	10.2
8.8	475.4	224.1				-5.6	1.8	1.3	-3.5	196.6
554.9	174.2	176				4.4	2.6	6.5	2.1	-1.2
563.7	78.1	518.8				-3.9	2	0.5	20.5	516.5
339	-11.7	452				17.8	0.5	31.8	16.9	-2.2
181.1	21	103.2				-2.3	13.2	64.8	0	-8.6
335.8	104.5	245.7					4.4	24.2	-1.5
17.7	-22.2	-5.1				0	10.6	64.7	-6.1	11.6
370.5	169.7	49.3				27.3	-5.3	-5.2	8	-1.1
318.2	256.9	3.4				3.1	-8.8	2.9	-1.6	15
299.8	217.4	382.6				14.5	-1.1	24.1	-0.6	-4.3
413.4	-0.5	329.8				32.3	0.7	23.9	11.4	350.8
421.4	227.2	4.4				1.8	5.2	107.8	4.2	6.1
260	113.2	366.7				3.6	18.9	7.1	4.1	-33.5
335.8	215.4	711.3				13	-13	1.7	27.7	73.5
270.5	185.7	86.1				-3.4	-15.2	46.2	12.7	0
207.1	115	103.4				14.3	-4.5	3.3	16.8	79.3
203.3	247.2	845.6				3	-2.1	7	-0.5	-10.6
368.2	43.8	253.1				2.1	-3.8	23.3	7.5	-147.6
307.5	144.9	233.1				24.1	-2.6	30.2	-6	402.1
553.4	109.8	855.7				18.5	8.6	19.6	10.7	8
48.9	1030.6	242.4				2.9	5.1	3.5	48.7	-18.5
168.6	147.2	128.5				0.9	13	31.5	4.2	-5.8
421.1	58	345.1				2.2	1.5	70.8	-1.4	132.8
588.3	390.8	595.3				17.5		11	0.6	281.5
460.6	261.6	261.4				11.2	-6.5	21.5	4.3	9
135	208.9	436				-3.2	-2.2	13.5	49	-21.2
247	88	188.1				9.7	6.2	50.7	-8.2	-52.4
337.6	76.7	232.8				33.3	13.4	18.3	11.5	206.7
350.9	100.8	234				-5.1	-1.7	1.2	1.1	399.8
204.8	212.5	80.3				4.8	6.4	8.8	9.8	111.2
264.8	246.5	560.2				6.6	1.6	-8.8	1.4	-25
552.2	21.1	1014.5				-5.6	4.5	4.8	0.2	515.5
512	182.6	428.9				26.4	-0.2	30	50.8	36.9
202.2	-4.5	-10.8				-0.1	-0.1	16.7	10.1	209.6
603.3	9.4	599.2				22.5	-0.5	7	-2.3	-8.1
317.9	158.4	177				1.2	-2.5	-0.7	33.5	60.9
4.8	773	206.3				4.2	1.1	-6.5	25.7	3.9
18.8	473.3	97.8				12.5	7	8.1	-1.5	30.1
279	107.7	304				17.7	3	12.3	50.8	403.5
335.4	46.4	460.7				20.2	0.2	9.2	5.1	190
1.1	55.9	-136.3				32.5	-1.7	-2.6	-5.5	100.6
349.7	288.2	403.3				6.6	5.8	-5	19.7	-15.5
341.8	109.6	248.8				7	-8	5.4	42	616
8.1	81.1	188.3				-4.9	0.2	2.1	-10.1	-168.6
189	165.2	195				4.5	-8.4	-6.1	-2.6	317.5
237.4	-5	437.8				26.8	6.9	10.8	4.3	11.5
406.9	144.7	255.8				13.7	-4.5	4.5	-8	-9.8
437.1	21.8	370.2				24.1	3.8	64.4	12.8	576
-4.5	156.8	265.2				74.8	0	-12.8	-6.6	258.4
117.2	92.8	181.7				-4.5	9.2	-9.6	26.3	-4.1
680.5	505.7	1278.3				-4.4	3.5	80.7	36.8	226.4
275.6	163.7	108.6				38.4	-2.8	35.2	6.2	172.1
266.8	29.1	225.7				-2	-2.3	-4.7	11.9	248.4
597.2	8.6	67.2				2.4	-0.9	1.5	2	-82.7
339.6	552.8	257				12.1	0.8	0.5	52.6	-53.5
385.3	82.9	414.3				11.1	-3.4	-4.4	5.3	53.8
472.7	341.3	200.7				16.4	3.8	-10.6	-0.2	-83.9
498.5	-23.5	26.3				4.2	-12.1	20.6	21.2	2.6
309.7	296.5	160.2				41.8	-0.3	5.7	17.2	-0.6
300.2	233.8	287.4				12.6	-0.3	14	-2.2	-19.8
68.8	4.9	93.3				22.1	5.8	-8.8	5.2	1.3
24.4	542.8	175.5				25.2	7.5	138.5	8.9	19.5
262.2	225.8	136.9				17.1	-7.8	9.8	8.8	0.2
238.2	136.3	207.6				0.8	-7.8	47.3	37.7	13.1
1848.8	142.3	165				38.4	1.2	35.6	25.2	-1.3
362.3	226.7	165				12.6	-1.4	44.1	-1.4	-10.8
19.5	135.7	254.7				-3.8	-2.7	3.8	5.3	-3.8
85.3	318.8	103.9				18	-6.5	29.8	40.1	1.8
241	87.8	239.4				23.9	5.5	-2.9	3.4	-5.1
-13.1	183.5	523.2				6.8	5.3	-5.8	46	-1
0.5	100.1	92.5				-0.5	-0.7	11.8	-10.2	8.7
-11.1	213.7	145.5				-3.3	6.2	-7.6	17.7	2.1
312.8	-6.2	132.2				18.7	11.1	9.6	2.2	22.9
232.5	5.2	725.6				21.1	-4.2	-5.5	19.8	-4.5
213.7	133.7	143.6				30.8	0.8	-0.2	0.7	-6.1
-12.2	-3.6	170.5				13.3	-6.1	32.4	-5.6	-1.2
-9.8	114.3	175.7				13.9	5.5	5.4	18.5	103.2
7.3	430.2	-6.3				10.3	7.7	19.9	1.5	-1.2
420.4	245.8	156.3				26.2	7.1	4.8	32.8	0.6
125.2	308.8	119.2				16.8	-5.9	19.8	3.5	38
748.5	226.4	95.2				25.5	-13.5	60.2	0.2	-6.8
543.6	-10.5	127.8				3.9	0.2	1.7	7.7	11
0.1	215.7	205.4				2.1	-3.9	-2.1	33.2	-4.8
-4.2	38.6	158.5				1.2	1	25.8	6.9	0.7
678.2	186.2	111.8				-7.6	0.1	5.2	21	14.4
691.2	279.9	114.1				4.4	5.5	-7.4	12.1	-4.8
337	267	480.2				31.1	8.8	-16	27	1.5
306.8	573.9	241.8				18.5	7	68.1	45.7	33.5
-6.3	324.2	320.4				-5.7	5.8	-0.5	-0.1	-0.6
263.9	219	101				4.6	14.7	38.3	45	-0.8
352.8	310.3	529.2				7	-2.1	2.2	5.6	0.6
669.8	172.1	251.4				8.3	-6	3.1	3.2	-16.3
307.5	260.9	213.3				4.7	8.4	3	6.7	3.7
400.5	196.3	128.4				4.6	-4.4	3.3	6.9	0.7
489.8	183.7	456.5				1.8	-7.4	3.9	-1	-6
206.5	285.2	246.3				23.1	6.1	-1.8	60.8	-3.2
159.2	81.2	111.8				-5.1	1.4	7	18	20.4
335.6	293.2	315.9				23.6	-7.7	41	53.5	11
398.5	258.5	192.5				19.8	-4.2	7.3	-8.1	-8.3
670.6	280.1	405.3				23.1	-3	95.4	34	-10.2
262.5	398.4	199.8				15.1	-5.8	65.6	3	9.5
1134.2	269	473.2				7.4	3	-1.8	36.5	32.1
775.7	9.5	66.3				29.5	-6.5	47.4	55.6	3.2
-9	-4.5	114.4				17.9	-8.4	5.5	39.9	2.2
636	-1.4	56.5				11.6	-12	-0.7	17.8	6.8
163.5	91.5	167.5				3.5	-7	2.8	1.7	-0.2
425.8	508.9	191.1				39	0	1.8	-5.2	5.8
150.8	213.8	164.2				62.7	3.3	-3.9	1.1	2.3
537.6	-3.4	69.8				-3.1	6.2	9.8	20.5	1.9
290.7	9.2	274.7				30.5	9.6	15.2	10.8	28.8
284	3.8	102.2				6.1	3.1	-9.2	87	3.9
378.7	184.3	79.6				34.5	-10.1	-6.2	19.5	21
253.7	198.8	156.1				-4	-2.2	5.9	8.6	-3
110.5	161.2	266.5				23.2	2.2	0.3	10.7	-2.5
306.8	-21.2	1211.3				29.1	-10.8	-17.8	44.5	17.2
268	176.5	3				16	0.9	-1	-1.7	7.4
236.1	207.8	196.8				18.7	11	33.4	90.6	6.9
572.7	70.3	320.4				6.5	2.4	38.6	35.4	61.3
1029.3	17.4	146.8				-0.3	-8.8	2.5	20.8	12.2
41.2	7	-2.1				7.1	7.3	-6.2	63.3	14.2
533.5	136.6					23.1	-10.7	2.5	1	-1.1
-50.3	412.5	9.5				-1.8	6.2	37.8	19.5	4.8
260.5	167.2	5.2				57.7	7.9	4.3	36.2	1.4
723.6	90.6	57.2				18.5	4	0.2	6.2	1.5
768.7	281.3	1.5				1.2	6.2	-4.8	5.2	-3.2
-6.1	82	10.9				-2.5	3.4	5.1	26.3	4
0.5	298.9	-9.8				-6.6	-16.8	35.2	9.3	11.4
322	269.2	78.4				14.8	9.5	16.6	54.8	13.4
	23.2	127.3				1.4	8.1	15.7	-8.7	21
-6.7	104.5	0.2				35.2	11.6	32.4	45.5	5.5
11.2	282.3	286.5				8.8	-4.5	8.1	-3.8	21.8
21.5	-22	209.9				48.7	9.8	-0.5	-8.2
8.8	361.4	85.2				14.8	3	2.3	7.2
29.3	-7.2	196.6				0.3	9.9	-4.8	65.5
3.2	-1.4	86.3				2.9	-3	55.5	6.7
3.5	95.7	69.5				1.8	-0.2	17.7	7.2
17.2	-24.5	130.1				6.4	2.5	-5.9	31.9
10.5	255.8	12.6				2.8	1.5	51.2	6
-0.6	1.8	-7.6				7.1	8.9	-8.8	5.2
9.5	130.1	48.2				21.2	2.7	8.2	65.9
7.5	16.5	251.2				-2.8	4.2	-3.7	9.5
61	-5.4	110.6				-6	3.5	3	9.5
4.5	237.4	486.6				9.6	2.2	3.9	10.7
13.2	-10.7	109.2				6.2	-4.3	36.4	12.5
9.4	-13.5	111.4				5.4	10.2	3.1	9.9
4	6.7	141				0.5	6	66.8	8.9
15.7	184.4	217.5				-5.5	18	28.9	7.9
-1.5	108.2	83.5				14.4	-8.2	28.2	3.7
1.8	-2.5	132.4				-9.1	4.9	-2.4	8.5
48.9	-27.2	50.2				9.9	-8.7	-3.6	28
25.7	159.2	5.7				-5.1	6.4	8.1	-1
13.6	101.6	8.6				-8.3	-2.2	62.8	3.2
14.3	11.6	6.7				-13.5	25.1	5.7	21.4
10.1	-14.2	-0.8				0.4	9.5	46.5	-20.5
2.1	-3.9	-10.1				30	4.7	16.5	3.8
5.9	192.8	156.8				-4.3	0.1	22.6	2.8
2.2	2.2					40	-1.9	3.4	4.8
1.2	118.3					3.8	11.8	28.4	-3
24.9	-12.2					-6.7	4.5	0.2	29.8
-0.8	185.8					-3.8	18.1	5.5	4.5
-8.4	7.2					-10.8	8.8	1.5	-1.8
1.7	39.5					-6.5	-1	5.5	9.2
-9.5	468.3					-2.3	2.4	6.6	5.8
6.8	634.5					29.3	1.9	22.1	8.4
26.8	723.5					22.2	-7	-3	24.5
-3.4	2.3					-0.1	-0.2	-5.5	-1.8
1.1	94.8					8.5	3.5	-3.5	-3.2
3.8	-3.1					-4.7	-0.2	131.1	0.1
8.1	158					-3.1	3	52.2	24.8
32.7	3.8					5.2	2.1	-8.8	8.7
55.9	383.4					9.8	2.1	3.2	10.8
21.2	340.6					-12.9	10.5	-2.8	57.8
3.2	-114.2					-2.2	8.5	11.7	6.5
-3.4	8.8					2.8	3.7	1.5	1.2
19.4	407.7					-8.9	-2.3	14.1	5.6
2.4	-1.2					-6.5	1.2	99.2	1.5
34.1	18.8					8.8	1.7	1.9	4.6
9.8	-7.8					-13.2	-10.9	3.2	6.8
-3.3	339.3					3.1	-5.9	-5.5	37.3
4.8	236.5					2.4	11.2	67.5	1.8
1.2	153.1					8.2	-0.9	5.3	-2.7
11.7	253.8					-5.2	-5.7	-12	5.6
82.5	0.5					44.8	1.8	-1.6	26.2
5	-22					-0.7	12	25.5	1.5
0.2	-2.8					154.1	2.4	36.5	8.5
47.8	139.1					143.2	0.4	-0.1	2.3
4.1	30.6					-2.8	5.8	8	-9
17.3	80.9					-6.8	7.8	10.4	-7.5
22.7	17.8					-1.1	92.8	1.7	-2.2
4.7	321.1					24.1	4.2	1.5	5.2
6.7	13.7					-1.5	-5.7	2.2	11.2
19.2	33.2					2.4	-3.5	33.8	91
9.3	8.8					-0.5	3.4	63.1	-1.2
31.8						8.7	-30.6	45.6	8.8
27.1	1					2.8	-19.7	67.4	-1.1
7.5	6.4					17.5	-4	3.7	45.3
11.8	-3.1					12.2	9	-5.5	11.2
16.8	-6.8					0.7	59.8	162.8	11.3
16.9	22.5					-3.2	0	-8.8	56
16.5	15.2					27	-2.3	37.2	8.2
51.3	5.8					67	1.7	1	-0.5
38.9	6.1					10.3	1.1	56.2	-2.9
0	6.9					189.8	1.5	3.2	18.9
92.5	3.8					16	23.1	4.6	7.5
-5	0					12.5	7.2	2.2	23.8
33	17.2					-2.8	-7.2	2.3	29.2
-6.2	-5.9					179.9	1.7	23	42.3
12.5	7.2					153.4		3.9	-4.6
2.4	18.3					-7.9	0.5	4.7	-3.5
20.5	0.1					255	0.6	-1.6	6.6
12.9	13.5					-3.2	-8.9	1.8	20.9
33.8	8.8					2.4	1.3	11.1	-4.7
0.8	3.1					9.4	-6.5	-12.9	0.4
7.3	22.5					95.3	-2.5	2.2	3.3
25.9	0.3					180.5	2.8	20	17.1
36.5	6.5					-0.3	-0.8	-4.1	-3.2
27.5	-0.4					4.2	5.9	22.3	-2.7
15.3	-4.8					5.8	0.2	-5	-3.9
-3.6	1.8					-4.2	-2.5	27.5	-7
10.2	22.3					27.8	-6.5	7.5	2
25.5	39.5					5.8	9.9	6.2	-0.9
-1.3	12.1					-5.5	-1.1	-3.2	57.4
2.8	2.9					-8.1	0.1	-3.2	5.8
-7.2	1.9					-1.8	-1.1	14	6.5
1.7	33.3					-0.9	-0.1	34.2	0.8
-2.2	8.6					6.2	-5.5	2.2	2.5
13.1	11.1					0.5	-7.2	0.5	21.2
2.3	16.8					1.8	13.8	-5.5	4.8
36.3	15.7					92.8	16.4	12.3	33.6
87.4	34.2					172.2	3.3	1	22.8
8.1	3.5					-1.1	10.2	-0.5	3.3
25.5	-1.6					102.3	-9.2	46.3	-4.2
18	0.4					-0.6	36.6	1.9	-17.1
89.5	2.5					-0.2	11.4	1.3	-1.3
-0.5	-0.5					0.8	-6.9	-4	32.5
13.2	14.5					17.4	-2.8	23.4	-6.4
-5.2	-0.6					-5.2	3.2	-14.8	4.1
25.6	-0.9					-4.7	19.7	20.8	2.2
30.1	-11.5						9.2	40.2	8.2
5.6	-6.5					3	-11.3	55.2	156.2
8.8	-7.8					-15.5	7.6	8.8	193.8
-0.5	12					-3.8	68.9	0.2	-0.2
-8.4	1.3					4.5	-10.2	10.2	42.8
19.3	-3.4					0.3	0.5	1.5	37.1
0.5	-0.5					2.7	-10.5	5	-5.6
13.5	34.6					4.1	-10.2	4.3	0.8
-6.2	6.2					7.4	1.4	6.3	-12.2
-7.2	-8.1					11.5	7.9	-1.2	0.7
3.1	33.1					6.2	1	-4.7	4.8
-4.2	-6.9					-13.6	10.8	25.8	0
113.3	1.1					-0.6	-25	54.5	96.5
6.2	4.8					4.3	7.4	8.6	56.8
20.5	-2					4.9	0.5	14.2	126
3.8	-7.3					-1.6	-3.5	6.8	-0.3
9.6	-2.1					4.7	62.8	10.5	0.2
-6	1.8					2.2	-10.8	0.9	25.3
529.4	47.8					6.1	-6	-3.7	1.8
26.9	7.2					11.7	1.6	0.6	5.8
15.7	-1.2					6.8	1.3	-2.6	16.3
23.2	18					37.2	7	-3	11.2
3.9	23.8					25.6	68.8	27.3	5.6
17.3	13.1					8.9	7.6	-7.1	106
63.5	3					106.2	-12.1	4.5	84.2
53.5	18.2					29.7	6.5	-8.5	61.6
42	-8.5					-0.2	27.4	25.7	11.8
23.5	3.8					30.6	1.1	14.2	7.3
2.3	-6.3					18.7	22.5	20.8	-7.1
483	3.2					39.1	-1.8	6.2	18.5
8.2	1.1					26.8	-3.2	6.4	36.1
74.8	-1.2					0.6	2.5	62.3	-2.4
-1.6	11.8					-6.4	-5	3.4	4.4
42.5	-6.8					-5	13.7	1	0.2
22.2	1.7					49.5	10	16.1	13.6
37.4	81.3					-1	-4.3	-2.5	-0.7
-0.8	9.6					74.4	1.1	0.3	72.9
70.2	27					-14.8	82.5	25.2	28.2
183.6	26.8					-0.2	78.2	0.4	26.2
27.8	5.7					22	-4.8	-4.2	22.5
21.8	8.2					111.4	34.1	-5.7	0.9
30.8	17.3					6	1.1	28.2	23.1
42.7	0.1					-1.8	5.1	8.2	43.9
199.4	0.4					-11.3	8.5	8.2	14.3
20.7	6.8					-1.8	-2.1	-7.4	-4
17.2	4.2					8.1	12.1	-2.1	-3.1
-3.2	1.4					11.4	-0.2	12.6	77.2
14.7	2.2					1.5	8.2	3.6	35.3
39.4	-8.5					-6.2	-7.2	9.1	6
113.9	13.7					19.5	6.1	1.5	-4.9
212.7	28.6					59.2	1.3	-6.2	2.2
158.8	-1.3					111.9	7.5	4.9	38.7
149.2	4.5					129.8	-3.2	-5.8	53
26.9	-1.1					-10.4	-0.7	5.3	1.8
10.9	34					-9.2	-5.9	5	5.8
-9.4	2.8					164.4	-2.1	4.3	6.2
15.3	0.2					-1	2.8	11.4	-5.3
20.5	10.9					99.5	-4.3	2.2	-5.6
35.8	-7.6					2.7		17.6	9.3
-15.5	4.2					184.9		1.3	-1.8
5.4	4.7					156.8		1.2	2.1
13.5	19.6					-1.2		-0.6	-5.2
2.7	24.9					218.7		38.4	203.8
29	17.2					9.2		2.6	-4.5
27.5	-1.2					30.2		44.1	-2.4
164.1	32.5					64.7		-2.8	3.2
0.4	6.9					-4.5		-2	-3.8
22.3	1					38.3		36.3	15.8
8.2	0					39.3		9.6	12.2
25.8	3.8					-0.8		43.3	19.4
34.8	3					197.9		54.1	4.8
86.5	-1.6					94		71.2	-2.2
1	4.9					166.7		27.6	32.7
2	-0.5					22.8		82.2	1.3
14.1	-3.2					62.6		35.2	0.2
248.4	8.7					127.5		27.1	85.2
-4.2	4					19.9		4.8	3.4
31.9	4.1					91.3		13.2	33.3
77.2	56					53.7		-13.7	2.6
157.8	-1.1					48.4		8.8	41.5
29.9	32					98.9		57.7	0
12.5	-2.9					164.9		5.5	8.5
93.3	4.6					60.2		4.3	0.1
1.6	-6.5					24.4		8.7	-15.5
110.2	38.1					4.1		-11	0.7
3.8	-2.5					48.3		95.8	2.2
-0.2	-2.2					127.2		-1.8	6.9
34.6	-1.1					232.8		-2.3	96
42	-8.4					79.8		52.5	71.4
211.9	6					84.3		13.8	8.2
63.5	-4.2					94.8		-8.1	-1.4
104.2	-5.2					50.5		71.5	1.8
-1	-0.5					16.1		-14.2	3.8
10.5	129.2					4.9		-5	9.2
4.8	-1.1					33.8		-15	9.3
10.5	5.9					170.1		7.8	2.4
29.7	-2.9					-4.2		10.6	-2.3
-3.2	19.2					1.4		-5.8	-7.5
53.1	5.5					-2.9		3.2	5.8
38.2	34.8					-7.5		3.7	18.2
15.1	9.9					0.2		287
13	1.6					32		-0.2	0.3
6.6	-5					6.2		40.6	-5
54.2	0.2					30.8		-1.7	1.6
19.2	13.1					-2.4		-2.2	-1.2
29.5	2.2					2.5		3.2	6.8
43.6	3.1					142.8		4.1	5
67.5	23.5					61.8		0.5	3
39.9	72.2					8.6		78.3	0.5
4.9	22.8					7.5		34.8	10.1
4.5	30.5					14		7.8	-1.2
86.1	2.2					-2.2		-5.4	72.6
28.1	4.2					-2.9		20.6	-5.8
9.9	-3.7					1.8		7.5	52.8
4	21					14.2		56.2	-3.7
13.7	5.2					18.2		35.1	66.6
32.8	-9.5					-0.8		0.5	-4.3
-1.8	3.3							-0.5	-1.3
-0.8	3.9							122.2	7.9
0.6	-5.2							5.2	-1.8
12.5	-0.5							31.2	21.2
2.2	9.5							5.2	3
-9.2	2.8							-14.5	4.8
-4	27.5							-12.5	21.8
	-3.9							24.5	7.9
-6.5	3.4							19.7	59.2
287.8	27.3							-5.8	11.2
217	-2.6							67.5	1.1
1.9	4.2							103.9	33.6
315.8	34.5							4.2	1.5
245.8	89.2							-2	34.8
179.4	4.5							54.6	1.1
128.5	16.4							33.4	5.8
82.2	7.1							21.2	20.2
269.5	-6.2							-6.3	-6.2
376.2	22.3							155.5	178.8
6.5	-0.2							97.7	4.9
426.8	4.2							-20.7	2.5
541.4	85.5							2.4	0.1
-11.6	-2.2							-27.5	86.2
272.4	57.5							-6.8	-0.4
288.8	2.5							108.8	81.9
347.5	-7.2							106.4	19.8
323.5	4.8							46.1	104.8
274.2	109							1.8	-1.5
329.6	61.8							4.4	5.8
410.6	11.1							12.9	35.3
5.8	-6.5							131.5	18.7
462.8	98.2							107.5	-0.8
283.8	5.5							2.4	103.3
282.2	7.1							16.7	-1
422.7	14.3							3.7	46.8
-1.8	4.7							-4.3	22.6
-23	38.1							16.3	-10.3
-7.1	0.5							58.9	28.3
543.1	10.5							-2.4	35.8
514.4	-5.5							16.4	-14.9
590.3	211.3							20.5	18.5
406.2	37.8							23.2	-8.6
441.2	184.3							90.5	26.2
312	56.2							-16.4	-7.2
622.3	-1.4							47.7	31.2
395	54.8							-2.4	1.3
195.5	131.6							46.7	-3.9
198.7	58.8							12.7	19.5
433.1	28.1							-10.1	69.5
595.6	-3							-0.8	76.4
554.3	12.5							53.4	1.1
410.4	40.8							-4.6	74.3
214	15.5							8.6	5
493.3	-0.5							-1.1	26.8
576.8	7.2							-3.5	2.1
483.5	7.8							33.4	44.9
714.7	-4.1							64.3	113.8
461.5	117.7							11.1	13.6
609.6	5.5							13.8	128.4
319.2	0.8							-2.2	32.5
566.7	5.9							14.6	-2.4
399.8	1.5							18.2	40.8
-1.2	12.3							21.4	26.5
2.5	22.5							20.8	100
465.2	6.4							-4.8	-1.4
348.8	5.7							-2	160.3
431.1	-6.5							16.4	5
189.7	0							17.2	3.9
338.9	1.9							207.4	1.8
-0.2	24.5							0.3	45.2
-9.4	10.4							-0.5	2.6
670.5	12.1							16.7	95
324.5	-7.6							1.9	20.2
984.1	6.7							1.9	26
-2.8	7.3							-7.2	-0.9
274.6	14.2							-10.3	220.2
555.1	-4.3							6	-17.6
406.7	30							120.8	23.4
409.5	15.6							20.8	-4.8
848.7	-2							15.6	-3.8
372.5	2.9							4.6	73
596.6	-6.8							-2.5	36.7
478.2	-5.1							-1	7.2
630.8	-10.2							53.4	51.3
409.2	4.4							9.8	63.7
396.8	3.3							-2.7	13.5
-0.3	-3.9							28.9	2.7
348	3.8							14.4	5.4
287.5	-2.2							1.6	39
612.6	-5.5							34.2	-3.1
514.9	-3.2							-4.9	8.6
433.4	33.5							9.1	-0.5
319.5	54.5							36.8	122
511.5	2.5							15.2	4.4
329.2	2.5							-17	64.3
464.8	0.6							185	0.5
290.8	-0.2							-6.1	-3.7
1197.5	3.2							1.3	119.1
356.9								-5.6	23.2
279.2	4.5							46.9	68.1
346.3	-11.6							36.7	-14.1
321.1	-2.4							16.5	2.7
1032.6	-6.2							4.2
264.1	13.8							116.4	-0.7
-4.2	371.8							47.2	4
301.1	17.8							-0.2	1.4
539.8	417.7							30.9	33.5
347.8	3.3							42.6	13.6
374	-5.1							0.5	23.5
522.6	292.6							5.5	25.6
1.2	295.4							-12.9	26.4
272.6	163.8							57.2	0.3
-1.4	400.5							-11	20.8
-7.7	236.5							11.2	19.1
414.3	0.8							24.2	85.9
354.5	301.8							5.8	8.8
339.6	298.4							9.6	55.4
491.5	278							5.5	55.8
426.9	231.3							10.9	27.5
561.9	6.9							40.8	34.8
318.2	369.5							14.7	68.9
359.4	93.7							45.7	42.4
406.2	-7.6							5.3	5.5
473.7	-0.1							-3.7	59.5
684.3	761.2							0.6	62
0.6	253.2							1.6	23.8
7.1	345.6							11.5	38.5
388.8	299.3							-5.2	26.1
444.7	259.2							31.8	47.2
-5.8	149.1							9.4	4.3
9.8	-1.2							35.8	4.5
270.4	171.2							0.9	22.1
424.8	448.9							-5.8	34.3
30.6	351							230.7	71.8
618.9	8.7							-3.5	4.2
545.8	365.1							-33.3	2.7
34.5	119.1							-10.8	32.9
-1.4	325							-8.6	1.2
74.4	55.8							0.5	28.8
103.7	327.3							-2.2	30.2
139.5	146.6							15.7	55.5
329.8	341.8							13.4	25.7
490	175.4							25	5.5
387.3	302.5							13.7	26.5
112.7	1.1							5.6	31.2
382.5	846.5							-6	32.2
67.5	166.3							35	-5.1
180.5	422.4							40.4	22.6
379.3	79.4							7.9	15.8
1.2	-18.6							55.9	39.2
5.7	463.3							17.7	33.2
248.4	153.2							7.4	24.3
82.6	378							-6	6.3
8.3	-15.6							137.3	20.9
602.7	144.6							147.5	32.7
257.8	257.7							5.3	-0.8
-2.5	387.5							-6.8	44
106.8	383.2							10.5	7
0.8	6.5							151.9	12.1
-7.1	-0.3							41.8	17.1
211.6	250.5							15.2	15.2
12.3	289.2							31.6	89.8
3.4	281.2							-5.8	28.2
11.8	475.3							23.4	70
-4.2	304.6							49.3	35.3
-5.5	105.2							3.3	5.8
365.5	447.3							33.7	37.8
17.6	377.8							13.7	9
182.1	260.6							64.5	24.4
-5.7	1.3							-12.4	104.2
3.3	338.6							74.4	13.8
-9.4	-47.8							22.8	70.2
72.8	352.1							12.1	50.3
-2.2	257.2							14.4	22.1
122.9	4.5							15.6	0.3
79.2	467.5							-0.2	1.6
108.2	492.2							-0.9	-3.8
58	525.4							17	29.2
61.4	-3.5							62.8	40.3
44.2	8.1							128.1	6.5
61.1	-1.8							26.2	1.6
60.9	39.8							10.3	-10.9
9.8	-50.8							32	35.2
31.5	144.2							20.1	32.1
44.9	6.2							13.5	1.7
71	469.5							5.2	-2.5
15.9	312.7							51.5	6.6
10.5	438.6							38.8
34.6	213.8							-4.8	22.4
1.8	13.1							31.2	0.7
39	1.2							25.8	0.5
-2.8	216.9							-26.1	3.8
3.5	263.4							38.4	34.5
1.7	347.2							11.7	4
-4.4	229.8							-6.7	7
131.2	3							20.2	3.2
-7.4	557.5							56.4	83.1
28.2	273.5							9	1.3
69.9	0.7							-1.5	9.9
0.5	-4.2							37.6	-1.9
1.2	209.7							10.4	4.1
3.5	413.5							126.7	12.8
14.1	244.8							1.7	36.5
-5.6	-7.5							60.1	26.7
199.8	420.8							-3.5	13
5.6	353.6							0.5	13.5
-0.9	8.8							60	17.5
1.2	18.4							25.1	-1.8
4.5	322.4							-2.2	-4
210.2	234.2							7.1	-4.4
149.2	95.2							4.3	-6.7
52.6	-4.1							21.6	-1
18.8	10.1							10.1	0.2
31.3	157.5							11.8	2.2
68.1	192.2							0.2	4.9
1.5	202.1							1.9	-4.9
3.7	-12							4.3	19.8
61.7	250.8							3.2	-2.5
50.7	436.5							26.6	33.5
5.8	2.1							-1.8	1.2
-1.8	490.5							5.3	0.6
240.5	-3.5							233
-2.1	78.2							11.5	0.8
3.5	32.7							545.8	2.7
50.3	-9.6							-38.2	-1.6
53.8	167.3							111.1	-1.9
-7.2	203.2							29.8	1.5
142.6	334.7							31.3	4.9
59.6	59.3							30.5	-0.9
8.2	5.5							-1.2	3.9
-0.5	3.7							19.4	-1.8
66.3	91.2							-6.7	34.5
228.9	248.1							0.8	-6.8
-2.1	-2.4							4.8	-5
1.2	213							24.5	-1.2
98.8	83.2							6.1	-15.5
57.5	132.8							70.5	19.6
89.8	-8.1							69.8	2.3
441	-16.5							5.5	8
337.7	61.5							-0.7	33.2
-0.2	62.5							-8.8	-7.4
-6.2	235.1							18.7	-15.6
0.6	1.8							43.5	47
56.8	37.1							43.2	15.8
117.8	2.6							4.2	-0.5
237	1.3							7.7	43.2
72	42.7							23	-0.6
446.9	65.8							5.1	49.8
338.5	64.1							30.6	-4.2
7.7	0.4							3.8	28.5
7.7	4.3							5.6	13.7
429.1	26.5							68.3	-4.2
261.7	-6.1							209.9	1
334.1	8.2							23.2	8.6
8.1	28.3							-1.3	9.3
202.2	-2.1							48.5	10.8
298.1	10.8							-1.1	-7.7
-6.5	6							15.4	-2.6
8.6	-0.9							1.3	149.7
7.2	-0.6							-2	3.3
88.6	4.2							41	151.8
27.5	68.8							13.2	-2.8
203.9	-0.5							159.6	691.2
229.2	4.3							-9.2	117.3
1.8	-7.9							-1.5	3.5
35	5.8							313.2	12.3
142.7	5.9							-2.7	-2.9
93.2	24.9							21.9	44.2
3.5	36.2							16.2	2.1
16.4	67.4							3.8	0.7
106.5	35.5							2.5	-0.5
2.5	60.6							27.7	3.5
-2.2	91.5							21.8	-2.2
233.5	-13.2							8.1	14.2
-14.1	84.3							-5.3	251.8
176	-0.9							11.4	-0.3
62.2	8.4							56.2	17.6
-1.9	156.6							54.5	98.4
158.5	25.6							12.2	14.6
-1.9	84.9							21.2	-15.4
270.2	32.9							-10.5	-4.2
102.7	1							55.2	-7.2
196.7	108.1							11.9	5.8
6.6	116.3							7.2	23.8
287	7.7							-10.6	-0.3
169.8	-3.4							25.2	5
231.8	68.7							28.2	33.8
81.2	1.2							-0.9	0.8
7.8	-2.2							33.8	3.1
159.9	24							0.2	6.7
426.5	163.5							-2.5	2.8
418	55							1	5.7
115	-2.7							7.5	-6.5
-1.2	7.5							-6.8	0.7
83	3.2							-1.2	62.8
-9.2	-0.2							7.7
203.6	1.5							-3.8	8.5
111.8	87.9							20.5	-17.6
6.5	19.2							20.8	6.6
344.5	8.2							72.3	-7.5
79.6	16.6							-7	109.5
267.1	117.9							13.5	0.2
218.8	12.1							46.1	105.8
143.3	45.7							-3.4	2.4
-22	31.7							8.8	-51.4
283.2	3.6							54	7.8
173.3	5.5							90	354.7
10.5	9.3							20.3	-10.2
177.2	-0.2							467.1	31.1
2.5	-0.8							11	115.9
-4.6	88.6							5.8	160.6
182.2	111.3							66.5	-47.6
199.7	74.8							16.4	-0.5
287.7	4.8							9.1	9.4
547.1	-8.2							45.7
5.4	-3.7							39.5	130
89.7	-0.7							42.8	-6.2
-4.5	93.9							1.3	3.2
-9.2	11.1							-6.3	24.9
278.8	148.6							-11.6	6.6
80.8	6.2							-9.6	0.6
223.2	-3.5							136.5	29.4
475.5	170.3							23.8	-3.5
110.6	11.8							4.5	4.8
37.2	96.6							36.7	-0.7
272.9	-0.8							-8.5	-1
-16.2	156.5							19.8	9.8
24.5	-9.9							50.8	19.7
320.7	8.1							-2.1	29.4
137.8	14.1							1.8	33.8
372.7	-3.6							14.4	1.8
-13.2	37.4							84.7	36.4
9.2	16.8							14.2	-6.1
350.7	0.1							10.3	31.5
-0.8	-2.8							-5.6	2.5
301.2	2.2							0.7	41.7
4.2	96.2							15.8	4.8
7.5	157.7							44.3	3.8
162.5	72.5							-14	1.3
359.3	-2.6							0.8	16.9
-6	-7.3							3.3	-1
2.5	11.6							0.2	8
346.5	-1.3							124.8	31.7
344.4	-11.3							43.6	-0.1
39.2	-7.3							-5.9	77.2
329.2	56.3							-2.4	4.8
110.3	-12.8							242.8	-6.2
-9.8	4.5							22.8	1.1
795.9	60.2							5.3	69.2
164.3	130.7							34.8	18.5
63.8	0.5							35.1	20.4
342.5	36.8							8.6	-2.9
-13	200.4							-4.4	-4.2
-18.9	79.1							-1.6
184.4	57.8							52.9	47.5
242.6	5.4							60.2	-1.7
	-10.7							4.5	46.8
-4.8	-2							2.3	21.2
195.1	262.2							7.8	37.7
306.5	7.5							29.5	9.7
-12	235.2							-7.8	12.3
162.9	-5.5							221.2	175.4
-6.3	259.1							84.2	-1.7
7.2	-13							38.5	2.4
-6.5	172.5							33.5	2.2
659.3	3.5							1.6	-0.4
329.2	-4							28.9	-14.2
432.4	91							4.9	1.2
400.8	20.6							4.7	-1.8
269.1	98							22.7
457	-3.5							-1.8
11.8	-11.4							25.5
6.5	3.3							6.1
536.5	86.6							8.4
325.5	97.2							79
498.5	21.4							3.5
-5.4	-8.8							-3.1
340.3	-2.7							-2.3
333.8	-2.5							84
5	7.2							4.5
286	-3.5							6.9
384.2	7.9							395.6
360.8	22.3							10.6
-14.1	3.2							28.2
6.5	161.9							10.6
195.8	61.9							0.7
333.3	176							41.9
1.3	119.8							-12.3
-3.1	-11.4							4.8
513.8	58.8							23.9
257.9	260.2							11.8
12.8	385							-2.5
150.4	-0.2							11.7
383.5	9.2							-2.2
313.7	-4.5							-16.4
355.5	122.6							-9.8
331.2	-13.2							35.7
-1.8	2.2							1.2
405.7	149.9							24.7
411.2	283.9							3.7
5.5	96.5							4
219.5	124.9							16
504.7	77.8							0.2
466.5	472							2.5
481.8	226.2							28.2
277.9	281.8							30.1
268.9	412.2							0.7
205.8	168.4							208.2
-12.4	149.4							30.4
185.1	198.7							1.7
298.4	5.4							-12.9
389.2	233.6							-4.5
572	152							9.8
438.1	14.2							-9.3
378.6	152.8							-2.4
255.5	-1.6							-0.2
174.5	152.1							-0.2
428	92.9							62.8
422.3	-15.7							-20.2
40.3	5.8							275.2
322.6	-10.9							18.8
249	-9.4							0.9
325.8	198							0.8
541.8	249.8							2.5
168.8	167.7							1.7
124.7	-1.4							-7.5
465	-7.2							-8.2
2.9	98.8							235.8
459.3	127.9							-0.9
351.9	-9.8							32.8
224.2	0.7							-9.2
672.9	-0.2							18.9
276.8	178.1							8.4
307.5	103.2							-3.2
330.4	3.8							-4.1
484.8	178							20.5
1064.9	-11.5							-6
421.2	189.5							8.5
369.5	-1.5							240.6
507.1	2.7							-20.3
209.5	-11.9							12.6
148.8	-9							-4.1
426.8	16.8							14.6
262.6	-10.5							20.8
381.2	6.3							19.8
428.4	-1.2							-3.9
499.4	238.1							10.2
535.8	3.5							7.9
-10.8	96.1							21.4
474.2	61.6							3.6
234.2	73.2							-4.5
320.4	147.9							10.4
11.8	52.9							18.6
458.5	215.2							35.6
346.8	327.3							1.1
367.9	684.3							5
201.1	349.2							12.8
0	197.9							67.5
272.2	1.2							30.2
394.7	28.4							20.8
530.8	339.1							45.7
851.8	254							-6.6
1115	-13.1							6.4
299.2	169.1							-0.8
695.6	4.7							31.1
581.8	198.7							34.2
203.3	123.3							-1.2
274.2	-11.1							-0.5
546.6	245							44.6
420.1	-26.7							33.3
419.2	227.5							62.5
-13.1	4.2							18.1
728.6	29.4							3.2
458.1	-10.9							-4
682.5	-0.2							-16.2
501.8	-19.8							14.5
393.2	5.2							3.8
306.3	93.5							-0.5
450.2	230.2							45.7
383.7	56.8							7.3
-4.2	11.5							-1.2
1.5	188							-1.9
48.7	230.5							25.7
242.9	-5							-5.4
415.2	6.2							12.7
	6.8							26.5
7.2	-49.7							3.9
6.4	3.8							13.1
-2.8	203.2							37.3
0	-11.6							36.7
11.5	2.8							4.5
-1.3	0.1							0.8
2.9	8							17.1
105.8	4.5							-2.6
11.1	-1.6							-2.2
5.4								-2.2
0.2	5.5							-1.8
-4.8	-2.9							30.4
-16.8	1.5							23.7
2.7	11.4							-2.3
105.3	250.1							4.9
16.8	244.8							3.7
-11.7	242.8							16.2
98.4	435.8							-8.5
-22.2	-0.4							28.2
129.9	-30.9							1.2
-1.5	205.4							19.1
-13.9	443.8							18.9
9.2	105.1							8.3
78.1	-21.5							8.2
-5.5	-11.2							3.9
-9.3	264.5							-11.8
119.9	149.5							16.5
173.8	242.6							5.1
220.2	247.6							57.8
66.3	-2.3							19.5
48.3	153.8							18.6
168.5	92.8							0.8
33.7	147.1							27
-11.7	-10.2							6
15	85.2							19.2
81.5	288.9							5.8
97.8	-11.5							-5.3
136.6	355.4							-5.8
38.2	-9.7							-2.2
77.3	280.6							3.8
35.9	6							62.8
87.3	87.8							3.9
32.8	-7.9							-4.3
114.8	242.8							30.1
-18.3	121.2							28.7
143.6	130.2							-6.5
83.5	87.6							-0.3
67.7	232.4							21.1
-2.1	155.3							5.7
40.5	331.2							6.8
104.2	4.2							3.5
62.2	-1.5							-3.2
329.5	338.2							5.8
54.1	2.4							2.5
0.3	286.5							-2.2
864.2	-0.1							5.4
28.7	-0.1							3
142.8	-12.2							38.2
38.2	99.6							-20.1
99.2	300.3							60.2
5.1	52.3							36.8
-0.5	3.1							12.9
546.2	-1							1.2
48.6	163.7							-3.5
237.6	528.5							10.7
16.2	109							48.2
655.8	147.8							47.6
-15.4	133.8							17.2
76	106.3							5.8
11.2	31.4							5.9
56.5	154.4							-8.4
104.6	158.4							41.7
159.2	125.8							23.5
95.8	356.6							7.9
18.5	145.2							7
63.2	288.8							31.7
3.4	215.4							14.8
113.6	251.3							-7.3
79.3	342.2							2.9
124.5	201.9							1.3
1.7	7.3							3.2
58.2	-9.6							27.7
4.9	157.7							3.5
39.8	116.6							33.5
54.6	347.8							30.9
40.2	-4.9							29.8
44.2	13.5							-3.7
3.6	243.7							-4
2.8	192.2							3.3
77.7	89.3							-4.3
193.9	130.2							-1.7
116.7	345.5							12
169.3	945.2							-6.6
96.2	149.5							0.8
63.4	188.3							16.1
-0.5	231.5							12.3
-18.2	59.2							-4.8
4.5	209.3							2.3
1.9	411.8							3
76.8	7.8							9.1
48.8	285.5							-2.6
85.8	361.8							-2
73.6	3.6							-13.7
70.2	187.2							-3.1
5.2	309.1							6.7
33.6	273.8							-13.5
-10.1	174.1							25.7
39.2	8.6							10.5
89.2	107.5							-5.8
41.8	-1.8							10.2
6.9	152.2							-13.3
-5.6	94.1							32.1
-5.7	291.8							0.6
71.6	195.2							5.2
81.7	180.8							-9.2
70.9	277.1							3.4
-1.5	296.8							8.9
0.8	367.5							-5.7
6.4	120.5							-2.2
-5.9	420.6							16.2
-2.3	-7.8							-2.5
3	234.3							0.8
81.8	182.5							21.9
455.6	353.4							3.3
62.5	225.1							-6.6
54	391.3							0.5
128.5	187.2							20.1
172	0.1							1.8
1.2	383.8							19.3
-8.7	402.5							-4.3
-4.6	215.8							13.4
-9.8	190.5							2
-9.8	-3							9.5
110.6	238.3							70.8
465.2	11.2							32.2
12.2	497.3							2.5
-0.8	290.5							-2.9
24.8	-6.9							5.4
175.7	375.9							20.1
55.8	159.6							13.8
234.5	56.4							-7.6
-29.1	318							22.8
58.8	110.6							-2
5.8	4.2							5.5
5.3								-5.2
105.2	7.4							2.2
54.1	-16.9							22
209.4	4.4							15.5
159.2	4.6							60.8
88	7							22.2
-6.4	5.2							3.7
173	3							6.2
-3.1	-4.1							56.8
368.8	-1							19.6
120.2	13.6							2.3
5.6	0.4							8.9
105.7	1.1							0.4
2.1	-0.5							9.7
92.8	-0.9							-1.1
328	10.8							54.7
199.4	4.5							-0.5
39.5	-7.6							18.7
39.8	6.2							21
-0.2	-1.1							8.9
95.6	-8.6							-6.8
-2.6	-13.2							48.1
61.8	-16.2							27.8
-95.6	177.2							6.1
85.5	12							12.4
9.2	4.5							4
82.2	1.4							3.8
50.4	-18.5							55.9
1224.6	-10.8							31.6
94.3	-1							36.1
69.9	8.5							4.8
135.3	28.5							7.2
78.8	88.2							31.6
49	231.9							28.3
115.8	103.1							0.8
91.2	2.8							12.8
93.7	57.8							8.1
-16.5	3.5							9.5
[truncated: 2,691 more rows]
