# Supplementary material for: Tight nanoscale clustering of Fcγ receptors using DNA origami promotes phagocytosis
Source: eLife. 2021 Jun 3;10:e68311. doi: 10.7554/eLife.68311 (PMC8175083; doi:10.7554/eLife.68311)
Supplement: Figure 2—source data 1. [file elife-68311-fig2-data1.xlsx]

## Sheet: Receptor-Repeat 1
Intensity at 72-ligand origami (co-plated with 36-ligand origami	Intensity at 36-ligand origami	Intensity at 72-ligand origami (co-plated with 16-ligand origami	Intensity at 16-ligand origami	Intensity at 72-ligand origami (co-plated with 8-ligand origami	Intensity at 8-ligand origami	Intensity at 72-ligand origami (co-plated with 4-ligand origami	Intensity at 4-ligand origami	Intensity at 72-ligand origami (co-plated with 2-ligand origami	Intensity at 2-ligand origami	Intensity at 72-ligand origami (co-plated with 0-ligand origami	Intensity at 0-ligand origami
680	-30.5	0.1	-8.3	39.8	2	4.9	2.1	-3.6	-2.2	70.4	15.4
-43.2	304.2	176	-6	78.7	-4.7	11.6	26	148.5	0.3	19.9	139.7
28.1	226.5	10.2	-2	99.2	12.7	143.2	1.5	69	1.3	0.7	6.7
549.8	349.8	-13.2	-19.1	273.9	4.3	60.8	3.8	-9.8	-6.8	38.5	-2.1
694.2	237	301.8	-14.1	119.5	235.2	-1.4	-1.4	-7.5	30.5	217.1	-2.7
640.4	245.2	-9.5	401.2	0	-3	164.5	20.5	141.5	-5.9	66.1	5.3
485.6	321.6	112.5	-14.2	89.5	-0.4	2.5	5.1	13.6	-0.3	50.9	3.1
-17.3	314.4	532.1	-7.7	22.8	4.3	139	1	3.1	-3.5	231.4	4.7
447.1	5.4	1157.4	6.5	-0.7	67.3	44.9	-3.5	-3	-2.7	66.6	-0.2
459.4	-7.1	267.2	14.1	57.2	53.5	4.7	10	59.5	-0.3	65.4	0.1
406.3	224	1.6	92.8	7.6	-1.6	114.8	0.2	65.1	-4.2	-5.2	-4.6
760.2	343.1	141.4	-34.4	66.9	16.7	148.8	-0.9	11.9	1.8	91.1	22.6
76.5	432.8	333.3	57.6	66.2	35.7	90.2	235.3	75.4	6.4	217.5	26.7
3.2	35.5	449.9	-42.9	54.5	31.7	54.6	-6.2	-3.2	-2.2	92.4	6.9
2.5	403.2	26.1	4	81.6	-10.4	324	344.4	232.5	2.3	108.4	11.7
3	6.8	753.2	-78.9	101.4	-3.9	77.9		102.3	10	87.4	63.2
655.5	32.7	164.2	229.9	49.9	-0.2	160.5	0.3	6	-6.5	58	0.2
627.2	258.3	118.7	-101	186.5	-0.9	255.5	-0.1	4.2	6.5	100.6	12
546.5	308.2	260.9	-310.5	18.7	-3	2.2	-0.3	-3.5	2.1	249.2	-0.7
363.5	181.2	-72	67.9	-15	3.2	0.2	3.1	2.8	-2.4	28.6	7.7
471.6	95.5	96.5	-177.8	4		114.8	27.3	93.8	2.7	118.8
171.7	157.2	296.8	-54.3	-7.6	2.4	94.2	-1.2	1.5	-3	50.3	0
588.9	379.5	591.1	-11.5	155.3	1.3	7.2	-1	8.2	-14.2		3
238.8	-6.8	1057.4	10.7	26.6	-2.5	62.8	2.2	4.5	4.9	-0.1	-2.1
373.2	149.5	206.2	151.2	-12.9	-21.9		9.4	216.1	0.4	2.2	28.8
642.6	210.8	193.2	-18.2	3.8	48.5	62.1	-0.3	139	0.2	-1.8	-2.4
486.1	278.7	197.8	96.4	-4.5	82.8	0.5	0.8	-1.1	3.6	4.4	4
-6.5	339.8	432.4	907.3	61.2	48.8	-3.8	-0.3	74	-0.4	1.6	-1.7
373.4	245.4	503	135.5	101.9	7.3	233.8	14.2	159.6	-11.8	126.6	10
-30.2	309.5	326.4	-367.9	22.1	177.2	182.4	-6.8	61.5	12.2	141.6	0.7
347.6	-9.8	610.7	487.5	140.6	76.1	69.1	2.7	67.4	38.7	-1	3.7
449.2	210.5	439.8	44.7	3.9	35.8	191	0.1	31.8	9.7	-2.4	68.6
511.2	289.3	896.2	-9.5		284.8	1.5	8.2	100.8	-21.7	230.2	-0.9
522.8	218.7	218.4	140.6	350.3	-3.9	8.3	-0.5	89.2	1.6	5.5	-0.8
459.2	207.8	120.8	-180.2	81.4	1.2	184.7	-2.6	55.7	58.7	139.8	0.8
410.8	268.5	130.3	132.8	169	-7.2	129.9	42.7	58.9	-7.1	408.1	0.2
-6.7	384	366.2	172	199.3	-7.4	295.7	40.1	3.8	72.9	161.2	7.2
616.2	194.8	226.6	518.3	237.4	4.1	115	3.9	-5	-25.9	181.5	0.5
6.8	18	992.6	21.3	77.5	25	407.1	-1.7	73.2	-2.5	117.5	-1.9
184.8	229.8	157	-25.3	311.5		183.8	-0.8	109.7	-15.7	186.8	-0.7
323.5	729.3	217.8	-62.8	184.6	42.8	158.4	118.4	73.9	4.6	116.6	-0.1
478.8	286.5	514.4	245.3	236.7	-3.6	41.5	-6.6	48.5	4	117.5	-0.4
492.2	162.6	215.5	1.5	240.1	-3.8	-5.7	19.3	117.4	0.2	-3.5	-3.3
14.1	294.7	422.6	-46.8	253.4	108.5	-1.6	13.7	103.5	-5	164.8	17.3
322.8	-1.4	378.1	187.2	200.2	92.2	189.9	-19.2	1.8	1.4	1.9	-4.1
9.5	230.7	80.4	353.3	409.3	43.3	36	7	49.1	11.4	124.2	4.6
-2.2	303.5	112.2	-153.8	5.8	-7.5	-3.5	95.8	2.9	9.6	122.5	-0.3
482.8	48.3	280.2	39.5	107.8	21.6	132.3	-16.7	104.5	68.3	84.5	70.9
-5.7	155.7	57.5	21.8	182.2	1.9	244	6.8	2	9.7	1.6	0.8
-1.4	168.8	218.5	-96.9	-17.5	-3.7	192.6	51.6	1.2	-0.2	243.9	40.1
19.3	1.5	12.4	278.7	173.5	-3.3	27.5	15.8	-3.9	13.4	0.6	0
385.9	0.2	-21.5	-95.5	206.9	5.9	0.2	0	38.8	27.5	157.9	-6.9
-1.8	300.2	125.2	-34.6	6.1	4.5	-14	44.1	93.8	-2.7	153.3	0.1
9.5	299.8	292.8	228.9	287.3	-6.2	219.5	7.6	78.2	-9.1	161.2	1.4
395.6	0.8	199.2	-239.9	2.4		135.5	26.1	83.9	2.2	164.6	1
-8.2	213.5	-33.4	158.7	105.8	35.2	-8.8	5.2	182.2	0.9	156.5	-3.7
394.1	212.1	-11.8	44.4		0.9	144.7	-0.5	183.8	5.7	129.2	28.9
0.6	267.8	420.5	-1.8	230.8	-1.3	5.2	9.9	60.3	2.2	131.3	-1.6
487.8	350.6	235.5	423.6	142.8	-0.2	97.7	-0.2	-5.8	-3.1	77.9	-1.7
620.5	311.7	200.3	-8	79.3	0.6	2.2	10.9	117.9	0.4	285.1	2.5
335	278.5	500.9	473.8	136.5	93.5	142.8	-1.5	92.4	5.2	-3.3	-1.7
411.3	0.7	-8.2	368.4	-7.5	73.4	261.3	-8.8	109.2	-1.2	148.4	-0.5
483.4	-4.6	19.7	130.7	125.9	26.9	9.5	-8.3	-1		223.6	3
	-30.8	225.8	77.2	243.5	35.4	81.5	31.5	77.5	0.1	256.9	-1.2
-4.7	42.3		163.2	171.8	-9	96.8	13.8	42.2	1.1	198.5	1.3
69.1	170.9	85.9	327.7	105.2	7.2	62.9	-20.7	0.5	-2	136.5	3.1
108.7	457.2	163.3	-62.5	56.2	0.9	37.2	22.1	57.2	2.2	-8.4	1.2
340.6	116.8	18.2	-3.8	126.8	-0.7	146.1	18.2	52.2	-2.3	86.8	2
-4.5	-3.2	87.2	85.5	56.8	1.4	94.2	-5.1	-0.3	46.9	53	7
-4.5	86.5	108.4	169.8	153.7	1.9	-2.5	-4.8	49.7	93.7	1.5	28.1
	0	126.9	-516.8	113	0.4	40.4	-1.4	69.6	1.3	83.5	2.4
548.2	195.9	92.2	-28.1		-5.2	101.5	4.1	-10	25	34.5	39.3
-32.3	-16.5	24.3	-28.4	195.1	1.9	-3.3	-1.5	105.6	27.1	181.7	6
-96.5	44.1	33.5	-6.5	134	-3.6	85.6	0.3	-3	4.6	201.1	-0.2
-3.5	0	31.3	86.8	67.5		69.8	37	165.8	69	-3.6	1.5
-3.2	6	218.5	-91.1	115.7	8.7		0.1	74.3	7	0.5	-0.5
732.7	38.8	83.8	-0.5	-2.8	10.2	188.3	-3.8	66.5	-2.8	48.3	-0.1
16.9	-36.7	-3.2	-26.6	2.4	-23.8	189.1	35	195	31	91.1	2.9
511.5	-5	124	-34.8	-4.7	111.9	141.2	-1.1	0.4		28.3	3.2
470.8	178	28.2	192.2	95.8	132.5	175.7	10.2	114.3	3.9	139.2	-3.9
447.4	95.7	74	-6.5	206.3	12	161.1	6.9		2.3	101.8	-1
386.2	7.5	194.5	-73.2	127	-61.4	0.6	1.3	236.4	-3.4	41.6	0.7
344.9	50.5	117.5	253.4	103.2	14.2	120.5	-4.5	122.5	2.5	45.5	-2.8
627.5	-2.4	104.2	-114.6	52.3	110.5	36	55.3	196.2	-2.7	78.8	2
119	5.2	77.9	83.5	123.3	-1.7	269.3	-2	272.5	-1	50.3	1.7
1.8	-11.1	82.9	240.2	55.7	6	92.7		-2.8	3.4	106.3	-0.7
-5.3	-24.9	79.1	72.8	131.5	130.8	67.7	-1	169.2	2.9	86.5
412.3	79.6	2.6	4.1	89.6	-25.7	96.7	-0.1	272.6	-2.8	38.3	-0.8
503.5	122.6	86.2	163.1	-1.2	40.6	4.3	-2.7	21.4	-2.3	5.5	3.4
375.8	37.9	89.4	-0.8	-5.5	-27.1	108.3	1.5	410.4	7.5	243.5	-4.7
498.8	95.6	91	-4		70.1	138.2	48.5	167.7	1.5	107.6	-2.6
245.7	-1.2	89	217.2	120.4	-13.1		-0.2	62.8	-4.2	-1.5	8.6
135.8	101.6	204.2	11	-8.1	-11.8	99.8	-4.8	288.5	3.4	6.4	-4.9
610.2	-29.2	147.5	22.5	-4.1	-4.8	3.8	7.7	167.9	-1	18.8	13.3
181.8	-2.6	129.7	-7.8	-53.3	44.1	161	17.5	168.5	4	1.1	2.5
372.8	196.9	160	0	157.5	69.8	-2.2	-0.7	283.2	-2.8	-1.5	2.4
486	69.1		134.9	-12	-51.2	-0.9	-0.8	361.5	-8.4		-4
543.2	147.5	95.2	24.1	199.1	-4.8	117.5	-1.8	4.5	20.6	1.1
279.8	67.8	45.8	50.8	-35.2	-31.1	3.1	2.2	222.8	-1.2	67.9	1.6
-34.2	60.6	99.2	2.4	152.2	-27.6	-16.3		170.8	-2.6	1.9	-3.5
271.8	104.1	68.9	-1.2	24.7	40.4	87	23.3	-15.1	-4.7	8.5	-4.4
461.2	151.7	109.3	-4.8	-6.8	-13.7	111.8	2.1	223.5	-4.8	0.8	0.6
549.3	-0.5	82.8	0.2	128.2	-8.9	111.2	-2.2	47.3	2	134.5	19.4
457.5	82.2	105.9	-1.2	131.8	-86	105.2	-0.7		-0.5	-1.7	-2.1
375.4	30	68.6	8.9	187.1	52.7	157.1	0.9	0.9	-1.5	1.8	2.2
385.2	42.8	4.4	-30.8	-22.9	-36.2	15	1	55.2	170	44.6	1.4
637.2	186.4	86.8	-3	143.1	83.8	187.1	1.1	230.1	4.5	-0.5	1.9
-22.3	206.8	-9.9	-4.9	137.2	32.2	74.7	-1.3	83.2	53.4	70.9	-1.4
263	70.7	329.6	-8.7	71.8	-13.1	-3.8	0.7	-3	106.7	94.8	-1.5
424.5	1.8	180	16.9	389.8	25.1	116.5	-3.5	196.5	-13.7	85.7	-1.5
494.2	128.4	54.2	33.7	125	-4.6	143.5	-5	22.5	40.2	175.7	-2.7
	100.9	108.9	2.2	-62.9	74.4	155.4	5	173.4	2.5	52.6	1
329.8	511.1	116.3	14.3	137.6	1.9	0.1	-3.4	140.5	7.9	23.5	5.3
-4.7	63.2	145.2	-6.9	264.2	-15.7	152.6	1.8	70.2	88.8	29.8	-0.2
-22.5	15.9	85.2	14.5	91.9	31.8	128.2	-5.2	160.5	-0.7	167.8	8.1
-3.7	90.5	151.5	15.3	107.7	31.6	42.8	0.6	181.5	4.5	148.5	1.5
400.9	72.5	48.8	32.7	339.1	-62.5	145.8	2.9	0.6	-3.9	126.9	-3.4
-19.9	7.9	142.5	48.3	334.4	100.8	134.4	2	52.6	0.4	173.8	-3.3
16.5	8.3	96.8	1.2	264.7	-17.1	131.1	1.4	-0.6	-42	115.8	0.7
369.8	360	148.9	-4.2	54.2	71.6	108.5	4.8	155.5	-2.9	67.8	-0.3
-13.2	37.7	129	-10.1	217.5	-7.3	4.6	0	1.8	-1.3	32.6	-0.8
309.7	75.8	99.6	-1.1	61.1	17.8	113.7	0.1	0.3	-2.5	48.7	-0.4
1.1	131.4	56.6	7.2	254.5	24.2	89	13.2	168.3	-2.4	93	0.9
495.8	225.5	83.6	-8.1	273.5	-8.5	-5.8	-1.2	26.2	-6	323.7	-0.5
677.5	62.6	163	-1.6	296.7	13.6	92.9	-3.4	104.9	-1.5	90.9
421.3	103.8	104.1	6.2	224.3	-13.8	211.4	124.2	8.4	-1.2	257.7	1.5
392	227.4	51.5	-11.2	190.8	-4.7	1.8	0.6	90.9		68.2	4.4
486.4	140	81.9	34.7	67.2	3.2	110.5	-24.7	108.8	9.1	25.1	-2.3
	158.9	226.5	11.8	0.2	15	0.8	-1.7	95.2	-5.3	44.3	3.8
26.3	199.2	97.8	61.8	269.2	-33.6	111.6	101.2	124.5	16.1	66.9	52.6
4.2	22.2	1047.4	25.7	126.1	-44.4	58.2	-9.7	67.8	5.6	-2.1	-0.9
0.3	-8.1	326	11	103.5	20.6	127.7	10.7	237.8	3.6	39.7	-2.5
-17.3	9.2	64.9	0	-34.9	-31.9	91.6	2.8	73.9	4.2	36.7	7.7
66.4	-5	-0.7	-0.4	115.5	-48.5	-1.8	2.1	-3.5		69	0.1
199.8	322.7	200	1.4	19.3	38.4	5.5	-1.8	108.8	1.5	91.6	73.6
19.4	50.2	73.8	3.2	-14.4	193	-1.3	2.4	158.2	-6	191.5	0.8
177	2.1	5.4	-10.2	121.8	114.7	4.8	1.7	110.2	26.4	135.1	-8.8
229.9	67.3	0	-9.4	166.9	36.6	49.6	3.7	187.1	2.1	14.1	12.9
69.4	0	156.4	-0.1	-2.4	207	34.8	-2	217.2	-7.4	151.5	7.3
-4.2	-8.1	112.4	-3.9	239.3	150.4	32.5	25.4	129.2	60.4	297.7	-0.3
225.9	57.8	121.4	-1.7	98.6	15	41.1		103.2	-0.6	90.7	-0.2
295.9	14.5	113.6	7.9	86	-7.6	3.9	-0.7	182.8	11.8	30.9	0.9
288.5	-5.4	93.7	18.1	154.6	77.5	58.5	2.2	117.9	-0.2	185.1	2.5
107.2	39.8	-7.5	4	-46.6	-23.2	143.5	0.7	246.7	-0.2	42.2	-0.7
323.5	24.8	144.9	21.1	238.7	39.6	6.6	5.6	173.7	-3	0.6	-3.2
285.3	197.3	88.5	4	199.8	-44.3	23.5	0	378.2		56	-1.1
176.8	22.5	192.1	-1.2	6.4	38.8	1.2	0.9	-3.1	2.3	1.7	2.1
129.8	38.2	56.4	-66.4	123.9	212.6	41.5	-3.2	177.1	0.2	139.9	-3.9
3.1	1	99.8	4	83.2	21.9		4.8	262.5	-3.2	198.5	1.3
-1.5	0	59.4	-2.4	-19	117.3	49.4	3.9	142.9	3.1	1.1	1.5
	73.5		8.7	107.2	157.9	44.5	-4.1	34.3	38.1	271.2
-4.2	-10.9	1.7	123.5	175.9	-28.6	59.4	1.5	196.2	0.7	68.9	11.9
-3.2	473.6	-3.9	6.7	-11.7	-2.1	27.2	-2.1	1.5	1.3	-7.9	7
641.4	269.3	176	22.4	54.8	-8.5	43.6	11.3	67.3	0.2	65	16
7.1	198.2	77.4	-138.3	71.7	-18	68.7	-9.5	217.2	1.3	148.5	-5.6
330.3	425.1	214.6	-1.6	146.9	-19.3	38.2	5.7	215	1.6	2.5	3.4
658.7	141.5	96.3	-3.4	107.2	71.3	44.2	-1	110.2	-0.3	-1.3	-1.7
310.5	-7.9	202.8	-14	238.3	-31.7	85.7	1	0.8	-2.5	48.8	73.4
453.8	-10.9	152.8	8.6	53.1	14.5	65.7	92.8	231	3.6	5.5	3.6
364	-23.6	191.3	99.7	247	-2	95.7	1.2	104.6	-3.6		2.3
456.5	-11.5	159.6	-14.8	319.4	62.1	72.2	-5.7	189.9	-2.1	0.1
272.6	172.4	163.7	13.9	-36.7	36.7	44.9		228.2	15.9	-1.3	-1.2
402	74.6	325.8	-8	201.2	-59.8	61.2	45.6	80.4	1	-2.8	3.2
262.3	0	95.5	-17.5	94	-65.4	119.2	0.2	34.3	-5	42.9	48.2
318.7	102.1	126.1	-27.5	273.8	62.1	51.4	-1.9	0.4	-0.4	-1.9	4.1
-51.8	145.4	91.7	-39.4	130	7	24.4	2.8	178.8	2.5	2.1	-2.3
76.6	65.1	49.1	8.8	248.3	-44.8	4.9	0.3	-3.7	4.3	98.5	19.2
309.2	0.9	75.3	4.5	121.1	-34.5	53.4	-1.2	4.5	31.5	32.1	1.1
27.1	54.5	-2	39.3	197.3	206.7	79.7	0.3	0.6	2.1	0.6	9.7
498.1	-3.4	83	23.2	172.2	63.3	35.9	1.6		9.3	68.8	25.3
289.5	0	102.5	-125.1	241.6	12.7	55.3	-3.3	83.8	0.9	55.4	18.6
104.2	-0.8	169.8	2.6	71			-0.1	111.2	3.4	49.7	-4.6
-0.7	154	304.6	21.4	221.7	0.2	76.7	42.4	46.6	2	76.8	-10.1
	-21.3	117.6	-0.5	140.5	-4.4	-1.1	-0.4	89.5	-3.2	36.7	2.8
186.7	162.9	463.9	59.1	135.9	-2.2	3.1	-1.9	138.6	0.6	63.2	52.2
182.2	224.9	97.4	371.2	107.8	-4.5	1.8	-3.6	110.4	0	-0.5	32.5
201.2	51.5	135.7	138.5	209.5	2.7	-0.2	-2	106.8	2.1	0.4	-16.4
-3	0	18.5	48.1	204.6	0.9	0.5	2.1	161.3	3	-1	-3.6
331.6	9	-3.8	-0.2	134.6	1	-0.2	4.3	124.7	-3.3	50.5	3.2
238.9	-9.8	74.1	-10.2	168.5	3.8	79.6	2.8	173.4	-0.2	54.9	2
128.2	94.8	115.5	29.3	368.2	-5.2	66.9	6.9	230.8	15.8	36.4	-4.4
213.9	311.8	140.7	-7.7	280.1	52	30.2	1.5	219	2	48.9	5.2
194.4	113.7	108.8	7.5	-4.7	91.6	27.2	-2.1	160.2	3.4	56	-1.8
132.9	30.6	246.3	-1.4	-2.9	-3	72.7	0	260.2	7.4	42.9	-2.4
311.8	98.3	116.7	55.5	326.6	4.3	4.2	0.1	262.4	-2.2	35.2	-0.5
208.1	214.8	104.1	117.8	271	4.1	-0.6	-1.8	303.1	-3.8	94.7	0.6
1.8	83.4	42	-17.7	80.2	552.8	108.8	2.7	246.5	-0.9	110	3.9
158.2	57.7	96.2	-5	225.1	0.7	50.4	-5.5	223.2	0.3	0.9	0
100.4	2.2	259.5	42.4	447.8	41.2	222.2	2.9	-0.3	77.2	21.9	-0.1
12.9	199.6	291.8	1.1	168.2	11.7	43.8	3.6	119.6	-1.6	24	-1.1
	-3.8	38	-2	57.9	-32.6	14.1	17.7	190.2	-0.7	98.7	0.5
185.1	180.4	47.9	3.9	317.2	-4.4	0.4	1.9	2.2	18.3	-0.5	1.1
390.4	141.3	127.6	124.2	-9.1	-4.3	-2.5	0.8	155.6	18.9	84.6
255.3	-0.9	44.2	120.1	292.2	-3	103.4	4.4	163.5	100	59.8	1
10.7	181.7	50.2	-1.2	157.8	9.9	-4.2	1.9	112.6	2	42.4	-0.8
2.8	94.7	70.1	6.4	223.2	-73.7	84.3	-2.3	118.8	2.2	-5.7	0
121.2	-3.7	63.7	30.3	98.2	14.9	0.5	0.3	181.1	-4.8	40	0.8
100.6	76.9	151.4	-0.4	321.5	-79.2	39.3	-6.1	75.6	-2.7	56.1	0.8
-4.4	93.9	68.6	0.5	179.6	-252	67.7	-0.3	-8.2	-11.3	29.1	-3.7
226.2	5.4	45.2	-9.7	386.9	-8.6	113.6	28.9	34.9	-2.5	115.2	1.5
128.7	2.2	0	-8.8	23.8	-137.7	-3.6	-0.8	150.5	-0.6	47.4	-26.5
6.6	308	159.2	70.4	269.7	-1.3	181.1	3.1	103.1	64.5	90.6	125.3
172.9	111.9	43.9	2.6	313.9	173.8	137.8	2.2	95.4	57.6	35.9	1
340.9	85.9	150.3	80.4	422.8	622.9	3.6	2.2	96.5	2	-0.2	2.2
9	57	-0.1	5.3	209.7	-21	2.6	2.3	102.5	4	9.8	4.2
-1.4	61.9	25.6	16.6	56.2	3.6	65.8	1.4	1.9	-0.5	112.6	38.2
112.5	67.2	56.1	11.6	344.2	-1.1	-0.5	-3.9	82.8	85.5	73.3	0.1
70.5	300.5	52.2	0	0.9	-6.9	67.2	-0.2	-1	5.1	126
	-0.7	85.8	-3.4	42.4	7	95.9	-0.4		0.4	71.4	9.2
3.5	0.1	-0.8	2.5	259.8	60.1	136.5	-1.2	54.8	-7	63.7	-0.4
425	4	134.7	79.8	176.8	-1.2	90.2	0.6	147	2.9	97.2	-12.8
-2.9	281.9	-0.7	31.3	193.6	154.9	108.1	-7.2	-0.2	54.2	56.8	-1.4
7.2	20.1	85.8	-0.6	188	50	133.7	-1	92.4	-5	49	5
43.1	47.1	198.9	-10.9	121.3	-2.4	80.7	29.3	26.4	-2.7	91.8	-0.4
316.1	168.1	69.4	20.4	264.9	1.6	57	-3.3	-3.5	2.8	154	0.8
289	130.6	272.6	133.9	202	27.4	1.7	1	149.2	1.1	62.4	-2.3
241.7	123.3	101.8	-7.1	167.3	5.1	98.1	0.8	-3.2	-3.5	125.4	29.1
228.7	39	46.3	43.4	227.3	-4.8	94.5	-2.2	-1.2	22.1	27.9	0
160.4	126.8	119.1	-3	187	-3.2	63.5	3.9	7.8	-2	1.4	-1.5
392.9	14.2	2.7	13.9	81.8	-2.3	137.9	0.9	80.3	0.4	97.3	3.3
233.8	125.7	52.1	25	277.1	3.5	100.1	1.9	156.8	-3.1	173.4
239	1.1	153.5	-4.3	216.2	-1.6	41.8	2.1	-14.7	0.2	35.4	1.8
222.1	55.7	55.9	145.7	201.2	-1.8	71.4	29.7	92.2	-1.6	65.3	0.1
5.2	54.4	151.1	19.4	271.6	30.8	115.2	-5.3	137	-0.2	128.9	-2.8
235	186.1	251.4	44.2	214.4		125.2	-4	127.5	-2	-3.8	2.7
7.3	51.5	160.7	-16.4	320.6	151.8	147.6	3.2	113.9	1.1	134.8	-2.3
440	77.2	-2.4	-10.2	324.2	192.2	125.2	-5.4	150.5	-2.9	76.4	1
274.2	32.5	96.9	-2.5	126.2	-24.6	51.7	2	119.7	-1.3	50.8	1.2
177.2	169.7	83.9	8.3	-0.3	21.2	162.4	0.3	78.9	0.9	2.6	4.8
21.3	166.4	68.1	-3.4	278.2	134.5	90	-2	239.3	-0.6	37.2	-2.6
210.7	118.9	126	7.6	157.7	11.1	95.5	-2.4	202.7	3.2	123.6
299.9	22.5	29	-17.2		174.2	138.5	-3.9	122	1.8	79.1	3.2
2.2	85.4	104.7	-31.4	95.9	-72.8	39.7	1.4	124.3	-0.2	93.8	-3
-1.6	64	152.2	119.6	-6.3	8.2	137.8	0.1	3.4	3.4	98.8	10.6
446.4	80.9	57	2.2	141.5	13.2	129.2	3.2	70.8	0.9	71.3	1.1
267.4	-4.1	107.4	-6.8	1.9	-11.9	1.9	46.1		1.4	43.5	2.9
224.5	203.3	98.5	-58.3	1.9	12.5	37.2	-19.3	57.9	55.6	0.3	0.7
329.8	268	169.9	-9.3	93	628.1	59.3	-1.9	22.1	1.6	0.5	1.4
365.5	274.7	36.4	-1.1	362.3	2.3	75.1	-2.2	-1.8	0	19.2	0.3
157.3	422.1	46.1	-1	155.6	162.7	197.3	0	54.4	-2.6	97.2	-3.6
1.3	77.6	123.8	-5.7	386.5	66.4	162	27.1	2.5	-1	90.9	2.5
400.1	222.3	50.5	-224.2	8.8	197.1	224.2	-1.6	42.8	-0.7	58.1	2.8
469.9	92.1	3.3	-3.8	85.1	122.7	190.9	4.4	90.3	-0.8	76.3	22.6
305.1	92.9	16.4	121.8	235.5	97.5	92.5	-0.3	63.1	-0.9	0.1	1.8
286.8	284.2	77.8	-6.2	121.7	-36.8	108.8	-2.1	0.1	-1.2	1.5	-2.3
-0.7	97.3	121.2	-0.9	5.9	223.1	98.5	-0.6	-1.8	0.1	122.1	-2.5
472.8	99.7	41.8	191.2	-18.5	-13.4	129.2	-5.9	-0.8	0	165.3	1.2
336.2	41.1	168.3	6.9	78.7	43.6	98.9	-1	3.6	-0.7	93.2	-3.1
391.6	93	42.3	1.9	126.7	10.5	0.5	11.7	-2.3	2.8	81.1	-2
274.9	1.8	89.3	118.7	296.5	80.1	2.2	16	59.3	-1.1	38.8	-1.9
387.4	6.8	77.3	-1.1	170.6	3.1	168.3	1.3	17.3	3.2	0.9	0.6
295.4	48.7	-13.3	-14.5	10	155.4	174.9	-0.4	-2.9	-0.8	61.4	3.6
321.9	-33.2	-3.4	4.2	71.8	42.5	31.5	-6	2.3	0.8	140.4	0.2
342	66.4	111	3.6	74.8	113.7	2.2	-3.6	72.5	18.7	67.5	-3.1
596	23.7	89	37.5	119.5	-248.2	100.6	23	-2.2	-0.5	48.5	8.4
250.2	192.5	19.2	38.1	108.7	37.3	44.1	1.4	171	-2.8	129.5	-0.7
208.4	138.1	53.1	-9.3	0.9	-3.5	179.6	2.8	-6.7	-1.7	69.4
376.1	56.3	59.6	-0.9	-28.5	33.4	45.4	2.5	0	0.6	35.4	14.1
187	20.8	120.3	-1.2	152.8	125.3	33.7	2.1	91.4	0.3	43.3	-7.6
148.3	113.3	5.6	-4.1	110.2	-45.6	1.7	1.1	66.8	13.9	0.9	-0.6
343.8	113.4	81	-2.3	132	-49	-3.9	-2.7	72.5	0.4	45.4	2.4
519.6	188.4	68.6	0.3	78.4	30.3	-3.7	0.6	158.1	-0.6	125.7	65.8
209.6	54.5	39.7	-2.1	-7.4	15.8	118.4	1.5	177.4	3.5	81.4	30.1
220	46.2	76.2	-1.8	-1.5	87.5	125.2	-1.1	28.2	0.6	-1.1	76.2
175.1	25.7	80.7	1.9	436	67.5	2.4	-0.6	57	-0.8	82.6	3.6
146.8	139.5	112.9	163.9	82.7	0	133.2	1.4	179.8	1.9	-2.6	6.9
122.2	145.4	72.7	-6.9	2.3	3.1	70.2	-1	7.8	4.1	-0.1	24.6
86.9	56.2	61.5	8.2	106.1	-1.2	56.3	2.2	-0.2	8.7	56.7	5.7
183.4	226.6	127.2	145.6	60.7	-31.3	62.6	-3	34.4	1.1	-1.9	99.7
316.6	215.3	122.4	-4.7	290.8	0.1	0.3	0.4	95	2.4	120.4	43.3
310.3	118.2	90.2	2.5	241.2	30.1	32.2	4.9	83.7	0.5	75.7	1.7
274	-11.9	55.6	-4.1	2.1	-7.2	64.5	2.2	126.1	16.3	1.6
348.8	96.2	24.2	-5.8	504.2	21.6	47.6	3.4	0.3	2	69.6	65.1
258.2	3.9	51.8	271	203	191.7	107.8	2	153.5		76.8	1.3
133.7	76.4	42.2	66.1	179.7	-31.4	1.7	1.2	-5.2	8.8	82.8	20.6
267.3	57.9	48.1	-0.2	266	119.7	133.7	0.1	-8.2	-1.7	-0.1	-1.6
309.1	47.9	39.5	-16	110.5	9.8	24.8	1.9	51.8	-1.8	166.5	91.7
389.5	67.9	129.9	-9.2	348.5	11.1	139.8	-0.8	73.8	5.6	86	-16.3
390.5	35.6	56.7	6.4	0.5	1.2	71.1	1.7	0.5	100.2	52.7	-2.2
275	151.4	56.3	106.2	210.5		56.9	-0.3	112.9	0.2	86.1	10.7
296.7	-253.6	95.6	-0.7	141.4	-2.8	-1.8	2.3	-2.8	1.2	34.9	1.5
175.2	-72.6	67.8	3.5	73.4	8.8	203.2	3.9	183	-1.8	2.4	-3.7
223.2	-116.4	41.5	-12.8	86.9	-12.3	67.9	0.5	12.5	7.5	59.2	-3.3
673	-46.4	89.4	63.7	177.5	2.2	88.3	0.4	97	0.4	-2	-0.7
27.3	-2.5	87.7	33.7	276.5	-31	27.1	44.8	0.9	2.1	91.2	0.8
263	-282.8	125.3	-3.7	132.8	3	7.6	-1.1	40.4	17.2	-3.1	9.4
86.1	-39.8	44.4	-10.4	241.3	-2.4	21	-1.2	233	3	59.6	29.4
200.5	-32.7	141.9	-0.1	392.4	28.4	-0.8	0.1	77.7	46.8	23.7	1
364.7	-108.6	89.7	-1.4	579.7	-6.9	2.4	2.6	174.5	6.4	5.5	17
277.6	-89		-0.3	149.4	100.7	52.9	-2.9	-1.2	4.4	68.1	5.1
796.5	-63.3	-5.3	-2.8	133.8	45.8	63.5	1.9	160.5	10.6	-5.2	40.4
353.7	-965.3	186.8	34	247.3	241	90.3	0.9	125.5	-2.9	99.9
172.1	-784	123.3	-26.4	208.8	-5.8	-0.1	-2.3	142.2	-6.7	53.4	33.7
190.6	-35.8	-0.9	-0.8	177.5	49.8	16.2	-1	96.1	0.9	2.8	3.2
232.7	-282.8	219.8	0.9	-0.3	-25.9	76.2	-2.6	166.5	47.4	33.1	0
175.1	-75.7	264.4	0.6	46.9	-19.6	93.4	-0.1	52.3	6.8	58.8	754
208.8	-89.3	26.1	-42.2	21	51.1	78.6	-3	8.5		0.1	81.3
210.8	-78.1	3.2	-1.3	3.5	-2	98.6		0.9	8.8	61	-3.6
178.4	-96.9	189.3	3.1	0.5	213.5	-2.5	104.3	215.2	-1.7	-1.7	2.1
267.1	-93.7	100.2	-101.8	-4.2	-12.2	0.1	-0.3	113.1	-1.8	57.7	-7.4
-93.8	-57.3	484.7	7.2	240.8	16.8	4.3	-43.8	108.4	5.6	-0.1	-16.5
219.6	-90.3	554.4	3.3	107.8	-68.3	73.6	11.9	47.1	100.2	75.1	4.3
335.1	-114.1	1299.2	-1.2	97.3	24.8	0.8	22.5	122.1	0.2	34.8	11.1
253	-181.9	233.7	145.6		16.8	-1.1	190.9	-10.3	1.2	0.2
15.6	-92.7	296.9	-9.1	5.8	27.2	0.9	-3.3	102	-1.8	0.8	276.4
343.9	-895.7	488.8	7.4	454.9	-78.5	131.1	-3.3	77	7.5	0.4	-7.7
322.5	-121.3	109.8	5.3	480.2	-55.4	5.4		89.5	0.4	1.6	119.8
234.9	0	358.3	-9.3	-35.9	286.4	1.4	162.3	112.2	2.1	0.5	-0.2
284.8	29.7	223.6	-2.4	292.2	-182.8	3.3	-3.8	2	17.2		-1.3
353.4	-102.8	342.2	19.4	526	-7.8	119.8	-1.8	28.9	3	23.4	3
289.4	33.2	728.5	-15.6	849.1	8.6		7.7	115.2	46.8	7.6	-1.5
284.2	-24.8	614.9	-4.2	230.8	-1.8	131	10.3	0.5	6.4	104.7	-3.1
256.4	-178.8	593.5	51.9	148.8	229.8	97.4	2.2	74.9	4.4	68.9	6
	121.3	277.3	-6.6	-45.2	-61.3	34.1	23.9	111.7	10.6	44.9	8.3
199.1	52.6	437.2	-6.2	128.2	176.7	118.6	-26.2	280.9	-2.9	167.2	3.6
423.9	16	683.3	-13.5	647.4	-26.5	258.1	27.9	31.9	-6.7	107.2	-13.6
-10	0	-37.2	-144.7	238.3	98.1	92.9	29.6	-4.5	0.9	-3	-4.1
379.4	-22.4	194.6	33.6	514.6	213.5	161.9	-7.5	-1.3	47.4	54.6	-3.8
161.5	-442.3	93	-1.8	507	-147.5	56.5	1.8	101.9	6.8	161.7	5.2
283.1	225.7	304.6	5.5	94.2	150.4	137.4	-1.9	-34.7		169.8	4.7
349.2	12.7	359.6	-2.4	310.3	101.3	435.9	-19.4	60.8	68.9	104.8	3.1
216.1	-17.9	135.3	-2.1	15.2	-6.5	174.8	19.4	111.9	17.2	97	-2.8
106	-34.4	655.4	0.1	302.9	-9.9	-2.4	70.5	-2.8	-0.5	126.7	-0.4
507.5	-114.2	469.8	75.3	445.9	-23.2	-3.2	23	3.3	-4.4	77.9	0.8
216.5	0	982.6	8	432.5	48.5	79.7	16.5	77.9	17.1	119.1	-5.2
339.8	-28.8	264.7	-46.6	455.3	4.2	103.9	-35.4	140.5	5.1	73.1	-2.4
238.2	21.3	-29.4	10.3	227	1.2	156.5	-63.9	124.9	67	173.9	4.2
324.6	18.3	210.6	157.3	106.5	-9.1		68.5	93.8	-3.1	152.3	231.4
266.6	147.5	7.1	-13.2	347.2		70.3	-5.3	262.1	47.2	78.1
318.6	259.1	127.9	22.1	528	94.3	15.4	3.3	129.8	1.3	354.7	-6
195	343	166.6	-0.2	406.8	3.3	78.2	-1.4	96.4	-0.7	107.6	-12.3
326.8	176.6	364.1	-1.1	307.8	0.1	143.7	-40	81.2	-16.2	83.8	31.9
411	810.1	319.9	-23.1	62.5	13.9	160	-84.9	88.2	38.1	-4.5	-0.2
241.9	309.9	313.4	22.2	-2.1	100.1	205.8	180.7	70.5	-2.1	91.3	69.4
291.3	302.7	115.2	13	12.4	34.6	164.8	-9.4	-26.5	1.1	91	26.7
204.3	93.9	143.5	-14.7	13.8	-13.5	140	58.5	181.5	-3.7	45.6	-3.1
7.6	590.7		9.8	589.8	-0.1	128.8	45.1	38.6	34.2	92.1	8.8
432.8	648.4	12.3	1.6	463.2	0.8	121.2	-18.3	184.2	1.3	67.2	1.8
245.7	408.3	60.1	-1.7	49.2	-4.8	75.1	19.8	158.4	-2.5	5.8	-1.9
171.6	421.1	38.3	-3.4	663.2	-2.9	57.2		195.8	6.9	96.4	4.1
267	398.9	80.1	-0.9	-14		45.4	4.4	-6.5	-3.9	-1.7	-1.3
187.2	42.8	43.1	-6.9	147.4	25.2	292.8	5.6	124.2	-0.1	188.7	0.3
554.7	291.5	25.7	4.2	214.3	609.7	181.7	3.6	107.7		150.8	-2.6
238.6	181.2	59.5	67	248.4	61.5	129.1	0.9	-2.8	-0.7	108.1	-3
226.2	163.5	52.8	-6	277.2	77.9	6.1	-0.9	165.6	5.6	148.1	-0.7
276.3	124.4	2.1	26.4	177.6	38.2	174.4	1.6	122.8	53.2	-1.7	-0.7
	142.9	25.1	-1	180.9	17.7	139.2	7.6	76.5	-0.9	223	2.4
199.7	26.7	-0.5	2.7	434.9	-82	46.4	5.9	35.8	-2	-4.5	-0.9
0.9	165.8	-0.4	-15.2	544.6	47.4	95	-5.4	133.9	1.3	1.9	1.3
274	74.1	80.3	-15.4	487	-24.2	182.2	-23.7	91.2	0.7	1.7	4.3
	-0.8	1.2	-11.3	429.5	-18	113.7	82.9	-0.6	0.8	59.2	0
88.3	0	31.8	8	-0.6	-17.2	79.4	-130.7	102.6	0.9	283.6	59.6
346.6	-67.7	61.5	6.1		-137.3	113.2	-10	132.6	-0.8	75.3	4.7
-38.1	-58.1	-2	3.1	122.2	57.1	43.2	10.3	118.8	18	68.4	29.5
167.8	-77.9	128.5	44.8	147	-5.2	60.7	5.2	85.5	1.1
379.9	-10.1	-0.7	33.1	83.5	8.5		15.6	60.2	-0.7	289.3	1.6
219	14.7	311.8	1.3	3.2	-2.5	200.6	-3.2	44.9	-1.8	125.5	1.9
134.7	124.8	51.8	-5.7	-13.5	37.7	71.8	-3.3	89.8	2.3	118.7	2.7
222.1	-16.7	23.3	-9.4	119.6	-19.1	-0.3	-0.2	-2.2	-0.3	112.7	-1.8
151	-6.2	49.4	6.2	109.2	28.4	86.6	0.3	139.8	-4.6	117.3	0.2
127	-39.9	166.6	61.4	360.5	-19.9	151.4	0.7	113.8	-5.1	-11	-4.3
261.4	-87.8	46.7	18.1	175.7	-23.5	124.9	-0.9	138.2	15.5	188.2	4.4
	0	57.2	92.9	184.2	-32.8	60.8	55.1	-3.5	-0.3	163.2	0.3
172.8	-354.5	-0.2	-20.7	-3.2	-47.1	93.3	311.5	-3.3	1.3	51.3	1.9
103.2	-43.2	62.4	150.7	154.8	3.8	168.9	-11.6	97.4	-0.7	420	0.4
74.9	-25.6	31.7	29.5	179.8	74.9	160.4	-3.1	93.4	1.5	92.6	-1.3
102.5	-75.9	-0.2	-3.6	246.8	-3	60.2	-36.3	0.2	2.8	95.2	-1.7
83.5	-397.4	20.8	-44.4	186.1	86.5		0.4	138.8	-2.3	97.6	2.9
38	-74.3	37.3	-3	196	-53.6	1	-0.4	-4.4	1.2	66.7	-0.1
95	-130.3	1.8	9	190.4	-49	129	46.5	0.8	2.1	92.3	-0.7
49.4	-103.9	63.7	-27.7	174.8	53.1	203.6	0.2	150.8	-3	149	-0.3
163.3	141.4	19	30.3	292.4	-14.4	1.7	-4.6	191.2	3.1	76.9	3.3
57.1	87.6	56.7	2.7	-4.6	21.7	105.7	7.3	122.5	2.1	0	0.3
228.2	-77.1	0.3	6.9	148.3	-69.8	94.5	-1.8	142.6	2.1	51.8	29
229.7	-46	55.5	45.7	129.3	0.5	207	-2.3	30.2	7.4	109.8	-0.7
169.2	-95.1		25.1	93.9	47.6	179.2	5.7	1	2.3	48.9	0.7
358.6	-64.4	43.5	-4.7	3.9	15.5	2.8	0.7	8.5	9.4	130.1	4.8
0.1	-82.4	22.3	-12.7	75.2	31.8	63.8		-0.2	3.2	18.6	4.2
141.4	-99.4	40.3	21.3	196	-31.1	14.9	-30.9	127.4	5	114.4	2.8
114.8	-197.8	98.7	11.4		-12.8	85.8	42.7	1.5	-0.6	1.4	5.6
	0	77	17.6	-3.5	185.9	59.8	-7.3	167.5	0	1.1	1.4
-4.7	-17.4	65	117.5	27.6	-14.9	109.4	-18.6	-3.3	2.2	66.8	0.1
138.6	-30.8	60.7	20.8	303.8	224.6	-34.9	-20.2	197.6	3.4	192.8	-2.7
160.7	-23.1	58	24.1	12.2	13.1	137.3	-7	156.3	-2.8	107.3	7.3
4.7	-23.4	61.7	12	12	177.5	176.9	3.1	127.7	50.2	74.8	-8.6
157.4	-101.7	25.4	60.4	435.7	88.9	101.2	5.4	73.5	-0.9	110.4	-78.9
113.4	-88.8	62.7	1.3	205.1	5.3	118.3	27.8	120.8	-0.7	1.2	-5.9
149.2	-55.4	49	15	382.6	-5.8	203.5	-6.4	113.1	0.3	48.2	-3.7
-3.4	-31.3	52.8	-17.4	299.8	189.2	3.5	-6.3	28.9	0.4	54.2	-10.3
320.1	-53.9	66	96	34.5	0.5	94.1	0.8	97.2	-0.1	150.2	4.3
262.3	-69.5	41.9	-17.7	161.5	5.6	76.9	160.2	152.8	0.6	90.7	15
256	-145.2	90.6	-5	-0.3		109.5	-9.8	17.1	-1.6	20.1	-1.3
191.3	0	53.3	-1.4	378.7	47.5	375.5	-13	104.8	1.1	18.4	-0.9
185.1	-236.1	98.1	-3.9	542.8	-10.7	-7.2	-1.6	93	1.2	33.8	4.7
188.6	2.7	72.3	19.5	228.5	-3.8	81.5	-2	1.7	1.9	-1.8	-4.9
715.8	89.6	51.1	-11.8	380	76.2	73.8		1.5	-4.6	-3.4	5.2
369.5	-7.4	40.7	-1.1	199.8	7.3	222.9	-2.1	59.3	1	47.2	17.9
184.4	286.3		14.5	314.1	86	86.8	2.5	49.3	9.4	0.3
205.5	16.5	160.2	-55.8	157.5	-24.4	131.6	3.4	69.1	-0.6	191.3	1.6
264.6	-349.6	205.3	-114.8	-48.9	98.3	327.5	1.5	80.1	4.8	56.2	-8.1
208	0	330.9	-48.3	140.3	87	-1.2	-6.9	125.2	-7.7	-0.8	9.1
190.1	-10.7	177.4	130.6	112.1	248.9	120.8	1.3	81.9	-1.1	24.2	1.2
539.4	104.3	-9.9	-52	550.3	292.7	102.6	4.7	35.8	-2.3	90.8	-1.2
495.7	-18	3.6	-33.7	373.3	100.8	178.9	-1.2	91.7	1.8	-0.5	1.8
251.3	-455.5	111.8	1.2	399.3	27.6	53.9	4.6	81.8	1.7	-1.2	-6.7
115.2	96.3	248.9	40.3	420.6	47	113.3	-3.8	127.1	2	108.9	4.7
126.7	36.5	88.1	-13.8	278.5		90.9	-11.8	-0.3	-0.1	4.8	6.6
263.7	245	78.4	38	167.6	82.6	-5.5	16.8	1.1	0.9	160.9	-1.8
136.5	125.1	298.4	6.8	166.5	10.5	75.3	-10.2	0.4	2.7	31.2	10
194.1	69.2	100.1	-41.7	-46.2	-26.6	96.8	12.7	76.9	-0.4	78.2	12.5
136.9	-2.6	282.4	-10.2	59.1	21.5	129.9	-14.5	95.6	-3	104.6	2.4
188.3	181.9	244.1	45.8	466.5	75.3	116.8	0.2	54.2	2	0.8	-17.3
3	-37.6	146.1	-14.7	274.8	23.5	68.8	37.3	88.7	-1.6	-2.6	5.2
120	-47.4	135.9	-12.7	1565.2	52.6	-2	-0.1	-3.3	4.1	18.6	17.2
96.1	559.2	97.3	2.7	266.1	-23.5	165.7	9.4	140.9	2.4	90.8	1.2
	391.7	211.3	39	331.4	12.5		20.1	86.5	-0.4	77.5	-19
376.1	-57.3	148.2	22.7	307	-2.7	163.5	-1.7	132.2	4.5	40.9	194.5
115.5	37.2	375.4	-3.9	313.4	-8.4	195.6	-13.6	105.5	-0.9	47.8	2.4
0.2	18.4	67.5	-16.2	616.5	-10.5	287.9	5	1.5	3.7	28.3	-1.5
56.4	-26.6	124.4	10.4	305.6	-13.6	71.7	-1.2	80.9	-0.2	63.2	-25.3
-5.3	-19.1	176	-0.1	330.1	24.2	29.8	5.8	62.1	-1	37.9	-4.3
306.6	-45.2	147.1	9	238	57	71.4	16.5	74.4	-3.3	18.2	16.4
306	-132.6	87	-8.2	712.2	28.2	-3.7	-8.8	4.7	-10.9		-10
51.4	0	187.3	-2.1	554	6.3	677.2	9.1	-0.3	0.9	0.4	4.5
	-75.2	128.8	-34	81.3	-6.8	152.8	6.2	81.4	26.3	5.8	-3.8
296.2	-124.9	56.7	9.2	149.3	-28.8	140	6.6	-0.7	6.5	32.7	-6.3
-0.3	-76.4	157.2	41.3	172.7	-3.2	452.7	-11.3	2.5	-1.2	-3.3	20.3
452.7	-66.5	123.3	-9.8	123.6	-19.8	306.7	-6.6	65.3	0.5	-0.8	4.2
-4.3	-46.1	143.2	-16.6	7.8	20.1	165	-11.2	-2	-2.1	2.4	206.7
-3.6	-64.7	178.1	-14.9	152.2	23.1	405.8	1.8	-0.3	-0.4	-0.4	1.2
0.2	-121.8	83.1	-5.9	329.1	5.9	1.9	25.2		4.9	2.2	166.2
914.8	-182.8	119.6	-18.5	192.1	5.6	273.8	53.6	95.9	1.3	1	3.7
361.5	-68.8	287.7	-14.8	369.5	-14.2	174	36.4	92.4	-7.8	-0.4	268.5
3	-123.6	149.7	-18.3	559.3	-23.4	333.8	1.2	168.2	9.3	28.2	4.5
-13.3	-117.6	131.8	-7.2	19.4	-21.8	250	14.8	78.3	15.6	14.7	8.8
-6.1	-89.8	68	19.1	151	22.5	143	10.3	145.7	1.8	31.5	-3.7
713.4	-7.1	60	14.8	184.1	13.2	329.1	-60.8	96.8	-2	-3.8	-8.2
654.7	200.2	169.7	25.8	96	13.8	244.2	5.2	160.8	52.6	76.3	0.8
-22.8	-100.4		-4.3	120.7	26.3	172.8	2.5	136.5	19.4	37.3	1.1
222.9	-141.9	119.3	-20.5		23.1	0.5	-13.5	176.2	1.6	53.2	14.6
1.5	-223.6	5.1	23.9	113.5	52		-7.3	173.6	-9.8	2.5	96.1
269	0	70.8	3.1	-1.2		1.6	7.1	328.3	43.5	154.4	0.2
-12.3	17.4	-3.6	-15.4	110.5	-3	-4.7	-12.9	-0.8	3.4	-1.4	1.2
-3	44.5	110.4	-3.4	553.8	2.6	51.4	0.7	257.5	-0.3	55.2	2.2
5.3	112.8	121.6	47.3	160.4	2.7	26.8	4.2	171.3	0.7	93.5	0.2
-1.1	364.1	3.3	-7.7	-16.3	126	29	2.3	65	-0.8	34.6
-3.3	-15.3	65	0	146.5	-13.3	2.5	2.6		21.5	82.3	-1.2
	-86.3	86.6	11.8	204.2	-2.4	78.9	0.4	-0.8	-0.7	1.4	0.8
183.8	-145.8	95.1	4.3	203.5	-6.9	94.1	0.5	-4.4	-1.2	0.7	-1.7
-22.3	0	125.9	0.8	2.5	118.6	60	-2.7	175.1	-1.7	0.7	4.6
63.2	-9.9	149.2	1.7	282	-4.5	81.9		-0.4	14.4	-2.9	-0.3
112.4	224.5	119.2	2.6	250.2	-18.7	84.1	1.3	0.4	-1.7	130.6	-2.5
158.3	92.4	-11	4.8	135.1	20.6	135.4	0.4	123	-0.9	46.4	-0.8
61.1	240.5	77.5	-5.7	277.8	-207.2	29.8	1.4	65.8	-0.7	-26.3	28.6
124.5	-30.2	-1.8	1.8	276.2	-0.1	130.4	3.7	-5.4	-0.9	38.3	-0.9
3.5	35.1	87.8	-3.6	124.2	-4.8	28.4	-0.6	77.8	-2.3	97.7	-5.1
31.9	-42.7	190.6	112.3	46.8	23.1	23.1	-2.7	65.6	2	3	136.1
18.8	-29	56.3	3.8	222.1	217.8	45	-1.8	-2.1	0.5	109.7	-2
48.6	0	53.8	-4.4	138.4	285.9	-6.9	0.7	-9	0.4	54.1	14.8
42	-85.8	77.1	-25.4	125.8	10.7	80.5	4.8	-41	-3.6	2.6	4.1
46.7	51.2	93	16.3	30.2	206.6	75.9	4	55.3	-2	76.4	-1.6
0.3	51.6	110.1	52.2	98.8	109.1	85	-4.2	131.2	0.4	0.8	-4.3
73.8	-5.4	53	440.7	77.8	114.7	31.5	3.4	121.2	-1.4	64.1	-1
181	6.2	96.6	-9.3	138.3	100.4	18	0.5	-1.5	0.2	37.1	3.6
120	202.8	7.8	87.7	88.4	-58.6	3.1	37	175	-7.7	1.3	0.8
	259.5	108.3	-45.4	93.2	-117.5	11.9	17.1	92.5	-1.3	58.2	0.2
127.1	311.4	89.7	411.7	-4.2	-59.3	58.4	8.4	104.1	1.8	-0.2	0.8
47.2	-23.4	86.9	136.3	137.9	1.4	48.4	0.9	119.3	1.9	-0.6	10.6
67.3	-7.2	178.3	191.7		10.4	51.4		129.4	0.7		0.9
1.6	25.7	80.5	-170	213.2	-10.5	111.3	3.3	118.7	0.8	99.4	-1.8
71	0	74.8	124.9	271.1	-0.6	-9.2	3.4	140.4	-2.4	137.6	5.4
10.5	-104.1	41.5	30	542.1		4.7	0.6	1.4	2	90.2	4
123.2	-188.6	1.1	-34.7	344.6	18.4	36.3	-2.4	87.7	3.1	172.5	3.1
15.9	-757.5	88.8	380.3	471.4	0.4	24.6	-0.9	-6.7	1	52.5	4.6
114.3	75.4	102.1	-31.3	821.5	0.9	64.4	-3.3	11.2	3.3	28.9	2.4
210	121.5	173.7	-234.7	131.6	2.1	101.7	4	158.3	83.8	107.8	97.8
108.3	33.7	97.1	-103.8	302.5	0.9	69.7	13.4	-3.3	1.4	104	3.1
0.4	-23.6	60.4	280	252.6	1	81.4	115.2	21.5	-3.7	155.3
284.3	-22.8	50.7	206	281.4	7.5	79.4	12.8	1.1	25.2	38.5	-3.2
40.5	-77.2	45.8	-17.4	194.1	2.6	31.3	31.6		-1.7	66	2.7
37	0	8.4	157.1	192.9	-5.7	48.5	-3.1	0.3	1.7	238.2	0.7
190.2	-27.1	-0.6	-33.3	170.5	72.3	69.1		37.5	2.2	0.8	-2
587.3	-5.4	91	-161.9	192.5	-2.7	72.3	32.2	2.3	0.3	192.8	4
17.1	16.9	-5.4	162.9	7.6	2	-2.5	-5.4	90.3	-3.5	-3.6	24.8
100.8	4.3	98.8	303.8	113.3	10	47.5	3	0.5	-2.5	61.1	-0.5
196.6	34.2	70.7	-20.3	113	10.7	64.9	5.8	-2.8	1.3	93	17.2
344.3	23.9	-2.2	130.8	109.4	-0.3	72.3	-0.8	121.2	2.4	0.2	2
-6.2	37.3	74.3	77.1	186.1	22.2	31	-1.3	1.7	65.4	-2.4	-1.4
216.5	64.4		69.2	199.5	20.5	78.4	48.2	68.6	2.2	11.4	1
366.7	-7.3	62	-125.5	193.8	4.8	226.8	214.9	-2.9	0.9	21.2	1.8
1.6	27.4	62.3	-81.2	113.4	86.1	89.3	-7.1	0.2	-0.2	91	5.2
57.4	-82.5	83	-6.3	279.2	1.7	71	-8.5	126.1	-0.2	44.7	16.5
2.9	0	48.3	-116.3	117.2	-0.5	48.9	2.3	2.1	1.4	80.5	-2.8
88.7	-47.8	-2.3	-157.9	82.8	46.7	108.1	-4.5	0.4	0.9	73	7
220.3	70.4	126.1	242.6	121.2	13.8	88.2	19.9	3.6	2.9	-1.7	16.8
97.3	20.7	121.4	-30.5	28.2	21.3	111.4	-4.9	2.5	3.8	91.5	28.7
	27.4	-10.8	338.7	127.3	-8.7	60.9	2.7	-0.2	-0.9	45.9	-13.3
176.9	-23	71.5	-31.3	141.3	144.3	94.3	-3.9	115.9	-0.9	-0.3	27.9
107.8	78.5	99.6	-48.9	181.6	-26.6	118	-2.4	0.5	15.9		-3.1
-6.5	0	46.2	94.6	143.9	-5.5	20.3	0.7	198.2	2.7	4.4	-4.4
193.2	-48.6	92	70.5	70.8	-1.4	-3.2	-1.1	-1.5	-0.9	7.8	1.7
1.2	-99.4	-8.4	96.4	26.8	4.6	3.2	-1.9	0.1	-2.8	285.7	-1.1
-3	19.6	-4.2	-91.3	173.7	3.6	61.2		67.2	1.6	212.5	0
-3.3	33	103.7	48.6	271	-1.6	3.4	29.2	48.9	3	141.5	-1.9
278.8	-236.4	74.3	-14.5	169.2		55.2	127.4	108.2	-1.1	245.8	-1.9
202.6	-49.9	55.6	-313.1	88.8	15.1	45.4	99.9	53.5	38.7	132.8	1.9
222.3	22.8	154.9	-47.6	210.3	22.7	2.7	15.3	0.8	-1.7	48.1	-7.5
-28.7	-41.7	81.4	87.8	68.6	27.4	3.7	-9.2	75.5	2.1	196	0.4
225.6	-44.4	2.6	-11.4	150.3	-1.3	-0.4	-6.9	-0.8	0.3	-1.8	-6.9
422.8	-81.2	90.8	64.3	133.9	-17.4		168.5	-0.3	-1	112.8	3.8
313.9	-9.3	37	-46.8	109.5	-7.3	91.1	-1.2	5.1	1.4	-1.6	-1.4
73	-13.2	-3.5	274.9	185.9	1.5	123.8	-6.5	2.7	1.5	1.7
26.4	-179.3	81.4	-14.8	165.9	-1	-1.9	218.3	67.5	2.3	141.2	1.1
154.5	0		33.7	137.2		92.6		-3.6	1.5	163.6	-3.5
1018	277.5	45.9	0.9	163.3	1.1	140.8	0.1	-0.4	149.1	-0.7	-5.1
165.1	120.1	31	0.1	97.9	4	78.2	-6.1	-1.2	0.9	4.4	-1.8
525.4	-156.3	61.1	-40	205.5	15.1	135.8	5	4.5	-1.6	40.7	0.9
179.7	-16.4	57.1	-105.2	133.5	3.4	99.4	38.3	60.1	2.1	63.2	-0.6
-5.1	129.5	89.9	101.2	172.5	-2.3	71.2	-1.1	108.8	17.3	154.2	-3.7
175.6	198.6	108.3	45.6	109.7	2.6	76.6	3.2	-1.2	41	40.3	-1.2
-2.6	54.6	60.1	119.8	267.5	13	26.7	-1.3	53.3	1.2	76.8	0.1
-0.9	-53.4	-1.5	191.9	39.7	2	86.5	3.1	-1.9	-0.4	65.5	-1.6
98.2		57.6	99.7	88.7	202.4	100.3	8.2	93.8	-1.3	-1.5	0.4
		64.3	13.1	283.4	-3.6	74.6	8.5	-2.8	-0.5	44.2	-3.4
13.3		5.1	32.4	106	-6	119.9	12.8	56.2	0.3	-1.8	2.7
19.1		88	-4.5	77.9	7.4	-4.3	8.2	53.4	-0.9	106.6	2
2.5		72.7	-0.4	-10.3	-62.3	409.7	19.5	0.8	-0.4	31.7	11.6
0.3		90	0	160.4	2.4	-3.2	-9.3	148.5	2.5	82.5	-3.2
164.6		76.8	3.6	289.5	-76.1	120	22.2	34.4	1.6	3.5	-3.5
0.2		39.7	-0.4	353.2	198.6	173.1	-2.3	61.4	86.3	114.8	-0.4
145.2		84.9	5.2	106.4	-52.5	184.6	0.6	100.5	-1.6		-2.9
-4.4		59.1	-3.6	157.8	-13.2	204.9	-5	20.1	1.1	32.2	-3.6
37.7		176.4	-1	118.4	83.9	131.4	-8	77.5	3.4	44.2	5
-3.1		72.7	-1.3	418.2	-13.6		0.6	-0.5	-2.4	86.1	20.4
-2.4		49.4	-3.1	-23.7	-267.2	111.4	-56.8	103.6	3.6	4.8	3.8
86.2		50.3	7	150.2	46.5	0.7	-2.4	68.5	-2.2	54.8	-0.3
153.6		72.7	9.5	288.8	2.3	-4.2	127.8	100	4.3	55.9	21.3
3		38.5	2.9	-12.6	316.2	3.7		1.3	-3.2	2.1	2.3
100.9			0.5	193.2	-25.6	82.9	-8.6	2.1	0.5	29.1	5.8
37.4		253.6	6	138.1	166	65.5	4.7	-2.7		39.8	-25.7
51.2		196.8	1.6		34.8	7.5	-12.9	33.2	-21.6	53.3	2.8
150.5		548.6	0.6	332	105.1	197.6	-4.7	125.8	-5.3	5.5	-3.6
-1.7		271.1	3.5	222.7	-75.9	133.8	4.8	39.5	-9.5	108.7	-3.2
45.5		-7.4	2.4	10.5	3.7	111	4.6	42.3	0.2	1.3	-5.7
-4.3		10.1	0	138.5	8.2	175.6	-72.3	1.9	-27.2	105.2	-1.7
-1.7		132.1	-1.4	215.5	4.6	133.2	0.5	124.3	-1.7	105.7	0.2
187.6		510.2	1.5	17	-7.7	98.6	-5.9	56.5	-64.5	5.9	3.1
1.6		259.1	4.9	160.8	-9.6	-3.2	8.4	108.8	-3.6	30.7	9.9
3.8		309.1	0.1	117.3	7.5	-8.1	0.5	2.2	16.6	69.4	7
-1.8		257.8	0.1	165.7	-5	212.8	81.6	32.7	-0.3	31.4	2.2
205.6		364.4	119.9	194		50.3	-6	53.6	6.9	1	-9.1
4.8		594.8	4.5	0	51.8		66.1	1.2	0.8	6.3	-2.3
35		339.1	4	51.5	99.5	342.4	97.8	3.9		53.3	-2.9
0.2		422.4	2.2	27.4	-19.2	10.5	-9.8	111.3	-4	116.5	-1.3
0.4		325.3	-1.7	89.1	36.6	498.2	-0.5	110.5	-1.7	14	-1
-1.1		303.7	6.6	233.6	40	401.3	-1.3	134.8	-3.1	2.6	-1.5
22.1		154.5	-5.2	100.3	15.8	-52.9	-0.4	-1.2	3.3	75.8	-2.9
16.2		5.1	-1.4	95.6	46.6	603.8	0.3	2.2	-3.5	98.5	7.1
		1369.5	-0.6	130.1	67.5	63.7	-9.2	0.5	-4.6	67	0.9
828.9			1.3	119.9	0	506.5	2.2	72.5	59	1.9	-5.1
71.1		270.2	-3.1	85	31.9	168.1	92.1	195.5	-0.1	57.6	49.4
508.3		148.5	-1.7	245.8	37.6	233.8	-19.8	147.3	2.6	44	0
241.9		207.9	13.5	156.8		215.6	264.6	-3.2	16.9	4.2	-0.9
273.8		-5.8	-3	74.9	211	225.2	3.3	110.1	2.2	62.4	140
268.1		175.8	0.6	120.8	77	459.6	-2.7	60.6		50.7	-1.8
140.7		615.4	-1.2	240.2	39.9	252.4	-4.7	100.2	9.6	2.2	30.4
228.1		525.2	-0.4	66.5	13	257.6		121.9	-0.3	71.9	-5.9
-5		344.7	2.8	219.1	14.1	222.8	9.3	113.1	-0.7	77	8.7
345.9		377.4	4.5	32.2		161.8	10.6	80.9	0.8	2.5	28.4
339.2		-209.4	23.5	45.9		266.9	32.7	2.5	3.3	104.9	-0.4
253.9		216.7	2.1	260.8		163.5	0.4	55.8	4	58.6	-2.9
335.8		81.4	5	321.7		127.1	0.9	186.3	13.2	13.8	3.4
374.8		195	0.9	205.8		156.5	-2.8	37.9	37.5	102.2	-4.9
74.8		-29.2	0.4	137.5		107	-1.4	0.1	-6.1	36.2	125.3
751.8		151.4	-1.2	232.2		272.2	86.5	112.8	13.6	53	0.1
291.2		44.8	2.4	152.1		217.6	-45.7	107.6	4.2	66.4	9.6
295.2		166.1	2.1	124.8		180.7	-3.9	5	-6.7	48.3	303.7
405.5		367.9	33.7	-55.4		93.6	-1.9	83.3	1	-0.3	129.1
347		104.6	-0.6	248		100.1	-4	141.7	-10.7	27.2	101.3
274.1		212.7	-3.1	301.1			0.9	140.2	18.9	102.2	2.7
306.1		114	-1.3			48.4	-40	1	35.3	16.3	-3.7
342.4		203.6	2.6	162		104.2	-10.3	102.5	-12.4	3.4	-3.1
399.6		199.3	-2.3	42.3		678.9	-3	54.2	-2.7	25.4	-5.1
184.8		23.7	0	115.9		145.3	70.4	73.5			-5.3
3.8		595	-1.4	183.2		106.1	6.1	-0.6	16.9	115.4	-4.4
450.3		446.9	1	97.9		105.1	-14.4	110.7	-9.2	62.5	8.3
-6.1		285.8	1.4	38.5		330.6	70.2	73.1	-0.3	113	1.2
48.2		532.8	1.9	102.5		177.1	7.9	-2	1.3	103.3	2.6
474.7		187.1	5.2	51.8		196.2	7.8	75.6	0.2	-5.8	-4.1
		142	0.5	63.7		158.7	-2.1	107.1	-19	96.2	-0.6
158.2			0.8	72.1		190	15.4	164.8	-50.9	65.8	0.1
92.5		74.8	-0.2	83.3		152.3	9	77.8	3.4	274.3	2.1
142.6		0.8	5.1	107		83.6	5.8	107.8	-19.4	97.1	0.8
97.9		22.2	0.2	134.2		281.7	7.7	114.3	-2.2	140	6
171.8		-3.4	-1.5	148				73.6	9.2	121.2	11.5
187.8		122.3	0.8	155.8		147.3	24.7	51.4	-12.3	164.5	2.4
664.8		35.4	0	94.4		-2.3	7.9	29.2	5.9	140.2	-5.6
144.2		2.3	2.7	61.8		100.2	5.8	3	6.1	112.5	2.1
301.5		94.1	4	16.7		127.1	13.9	92.7	24	114.3	-2.6
6.2		62.8	2.9	31.6		203.2	5.7	8.3	1.3	226.5	71.2
183.1		59.1	-2.2	125.8		169.5	-0.8	34.8	11.2	-1.5	0
222.6		-3.4	-6.1	61.8		209.1	4.4	3.2	68.3	126.6	0.8
189.5		83.6	19.2	18.1		59.2	0.4	78.9	1.9	175.7	-0.5
0		39.6	19.5	61.2		168.2	-11	83.2	-2.8	-9.7	1.4
162.7		52.3	-6.2	-6.3		-2.4	0.5	100.2	44	146.2	-0.6
434.2		1.3	41.7	-30.3		346.8	307.8	91.9	-13.4	226.2	0.8
11.7		85	-4.9	-2.2		213.2	-2.9	127.9	192.5	137.8	-0.6
122.2		50	-2.7	95.6		239.1	8.1	0.5	91.7	78.5
18.2		76.4	1.6	-4.9		145.2	14.7	-0.5	-7.3	120.2	-0.3
144.2		70.3	-12	32.7		249.3	1.4	81.6	2.2	190	75.2
-32.5		122.5	-6	47.4		0.3	40.4	-1.3	-3.6	37.5	0.9
-3.5		35	-0.9	5.1		344.4	74.7	39.5	-1	20.5	-2.8
-5.5		71.2	2.7	53.2		170.7	-3.7	4.5	-28.5	85.5	0.3
71.5		119.3	66.4	15.7		138.8	0.2	48.4	13.9	142.9	-7.8
3.7		78.5	17.1	113.9		-1.5	7.2	-0.2	9.7	123.4	98.7
64.5		89.8	-6	108.2		138.4	-3.8	62.3	-72.2	163.4	-4.9
109.9		43.1	8.8	-9.7		140.6	-8.4	70.8	-7.5	83.4	56.4
130.8		87.7	8.9	20.2		-4.2	7.6	92.5	4	366.2	-2.6
		127.5	27.5	14.8			7.6	1.5	33.4		202.3
31.8		1.7	-4.4	31.1		201.5	0.9	71.5	-10.2	61.6	-2.1
185.1		9.6	-9.6	1.6		89.2	238.7	1.3	-32.2	288.8	106.8
-1.8		-4.8	14.5	17.8		204.8	1.3	28.8	49	130.6	-2.9
-3.6		55.6	50	89.2		159.5	-3	33.6	104.5	-2	7.3
90		59.7	5.6	-16.8		226.2	-15.8	89.7	20.8	0.9	0.6
208.7		69.4	-1.2	149		1	12.4	1.2	8.6	100.9	0.4
-14.8		52.1	-4.6	27.1		130.7	-10.1	154.5	10.9	138.8	0.7
129.1			-9.2	29.4		118.6	-9	132.2		148.8	143.4
1.1		-2.3	25.2	96.3		109.4	28.7	2.3	3.3	83.6	2.6
3.5		-19	-10.2	64.8		280	-1.5	61	39	10.8	-2.3
196		30.7	0	71.2		98.7	-4.8	-3.2	5.6	62	11.6
124.9		81.9	14.6	-11.9		191.5	9.8	3.7	35	281.2	44.6
137		58	-18.2	19.2		70.6	-10.3	42.2	-5.4	56.7	22.2
20.2		78.2	3.1	65.3		83.8	1.9	24.3	-2.3	260.4	28
-0.5		64	200.6	462.8		21.2	3.7	79.6	-0.6	160.9	-7.2
-0.6		-5.1	28.1	33.9		156.9	3.7	99.9	2.8	137.4	-5.4
73.6		1	29.5	63		234.9		2.8	-6.6	158	-2.8
205.5		110	6.3	49.2		79.2	-2.2	37.2	2.5	113.1	10.8
148		5.9	6.2	233.8		66.5	-0.2	1.5	17.8	73.7	-10.2
-2.3		108.5	17.1	18.2		59	-4.6	86.8	-4.7	122.2	-6.8
3.9		49	48.7	92.7		133	1.6	1.8	133	-4.6	-0.8
3		35.2	1	301		-8.1	15.6	-5.5	127.9	276.4	2.3
4		-32.9	-8.5	12.1		90.3	-2.1	90.8	21.7	122	1.1
60.2		15.1	7	-16.6		104.8	-0.8	93.5	-5	68.5	3.9
3.5		46.2	47.1	167.3		110	0.8	-0.5	1.2	123.4	-4.7
4.1		39.4	40.6	54.5		156.8	152.7	87.8	-1.3	57.1	0.4
-1			42.2			359.6	41.6	-1.8	-1	54.8	-1.6
157.3		85.1	89.4	-1.2		362.2	-2.9	-4.4		57.7	-9.6
4.9		-1.6	27.7	81.1		220	74.4	77	8.5	42.3	5
		172.3	2	121		295.2	70.8	-4.2	1.9	207.8	-0.1
138.3		69.8	-7.7	-4.8		288.2	-3.8	192.6	-6.9	2.3	-6.3
58.4		105.7	38.1	133.8		219.1	-7.3	0.5	-0.5	95.2	0.3
143.3		35.2	-15.2	66.8		207.4	-0.6	0.8	-8.3	124.2	-1.7
110.3		11	36.4	7.3		176.6	-6.6	274.8	-0.1	4.2	5.6
66.5		35.8	-4.5	160.8		196.2	-13.6	84.1	-3.9	-6	5.8
224.5		24.2	29.2	127.8		279.8	21.2	33	1.6	-8.6	2.9
41.2		115	-1.8	191.5		124.3	4.1	1.2	26	61.3	-2.8
192.9		73.5	0.1	311.2			135.3	-3.3	5.1	138.8	-2.1
105		1.7	-0.6	375.8		-8.6	-9.5	2.5	-0.4	33.8	-2.5
135.5		-4.4	-3.8	257.5		289.5	-2.7	0.6	9.2	5.7	3.2
301.4		19.1	5.3	96.4		109.8	-3.1	-2.4	9.5	143.9
213.5		-8	-12.6	113.8		-9.2	5.2	62.3	-13.6	62	1.5
103.2		4.8	-9.5	403.1		332.9	-2.1	333.2	-17	179.3	5.2
307.4		0.9	-16.2	152.1		473.8	18.9	19.3	66.5	22.5	30.2
166.9		28.6	7.4	473		-1.7		2.3	6.3	-0.2	-10.7
176.2		231	-4.5	190.3		169.4	-0.9	-0.5	72.4	109.8	148.1
0.3		103.8	-37.4	-9.2		260.2	5.3	51.7	67.6	349.8	148.7
84.7		70.2	-5.1	131.2		108.1	142.7	47.2	43.6	279.8	5
236.3		52.9	2.6	66.5		193.1	115	52.8	0.9	418.8	-4.2
146.1		97.6	96.2	267		366.9	37	208.6		129.5	-7.4
144.2		64.2	44.7	324		-5.5	-3.1	-2.2	-2	69.5	37.6
207.8		536.8	-5.8	196.5		250.2	83.9	41.8	3.2	125.5	102.8
174.5		286	66.1	1.4		-1.8	39.2	213.1	-3.1	344.3	37.3
116.9		-22.5	-3.7	749.6		374	1.4	107.2	4.3	1.6	-21.1
225.5		93.8	104.7	141.2		332.5	-0.7	0.8	1.3	101.2	3.3
193.5		223.6	30.1	434		104.2	8.2	102	47.4	58.1	11.3
258		0.4	36.2	234.8		204.6	5.2	0	9.4	192.5
186.3		175.2	-34.2	200.5		103.5	118.3	1.8	112.8	-27.6	4.8
248.8		285.2	2.7	52.8		335.2	2	1.3		25.4	2.9
248.1		98.7	-20.9	4.8		134.6	8.4	82.2	-2	0.1	-4.5
186.1		41.7	-2.9	-90		68.2	66.9	211.5	-6.8	149	0.6
64.2		296.4	64.4	149.5		139.2	3.7	-3.2	5.2	344.2	16.7
129.6		241.2	-1.3	507.9		-5.4	-6.7	-3.4	64.5	-41.8	8.4
174.9		54.3	6.9	221.6		484.1	-0.7	4	-1.3	283.1	-1
181.5		184.7	-6.1	414.5		170	0	-0.5	0.1	2.2	29.4
137.1		217.2	68.6	373.8		74.5	5.6	31.5	8.7	-15.8	4.8
313.7		142.1	0.9	167.8		345.5		1.6	-2.7	125.8	-2.2
		22.2	1.6	57.2		50.6	5.7	300		-1.6	2.6
192.9		183.9	-1.7	-3.2		73.4	-27.2	1	3.7	123.5	1.3
99.5		125.3	27.1	85.5		26.2	9.4	-1.9	-0.6	46.3	2.6
96.8		189.9	0	58		26.4	7.5	-2.8	-0.8	0	4.1
164.2		153.8	2	7.6		329.7	58.8	1	1	51.5	1.1
239.4		124.3	-0.1	126.3		-13.9	7.5	4.1	-2.6	83.4	1.4
319		95.8	-4.8	-6.5		169.2	33.2	-2.9	60.7	135.1	11.4
257.7		144.9	4.4	136.1		27.3	-1.7	-1.1	-4.7	77.1	1.2
153		21.4	6.2	77.9			101.7	0.7	-14.7	-1.2	-0.9
187.2		128.1	4.9	100.8		2.2	-0.5	87.8	25	87	-3.4
370.5		157	81.7			29.7	-18	2.8	70.8	-2.8	-3.4
111.2		216.3	-1.7	-4.1		77.3	94	-2.5	-22.3	223.5
121.9		209.9	-0.3	64.1		166.8	86.2	0.6	-28.4	-0.2
145.6		5.8	3.6	0.8		-5.5	58.7	2.9	66.3	-6.1
126.7		9.1	2.4	1.3		212.3	-54.1	63.6	-35.3	0.8
249.8		124.8	47.6	0.9		1.1	19.4		-19.6	77.5
298.1		123.9	1.5	56.4		138.4	3.1	522.3	-15.2	1.4
201.6		11.4	8.1	50.6		107.5	-22.4	108.3	-12.3	1.7
354.8		7.9	2.1	69.2		172.2	25.5	132.4	-67.3	-2.2
140.4		395.5	79.1	5.9		124.5	-8.5	351.5		30.8
217		173	49.9	-3.2		35.9	18.6	101	-46.6	-3.8
161.3		168.4	33.3	107.8		180.5	5	164.5	-231.4	0.2
171.2		5.3	-4.6	123.4		232	-18	270.3	-26	-0.5
156.4		129.4	-1.3	108.9		88.5	10.9	81.2	-168.1
383.2		-2.7	-1.8	103.9		83.1	-3.7	210.4	-25.6	-1.8
189.9		93	-5.6	62.3		142	-8.5	621.7	-43.7	-2.6
82		174.6	-1	0.1		-2.5	40.2	507.4	-33.3	132.7
1.7		203.9	-7.5	68.1		8.5		246.1	-20.4	63.7
68.7		179.2	0.3	101.6		12.9	1.1	410	-24.8	157
		-5.6	-0.9	100.8		43.3	-2.7	439.4	-20.8	0.9
42.2		201	-6.3	108.6		10.4	-1.3	71.1	-17.8	104.8
-2.7		-1.9	10.6	116.7		146.2	-4.9	96		176
15.8		2	-2.1	90.6		81.2	0.7		237.9	325.1
109.2		52.8	2.7	120.3		183.2	1.9	125.5	40.1	163.8
59.2		124.8	1.6	53.1		246.5	-3.1	117.1	28.1	85.8
203.9		124.9	-2.2	104.6		176.5	-1.2	3.5	152.7	91.6
97.9		153.4	20.7	97		9.1	-0.2	107.2	187.6	126.9
101.4		109.6	3.2	82.4		1.9	4.9	-1.8	239.1	169.8
51.8		4.9	19.1	96.5		296.5	0.5	0.5	24.6	172.4
-5.3		-1.6	3.3	35.9		2.6	2.7	63.9	461.7	325.5
290.4		402.4	95.9	124.6		278.4	11.6	1.2	-87.4	129.2
53.3		160.2	-0.2	55.3		204.7	-2.1	3	-47.2	170
112.6		108.9	100.1	62.6		0.9	2.2	127.3	52.6	6.2
179.1		4.2	32.8	26.1		277.8	2.8	63.5	7.7	147.8
210.1		46.5	-4.1	52.6		-13.4	-4.1	109.5	108.1	-2.2
80.2		85.9	-0.6	79.9		223	2	2.2	175.8	16.8
115.5		-16.7	-0.2	-0.8		-3.2	33.1	0.8		88.8
168.3		108	7.1	0.2		149.5	-7.7	74.4	-151.9	171.9
188.4		82.9	-6.7	14.1		187.9	29.4	-3.9	-440.2	87.3
44.4		175.6	-23.1	28.7		1.4	-2.1	7.2	-65.2	359.2
326.2		-1.2	-4	42.3		264.5	1.2	25.2	-68.8	285.2
87.2		65.2	13.7			33.5	-4.9	121.6	-76.7	209.8
4.6		99.5	56.6	3.9		197	39	61.3	103.9	195.2
98		123.9	-17.3	64.7		-7.9	56.2	71.6	-221.7	200.1
79.4		11.4	21	-17.9		101.6	1.4	133.3	-126.2	4.1
128.4		7.9	-5.9	42.3		60.6	15.7	73	-126.7	135.6
79.5		395.5	-5.1	9.2		8.7	40.5	65	-101.3	1.7
-4.6		173	15.4	72.4		345.9	0	33.2	-106.7	135.5
120.8		201	0	105.6		245.6	59.1	92.2	10.5	140.6
		168.4	0.9	57.8		3.2	-2.6	48.4	-157.6	0.8
-2.2		5.3	41.1	23.7		51	53	3.5	-20.4	0.3
5.9		129.4	-1.4	1.9		1.8	2.1	4.8	9.8	253.5
187.1		-2.7	-9.7	44.3		220.5	-1.9	-1.6	-102.1	111.3
96.7		93	14.8	29.7		200.8	39.4	1.2	-49.7	169.4
122.6		174.6	42.4	35.1		60.2	-0.1	77.9	-79.8	194.2
-2.8		203.9	98.3	65.1		202.8	7.3	0.2	-70.8	149.2
1.8		179.2	-2	29		175.1	0.2	39	-181.8	0.7
-6.5		-5.6	-4.8	60.5		-3.6	3.3		-111.9	0.3
-13.2		-1.9	-3.4	66.1		202.5	15.6	75.9	-86.3	2
216.5		2	-5.3	93.2		4.6	9.4	-7.8	-106.8	18.7
211.6		52.8	-5.9	21		136.5	-5	8.2	-348.9	66.3
5.1		124.8	9.6	59.4		306.3	-4	90	-169.2	158.9
		-4.8	-2.2	16.7		10.5	2.9	82.5	-119	10.5
148.5		124.9	58.8	76.2		2.2	1.7	141	-92	9.1
3.3		1	-6.1	45.1		133.9	-2.8	9.2	-94.5	175.2
41		153.4	56.8	3.2		229	18.8	2.2	-98.4	3.2
-0.3		109.6	-1.2	60.5		145.5	-1.1	70.8	-115.8	-2.2
60.7		4.9	-3.7				6.6	235.1	-118.3	1.9
103.3		-1.6	3.8	4.2		107	48.1	140	-123.4	97.2
-3.4		402.4	7.8	78.8		1	15.3	62.5	-487.1	26.7
71.3		4.2	17.5	168.6		40.6	0	13.7	-225	3.8
175.6		46.5	-29.1	5.1		9.1	-1	8.5	-216.2	-0.4
1.2		160.2	27.9	60.4		116.7	0.3	22.7	-169.1	214.2
80.7		108.9	-4.1	-8.1		73.1	0.5	247.5		10.6
3.4		108	4.6	62.6		42.1	6.3	-298.6	-209.3	-4.2
72		85.9	73.2	-4.5		65.3	-5.7	-9.2	-126.6	2.5
103.7		175.6	-5.7	3.2		95	-13.5	63.2	-87	8.7
99.9		-16.7	26	125.5		129.6	24.2	89.5	-81.8	-7.2
-2.6		82.9	30	-7.2		129.7	3.3	2	-71.7	0.7
0.2		-1.2	3.4	385.2		47.3	-3.7	31.8	-392.4	-3.3
58.1		65.2	15.8	18.8		70	-12	427.5	-72.3	3.3
11.9		-1	-10.2	1.8		87.9	7.1	5.7	7.1	-8.1
41.1		-4.6	40.6	-2.7		82.2	23.4	494.2	23.4	-6.6
-4.9		-3.4	-9.7	293.6		177.5	1.5	136.9	1.5	3.8
79		99.5	-1.9	-25.1		71	3.6	584.3	3.6	8.1
99.8		-5.4	3.8	333.3		140	-0.9	333.2	-0.9	-4.1
0.3		-5.7	4.1	-31.9		-1.1	3.9	29.8	3.9	4.1
23.1		7.6	-8.1	-37.7		163.6	-9.8	1224.6	-9.8	1.5
15.3		-1.2	9	109.4		81.3	2.4	-25.8	2.4	158.7
		-2.1	-0.9	353.8		77.2	-4.6	57.2	-4.6	-8.3
340.6		-4.3	1.5	141.8		38.4	-15	74.3	-15	-8.3
213.3		-7.5	-1	2.6		123.1	-2.6	0.6	-2.6	3.3
497		7.9	0.2	346.5		53.4	12.2	-32.8	12.2	-2.3
954.9			3.9	8.5		56.1	8	236.3	8	6.5
261.6		129.1	-0.3	-11.8		35.9	-1.1	172.2	-1.1	5.2
280.2		-4.5	69.3	-44.5		80.9	4.3	71.6	4.3	-1.5
-14		143.1	0	129.3		14.7	-24.6	140.7	-24.6	-3.8
153.2		5.2	-1.2	507.5		78.7	4.1	-8.5	4.1	-4.2
-72.1		161.9	2.3	14.2		84.2	54.2	61.9	54.2	5.8
260.1		76.1	26.6	113.5		69.9	0.9	73.1	0.9	27.3
204.2		285.4	-1.2	-7.5			-3.8	100.3	-3.8	36.2
336.8		92.8	0.3	14.3		87.6	23.2	185.5	23.2
12.3		181	16.9	2.4		-4.5	98.7	71.8	98.7	109.1
183.5		230.6	45.2	-56.9		100.7	-1.9	231.2	-1.9	95.4
-5		155.9	6.5	51.7		107.8	0.5	-31.9	0.5	122.2
327		117.8	-3.7	614.4		-3.9	2.3	139.1	2.3	150
437.3		258.6	2.7	205.8		60.4	3.2	-6.3	3.2	304.3
255.6			18.5	153		145.5	8	149.5	8	473.4
217.2		-4.1	-2.9	-2.7		146.3	2.3	-7.8	2.3	938
		-5.1	12.8	13		150.1	42.2	67.2	42.2	71.5
		33.4	61.6	63.9		79.2	-2.1	-1.5	-2.1	113.3
		1.4	-7.4	202.5		171.3	4.5	197.5	4.5	1.3
		27.3	2.5	7.5		86.5	-6.2	143.8	-6.2	105.3
		68.3	17.9			235.3	4.1	-14.5	4.1	44.2
		-0.6	0.7	38.2		115.2	10.6	-0.4	10.6	25.6
		72.6	2	2		103.2	30	7.5	30	11.7
		70.9	12.6	0.7		196.2	0.7	70	0.7	45.6
		3.9	-12.1	94.2		218.2	-0.9	125.2	-0.9	172.2
		69.8	-1	153.3		145.4	6.1	38	6.1	59.7
		76.9	4.8	120.3		58	34	-3.5	34	182
		58.1	-10.3	119.1		460.9	5.4	143	5.4	129.2
		67.1	0.9	121.1		203.6	4.6	31.5	4.6	90.2
		53	0	52.1		45.4	-1.4	134.2	-1.4	54.8
		35.4	-1.4	69.6		158.2	15.3	-0.4	15.3	35.2
		84.9	28	-7.7		68.7	-1.8	11.6	-1.8	69.5
		57.1	-6	115.3		-1.2	-1	129.6	-1	37.3
		99.6	-2.6	271.1		66.7	-0.2	6.5	-0.2
		2.8	-4.4	77.9		28.8	8.5	10.3	8.5	-6.1
		52.3	0	101		59.8	0.9	-9.8	0.9	24.8
		65.6	3.4	76.4		49.3	-2.3	80	-2.3	57
		27.7	115.4	193.9		101.9	-0.7	-0.9	-0.7	33
		1.8	352.3	87.8		46.2	0.7		0.7	32.4
		94.3	72.1	136.7				151.3		42.6
		118.1	263.7	57		241.3	8	151.8	8	57
		54.4	163.6	0		157.7	79.8	102	79.8	42.1
		50.1	-26	70.6		228.2	41.6	99.2	41.6	110.1
		68.6	464.9	147.1		329.7	-0.5	72	-0.5	59.8
		17.6	1.9	688.5		163.8	5.2	39	5.2	52.1
		61.9	-111.6	184.6		25.8	42.5	111.2	42.5	29.8
		37.3	204.3	41.8		390.3	-3.1	270.8	-3.1	89.3
		88.5	107.6	1.4		67.7	36.5	62.3	36.5	42.2
		67.1	-123.5	33.5		-38.8	11.9	127.1	11.9	50.6
		43.2	140.4	456.9		266.2	-1.6	-22.8	-1.6	75.7
		38.1	164	79.4		275.5	-0.2	252.4	-0.2	-2
		27.7	33	42		228.9	-0.5	186.4	-0.5	74.9
		44	200.3	468.8		676.5	15.4	607.5	15.4	47.4
		20	140.8	293.7		308.7	2.3	39.1	2.3	63.3
		122.6	157.5	364.3		439	76	124.2	76	106
		47.4	-49.3	147.9		513.9	9.7	156.3	9.7	57.4
		85.6	165.5	221		96.3	1.4	8.3	1.4	-0.6
		122.4	92.6			484.7	75.9	50.6	75.9	-3.2
		23.8	8.7	72.3		192.2	-1.2	135.4	-1.2	34.5
		59.9	0	74.8		281.9		153.6		21.2
		48.4	55.8	16.4		340.8	-3.5	108	-3.5	23.1
		76.2	-14.9	130.2		246.4	45.5	27.5	45.5	103.3
		95.8	5.7	84.6		300.9	-24	345	-24	15.1
		45.1	51.8	43.1		343.1	38.8	88.6	38.8	-1.6
		20.7	-0.6	291.6		230.5	8.1	175.9	8.1	63.3
		52.6	109.4	169.5		355.5	4.8	82	4.8	17.3
		-0.1	-32	59.2		231.5	-10.2	172.4	-10.2	5.3
		-2	-1	47.3		207.2	-7.8	82.8	-7.8	89.5
		46.9	-42.1	167.1		108.6	-7.8	36.3	-7.8	112
		49.6	-329	192.8		268.2	-4.3	99.1	-4.3	59.6
		1.5	369.6	176.5		180	1.2	156.5	1.2	-2
		56.5	218.7	214.1		135.5	-2.9	50.8	-2.9	85.5
		116.1	136.8	246		166.5	41.8	218.4	41.8	0.8
		51.8	867.5	80.9			0.8	14.7	0.8	92.1
		3.7	-411.6	-6.2		128.9	6.9	272.8		84.6
		20.4	508.5	45.7		-0.9	48.1	164.2		-0.2
		21.8	95.8			54.6	1.1	-41.6		102
		51.9	144.2			76.7	4.8	6.1		152.2
		36.1	-225.7			80.9	-3.3	363.2		-4.3
		65.6	-98.7			66.3	46.9	111.9		119.2
		37.1	212.4			119.9	0.7	11.6		-5.1
			-611.6			150.4	0.7			1
			-40.6			18.4	-3.8	-6.1		7.9
			225.4			18.2	1	51.7		3.2
			-89.5			103.5	6.9	35.4
			-64.6			-5.5	0.2	148.3		320.8
			-93.2			25.3	-2.4	125.2		104.3
			221.8			47.5	-2.1	-1.1		87.6
			-75.9			63	1.1	40		197.4
			-171.9			75.6	6.6	164.4		75.7
			101.7			57.4	4	0.1		89.6
			-61.8			64.9	-0.2	60.7		81.4
			103.9			15.2	-2.2	49		107.6
			15.3			58.4	-7.8	96.6		31.8
			245.1			79.4	0.4	91.6		20.9
			599.3			79.8	-3.6	-0.7
			-1.5			99.2	-4.2	130.3
			-60			50.6	6.7	111.1
			597.9			152.2	-1	74.4
			-14.2			149.9	-2.7	105.1
			-22.5			4.1	5.9	0.8
			-72.4			141.4	0.9	160.2
			26.5			3.7	1.1	73.4
			86.2			130.1	-1
			245.4			44.9	2.5	54.6
			103.6			143.4	11.4	62.2
			10.7			1.9	-2.7	56.9
			-0.8			48.6	-6.9	34.3
			-3.4			18.1	-1.6	75.6
			-6.6			105.6	-12.8	47.9
			0			84.4	1.5	51.2
			-2.6			54.8	2.5	78.3
			-4.3			43.7	3.4	82.1
			-0.8			18	-1.7	75.1
			-0.2			38.8	1.5	57.1
			-2.1			122.8	-1.6	78.3
			4.9			103	10.1	81.4
			-0.8			76.3	-0.6	6.9
			1.6			4.2	-1.7	30.1
			0.5			-6.2	4.7	42.4
			9.6			15.6	0.6	77.7
			0.3			55.4	5.5	-3.1
			11.2			54	33.2	99.3
			-0.9			60.2	0.8	90.2
			-2.8			0.2	1.8	139.4
			-0.6			37.7	-2.9	122.3
			5.1			52.6	-0.8	46.6
			4.6			32.2	-5.2	-2.3
			-0.2			113	1.1	90.3
			0.7			-0.1	-25.7	138.6
			5.2			-2.9	3	28.4
			49.6			112.8	25.8	38.5
			4.4			12.8	-0.6	3.9
			-16.4			45.8	-2.8	0.2
			47.2			63.3	1.4
			-3.1			17.9	8.8	3.5
			32.7			14.6	20.6	76.5
			-44			74.1	-28.1	-3.2
			37.6			82.8	2.8	294.6
			3.2			90.5	0.9	158.3
			20.6			80.2	11.4	171.7
			-47.9			203.8	-4.3	86.1
			-5.7			-3.7	16.5	302.2
			25.4			12.2	0.7	151.4
			20.2			23.6	19	35
			-1.5			20.8	8.7	192.7
			1.8			149.3	5.1	155.7
			62.1			30.2	-2.4	118.2
			-9.2			123.2	-3.9	98.8
			1.4			45.2	40.8	102.8
			64.1			32.5	-1.2	37.2
			-10.9			22.3	-7.5	187.2
			-9.6			11.4	19.6	95.6
			7.3			-3.5	13.2	175.3
			2.4			12.8	-1.4	121.2
			10.6			6.5	-3.7	259
			4			13.2	7.2	176.2
			5.6			4.7	-5.4	124.2
			-3.3			1.5	-2.4	67.5
			27.8			142.7	-3.9	94.4
			19.4			17.1	3.7	156.3
			0.6			81.2	1.4	129.3
			15			80.6	100.2	-2.7
			15.7			7.4	18.8
			-1.6			114.9	-0.7	-2.2
			-22.5			2.4	-0.5	149.2
			0.1			98.4	-0.4	61.5
			-6.1			73.8	0.6	141.3
			5.5			9	1.3	71.7
			0			-1.6	-0.3	2.6
			-4.3			69.6	0.6	145.7
			-2.1			0.9	1.7	82.1
			-25.6			82.5	-1.9	80.7
			-19.5			81.7	3.6	74.3
			-2.7			184.1	22.7	63.7
			-9.9			2.1	22	4
			8.5			105.2	-3.2	9.2
			-18.3			99.6	-4.7	126.8
			-12.3			111.2	-2.1	7
			34.7			150.1	-3.4	-8.1
			13.3			64	5.1	204.5
			1.1			2.6	-3.6	28.7
			-16.2			101	38.5	141.2
			-10.6			69.7	-14.8	184.8
			2.1			4.5	-4.9	41.7
			-4.7			-1.6	5.4	145.7
			0				4.2	173.3
			-2.3			-4.6	81.4	286.2
			5.5			232.5	46	10
			-9.3			191.6	0.4	5.3
			0			200.5	1.8	-1.4
			11.7			95	187.2	84.9
			14.4			58.7	19.5	137.6
			14.6			99.2	18
			-1			91.2	2	133.9
			3.8			57.1	-1.9	201
			0.8			57.6	0.3	2
			0.1			115.1	9.7	13.3
			23.1			92.8	3.4	11.8
			-17.9			126.8	-15.1	-1.9
			-5.1			73	4.2	119.9
			28.7			178.9	19.1	-30.2
			7.9			65.9	-13.5	2.8
			3.6			68.6	2.6	76.1
			-12			72.7	3.9	193.8
			10.6			125.1	-2.7	18.9
			18.7			62.5	92.6	146.5
			18.2			-1.3	1.4	78.5
			-11.9			61.6	-0.6	28.6
			-7.9			33	6.4	69.2
			-9.6			78.7	0.8	8.2
			-33.8			123.6	1	84.7
			6.6			19.3	0.4	130.3
			42.1			62.5	0.4	185.8
			4.2			108.8	-0.7	183.4
			-15.9			158.2	8.5	150.9
			-12.2				-2.3	119.6
			48.5			116.1	52.7
			-11.5			52.8	13.3	2.3
			195.2			107.5	14.5	42.1
			4.9			91.5	12.3	234.2
			-45.7			229.1	-3.7	1.7
			6.9			169	-1.5	0.6
			29.8			204.8	1.3	2.4
			-41.6			657.2	-1.9	-1.3
			-4.1			183	3.9	96.9
			4.3			131.1	16.1	45.7
			-13.4			139.9	4.4	121.3
			-36.8			15.3	-6.5	30.7
			-8.4			26.3	0.2	-5
			26.1			34.7	16.2	75.2
			-31.6			61.9	-41	111.6
			77.4			67.6	8.4	75.6
			0.3			-7.7	-2.8	88.2
			-11			28.4	5.8	97.6
			5.6			43.9	44.7	-4
			-4.2			91.5	25.7	172.4
			-60.3			63.2	1.4	58.8
			-14.7			-2.8	-2.4	73.4
			-12.7			31.3	-2.6	202.3
			-4.9			117.8	10.7
			-12.1			1.8	-32.1	-9
			-5.9			127.4	3.2	488.2
			-7.8			-0.5	-0.2	0.2
			-1.2			-6.9	0.1	125.8
			-56.2			78.6	0.5	29.9
			45.5			153.5	-1.4	216.7
			3.2			11.7	24.5	217.8
			6.7			126.4	-5.2	355.4
			28.2			202.5	-13.6	364.1
			-49.6			6	-0.8	411.1
			2.6			160	87.4	-13.1
			-0.3			172.3	0.7	246
			-76.4			275.5	1.8	264.5
			20.1			180.4	5.2	265
			124			46.5	5.2	203.7
			3.2			94.6	35.7	431.4
			-37.3			125.2	1.6	1.7
			15.5			-9.5	-1	365.5
			57.6			2.4	-0.9	372.5
			-17.8			4.5	-0.1	343.9
			40			121.8	-7.9	11.8
			-24			4.6	-3.4	-12.9
			-39.4			194.4	48.9	-10.2
			-17.9			34.5	-0.5	-3.4
			-6			69.9	1.8	268.2
			0.6			9.8	3.4	11.3
			0.6			6.7	-1.8	136.5
			54.7			-1.5	-3.2	8.3
			26.3			-0.4	2.1	5.2
			14.5			2.7	8.3	127.2
			-3.6			-2.1	3	295.8
			-14.9			28.6	-3.3	6.5
			34.3			-3.2	41.3	-4.5
			14.2			1.3	-0.7	338.6
			-7.8			125.4	4.4	130.6
			75.3			9.4	-2.3	3.7
			-6.7			83.2	32.1	2.2
			27.2			3.8	-5.2
			2.8			46	-1.3	-0.8
			-5.7			73.7	53.9	122.5
			140.2			12	-2.9	96.5
			1.8			10.2	1	162.5
			5.6			140.1	-7.4	-0.8
			-3			20.8	23	257.5
			12			-7.7	-6.8	249.5
			-3.6			185.5	-4.2	117.7
			2.7			55.7	0.8	4.3
			-9.7			-0.5	11.6	187.3
			-12.3			0.3	0.3	96.7
			0.3			82	5.7	299.2
			-5.5			65.5	10.9	2.1
			56.6			151.8	2.6	238.1
			2.6			104.8	2.4	308.5
			2.4			-19.3	0.2	8.5
			20.9			63.8	-2.5	6.2
			-2.9			-3.1	0.7	246
			-4.1			24.2	-3.8	266.3
			103.2			-2.8	-1.3	6.7
			-2.7			-2.2	48.2	-2.1
			43			70.9	2.5	-1.8
			1.9			108.5	-0.2	158.8
			-2.2			53.2	1.1	1.5
			9.3			2.2	1.9	100.5
			-10.3			84.5	3.4	160.8
			-3.8			10.8	4.9	4.9
			5.4			32.3	-1.1	-2.2
			-5.7			14.8	1.6	177.8
			-5			1.8	0.8	9.5
			-2.8			25.1	-2.5	223.1
			-1.3			-3.9	0.6	300.5
			239.8			148.5	-1.9	-3.2
			702			98.3	3.9	282
			1068.1			45.9	2	178.8
			-29.1			8.4	0.1	4
			-377.3			9.6	-2.4	266.1
			-24.7			-10.4	8	1.1
			142.2			285.2	-5.2	3.3
			258.6			56.8	25.6	-6.8
			239.6			-8.6	7.8	0.4
			800.3			12.5	3.7	327
			136.9			4.7	3.4	2.5
			639.6			8.1	0.4	-0.1
			-12.9			112.7	3.3	-2.8
			574.8			20.4	1.2	2.5
			221.3			25.3	-0.7	199.3
			12.5			38.9	-0.6	-1.2
			129.9			-3.8	1.4
			457.3			114.5	0.9	246.7
			636.1			2.8	2	147.6
			616.1			51	3.6	152.8
			603.7			-1.9	-2.2	193.4
			27.6			30.6	0.6	204.3
			-6.7			2	-3.4	-17.8
			149.1			225.8	-5.8	184.9
			557.4			51	-0.1	2.2
			118.3			0.1	-1.3	200.4
			27.9			21.2	5	2.3
			43.6			199.2	1.6	1.3
			524.7			30.3	12.3
			124.5			64.5	0
			97.4			-1	0.7
			143.6			32.8	-2
			96			-7.2	-2.8
			144.4			-5.8	-2.8
			379.7			-2.3	-0.8
			-180.9			-2.2	2.8
			2			-0.4	0.5
			94.2			-20.2	-2.3
			135.4			34.5	1
			133			10.1	37.1
			119.9			11.8	-5.4
			57			-1	1.8
			27.1			2.5	0.9
			16.7			65.8	1.5
			135.1			26.2	-2.9
			53.1			222.5
			17.7			0.5	5
			-19.2			-19.7	-3.3
			-25.1			-5.8	18.9
			78.9			-5	5.3
			17.6			-4.2	11.4
			-5.8			157.8	16.2
			90.9			110	2.6
			181			3.8	-1.3
			-6.3			85.6	1.3
			72.1			61.6	-6.8
			128.1			116.4	-1.5
			-0.7			86.7	20.6
			-0.3			153.8	0
			111.7			92.6	-3
			-8.7			79.5	8.3
			-16.5			71.2	-0.4
			47.5			250.2	-4.7
			16.3			93.4	8.5
			43.7			165.9
			44.6			13.1	6.2
			-11			73.5	15.3
			-29.9			10.5	-0.7
			-50.8			233.1	0.1
			23.3			171.2	3.8
			-182.4			105.5	1.6
			-18			96	85.1
			-4.9			158.6	87.4
			10.8			-0.2	0.2
			14			1.2	-8.5
			-156.7			305	-0.3
			2.2			135.1	-9
			6.4			38.9	-1.5
			18			98	18.5
			-2.8			0.5	-10.7
			7.7			42.5	7.3
			-7.3			290.5	-0.3
			-5.8			-4.8	-3.8
			-2.4			-49.8	5.4
			-0.1			121.8	-2.3
			-13.2			52.3	2.1
			-41			139.6	46.2
			-17.2			45.8	218.8
			-58.5			73.3	13.4
			-41.9			33.8	0.2
			-23.9			-1.5	102.1
			-12.6			1.6	-26.2
			-13.2			-4.8	83
			-9.4			25	11.7
			-20.6			23.5	36.8
						64.2	29.4
			69.8			65.5	-32.9
			39.2			-11.3	-36.3
			33			3.5	160.3
			3.1			268.8	22.5
			160			308.3	-7.6
			-7.8			179.7	53.3
			-157			44.8	-10.7
			203.9			-3.3	16.2
			212			-1.9	-40.4
			241.1			438.8	-4.1
			251.5			21.2	6.6
			112			87.8	-2.6
			153.4			113.9	11.5
			89.4			-4.4	11.7
			152.3			147.5	0.2
						-1.7	2.6
			-10.4			93.9	3.6
			-14.9			26.1	2
			-17.9			97.9	-13.1
			-11			-51.2	-35.2
			-15.6			57.8	6.1
			9.4			32.1	-30.7
			-32.1			287.2	23.6
			-23.2			-20	39.9
			-11.8			105.3	6.4
			36			19.6	-5.3
			20.4			24.1	6.6
			-14.4			19.9	-0.3
			11.1			117.9	-0.8
			60.6			44.5	-49.4
			50.2			184.9	-3.7
			38.5			189.2	163.6
			-2			145.5	0.3
			46.4			196.7	2.2
			35.2			130.2	-3.6
			41.6			12.1	7.2
			187.6			2.6	5.1
			99.3			-3.3	109.9
			18.5			192.3	13.4
			148.8			45.5
			234.2			74.2	-1.4
			134.5			53.2	190.3
			47.6			49.3	141.6
			11.5			184.7	175.1
			22.8			4.9	-12.4
			277.3			-4.8	-0.1
			81.9			-3.8	0.1
			267.3			8.2	-6.5
			47.1			0.9	-12.2
			332.2			6	-9.3
			228.2			176.3	1.2
			381.1			375	3.4
			121.4			87.7	2
			32.2			-5.7	3.4
			258.8			176.2	-2.1
			260.6			-0.2	2
			24.4			36.6	-3
			272.5			1.3	-5.3
			40.1			245	0.9
			309			113.1	13.2
			264.6			27.6	-3.6
			11.3			-5.8	-1.3
			284.4			36.5	-1
			257.1			188.8	-3
			202.1			79.4	-7.3
			146.6			-1.6	64.4
			393.9			199.3	-6.7
			421.1			45.7	-9.7
			172.9			-5.4	0
			296.9			255.8	86.3
			301.8			189.3	-2.7
			280.2			-9.3	105.1
			273.9			4	-2.7
			259.3			393.8	5
			51.6			0.9	105.9
			43.7			-1.2	3.6
			313.1			-0.8	-2.2
			53			119.2	-1.8
			447.4			202.7	187.8
			263.1			23.4	-17.4
			237.9			72.2	-5.4
			246.5			50.8	-5.8
			230.8			-0.9	-3.9
			7.8			296.9	2.2
			25.8			329.8	-1.7
			144.4			183.8	0.6
			236			135.2	6
			258.8			10.7	33.2
			232.6			36.5	18.3
			209.4			161.5	-43.3
			120.7			170.6	9.2
			28.6			34.8	60.7
			22			116.7	180.7
			158			2.3	-1.5
			255.7			74.4	11.3
			274.4			2.5	49.9
			262.9			43.8	1.4
			221.7			291.5	-1.9
			136.4			393.8	128.2
			12.2			0.2	-7.9
			-24.9			-7.1	11
			-6.2			32.1	1.1
			220.2			-4.5	0.5
			219			201.3	1
			187.3			72.2	-0.9
			18.6			-0.5	3.4
			-16.9			-1.5	0
			-11.9			98.1	0.7
			75.3			33.3	-9.1
			79.9			-0.5	1.1
			92.8			-8.3	1.2
			-18.3			6.3	71.1
			-9.3			177.6	-2.5
			42.7			37.8	0.6
			205.9			46.9	4
			8.7			104.5	2.4
			177.6			107.2	1.6
			139.8			37.4	52
			176.8			124.4	1.2
			56.5			6.2	-41
			22.4			134	493.5
			166.9			171.2	-4.6
			153			60.5
			74.8			37.9	-3.6
			47.8			118.5	0.8
			43			0.2	10.3
			126.4			-2.1	5.8
			157.9			12.6	0.8
			78.3			2.8	-2.4
			0.6			184.6	1.1
			13.2			1.6	-1.8
			18			2.9	-1.1
			30.3			1.7	-5.7
			-1.8			88.7	1.1
			17.8			144.3	-1.5
			-39.4			85.4	-2.9
						190.9	2.1
						36.1	-1.5
						-7.8	-1.3
						1.2	1.2
						138.6	3.8
						172.4	1.8
						-4.3	-0.2
						-1.5	-2.4
						-0.2	-5.4
						179.8	5.7
						48	-4.8
						182.8	4.6
						-1.4	0.9
						128.8	6.7
						523.5	27.7
						-3.7	16.9
						157.7	0.2
						197.2	-12.5
						8.9	31.2
						1.9	5.4
						195.5	2
						151.1	11.3
						72.2	-3.3
						21	2.6
						108.6	-0.3
						41.2	1.6
						1.8	6.2
						68.1	-2.5
						42.5	5.6
						201.9
						-2.9	-3.5
						6.2	-11.2
						1.7	-9.8
						80.8	3.5
						168.7	19.2
						197.6	0.1
						6.8	-7.9
						-8.5	4.5
						98.2	18.1
						90.7	-23
						111.4	-1.5
						37.2	-8
						70.9	16.7
						64	129.5
						83.1	4
						54.8	-4.1
						98.1	0.6
						74.4	169.2
						71.9	1.5
						52	0.3
						103.9	1.8
						-0.1	-10.2
						64.1	-4.2
						1.8	-1
						100.1	-0.5
						32
						145
						71.7
						50.2
						37.9
						210.5
						-9
						117.5
						86.8
						255.3
						164.6
						68.2
						-4.8
						131.7
						206.2
						55.8
						255.7
						63.4
						-4.3
						121.4
						85.5
						161.5
						44.1
						49.8
						-3.4
						148.9
						36.7
						392.4
						196.7
						30.4
						1
						5.5
						149.4
						139.1
						2.9
						1.4
						189.9
						109.7
						-1.7
						1.8
						-7.3
						-3.4
						352.1
						0.6
						-11.4
						-5.9
						2.6
						1
						56.3
						2.7
						298.7
						0.7
						112.1
						174.8
						37.7
						-1.6
						143.2
						-0.5
						22.3
						128.8
						69.3
						-0.3
						33.3
						-0.4
						1.2
						459.2
						0
						1.2
						329.2
						119.7
						542.8
						161.5
						225.1
						313.9
						444.6
						409
						375.1
						231.6
						49.2
						26.1
						332.9
						407.2
						0.2
						219.4
						500.7
						27.1
						-5.3
						348.8
						-12.1
						3.3
						598.5
						240.3
						288.3
						245.6
						460.3
						335.1
						272.9
						60.1
						236.7
						206.7
						348
						69.6
						140.2
						1.9
						217.6
						553.3
						248.5
						3.4
						-18
						208.1
						-7.6
						-5.4
						2.7
						313.4
						309.7
						286.7
						4.1
						291.8
						-1.2
						-0.2
						-0.6
						214.9
						1.2
						-1.8
						-2.9
						309
						113
						79.5
						4
						-13.8
						1.4
						3.5
						563.8
						4.2
						28.2
						-9.6
						-2.4
						4.6
						-11.8
						-0.1
						-11.2
						-4.9
						3.9
						6
						-7.8
						-8.2
						9
						1.2
						84.4
						-0.4
						35.2
						1.5
						414.4
						333
						105.6
						50.5
						-5.2
						4.9
						-9.5
						206.2
						285.4
						98.7
						103.5
						-9.4
						259.5
						58.8
						315.5
						265
						0.5
						203.8
						-0.5
						483.4
						11.6
						395.7
						361.9
						178.9
						-2.5
						107.5
						104.7
						70.8
						335.8
						4.5
						287.8
						3.8
						-4.2
						118
						186.1
						7.3
						471.2
						-6.3
						4.8
						-4.3
						406.8
						73.5
						5.2
						0.8
						-2.2
						-4.6
						7.7
						4.6
						110.8
						-4.2
						3.1
						4.9
						-3.5
						139.2
						52.1
						171.2
						8.5
						4.2
						-10
						-18
						-0.6
						-4
						0.5
						652.8
						-5.8
						102.5
						-2.6
						-0.3
						378.2
						-0.5
						4.8
						1.9
						-2
						381.1
						5.6
						-0.1
						23.8
						-6.5
						-1.7
						406.4
						-1.4
						-0.3
						5.5
						76.5
						6.5
						394.2
						417.6
						-3
						-1.1
						6
						48.5
						36.8
						2.8
						49.8
						27.5
						72.8
						-0.2
						34.2
						48.3
						-5.2
						70.8
						63.2
						64.1
						54.5
						64.9
						72.1
						50.2
						22.3
						83.5
						4.3
						54.2
						47.8
						-1.5
						48.2
						35.5
						34.9
						-2.2
						39.9
						98.8
						3.9
						4.4
						47.6
						-5.2
						-1.9
						0.6
						52.8
						78.3
						27.1
						1.2
						1.4
						20
						1.2
						62.6
						39.7
						62.3
						95.7
						5.5
						1.8
						52.9
						-0.2
						1.6
						86.5
						37.8
						-5.2
						11.8
						-6.2
						69
						88.4
						-5.2
						23.5
						69.1
						4.2
						21.7
						13.3
						40.5
						46.8
						28.2
						-1.3
						41.3
						13.4
						6.9
						-2.4
						-2.4
						7.8
						-1.6
						20.5
						35.5
						27.7
						5.3
						-3.5
						36.1
						329.2
						-13.4
						100.8
						153.2
						119.5
						206.4
						54.5
						251.5
						198.8
						231.5
						7.1
						298.7
						360.5
						227.8
						7.9
						129.5
						-8
						130.3
						55.2
						261.1
						102.8
						100.9
						38.5
						147.6
						97.8
						241.8
						169.8

## Sheet: Receptor-Repeat 2
Intensity at 72-ligand origami (co-plated with 36-ligand origami	Intensity at 36-ligand origami	Intensity at 72-ligand origami (co-plated with 16-ligand origami	Intensity at 16-ligand origami	Intensity at 72-ligand origami (co-plated with 8-ligand origami	Intensity at 8-ligand origami	Intensity at 72-ligand origami (co-plated with 4-ligand origami	Intensity at 4-ligand origami	Intensity at 72-ligand origami (co-plated with 2-ligand origami	Intensity at 2-ligand origami	Intensity at 72-ligand origami (co-plated with 0-ligand origami	Intensity at 0-ligand origami
2.2	0.1	299.8	5795.2	14289.6	131.7	-8.1	-7.3	6034.8	956.8	9470.9	-125.9
1293.3	797.1	10408	6091	4025.8	-243.8	27.3	-13.8	4321.7	235	7466.5	1635.8
1937.5	1477.6	1950.5	1110.2	-4435.2	384.8	34.3	-23	4220.5	3426.9	7544.4	1323.5
1852.5	2186.3	9928.1	115.8	5119.9	2857.4	957.2	54.4	3545.4	-130.6	7430	-240.2
1586.5	-601	1922.2	-61.5	4545.4	255.5	3.2	-48.8	3194.3	14.5	7772.7	-422.4
112.8	849.7	70.4	-295.8	5682.9	2520.2	3088.8	5548.2	4560.7	3285.5	16023.1	-276.8
-81.3	1206.2	6651.2	-18.3	5120.4	3429.8	-22.2	10.4	3359.4	-308.2	-6.9	-109.5
2797.8	2471.8	48.5	1183.1	5917.9	2669.5	1671.4	-15.9	5832.5	506.2	12990.4	479.8
1244.1	1283.2	7090.2	63.5	-1220.8	-435.5	-13.5	1.8	460.5	-52.5	9030.5	-89.3
1907.1	1187.3	-48.8	-0.6	10460.5	9195.2	2134.5	-11.6	1146.5	-32.6	11391	56.2
4381.5	1681.6	6214.3	373.2	4290.5	3239.3	2029.2	31.3	4533.1	3.6	5448.9	55.5
2471.8	2748.3	-50.3	253.2	398.9	661.9	2384.1	98.4	5547.5	39.8	6669.5	80.9
1406.4	1368.8	-9.1	6.8	3933.2	544.8	2425.6	-14.2	4033.2	-36.8	0.2	-8.7
2436.8	1050.3	210.4	1.3	6982.5	1671.3	-19.9	117.8	3196.9	319.6	92.1	1.2
122.2	2065.8	40.2	3177.4	3599.2	1864.2	3587	-2.4	3651.4	-102.5	6066.2	46.5
-661.4	84.8	300.4	-38.2	-434.8	323.5	1949.8	19.9	-313.5	7.3	-47.3	66.1
-497.7	89	13.7	-55.9	5056.8	-3537.2	36.7	-19.4	4260.4	640.3	-1.1	382.3
2134.2	1917.2	2880.8	-36.8	4531.9	166.5	51.9	-18	72.8	-25.8	4452.8	1.8
462	200.1	48.2	23.7	6201.5	738.9	3323.1	10.5	3040.9	-178.8	9714.2	95
1968	445.2	1.8	18.2	54.9	-579.3	2196.3	-21.2	2745	815.5	10.4	61.9
781.8	501.8	-40	18.4	2526.2	-1230.8	4078.8		3265.4	-12.3	0.8	-58
3053.9	2082.5	87.7	2.2	4466.4	-886.8	3370.9	53.5	3451.4	117	2788.2	-28.8
1698.1	633.4	400.4	378.8	2043.7	1298.7	3338.5	-204.2	6790.3	-5	8520.2	289.4
1556.5	612.2	5088.9	-23.6	5597.8	1758.3	4982.9	234.5	6560.1	-1.2	23.2	-185.1
4273.3	625.4	1985.3	54.7	2847.6	708.5	2090.3	457.6	2402.6	115.5	6182.8	858.2
2180.5	638.9	1717.1	692.5	2986.1	1240.1	1670.8	2176.1	3214.1	70.6	6401.8	1000.5
1478.7	-1095.8	5723.3	-27.4	8052.9	1216.5	22.2	28.1	-253.8	56.9	-87.2	908.7
1496.5	1606.5	212.1	1320.8	6316.9	1975.2	2333.9	936.9	1545.9	109.3	63.8	1975.7
2118.8	1609.5	5925.1	20.4	5675.5	-540.8	36.6	-35.4	6488.2	368	-109.2	1123.2
201.2	1868.1	0.2	-191.5	-917	-1458.6	33.7	142.5	4966.3	38.1	3694.3	-84.7
2950.2	54.7	-8.4	4535.1	2945.9	3142.9	4032.6	-27	5087.5	-11.5	731.1	10.9
-127	-69.2	50.7	1723.9	1323.9	-158.9	4355.1	-13.2	-119.8	-14.8	2802.2	31.8
560.5	47.8	-9.1	8.8	7917.1	-379.8	4171.5	-285.2	-1692.2	4.8	313.5	2909.6
284.2	537.2	-264.7	3146.5	5397.9	-539.2	2309.5	-164.4	3558.7	0	1881.5	38.5
636.7	46.9	-31.2	5323.1	257.1	2024.2	2746.7	1186.7	5103.5	20.4	366.6	281.5
37		71.5	31.5	-1526.9	1917	3037.5	449.8	5146.2	999.2	-38.1	30
1497.4	10.2	51.6	4.5	6709	837.4	3702.7	901.5	-119.2	34.8	44.5	-2.3
3142.2	20.5	0.9	-37	6684.5	218.2	4106	316.8	2792.5	-46.6	12282.1	-3.9
587.3	-1.9	10.8	32.5	3350.5	-914.8	5930.9	47.8	318.8	-376	123.7	-7.6
1828.8	-11.8	45.6	48.9	1575.8	1159.7	3140.5	-44.2	15.3	46.8	6507.2	10.2
1617.5	-8.5	2336.1	7364	-469.5	-1154.8	2641.2	8511.1	3012.9	71	-61.2	91.4
-302.7	-18.1	2940.8	693.5	-3106.6	9107.5	18.9	9699.4	5116.9	-22.5	-53.2	-21
1868.3	-14.8	7085.1	-46.1	220.4	1228.9	3443.5	530.3	-19.3	15.5	118.6	0
241.7	1592.2	906.2	693.2	2150.1	1558.8	-12.3	58.6	4707.9	39.4	3311.6	151.3
2352.4	452.7	6188.9	-23.7	3252.2	620.1	5431.2	271.1	1949.5	-1526.6	245.2	17.7
2878.4	-6.8	6133.9	-53.1	2534.6	2231	16.1	49.5		2593.1	-10.2	273.2
1892.9	10.5	3145.5	7179.6	2291.9	5603.8	792.4	-85	16044.5	2918.1	2949	34.2
1860.3	153.5	5547.3	6350.9	8082.2	1096.8	5340.2	-102.7	7671.2	538.2	5622.8	-79.7
-57.7	909.7	5296	-138.1	2725.9	-107.2	2.3	-223.3	-8.5	-243.8	1304.9	2243
-12.2	12.1	8428.1	-211.1	3514.1	1004.4	1642.8	379.2	1946.8	1873.8	-58.9	-213.8
-3.5	-6.5	6347.9	850.9	327.5	1174.8	4187	133.5	5158.5	-790.2	3558.5	30.5
1165.9	-5.2	5250	5952.5	2413.2	9799.3	2514.6	238.2	-6.2	-757.6	5575.2	30.2
466.5	-5.6	19.5	-8.7	4835	3091.3	2642.9		2637.7	3212.3	678.2	-211.7
309.2	8.2	5460.1	979.5	6415.2	-319		-8.2	109.4	-37.6	536.2	616.6
2348.8	3.2	2929.7	5998.5	2958.5	-362.9	175.5	-146	-305.9	-201.7	85.4	-199.5
89.5	17.1	-22.6	2519	4638.3	-233.5	-211.1	-33.5	4110.8	112.1	2719.5	-43.1
	-12.5	4877	169.3	3486.5	4245.1	2565.9	3009.7	5927.6	-1491.8	3380.8	459.3
-13.7	-13.9	59.5	1935.8	2831.9	731.8	-241.1	-25.5	2949.2	1718.2	3057	-1697.3
-7.8	7.5	-39.3	7	160.2	-1378.2	3416.5	2053.6	4132.3	-53.5	5227.4	230.8
0.5	26.1	2660.8	23.6	8057.7	-2714.2	414.1	70.4	-33.7	-405.9	-31.2	25.3
14.3	-2.1	-40.7	307.5	3765.6	39.8	2354.3	-412.4	-10.9	3264.2	3065.6	84.8
-8	-9.1	29.8	6334.5	1010.4	-86.8	1619.7	179.1	1994.2	188.3	4177.6	-52.8
17.8	29.2	-49.2	-10.3	2023.8	1776.2	5568	-14.2	4191.5	1824	9518.1	123.7
6.1	12.6	-52.3	-1.5	3757.5	3793.5	768.8	-1.1	-1343.8	8	18.1	41.3
-2.6	-23.5	6619.8	2395.8	2202.9	363.4	-19.5	57.8	2436.8	-130.8	89.7	40.1
24.8	-44.5		4465.2	2346.3	137.5	1631.3	22.5	-1450.6	-173.5	14.1	726.3
18.5	46.9	2640.5	-9.5	4174.4	2102.2	643.4	565.7	3716.2	831.8	-57.2	-2314.6
9.9	1955.3	1999.2	53.5	4191	985.1	-15.5	-33.7	-28.2	151.3	3756.1	-77.6
3138.2	6.8	-66.3	4893.7	6121.9	107	-159.4	536.8	2555.8	-39.8	322.2	34.6
-8.3	-49.9	3406.4	-56.2	3823.5	2436.1	937.2	-55.7	86.6	-1392.3	-191.3	18.7
7.3	1224.6	3185.8	463.8	936.1	3762.2	475.5	11	117.9	-1398.3	6.9	159.5
18.8	-3.1	71.7	29.6	6501.9	-26.2	-9.4		3394.4	-16	-64.2	-439.3
1604.8	28.4	-36.5	3495.5	6937.8	2210.7	1874.2	174.1	4117.5	90.2	1867.2	55.1
1800.2	-14.1	-12.5	34.3	2306.5	1404.2	1125.2	-120.1	-135	-11.5	2414.2	-25.4
2554.5	-18.7	143.8	1385.6	4783.9	-299.3	585.9	-214.4	1803	-1035.2	148.8	17.5
18.6	12.8	-26.2	1869	985.1	-1380.7	1449.4	-31.7	4837.5	8.8	-34.3	0
373.5	-23.4	15.8	9707.3	2893.9	387.8	-12.5	-71.8	5501.8	1494.4	17.5	69.2
8	1.1	25.2	20.8	-371.6	1543.6	889.5	-33.7	254.8	-767.5	2902.6	65.6
8.8	1637.2	-27.7	2.2	1647.2	1064.5	535	9.5	3219.4	18.2	1699.1	-142.3
1643.1	-1.1	-6.5	5.2	-1875.1	-109.5	811.8	319.6	10520.5	5046.7	3147.3	109.2
0.7	-17.9	2465.1	2248.9	5331.5	294.5	644.5	31.4	4901	61.8	1925.4	117.5
-6.6	-20.8	-261.2	-2	1757	2277.8	41	115.5	5450	-238	2036.6	-608.7
-7.5	-1.5	-3.4	4493.8	7923.6	1184.8	849.8	-754.9	-32.5	1177.7	1011.2	32.8
1.2	-8	31.2	1.3	4602.8	3156.5	995.1	-60.7	8326.9	50.5	2725.8	112.9
-7.2	14.7	2071.9	-31.8	1937.4	-548.8	2743.2	-407.2	6510.6	1608.9	532.4	-44.2
-0.6	-5	1.8		22117.8	848.1	630.5	-48.5	6913.5	1222.5	2801.9	-346.8
-8.5	8.6	3054.6	338	5060.2	8267.2	-277.9	48.5	-38.5	2721.1	-10.5	809.5
3.1	1.8	222.2	763	3013.6	1524.4	-675	1445.3	2073.7	773.8	53.2	109.6
14.5	1401.9	-137.1	85.5	3618.5	-2809.5	17	81.8	3112.3	-121.6	3751.3	126.1
4	-26.4	1572.2	247.2	1064.5	-904	1056.7	12.4	41.8	-1081.2	3542.1	9.1
-1.3	3.7	-51.3	22.5	6079.4	2575.5	1243	654.1	810.8	2538.3	3493.6	888.1
15.7	-17.8	-48.7	1923.4	3039.8	1084.6	460.5	22.2	-21.6	-56.9	15.4	-183.2
18.4		2786.7	200.6	3574.6	338.7	1396.4	-294.5	3128.2	7469	871.5	102.9
205	-12.9	2270.1	686.5	5596	-1187.4	584.3	1307.7	4733.3	-10	4463.9	15
1.4	2730.5	690.2	513.8	7783	1621.3	714.7	116.1	1218.2	34.8	3120.6	92.2
4.5	3075.5	2997.2	609.9	4645.1	4871.4	817.8	-92.5	1528.5	842.8	5256.6	-23
3640.7	3201.5	1661.1	-24.8	4108.1	1013.6	1792.8	276	1545.9	1994.9	176.6	-50.5
13.4	4251.2	3583.8	983.6	3379.3	-3170.7	1041.9	-641.7	1815.5	2730.8	1378.9	-34.9
-10.8	4092.2	20.5	1147.1	3725.3	-1974.5	962.9	3348.4	-116.8	756.8	3877.8	1107.3
-18.2	6463.9	599.7	-43.3	4302.9	-240.2	746.2	1550.7	-196.5	939.5	13610.2	-17.6
3920	2941.5	3975.2	19	1958.2	1685.5	339.1	20.4	2186.6	281.7	5700.1	-98.2
18.5	2913.6	143.7	39.2	4014.6	2424.4	482.6	21.6	2765.6	766.3	5057.6	4.3
8.7	7151.8	2126.9	17.3	4193	1273.6	376.5	99.2	-3377.8	628.1	4638.8	-612.8
-30.5	-11.2	748.4	-12.6	8819	1055.2	465.2	-1347.1	1446.8	1724.8	3556.5	-2.8
-1.9	2379.7	122.2	170.8	2634.2	-1841.4	489	79.2	4231.3	-1021.3	9.2	49.5
-1.2	2432.1	2616.1	-3.3	603.9	689.5	336.5	-109.1	1179.9	-392.2	1439.4	94.9
28.8	4715.9	2989.2	-8	440.4	3329.5	-607.1	88.3	4500	-248.3	2165.4	-58.9
48.1	-25.5	1641.2	13.7	-365.5	-263	5775.9		4320.7	8.8	0	61.3
2945.1	3249.5	47.2	1320	-812	-343	130.1	2.6	2201.5	0	7450.6	-17.8
6647.1	5871.8	821.2	-476.4	2683.2	1111.6	2282.8	252.4	5686.3	72.7	3125.3	7.4
4.4	3391.8	622	-5.9	5478	-1225.5	954.1	15.9	2159.2	30.4	1665.2	10.9
1943.5	3763.3	36.7	3.1	2897.2	-51.6	673.4	12.2	6696.7	-34.2	12799.1	1377
4.3	1660.9	149.2	676.8	780	-262.2	362	474.2	4381.8	633.1	22739.2	-1.2
8.2	3155.4	34.2	723.9	110.8	-259.2	4876.2	3248.2	4235.5	77.4	6345.2	-27.2
6.8	2428	281.9	1065.2	3880.1	-110.9	-3.3	-162.5	3650.3	-761.9	10820.6	-47.5
-19.8	1990.5	-472.8	201.9	3914.6	544.8	3025.6	-29.6	4264.3	95.7	4509.2	11.9
-43.5	3225.2	1498.5	634.6	724.3	250.7	498.2	-2.3	2457.7	392	9406.7	-3.5
3948.5	92.3	3919.7	27.2	1751.3	322.9	816.2	0.8	1536.8	-403	1521.3	-12.3
-6.2	3332.5	-141.7	-88.7	8880.6	-949.3	1293.4	25.5	805.3	-14.2	6602.5	7.9
4366.9	-11.3	2167.9	1189.8	4273.3	784.2	345.4	77.1	2219.8	-9.1	-18.8	0
6.5	2974.6	84.2	856.5	2414.6	-87.6	1478.9	-15.8	1743.1	44.8	200.8	9
3109.2	-14.6	2035.7	296.1	3307.4	-507.2	3239.3	148.9	1436.6	-28.2	186.7	3.2
10.2	4057.3	2616	-2.6	1814	737.5	3302.5	-3.8	755.9	343.5	71.3	-9.6
5486.4	-345.5	856.8	2127.8	7308.5	-3056.3	8589.5	55.2	862.9	99.2	7172.6	-29.4
1684.8	6752.3	4207.5	1766.9	403.8	990.5	1868.6	768.5	-15.6	38.4	9761.5	-12.6
-16.5	2985.7	440.5	374.2	7993.2	584.8	48.1	522.5	4407	-257.9	3538.8	-7.1
-3.5	403.2	1827.2	-87.5	-315.2	5403.9	69.6	-36.2	75.9	-471.5	820.4	-4.8
4532.7		1974.4	-23.4	-3895.2	1505.3	-57.2	-227.8	2003.1	32.8	-69.5	21.8
294.7	529.1	49.1	3077	9257.5	-140.3	172.4	71.9	-2.2	-91.8	14028.6	43
30.8	759.9	3162.5	988.2	3470.8	3358.6	-179.2	-39.2	531.3	-36.4	8868.7	17.2
-10.8	7.5	57.1	1170.8	435.7	-1863.2	11148	-1198.5	4364.6	4.7	7357.6	129.4
122.2	15.8	5126	1885.1	-1104.8	-287.2	13175.4	-8.9	3612.2	-9.5	10529.1	60.2
4688.8	-235.3	2611.3	3142.1	12022.3	-986.2	-0.5	13.5	16	1.6	818.3	315
2438.2	137.1	5739.9	164.5	1779.8	524.3	30.4	-128	-853.5	81.8	1689.5	-271.5
59.7	42.4	1457.5	-122.2	7155.4	1709.5	268.5	-97.7	6137.6	25.3	674.8	488.8
3171.3	-5.3	4223.8	604.8	4258.6	1125.9	-37.3	-30.4	1376	2729	8336.4	-62.1
4272.5	660.8	-21.5	844.1	9903.1	-501.3	-14.6	1188.4	3139.1	207.6	9899	-8
-21.8	1482.6	3858.4	1072.2	2287.5	998.5	15109.3	3317.1	2490.9	-35.7	640.7	15.8
1977.9	402.8	3918	-188.3	5166.5	447.4	62.2	-1436.6	4084.5	-15.8	16585.2	-192.7
1.8	29.9	4714.6	43.3	5903.2	3427.5	17201.6	-63.8	230	68.2	5263	-20.9
11.3	410	196.1	1951.8	4865.8	1645.7	13417.5	41.8	1215	0	2768.2	-25.9
-8.7	447.4	3673.2	2981.7	4301.5	-428.4	125	-38.9	2919.8	739.9	7697.2	315.1
11.3	1312.1	5044.8	1092.9	16725.5	-37.4	128	-68.4	2941.5	-48.2	8528.5	-9
	-3.8		1070.5	5046.9	-662.9	12091.2	-34.8	20.9	-52.6	2777	-45.5
-15.8	2012.9	22.6	355.5	7360.5	-1863.2	11769.9	547.2	4024.4	-27.1	5245.9	14.5
4541	768.3	22.8	1076.5	2244.7	969	-176.2	-898.7	3676.5	7.5	6651	468.6
6520.1	2060.1	926.3	260.5	2982.1	1682.2	18298.2	1471.2	10207.2	-1.3	12066.5	-225.3
-6.1	696.9	1265.3	-190	5367	556.1	3171.8	414.5	49.8	-26.4	3184.6	7.6
5399	-376.5	47.2	-6.7	6806.8	-94.2	13419.2	98.5	4163.9	-43.5	515.8	216.5
7281.2	-68.1	2205.2	125.5	4803.9	1616.2	10599.1	3784.2	1483.1	3.4	4502.1	180.8
176.2	1326.8	24	1220.7	2127.9	638.2	11701.5	9.8	6.5	0.1	8603.1	-14.1
-119	-351.7	745.4	341	2863.3	1134.2	-103.2	1952.2	556.2	-53.9	2709.3	-50
47.5	1586	2519.2	-416.7	5275.3	3385.5	18190.2	8.6	-40.2	-18.7	7134.4	-11.3
69.6	34.9	1554.3	405.2	-136.5	-118.3	9543	-490.2	2463.1	-76.5	41.6	-31.2
6305.8	2464	1387.2	-256.1	3736.8	367.7	8528.3	-942.5	6957.1	-38.5	11802.6	43.1
505.8	430.9	4701.8	520.8	7573.8	2367.9	-84.8	0	5533.5	-43.7	10830.2	-275
6517.2	1601.5	4195.8	-283.3	208.6	-2725.7	-20.8	0	5623.8	53.2	4252.8	-30.5
7016.3	90.9	4550.8	487.6	2792.6	4258.8	11580.8	-458	55.8	3650.9	7327.1	-174.8
10675.5	1246.7	1196.3	181.4	3226.1	1697.2	130.3	46.1	2336.5	-0.2	5818.6	-15.8
5561.1	29.9	2549	580	9730.8	2708	10407.5	179.1	1854.4	72.1	2941.5	25.7
-2	-39.8	829.2	-81.2	4558.2	317.8	14245.5	-1417.3	8673.2	-82.5	2873.5	-0.2
8.5	902.2	3941.2	1833.3	5593.8	-89	13637.5	8.4	5193.5	151	6612.5	5.2
4750.7	27.6	1280.4	719.1	6495.7	857.1	12990.1	1010.3	2235.1	28.1	8450.2	9
-15.6	-686.5	1903.4	142.5	3613		9721.2	2386	5377.5	-24.2	2594.8	-1.1
4809.8	1383.8	3239.1	842.4	5663.5	-16	9472	-746.5	8453.7	1109	2818.6	20
14.4	152.1	1330.5	843.4	3110.8	117.4	275	-93.7	1566.5	1590.2	2228.9	66.7
3527.4	1026.8	2083.5	660	4711.2	-187.5	372.8	0	851.5	42.1	-212.5	-17.3
5156.1	2354.8	1353.8	1032.5	6908.4	31.1	142.9	-63.9	4388.2	2730.1	2791.6	29.8
5805	83.5	2057.3	1248.3	3225.9	1964.8	11110.6	2880.2	8.6	-19.5	12048.2	32.3
5558.9	1271.6	1820.4	-412.8	2672.5	-105.7	58.8	298.5	11.8	185.5	9183.8	-3.1
4870.2	2026.5	3.7	129.5	-2226.8	828.5	21080.5	82.2	4075.2	-147.6	-30.8	-9.8
5596.5	920	20.7	255.6	-333.5	-228.1	8271.8	-603.1	1917.2	-222.8	3299.3	6.2
0.7	-22	3143.7	2870.2	4882.4	3291.5	95.4	-148.3	8247.1	186.8	79.5	3.8
8001.7		-44.7	-828.9	-1859.5	-1248.7	13130.2	-879.6	-2986.7	88.3	2295.4	-4.2
-5.2	630.5	764.5	2013.9	-57.2	-1467.5	11480.3	-1240.2	-31.6	117.4	536.5	0
4240.8	771.6	1717.8	160.3	274.1	-477	23.5	-3266.8	-19.3	-3484.3	6462.5	-43.5
3642.4	-28.9	3812.9	-977.9	193.9	70.7	137.2	-2513.9	81.9	-24.9	8067.9	-24.1
6522.4	332.8	-6.3	925.2		4739.5	67.6	2507.4	1945.2	52	8923.3	24.5
2657.2	4.3	1955.2	-2053.6	3319.1	116.3	-99.6	-465.8	28.4	-301.7	7272.1	-21.5
1289.6	43.5	1664.9	56.4	-0.2	1065.6	145.5	-1970.8	513.6	-1995	-115.4	157.8
5609.3	4.3	2223.4	-11.1	51.3	352.5	9794.2	-27.2	1657.8	67.2	-16.8	113.8
-25.2	-2.2	1074.9	1483.2	3710.3	1789.8	105.2	608	-14.8	83.9	9284.2	-41.5
5574	161.8	-1.6	3885.2	2898.2	557.2	-206.3	404.2	6535.8	-45.5	-125	7408.4
4929.2	-11.2	3948.3	-88.4	1724.2	1903.5	247.8	182.6	6.6	388.9	-110.5	-28
5609.9	120.2	-7.9	742.8	2443.6	-846.5		63.6	1616.7	-541.1	30.4	20.9
7002.1	-13.8	872	2.8	2538.9	115.5	5940.3	-54.5	-141	-622.9	-49.8	-18
8572.8	1459.7	1573.6		1960.5	-767.4	137.4	125.1	633.2	-88.4	6850.9	76.1
6371.5	1003.5	-12.8	-21.5	1359.5	-74.6	7697.5	84.6	5452.2	-7.2	102.9	1.1
6345.2	-39.5	2.2	2872.5	1468.1	-54	7828.8	-37.4	7256.2	-195.5	0	598.8
0.8	46.8	7.2	429.5	1930.7	756	-32.1	-1.5	2390.2	54	5421.5	6.5
6206.6	-16	-19.5	-16.8	431.9	492.2	301.5	34.7	-22.5	-75	11630.4	-5.7
5678.8	298.8	1295.4	411.5	3708.6	580.5	14340.6	120.2	6.1	-30.3	-8.8	25.7
-18.1	115.9	-19.5	15.5	47.5	-599.1	3.8	-18.7	5253.6	-67.1	119.5	19.8
3458.7	-17.8	2525.3	56.5	2410.5	331.8	10363.9	3915.4		0	3.4	-13.8
9980.5	9.8	825.5	756.9	5568.2	172.2	4935.8	-407.8	1589.8	0.8	3172.7	188.9
4672.5	65.2	1604.8	867.6	4356.1	216.5	3312.7	-25.3	5761.1	-22.9	4026.5	20.2
3458.3	1137.5	3396.8	619.6	-355.2	117.7	4708.4	1976.1	4364	6.2	54.5	293.9
377.5	666.2	1336.4	207.8	563.8	-3030.6	9621.2	-1052.2	11	-7.6	4192	964.4
2559.8	-12.5	1490	317.7	1561	969.1	2649.5	-414.8	3873.7	-30.8	82.6	-20.9
5998.5	217.2	-65.1	-12.7	665.7	462	11475.7	1296.2	2181.1	2923.6	19726.6	111.8
6752.3	303.8	-14.8	982.2	1646.6	-342.7	10409.5	907.5	6032.1	-199.7	153.3	50
14.5	44.5	2044	1285.8	1333.3	-391.8	3870.8	50.5	1982.6	171.8	87.8	-15.4
4917.9	165.2	1468.2	777.6	3157.2	597.9	3089.5	325.8	2919.6	2120.8	-233	85.2
66.4	1815.8	1234.5	775.6	2108.8	466.5	3010.4	-183.3	7245.6	922.9	4940.4	42.3
30.7	366	3730.6	1338.1	2728.5	-53.2	3506.2	464.2	1210.5	-415.6	700.5	-24.4
5475.4	0.1	-2.1	1762.7	1607.9	732.4	-51.4	2381.8	7531.5	-45.6	1194.6	74.9
	762.1	1334.5	3362.6	2072.8	-363.2	8901.4		5386.1	5952.2	4826.6	-19.8
1796.9	-190.8	17	560.2	-646.8	-304	-8.6	6.7	4411.2	-85.1	-56	-13.7
152.3	90.7	-21.5	1104.7	-118.4	508	3238.5	1	864.7	-420.8	3328.1	26.5
787.3	2179.7	1844.7	1365.9	1478.3	1788.4	7448.5	-22.1	10554.9	507.3	-298.3	-4.5
937.5	23.2	4315.5	1686.8	6455.5	699.7	2576.2	9.6	4078.1	24.2	3315.9	3.5
-39.7	420.4	1960.8	507.5	513.8	-95.2	4759.9	2466.1	-8.4	2524.9	-79.3	10.8
463.1	244.3	-42.1	1179.7	2611	1166.5	4931.8	3469.9	1127.5	-519.5	3547.8	-32.3
807.5	407.4	1018.7	1758.7	-297.8	283.4	2863.3	-97.1	2934.5	-232.2	514.6	1.3
1449.3	184.5	3954.6	726.5	950.7	-32.1	5059.1	21.2	-8	-21.4	3376.7	3
16.7	-5.8	2036	518.5	967.9	1131	2033.5	-200.9	-38.5	139.4	1851.5	429.8
-2.5	173.1	1420.4	123.5	-345.5	599.2	4196.9	-45.8	2366.9	-37	3711.8	523.9
1196.5	172.3	8678.8	749	938.1	-1240.3	2693.1	510	2664.1	4.7	2760.4	-106.8
-103.5	375.1	1323.8	36.5	455	998.2	3552.9	919.4	5230.4	-46.2	570	167.4
1199.5	231.8	856.7	904	4806.8	-216	3006.2	464.4	4414.6	-82.2	736.8	10.6
908.7	255.5	1905.8	840.6	-14	409.2	1154.8	1489.2	3732.3	298.2	4135.1	1867.3
85.8		1731.3	447.8	652.4	-203.7	-111.2	-36.9	4615.9	-11.4	1177.7	-10.2
649.9	64.6	-61.9	562.1	1396.7	916.2	4313.1	-1230.8	3163.5	0	6093.8	-32.2
4.9	22.2	6897.4	1879.5	2991.6	-540.8	3149.8	-151.2	2261.2	761.3	3797	58.3
1387.9	14.5	4537.1	-60.3	-709.5	345.8	3726.1	-628.4	134	-100.5	3548.6	20.4
50.7	2.8	1859.5	-638.9	505	893	4034.8	92.2	3998.2	-59.4	-29.2	34.2
1624.5	9	7445.8	-21.4	-512.7	656.4	43.3	-27.2	7608.3	-60.4	2853.1	98.7
766	-2.2	1325.2	2477	1148.2	-1303.3	5058.8	-44.1	3405.2	-149.9	1355.6	10.4
403.8	32.5	4169.3	607.3	1313.9	307.5	7773.4	-17.1	3267.4	45.5	720.8	788.7
1317.4	33	983.4	6.2	95.5	-233.7	-0.7	1055	2771.5	941.3	-6.8	129.1
3973.6	-17.5	2730.2	1538.3	-177.8	-292.3	2636	410.7	4956.2	8005.5	38.8	-50.6
-249.6	106.8	-309.7	2359.5	1498.8	1657.8	1986.8	2460.8	77.8	569.1	63.7	-8.5
1562.5	-5.4	1220	-26.5	1822.2	768.3	1073.8	513.4	389.9	8185.9	-44.9	-26.9
298.6	570.8	-50.6	25.3	-91.4	-1181.2	-27.6	25.5	842.2	865.7	1862	-7.8
2343.9	-46.2	5327.8	546.7	1936.3	789.9	3256.9	-433.8	-27.9	2759.5	29.8	-26.4
5309.6	7.1	7721.8	-8.8	1857.3	-680.1	4172.5	-379.7	-42.2	1674.8	168.2	-21.3
912.4	28.5	4827.3	604.8	2992.8	-80.8	-176.1	2175.2	4868.9	77.9	1469.2	35.6
359.1	-19.8	10292.7	-18	4165.9	-36	249.8	-188.8	3726.8	-80.9	1697.8	354.5
58.5	14.2	6094.5	-6.2	1202.5	-520.4	5355.2	6947.6	1582.8	982	1.6	24.7
1155.8	28.1	3725.9	9.2	-290.8	97.9	270.4	1742.4	23.9	-75.2	16.8	-16.5
-33.5	7.2	2004.1	9.5	2536.4	805.3	3199.8	78.2	-30.2	2.2	7.9	0
1821.1	632.4	5227.8	-448.8	2106	-799.8	3758.2	1746.5	-22	28.4	-6.5	21.7
782.6	20.5	7225.8	1655	-478.8	42.2	1.7	1384.4	15.3	125.5	1521.5	34.3
1563.8	-0.1	9789.7	-23.2	1928.5	2284.5	387.2	113.9	6986.8	193.6	1209.2	-19.5
380.5	12.6	2497.4	-3.5	-44.6	122.8	-60	1366.2	2240.3	39.2	-24.4	1187.2
1124.7	107.8	6906.8	-24.8	2012.9	609.8	39.1	-287.2	3959.5	114.9	1666.3	166.5
-8.8	1184.3	4870.6	331.6	-317.2	1065.2	5513.7	723.5	-5.3	22.5	863.1	-42.3
1970.4	34.8	3181.6	-7.3	1348.9	277.9	4198.4	-53.1	3349.5	98.1	7.1	227.6
688.9	-0.5	-15.6	1092.1	1159.5	-101.9	4716.8	-18.6	4788.3	-70.2	-11.4	15.1
20.8	225.4	5822.4	44.5	1043	-740.1	2949.2	-120.8	3637.1	-5.5	1443.8	34.8
5809.5	-35.8	571.9	20.6	2154.6	-380.8	-24.3	38.2	-14.4	-57.4	1606	-11.5
1026.8	470.5	9164.6	-0.8	1024.1	-39.5		236.8	3834.1	51.5	2023.5	-669.2
4976.5	43.2	87.8	486.6	-50.2	-208	14109.2	-22.8	2135.1	93.5	1795.2	-39.5
683	-7.6	1521.3	1337.7	1145.4	696.6	3612.8		9.5	-12.4	1100.7	-74.1
85.5	44.6	5918.5	-25.5	1163.9	-666.5	16287.4	-8.7	5905.4	-137.1	1711.5	123.8
-16.7	-15.4	1861.5	13.8	307.5	1460.8	6778.4	42.9	7874.8	-13.8	20.9	1170
660.4	2101	7409.5	23.2	-20.4	656	12	6478.9	12954.9	-0.4	1106.8	72.2
3893.2	498.3	-108.4	7594.8	-18.2	-183.5	3374.3	-1	12905.2	847.5	2297.5	112.8
1961.7	-19.8	1488.8	-1.5	4257.9	-608.4	85.5	5810.2	8166.1	-294.4	1508	-448.4
160.3	-26.8	5378.8	-38.7	1435.5	307	53.3	-67.1	5990.1	48.8	1270.7	-1.9
817.7	840.9	9.6	269.7	2449.6	-447	6618.5	-18.5	2109.2	120.5	4369.4	40.6
1640.5	1349	1790.1	3434.9	1406.5	712	6701.5	644.3	1762.8	122.2	1187.2	-8.2
-14.2	2230.8	43.8	1625.2	-32	255.7	3182.2	50.8	-5.4	54.6	1615.3	-572.9
37.7	-566.3	70.1	654.3	4693.3	84.4	5719.3	0	59.5	-20.6	1459.3	-164.8
	-7.5	1406.2	-4.8	1497.4	-54.3	7979.8	0	866.4	-306.5	677.7	5.2
710.5	21.9	6182.3	29.2	810.1	202.3	-40.5	14320.8	-10	265.5	690	-17.5
983.5	775.9	5581	1432.2	392.8	-1541.5	-22.2	-3309.8	1951.5	69.3	1624.4	61.8
456.8	-58.1	2465.5	21.6	1084.5	-264.7	4428.8	151.6	1981.9	390.8	137.8	26.5
32.8	1084	7959.7	1773.1	1979.3	239.8	45.4	-82.5	29.5	1331	618.1	301.2
-52.2	3262.2	1825.8	60.6	1191.5	337.5	70.5	0	125.5	-19.5	818.5	2.8
37.3	34.1	1345.8	1218.5	-49.5	97	12990.5	0	274.5	4.2	873.5	-33.8
625.3	-24.2	7290.2	5773.3	1345.2	471.1	10132.2	3017.2	6652.5	-14.3	932.6	-15.1
662.4	939	1411.6	632.1	89.9	23.8	9152.2	8801	-38.8	-10.5	1764.5	-19.8
-28.4	364.7	3409.7	4910.1	503.8	1763.4	12366	0	4584.7	78.4	1645.5	438.5
1124	567.2	109.2	2602.2	1973.1	-411.5	-14.5	0	4.7	-16.6	1153.1	-7.4
3866.1	-36.2	5885.2	-63	535.2	1232.5	5710	38.2	2614.9	-90.3	17.2	-5
1022.2	227.8	6379.7	8303.8	-379.2	618.1	6752.4	0	3621.1	-12.2	1737.8	-13.8
12.1	21.9	-21.5	4469.2	143.1	268.8	7904.7	12045.5	29.8	-56.2	800.7	81.2
-11.5	2536.3	9270.1	1450.5	1601.3	215.1	6151.6	0	42.2	33	766.2	25.2
1405.7	203.9	1150.8	-146.8	707.5	-1082	19.8	0	5990.9	14881.7	1014	34.9
-38	-31.2	6.9	3255.9	685.7	256.2	72.8	-34	6330	9.6	598	5.2
66.8	1318.2	-28.8	-227.2	2901.2	1030.2	312.6	0	1887.5	18.4	804.5	82
-358.5	6256.2	4831.2	8625	440.8	206.7	2194.5	-12.2	26.3	-22.5	1280.8	69.6
31.2	1428.1	-59.3	224.2	601.2	529.8	869.3	0	-12.5	-16.9	64.7	2.2
2217.6	2775	2898.6	231.3	695	-71.5	4.2	2618.2	7680.1	-58.2	1411.5	-70.3
1474.5	86	3604.8	-223.3	2229.1	1735.3	-10.3	534.1	3747.7	36.3	687.8	-13.8
385.8	50.6	-2.5	49	1526.3	347.5	-84.8	-5685	7.8	720	22.2	0
431.5	3317.6	1681.8	7563	3665.6	1982.8	720	-1162.5	2581.9	-84.2	2335.7	-12.1
118.2	716.6	2351.1	14378.9	387.1	-134.7	10485.9	-3915.9	3438.5	-25.7	906.8	-4.9
45.2	-17.2	687.8	10016.7	3059.8	1551	-18.2	49.2	-20.4	-27.2	223	9.8
676.4	-19	-24.9	4754.7	218	584.8	2454.9	5490.2	2760.8	-21.5	1726.1	66
1100.5	1429.5	2267.8	7334.5	-135.6	766.4	3076.5	412.2	5468.8	-55.3	813.9	1.4
2539.1	9.2		8537.9	2018.6	240.8	60.8	-60	2032.4	41.8	1248.9	434.9
-102.6	-18	58.1	6327.2	608.7	680.7	86.2	-9.4	3787.9	56.5	1921.2	-9.5
1583.8	428.7	4041.8	-375.5	572.7	530	6991.5	-2.2	29.5	52.8	1011.2	-13.1
3596.9	2849.4	4367.2	7216.5	-354.5	-635.7	8306.5	-40.5	1285.5	36.3	51.1	-1
2643.6	-43.2	3543.1	3682.7	2434.4	-126.9	63.7		7724.8	134.8	484.5	-19.7
379.4	-49.8	50.6	3607.5	1347.3	63.4	5378.5	3278.9	6729	198.6	1070.6	8.5
1410.6	314.3	5383.2	12442.7	-502.2	1558.2	8527.8	53.8	4626	-31.5	142.5	11.2
-55.2	18.9	41.5	338.6	926.2	972	6609.1	16.3	80.2	-44.4	342.5	-6.5
1420.6	-15	5622.8	8636.8	0.3	2692.8	2636.5	58.2	11310.2	-237.9	-48.1	-52.9
293.9	10.3	4664.4	9331.9	2543.9	-23.4	3050.6		3642.7	426.6	30.8	11.7
30.1	8.8	3779.8	2228.5	901.5	-190	2249.8	85.5	3125.9	-32.2	1559.2	-6.6
1714.3	792.2	5217.2	-15.7	1913	-238.8	8974.1	-28.5	3205.8	11.2	4235.8	11
84.5		5088	1202.3	1479.5	994.2	7666.5	-109.5	8851.1	-25.5	2058.2	-1.8
2986.8	6.8	2559	15003.8	-120.9	183.3	7620.9	789.2	2755	10.3	1740	-14.2
80.5	15.2	1908.8	62.1	561.8	250.8	10397.2	2.1	-12.4	-7.6	-26.7	-53.1
76.3	2822.1	-32.5	-212.2	6443.8	-398.2	2887.8	27.1	10071.8	-20.7	472.6	-3.5
500.5	2606.2	6085.5	4886.3	-196.8	164.8	6531.1	19.5	2177	123	882.8	6
65.7	-14.5	-38.5	80.6	2515.1	147.5	4721.1		3370.8	-33.5	884.5	-12.2
1009.6	6.6	3724.5	10961.8	654.5	1283.5	95.7	25.3	6970.4	31.2	440.8	1.2
786.5	1574.1	-200.7	2875.2	1214.8	-179.5	37.5	720.3	6363.3	59.8	1133.5	-17.7
800.5	869.5	23.2	2186.9	-736.5	112.9	6600	-679.4	2967.2	12.7	1591.5	-15.8
319.5	969.2	2931.5	279.5	-150.7	-381.9	8885.2	2043.6	5995.9	5.8	1707.6	-2.5
1867.8	0.1	597.2	323.7	26.6	-644.5	1910.2	271.5	14.9	-122.8	-8.8	26.6
-60.3	1036.5	4396.8	-153.7	26.2	-759.2	5916.1	157.2	1564.5	-524.8	1347.9	-1.5
-44.1	1529.8	5129.6	-72.2		265.3	10289.4	1417.7	3905	-4.9	-16.3	33.9
787.7	1689.7	6316	-106.5	3530.6	-309.5	-88.8	309.9	2782.4	-1121.8	467.9	7.9
476.8	1004.9	3906.2	11999.2	6944.1	638.1	4753.8	304.5	7293.2	1288.6	1729.9	5.8
439	-29.2	-154.8	-5.4	18904.5	1069.2	2437.2	293.5	11391.8	272.8	1520.5	-0.6
581.3	974.5	3421.5	3344	10028.7	8.2	14903.2	59.2	6649.7	-45	1322.5	-2.7
1022.6	1364.3	2951.8	1325.1	3429.7	-1369.2	8040.6	1721.2	6712.2	-72.8	-31.2	-9.8
9.4	33	-7.8	2542.5	-118.5	-1330.9	2555.5	631.3	2535.6	97.2	517.3	14.1
1292.8	-18.9	-51.5	-350	9780.3	-419	-103.2	840.5	4744.4	-35.8	995	6.6
841.5	708.1	5939.6	4663.4	2.9	1465.2	-76.2	554.6	-79.8	-2.5	8	-5.5
1058.7	18.4	4442.5	2879.8	595.7	-1050.7	19614	100.6	2936.4	5390.7	1305.9	-3.5
569.6	17.8	4504.4	3443.1	8238.3	-378.4	4903.1	48.5	-827.9	0	836.5	11.3
	-8.3	6260	46.2	1035	-0.1	1495.5	422.3	4250	30.5	1254.2	107.4
2640.5	28.4	3151.5	2500.2	3084.3	167.2	6631.1	685.5	4249.4	-23.7	18	-24.8
38	-2.3	4667.5	880.9	2526.3	1460.1	3050.2	679.5	7136.1	-46.8	709.5	1.9
33.7	28.8	5317.4	-58	2096.5	125.1	9505.7	1421.5	7096.5	-24.8	71.8	56.5
-37.2	761.5	3960.4	64.2	15.5	105.3	-0.2	1122.2	5707.5	310	-20.5	26.7
-2.5	-13.5	5273.8	2388.2	2529.6	676	2247.6	231.8	4409.5	88.2	0	11.4
-15.7	20.9	3144.8	5.9	-1.1	-565.1	6409.4	0.5	2718	-17.6	2386.2	21.3
13	2.8	5446.2	10.9	6789.3	447.2	6796.3		-23.2	-153.4	118.4	-8.3
3840.8	27.5	5348.7	-23.6	18.5	21.6	53.1	14.6	8725.9	-61.7	1660.3	23.5
-15.5	20.2	6078.1	18	7.7	172.4	-102.4	-72.8	4856.5	-7	-5.8	-20.5
0.4	69.4	3166.5	-27.4	18.8	71	27.2	11.5	4535.8	7.3	2299.5	107.3
4055.4	769.5	3936.4		2038	-533.2	5981.5	-1	1867.3	5.8	4.2	4.2
270.2	908.2	15.4	9.6	11.7	-41.3	874.1	925.5	3104.1	41	32.9	2.7
29.6	-18.5	7.4	-38.2	-18.6	-148.6	904	-321.2	5895.8	-0.3	2617.4	2.3
-8.3	13	32.2	-15.5	4.2	338.5	52.6	124.3	5728.5	-11.2	635.9	134.5
-43.6	1069.2	2783.2	-2.7	1100.5	212.4	3740.8	-16.5	7409.8	121.2	-12.8	88.4
-42.2	20	2981.5	2009.6	19.9	76.2	-38.2	-14.8	4054.6	-23.1	1369.4	14.5
34.8	3183.8	76.9	-8.2	1106.2	518	-173.2	111.6	5436.2	773.6	93.3	-2.4
47.3	23.2	5732.6	-14.8	2835	7.3	40.8	-43.3	-13.8	-79.7	-10.5	7.3
2668.5	22.2	3124.8	1417.2	-13.2	1363.2	12131.6	15.8	2238.5	-3.2	684.8	13.2
29.5	3850.8	-6	885.8	2590.6	315.5	12072.1	2843.8	8316.5	1.8	-135.2	5
-8.3	-14.2	2575.3	2179.3	3406.6	1332	-17.8	-5.9	48	-42.8	1426.5	-8.7
-13.4	5008.3	3384.1	441.8	1878.2	-707.7	1862.8	146.8	3874.2	17.5	1063.7	65.8
802.1	3272.7	2340.2	-16.5	1377	18.1	-56.8	24.6	9229.9	13.7	84.2	154.2
45.3	451.3	13.8	1005.2	3608.8	161	2660.7	19.9	7252.5	-8.4	2461.3	116.2
335.3	-15.7	5812.8	2048.2	1804.7	-77.1	123.2	-5.3	6646.5	3.1	1858.2	7.6
-23.9	5036.2	1300.5	223.9	2554.7	-396.3	11152.6	30.2	5776.6	19	1799.8	128.1
3519.6	2650.1	1472.2	16.1	2048.2	659.2	60.2	1.6	4374	-56.6	3835.8	-17.6
855.1	-26.4	-285.8	-268	20.2	567.5	17	7.9	5168.6	-22.6	-26.7	-5.1
1130.8	1947	14342.4	272.2	3071.8	491.2	3214	-79.5	4741.6	-479	977	14.5
-11.8	1784.7	-11.8	997.3	2644.3	104.8	23.8	14.5	5204.5	-0.8	1920.6	1.3
-23.2	2556.5	1442.2	834.8	2464.5	-350.7	7.8	1729.8	8716.9	18.7	1648.5	8.6
181.6	-42	5870.9	2083.1	2413.9	-356.1	2080.1	37.5	248	-24.2	1815.2	-5
45.4	1112.7	2055.7	16.5	2304.2	192	-11.5	7.2	-802.1	10.1	939.7	-6.8
45.6	37.4	2055.1	833.5	788.2	-95.5	-22	-63	5844.7	20.9	-143.2	5.2
732.2		2814.7	-14.5	3346	768.7	-8.3	-11.8	2834.5	-31.8	1554.4	-87.5
28.2	1700.6	41.9	4.2	104.2	118.9	-37.1	-7.2	-16.1	-0.2	43.6	-9.8
2.2	503.2	1855.8	7.2	2859.8	1030.6	10121.3	-0.3	1895	-7.6	241.4	-25.5
-9.5	3182.6	2389.3	-23.5	2346.5	-787.8	8154.2	-15.4	3577.4	14.1	2010.6	42.1
56.8	122.7	9195.2	130.2	1897	-54.2	3452.5	-9	6815.5	96.9	960.2	15.5
11.8	1968	1388	7.8	-10.5	-121.2	2685.8	-12.4	7119.8	-25.3	1709.7	140.5
-10.6	1915.8	2227.1	3824.5	-9	-1003.2	4505.8	19.1	4791.6	30.5	1970.7	-16.3
-6.5	270.2	2045.2	58.7	2078.6	88.3	8696.4		226.2	-17.3	-0.6	4.3
620.5	-345.8	134.9	-225.3	2395.2		11873.9	16.1	7573.5	-1.6	2721.1	1.6
1075.7	-847.3	4178.3	1558.2	1754.8	22.7	-83.2	114.2	3637.4	80.7	36.9	300.2
2043.2	925.3	1775	-184.8	3097.1	291.2	-93.8	29	3.6	-8.5	1430.3	22.5
3.3	-45	4413.3	-4	-33.5	628.8	7284.5	-54.8	3045.3	18.2	2225.9	2.6
3538.1	-13.8	3601.2	893.3	988.3	3584.3	3430.8	-33.9	5548.4	117.3	3250.7	1.2
1296.1	191	5.2	1956	15.3	-8.2	15.2	-29.8	-14.1	102.2	2642	38.3
727.7	1309.1	2660.2	2146	2178.5	96	4104.8	-11.8	1969.7	-8.7	-232	44.8
1398.3	356.5	3746.1	110.4	1996.4	1.5	-64.2	934.9	2107.7	-17.3	1257.3	2.6
2621.3	-349.4	3645.8	10.2	2683.9	-22.3	5314.5	737.5	4485.2	-30.8	1707.3	-173.3
-3	293.2	1777.9	-13.2	2242.3	520.1	-24.4	277.1	7751.8	-1.1	3668.4	-48.1
4.2	398.5	-33.5	57.6	685.5	19.3	5077.3	4.8	2823.3	6.7	1873	48
-12.8	1479.7	1753.8	13.3	2428.1	-26.5	-141.6	-9.2	28.2	56.5	1481.7	39
1030.9	411.6	4193.7	-92.4	-2.9	97.6	7002.3	2899.6	5186.3	24.6	-9.3	183.8
5005.1	-593.5	1360.6	1652.8	2347.2	48.2	2321.2	146	2636.8	29.1	3187.5	436.2
2067	639.3	4837.8	-8.5	818.2	4963.5	4.9	-25	2137.5	6.6	1751.9	0.7
2618.8	-83.8	2085.3	3675.7	668.9	-132.8	7850.8	1965.5	6428.8	-26.6	2514.7	0.3
1373	271.3	17654.2	739.5	2681	-14.8		12.9	7861.3	-15.1	-163.5	-33.6
37.5	53	7145.7	4520.1	3386.3	-0.9	0.3	-11.8	-39.7	-0.8	6536.4	128.4
230.2	1506.6	2809.5	-11.1	2117.5	7.3	5328.1	-453.8	64.5	-23.3	730.6	12.1
7468.8	211.6	84.2	2637.9	-11.6	15.7	3255.8	20.1	5660.5	19.5	-2.5	91.8
13.1	1807	1834.3	1478.8	2797.2	10.3	-8.4	208	5204.4	-27.1	2101	417.6
4858.5	3693.8	5247.2	813.4	0.2	-5.7	8354.2	-11.3	2148.8	23.5	6361.7	5.2
885.2	292.2	3915.7	1326.8	1032.5	-19.4	2971.2	-24.1	5163	2	648.1	3.7
-20.2	-646.3	3852.8	905.2	29.3	-19.3	6707.7	1532.6	7079.1	-1.8	47.7	-24.3
62.5	144.5	7384.6	664.6	2794.2	-23.7	3996.8	34.2	1798.5	8.1	3407.4	-6
30.4	-57.3	3534.8	2020.5	3129.3	55.2	6246.8	274.5	-120.1	18.5	3111.9	322.2
782.3	2507.5	5704.5	-62.2	2293.2	5.2	3328.9	29.7	2498.5	3.6	1944.3	29.8
474.2	-928.9	3786.9	-93.3	2176.5	31.9	11583.8	3.8	1912.5	-5.2	5002.5	52.1
193.7	883.9	46.7	3.5	1627	-2.1	0.2	-4.7	-68	42.1	1705	18
-28.7	243.2	-66.2	585.8	1499.3	-39.6	5222.5	-34.2	-16.3	20.8	1153.1	-1.9
3108.8	3750.6	1888.6	700.2	21.4	-12.8	4696.6	1203.9	-1.5	-19.5	2809.2	-15.3
-77.2	642.3	2097.1	1065.2	15	25.8	4836.5	-10.2	8365.7	-1.9	1089.8	-24.2
-45.4	876.5	3672	1568.4	1575.3	6.5	-44	-19.7	3318.3	14	963	0.1
2848.8	-222.3	8060.2	-3	3311.2	1.1	4296.2	4.3	-37.2	30.9	1558.7	13.4
1008.3	373.9	14.8	-1561.5	2333.8	10.8	3986.7	9.5	-58.8	8	875.4	-3.6
134.4		2541.8	2053.2	1484.7	24.5	5714.2	74.2	-26.3	59.3	8.4	18.8
3327.9	-9.8	4534	93.4	294.9	2531.9	3975.7	1169.9	4319.5	-21.9	3905.8	182.8
4813.4	22.4	3441.4	2016.3	20.8	21.6	2968.4	38.1	-7.8	-13.4	3882.8	34.7
-10.7	-36.5	1803.5	6.5	-20.5	-7	6543.2	-28.5	-303.2	10.3	5447.9	9.1
1327	13539.6	4165	181.5	-8	36.8	3628.1	1.9	1226	40.7	888.8	4.2
2703.7	59.9	2485.5	1853.2	192.7	3.6	14.3	15.2	-71.3	-21.8	3266.6	12.1
-34.8	-106.8	3093.6	2677.5	4409.2	-175.7	3067.7	-6.3	4894.8	43.5	2961.5	-20.6
2870.5	3006.2	-27.3	822.7	16.2	-14	3525.6	76.2	4789.4	-1.2	-12.2	9
2295.8	-154.5	-72	-25.2	-14.2	-17.6	4340.6	4.1	4249.5	7.5	5.2	-21.8
2603.8	-55.4	16.8	291.4	246.8	394.2	-43.3	8.4	1760.8	1.2	37.8	-8.5
1401.5	123.2	5740	1230.1	12.8	2.5	119.3	4.2	-91.4	28.2	3192.1	237.5
-13.1	-7.2	6144.7	1938.8	3001.2	39.1	5078.5	2.3	2336.2	-10.8	2727.4	71.7
-157.7	-3.4	3535.6	8.7	10.4	5.4	3287.8	-0.1	519.1	-16	11.5	-3
1	7122.7	5150.5	1379.4	81.4	88.9	2225.8	-9.2	36.2	7.8	1116.2	-15.2
-14.3	11407	3322.5	38.5	2.8	1.6	254.9	-29.4	-5.3	0.8	1119.3	-1
207.8	2056.9	3114.8	1823.6	1095.4	1.1	4730.3	8	71.9	-0.8	41.4	-17.3
1975.1	5414.5	2930	-0.6	542.8	9	3526.7	28.7	464.7	-31.4	-7.5	-34.8
499.8	46.8	1843	-14.2	226.8	-37.4	-5.2	12.5	9533.5	-6.3	1042.5	1.6
-32.5	10889.7	2365.7	-800.5	979.2	-8.8	3188.5	-25.3	41.9	-8.5	-9.5	194.9
2373.3	12030	4069.4	-3.8	411.2	2.8	3901.5	54	2615.8	20.5	1929.4	103.4
1051	-42.4	3468.8	2851.2	2123.8	12.8	4823.8	6.2	4217.8	9.9	-0.8	-10.8
3471.7	10063.9	2726	271.9	3748.2	4.2	3469.1	11.5	-9.5	6.4	1827.7	16.8
-260.1	11432.2	13.5	566.2	2985.7	48.8	4411.4	-24.8	6407.1	8.2	1181.2	70.3
1254.5	-131.5	-30.2	-6.1	2271.9	-14.4	1615.9	13.9	570.5	44.1	3494.7	3104.6
4527.4	26.2	2055.8	3363	1433.3	-4.9	2592.1	43.6	-3.5	5.5	2046.6	71.2
4481.7	7370.2	6006.6	-147.6	2885.8	-23.2	2296.5	-19.7		-7	9.7	8.5
-94.1	10174.7	7975.5	1049	1639.7	26.5	4044.1	-29.9	1527.2	-7.6	1438.6	-36.6
-2.3	4679.3	2983.8	35.1	1698.9	-14	-2.8	-12.2	1683.4	0	1320.9	-32
647.1	9356.4	3529.2	347.8	2481.5	-2.7	1485.2	-27.3	2646.2	0.2	1444.6	-55.1
834.1	10237	9.5	-22.9	1197	67.5	163.6	-14.5	2767.2	18.2	2403.3	112.2
4391.9	10138.4	2605.9	-15.7	1771	6.3	13362.5	8.8	63.3	7	7.1	1.5
2275.8	14285.8	2593.2	732.6	1176	3.8	4979.2	-9.1	1738.5	84.8	-9	-16.3
2138.5	4268	1114.4	605.8	1001	85.9	-42.8	-35.6	1745.1	40.8	-2.6	47.4
670.7	12319.5	2842.3	404.4	11.3	-8.5	-109.3	27.1	1197.9	-426.8	959.5	13.8
3920	-22.2	1822.7	17.5	4007.2	-12.3	-39.3	-26	4533.5	6.2	-13.6	-4.4
1665.4	-174.1	3383.7	-724.1	2334.2	-13.5	2919.4	31.7	1615.5	-93.1	0	-53.1
431.8	11895.1	4119.7	1735.8	1746.3	-6.8	8630.1	10.1	-197.7	1.1	3199.2	-12.8
-2.6	-163.5	4425.1	2051.7	700.9	34.3	2492.4	14.7	2377.7	37.2	92.7	-23.8
1051.2	6884.5	2773.3	421.2	994.1	0.3	3616.4	-38.9	1011.5	-26.9	14.8	17.1
19.2	3199.2	7397.7	-307.5	2441.8	179.1	3813.3	-10.1	-22.3	-2.9	-12.3	-18
37.7	20884	2795.1	-247.5	1017.3	-0.5	5120.1	-19.2	-441.4	-26.8	726.4	26.2
621.5	1.9	4559.8	2848.4	3711.9	9.7	2042.7	14.5	3.1	-71	-22.8	6.2
1555.1	880.5	2870.5	775.8	3893.8	-5.8	2476.1	0.6	5988.5	29.3	11366.8	-18
-50	3397.5	3168.2	1082.2	1386.2	-9.3	-470.8	-1.6	9358	-11.2	-20.2	-1.2
740.2	1410.9	5236.5	1898.2	4145	0.8	3790.7	60.4	214.1	9.8	30.6	-37
5.5	4405.3	2548.8	1690.9	1564.5	-15.2	2880.3	18.8	4980.1	-1.1	9989.4	565.8
785.4	7521.7	13.9	-6.8	74.6	-16.7	25.2	-41.8	3584.8	-82	-24.1	15.1
187.5	2384.8	2653.8	1879.2	1409.4	754.1	4668.5	6.5	3598.7	19.8	38.5	-1.9
623.6	1020.5	2848.5	101.3	4519.5	3.1	1448.8	-35.8	1214.5	833.1	3356.3	-20.8
-15.8	-15.8	4209.5	1819.9	2706.6	17.9	-83.2	10.8	7.5	-8.3	3495.8	22.8
-19.4	3635.2	3693.4	-406.4	1922.8	58.2	3894.2	26.8	-20.5	9.8	-75.2	4.8
3.5	17035.2	2141.7	-7.5	968.8	15.2	2384.4	102.8	2753.2	106.5	68.5	11.2
3.2	552.4	2551.3	-73.2	1293.7	-1.8	100.1	15	2204	-41.5	3442.1	-12.1
1125.1	11067.9	3929.8	1953.3	796.8	22.7	4852.2	40.5	4794.2	5.5	4865.4	-6
282.5		3033.5	1260	1766.8	-2.5	18671.7	6.6	2085.5	-90	4193.5	-24
17.1	62.2	2311.9	721.8	2650.8	-9	3706.2	14.8	320.5	-8.7	5554.5	-1.1
-6.9	-122.5	3019.5	197.5	893.1	13.6	3549.6	-5.3	4229.7	20.8	3025.2	1.8
367	200.3	2572.8	8.2	1122.8	-1.3	-94.7	-18.8		-9.5	3188.8	-3
-3.6	5567.3	-7.2	98.7	3020.2	-2	4112.2	-40.3	10470	41	-13.8	-15.4
22.6	1181.3	2108.8	688.7	1454.5	-10.9	4831.5	-11.5	7844.3	42.4	3532.6	18.3
962	2572.9	3286.9	1663.2	4189.7	7.2	9437.8	19.8	190.8	422.7	84.2	2.8
-5.8	3026.8	2984.8	1165.5	2340	0.5	5441.7	29.2	6104.5	-31.9	-2.3	58.2
28.1	854.5	7.2	1901.2	4995.5	-0.9	3839.6	-5.5	-22.3	-3.7	2620.6	25.8
-25.1	3118.6	27.5	-1518.1	1563.3	-1	3459.4	2.6	3839.2	-41.5	9936.5	36.2
7.4	1244.9	-15	57.9	-27.9	2.8	3516.4	12.8	7	-561.8	5996.7	-33.2
34.8	-136.6	4301.5	-149.6	2825.2	-4.1	526.5	-20.8	2409.5	-28.5	51	56.2
582.8	583.1	1733.2	2202.6	20.5	20.7	13779.3	-17.5	-4.8	-79.8	4901.9	-9.4
	3032.5	10.9	951.4	2002.7	9.4	-30.8	52	4603.8	-26.2	207.9	-45.1
1599.5	2629.2	2869.3	1064.7	1573.8	-16.5	5546.2	52.9	5693.1	13.1	5031.9	-12.6
3.7	-89.2	2441.9	-31.6	894	-20.5	1849.9	-16.8	49	-8.8	5486.2	29.8
1748.8	2592.5	4935.3	1291.2		5.6	3347.1	-6.2	1495	-42.9	2741.8	38.6
1375.2	1890.2	2427.4	-325	8.2	8.6	5893.3	-4.7	1131.7	636.1	4529	0
1628	2103	3197.7	323.8	691.5	24.2	5648.9	0.3	433.2	-0.6	3953	30.2
1685.2	-43.8	4.6	950.3	1001.5	9.5	4399.5	83.3	1089.2	192.8	3270.4	-119.5
1069.2	4208.7	-9.2	75.6	848.6	1.9	5558.1	-3.5	8196.8	2431.9	35.5	4
1525.9	139.8	13.3	80.5	1320.3	-16.7	2488.3	-7.7	-8.4	230.7	-21.6	741.4
4059.6	1961.8	-3.2	457.7	845.5	-24.6	3017.8	100.3	-925.4	4.1	8707.3	27.8
2073.9	561.9	3.1	22.5	4357.8	23.8	5362.5	8.5	6937.7	134.8	7332.7	1131.9
1879.5	1931.5	1889.4	961.7	834.7	1.4	3607.2	4.2	12803.8	-26.2	-1.6	-188.5
2462.5	4497.5	2842.8	1413.1	15.8	22.2	246.4	179.4	6785.1	-63.4	821.2	46.8
1996.1	2635	11.5	119.3	303.9	-12.5	13602.7	-17	-29.6	-30.2	-25.4	3.9
2193.2	1086.5	1786.2	710.2	2387	7	4043.5	236.3	1898.6	55.2	17.5	59.1
2740.4	16.3		1364.6	1551.6	4.1	-52.5	-39	6931.5	-4	3822.5	550.9
1497.6	2648	4356.9	342	26.8	-2.5	7684	-8.1	446.2	-35.5	4697.2	-1365.5
2608.7	-21.5	97.8	2107.6	1517.2	-2.2	7499.1	38.3	4076.1	-48.8	5454.8	231.5
3660.1	1822.2	4122.2	586.5	1531.6	13.2	-8.5	2343.2	3685.6	-198.3	-25.9	114.6
2365.5	2827.8	7345.8	-76.2	-4.6	11.7	5025.5	-13.1	6267.8	136.5	10.8	4.4
-9.5	5509.3	85	859.2	1162.3	-21.5	-93.2	-67.2	2321.8	314.1	-25
-11.8	1070.2	107.2	2.1	1177.3	8.5	3966.2	17.1	50.9	10.4	-51.7
4164.9	34.5	32.4	427.2	1326.9	21.9	-30.4	-25.3	27.1	382.5	16.8
1527.7	5312.5	40	1374.5	2291.9	29.8	3835.5	-154.2	8323.4	-29.7	5189.8
2166.2	3302	27.6	2033.8	1491.8	34.8	3669.3	1040.7	3062.6	25.4	125.8
1769.6	1442.1	148.2	-10.6	4066.6	33.3	4.7	-54.9	-50.8	23.5	-0.4
1514.4	-1.4	21.2	343	3547.8	11	1651.3	11.6	1383.2	-60.6	4907.8
2128.7	16.4	45.9	1002.5	984.5	7.8	5193.8	-16.7	-10.1	-19.8	935.4
7.4	5923.8	11	2184.2	2093.5	33.9	1314	57.7	100.4	0.7	-4.1
2311.8	1479.5	98	2392.1	1543.5	20.7	36.1	38.3	1763.7	-54.5	3.7
14.9	2.8	5472.3	-39.4	5346.8	8.3	7886.2	38	166.7	2727	8767
8.9	8899.2	241.9	1552.2	962.8	9.9	13149.5	-25.7	2158.2	-33.2	30.2
1539.1	3012.5	361.8	642.8	3679.8	9	579	405.2	-18.8	11932.7	2675.5
1431.7	4704.9	-39.2	68.6	1586.8	-3.7	12759.6		20.5	16.7	6
-20.6	7297	9283.8	-14.2	400.2	9.1	-22.2		4478.7	6.7	3817.8
6.5	7409.3	-26.5	475.8	718.5	51.1	-985.6		137.6	0	1633.1
2737.2	180.5	8507.3	-14.9	3656.1	-31.8	-58.5		-38.9	5	-19.9
2436.4	974.5	115.5	572.2	2690	-13.5	-85.9		40.6	95.5	-36.8
1841.6	27.5	3809.6	25.5	7.1	-4.3	3647.7		1531.2	16.1	4499.5
3655.9	4118.2	-153.2	2200.6	3914.1	8.4	5517.1		23	-10.5	3842.5
8159	3329.2	370.1	2623.3	1781.9	-3.8	4000.6		30	201.2	1173.8
3398.5	2413.5	-4.8	-16.3	1690.8	31.4	10596.9		212.7	60.1	87.8
3838	3002.2	81.8	1134.5	3606	19.8	6484.3		4451.2	-49.2	5827.9
2213.6	5702.6	5015.4	-7.6	1829.5	-0.5	-176.9		2942.6	1283	1350.4
702.4	5539.6	2634.3	960.8	20.2	-13.8	7771		2342	0	-24.4
2774.7	4013.5	7089.8	8	1156.8	2217.9	4936.3		39.6	66.7	5581.1
1626.5	5754.8	4307.8	18.7	-7.8	-9.6	6861.7		2885.9	817	11.3
1256	5.7	4110.5	0.8	1465.2	-16.8	10447.5		6189.5	63.9	5758.3
1081.1	8170.2	4104.5	-3.2	-12.1	-199.3	3352.6		752.7	-5.9	1277.4
1822.5	-18.2	7199.6	6.5	1180.4	44.4	4013.5		62.9	-59.3	3816.3
1246.2	-34.1	2504.5	4.9	1110.8	-87.8	20.6		5.8	-30.8	845
23.3	7791	-156.2	-3.5	776.8	205.3	2158		-83.9	26.9	4305
3295.2	4232.4	-5	28.1	2216.5	191.9	2386.6		3080.5	-23.8	3412.8
7375.1		-256	673.2	2.2	415.3	1608.1		3617.2	-1.5	54.3
1908.5	3.5	4103.5	-0.3		16.2	2364.2		6660.7	-12.2	90.9
2028.8	2877.5	3536.2	558.8	8856	1142.6	-3.6		-49.4	-21.1	236.6
2196.6	-27.2	-35.1	109.5	17.8	-26.5	-133.2		4554.5	21.8	7271.8
2305.2	7681.3	3920	743.2	2686.2	210.2	137.2		1667.6	83.5	6389.6
2489.5	5.1		2913.4	-36.2	256.8	5312.5		5448.9	-36.2	4195.6
944.2	-5.4	8805.2	7.5	4996.9	-4.1	2051.5		4817.1	-66.8	1397.8
3411.7	-34.8	14465	6.2	10.5	-15	6970.5		7432.8	5.5	101.7
1386.6	3.2	-385.8	-14	-61.8	-14.5	5469.5		-53.5	436.5	6145.2
2265.2	2991.5	8872	-1.2	5216.6	-21.8	4699.9		2698.2	-14.8	-22.2
-4	1114.8	14011.9	18.2	-53.1	1061.6	0.8		5189	473.2	91.2
3084.5	-48.2	846.1	24.2	2517.5	901.9	1827.9		62.4	243.3	5491.3
352.8	187.8	22539.5	8	4973.5	47.2	-13.3		7756.1	9.8	3923.7
1462.4	4936.3	9255.8	4.4	1609.6	27.2	8170.5		4118.5	2183.1	-9.2
-2.6	-37.3	18764.2	1228	161.4	-18.9	1736.8		81.8	-335.5	2752.9
15.6	7718.9	31540.5	4.1	20.1	1052.4	17.5		1444.7	-11.8	6.7
3032.5	4759.3	11979.5	16.5	1020.1	-38.5	43		76.9	1579.9	-4.8
-6.8	3864.4	11730.9	7.5	4681.4	19.6	11681.1		4181.1	-10.2	8143.7
43.8	35.4	9603.8	3.5	3781.8	62.8	5421.7		593.2	1123.3	8119.2
-24.2	-5.5	11479.2	-12.2	1199.2	754.1	7626.5		4	1.2	6717.3
1416.1	2149.6	8022	-123.8	-31.9	1737.6	11136.5		15.3	121.9	3387.1
64.8	-1.8	15132.5	-13.5	-196.5	2446.7	-391.8		5.8	201.5	5145.6
16.4	-3.4	13855	11.5	4162.1	6.7	0		3082.3	-229.3	5310.7
31.2	3149.2	12079.8	3.1	2343	-91.2	-41		-67.8	152.2	4960.4
-35.5	5186.7	15534.2		1872.5	24.4	8244.7		3.4	-166.2	3551.1
16	8205	10646	1602.1	-374.1	254.8	1106.2		0.7	-32.3	7070.7
1512.4	8.5	12910.8	7.8	4194	-18.8	4005.5		7752.9	-473.6	5.2
4.8	8810.8	5365.6	3142.2	2087.5	1362.5	5925.4		-25.2	-58.9	2578.4
37.7	1428.5	43.2	26.5	465.8	-64.1	1365.9		3.3	118.8	1894.1
-18.6	1093.2	-62.4	-207.7	945.1	2039.7	9780.5		20.2	-10.2	1255.6
44.4	5	5607.5	4679	2413.8	970.5	8790.5		10135.5	1.7	6089.5
2829.3	9550.8	-1037.6	-37.7	2652.2	-51.4	0		-10.8	30.9	3392.1
-21.8	3978.5	6912.4	1031.1	1223.2	788.5	0		2215.3	-28.7	2860.4
-1.5	-6.3	-179.8	-27.9	2119.2	250.6	0		3253.3	623.4	6020.5
2544.5	-45.5	113.2	-18.4	2014.5	-28.2	3047		-16.3	-1.8	4133.2
23.1	3295.9	166.1	4018.5	1653.1	-72.1	4097.1		1902.2	2.5	1807.2
-8.2	6011.6	10785.9	6244.2	2145.8	970.8	2619.9		48.8	-9.7	5617.6
1984.4	3562.7	6563.9	22.1	2481.7	1526.8	0		-151	6	4485.1
22.8	12998.6	2233	9.3	1852.5	769.1	2614.2		7176.8	-20.7	44.1
58.5	1100.2	3692.2	3773.5	2462.8	460.7	17655.3		2849.2	139.5	4818.6
9.7	8983	4395.6	-47.2	4021	97.7	8233.2		7544.1	-3.9	-30.9
25.1	1185.8	-289.7	-15.3	2543.7	4555	0		10267.7	16.2	-11.1
6.5	1272.9	16889.7	183.4	1868.9	9.6	724.5		2448	17.4	7122.5
16.1	0.1	1452.5	-4.2	3843.5	72.7	3512.2		8371.9	9.8	5279.9
2226.5	1488.8	5299.1	29.9	2000.8	-24.1	885.2		-7.2	-57.9	-22.1
3157.9	6210.5	10018.7	207	1390.8	21.8	0		9630.8	-3.8	30.7
13.8	521.1	230.5	9750.4	2504.7	-238.8	-2436.2		22.5	124.5	936.8
1599	1694	3442.8	3158.5	54.5	-32.1	0		8571.3	2.3	-9.2
-35.7	859.8	75.2	574.8	1874.2		9984.8		83.2	-18.9	8.3
8891.2	3348.2	15493.3	-24.5	1710.5	5.4	11640.9		10.6	-32	-26.3
1.5	1703.5	-277.4	1277.6	2426	-7.2	13352.7		26219.8	-30.5	1335.2
-80.5	34.8	10473.9	-98.1	2729.7	20.3	6499.1		4919.5	19.9	1408.7
3.2	2437.3	8154.2	-14.5	1131	6.8	141.8		11538	-18.3	0.2
1387.8	-12.9	18439.2	3757.9	3376.1	-4.2	2952.8		30.8	24.2	3226.9
-62.2	8535.5	2819.6	-26.2	2734.4	-32.1	-12920.6		-25.1	-10.3	71.1
958.8	-4.7	6186.8	11	955.8	-10.1	8318.7		16.2	0.1	78.2
4007.8	2794.6	15938.5		1097.5	18.2	2194.5		-84.5	10.8	4471.5
3143.6	3190.8	10797.6	90	1515.9	-4.8	1083.2		3531.1	22.9	3662.1
4070.6	-31.6	12347.2	12802.3	1458.8	9.6	7864.4		10553.6	4760.2	11.4
4989.5	-9.8	-160.4	-307.2	316.6	-1.9	4998.5		6508.1	-1.9	-29.7
2631.3	-6.1	9255	7262.1	1376.3	-22.7	5800.5		5870.5	204.2	1308.5
1752.5	-1.2	82.7	5585.1	2921.9	9.4	6747.2		91.5	1.2	-31.2
54.7	-611.2	12397	5520.9	2211.5	5.7	3422.9		3106.4	-48.2	3
-20.3	138.3	5833.2	1109.6	2894.5	5	4825.4		23506.8	-50.4	-38.4
5.2	2326.5	-1.2	3276.4	1827.2	-18.8	3322		16747.2	-12.6	4608.5
23.2	3809.2		-1904.5	3757.8	-11.9	7696.2		4637.3	1308.2	3772.9
-5.4		4573.8	8984.3	564.2	-12.7	5876.2		-34.5	-14.2	55.2
53.2		5745.8	9516.2	55.6	-5.1	5478		-17.7	-64.6	-6.5
487.1		6038.2	3491.8	1132.2	-18.8	-1149.6		3819.7	-5	92.5
		6059.5	-264.6	1872.3	9.2	1915		16719.5	-2.3	-9.7
2866.3		3764.4	7625.5	2127.2	7.8	3035.3		3621.8	6.2	-14.7
-3.9		5193.2	43.2	1553.2	0.9	8610.5		-4.7	859.4	313.9
582.8		4585.8	9082.2	1157.2	1545.7	6408.7		4543.8	-39.7	-27.5
334		5224.9	6578.2	2012.5	15.6	9857.5		6494.5	-8.5	3193
1040.6		7415.9	-1.2	1455.2	11	-15.4		-37.8	-28.1	2512.2
1667.1		4852.4	-142.5	78.5	-5.2	-438.3		10215.3	22.8	5744.5
-128.8		6197.5	13423.8	-59.2	36.2	84.7		4744.5	-2.8	2266.6
-431.4		33.7	-40.5	1804.2	18.8	7978.7		3239.6	-20.8	-11.9
122.2		3478.1	8.8	1429.8	-3.8	1051		-64.6	15	747.3
11.7		5430	467.3	9655.9	33.8	4691.6		3491.7	-198.8	-48
-189.8		-64	17.8	1507.2	55.2	2838.2		5315	-163.5	-17.8
2236.8		40.7	86.7	2288.9	1739.2	10228.2		-26.2	702.1	58.8
1782		5102.6	-39.6	1589	-36.1	-162.5		1474.8	-12	39.9
2479.8		11904	-42.2	1387.7	2069	6048.7		10148.7	64.2	3404.7
-1607.2		5660	2581	1843	136.6	3856.9		-11.8	3.3	-13
1305		4209.8	479.3	2018.3	434.3	81.5		11897.4	-15.6	1094.5
317.1		3889.8	21.6	-8.9	4.7	9		11.3	425.1	-30.7
-140.2		8426.2	1196.1	1445.8	14.8	-774.6		6711.3	-61.8	2488.2
-151.8		2.6	-281	1171.1	11.5	7146.1		9802.6	747.4	2233.2
3828.5		4939.4	-309.1	714.7	-166.1	-512.5		-34	375.3	20.4
238.1		7891.8	17271.5	-7.3	37.1	1902.8		12095.5	-41.4	24.9
582.6		4262.3	10693	1420.8	465.5	3523.4		5	-29.5	46.6
-172.4		3096	-1528.7	18.2	1847.9	64		7250.2	-6.3	-53.1
3659.1		4002.5	6204	1248.8	5.2	6.6		-2.2	-5.3	127.3
-8.8		5787.5	7195.2	12.6	3539.4	-362.5		-65.5	885.3	2888.8
-201.9		4729.1	8331.2	1166.2	-5.8	3838.5		-89.7	16.3	2115.8
142.9		4524.2	12401.9	2498	6.2	6490.7		41.4	-14.4	-27.5
-34.6		3777	8343		3303.7	5138.5		29.9	-33.5	2534.8
1541.9		5041	13.8	292.5	-1.6	4230.7		58.5	314.9	-7.5
234.2		8047.8	4652.8	1124.3	-11.5	5119.2		2.8	-10.2	-52.8
309.5		3.9	-114.4	-113.5	176.5	2970.2		14147.1	-3.2	8.9
949.5		6413.5	-117.2	1013.3	6.2	7487.9		3815.5	25.9	65.5
1934.1		5949.2	10258.2	199.7	-0.6	5047.2		5423.1	66	2548.2
1513.4		4475.5	6186.2	-50.9	0	6412		3281.3	-55.6	3630.3
-1573		2566.9	5300.8	333.5	-31.6	5741		-2.9	-49.2	2136.3
966.3		7963	5891.5	1212.5	575.8	2720		4835	-77	3300
821.8		3951.8	6333.9	945.1	-17.4	8156.1		2973.3	-4.5	7.5
-311.1		4242.6	6669.8	2257.6	-11.8	120.6		-97.1	442.7	2380.6
911.1		3601.3	6774.8	8525.2	10	5448.5		3700.4	152.7	4467.9
226.9		5370	201.9	664.7	-3	11263.4		2421.2	86.9	-1
73.2		3135.5	13397.6	558.8	-9.2	1713.3		3075.9	-1.7	1.2
246.1		5945.5	5744.3	5997.7	21.8	-58.5		5148.5	3.8	2938.4
-72.9		6033.8	-1384.2	1089.5	-18.4	7537.2		3780.4	-18.2	2.6
-1515.5		4035.8	10358.3	-1278.2	25.9	2870.7		-18.2	5.8	-6.2
-348.9		3999.2	11064	2839.3	4.8	3057.2		1790.2	9.5	-27.2
471.8		5240.1	779.2	-2146.5	12.4	6826.9		1119.8	-46.2	87
944.2		6243.4	3456	266.7	9.9	4467.9		2207.5	-18.6	9.9
1520		5770.1	7800.8	4743.5	0.9	5224.7		17.2	-38.9	127.9
567.6		-20.2	5381.8	78.4	32.6	1145.6		1814.4	26.1	2426.2
2895.5		11231.7	10035.2	1742.2	-3.7	3956.5		2119.3	-28.5	1676
2061.3		3180.8	11976.5	249.8	1.5	-88.5		1965.6	21.6	5746.5
		3375.8	3452.7	2679.9	4.1	642.9		6116.5	-26.2	10.6
2864.2		4162.8	3382.3	5534.4	-14.2	-97.8		3758.9	-7.2	6304.7
3500.4		5959.8			7	2458.8			0.2	4037.8
6391.1		4174.2	593.4	1711.8	-0.1	2214.8		2122.1	-33.3	4960.8
1758.3		-4.9	1207.5	440.2	-10.5	3031.3		5001.7	3.8	3305
9361.9		7068.1	4771.7	-46.8	-8.9	5083.8		-42.8	1155.5	-16.6
-26.2		5026.2	1800.6	2318.2	2.3	564.7		3390	53	-12.5
5287.8		29.4	1874	223.4		154.6		45.2	35.9	0.5
13935.2		-7.2	766.4	632.2	-68.8	7903.8		3540.2	-8.4	-37.2
2888.8		4029.7	20.8	1078.5	95	4488.7		-23.8	-23.7	-363.5
11991.5			1038.6	725.5	-100.3	3144.4		165.1	1	2693.8
10688.2		4720.7	895.7	690.3	142	2838.7		29	72.2	-12.8
-41.3		2933.9	1137.1	692.3	11.8	850.8		11.8	59.4	4294.2
3270.7		4907.3	850.7	-22.7	-2797.4			5.5	65.5	4267.5
-28.5		5032.5	794.6	646.2	-480.9	4052.8		6027.5	96.7	3866.5
5546.5		-503.7	17.6	20.5	-656.7	1228.5		24.8	4.2	-63.8
11411.8		4824.8	1250.2	4.2	2754.8	1061.5		20.5	-1.2	-36.5
17154.8		28378.8	-24.1	-4.6	-374.2	2243.9		181.1	-18.4	6555.8
21142.3		906.2	1016.6	863.4	-27.5	7118.9		-44.6	141.5	6179.9
11268.1		8823.8	2271.6	1424.9	606.6	13.6		2207.8	97.2	-28.1
13987.1		17043.9	2369.4	1205.2	99.2	204		1117.2	-22.1	1320.3
17605.8		4200.1	-345.7	-47.2	803.8	1023.6		413.2	-8.8	-18.5
-61.5		11648	62.9	869.5	770.5	3519.6		-22	-15.5	6903.3
13409		3267	1610.1	12.7	147.2	1796.7		-3.7	49.8	7093.2
10483		16380.6	1608.5	526.3	-5.9	5249		5468.9	144.2	4199.5
10055.8		-317.5	-34.1	-14.3	-278.8	3544.5		1341.6	-289.3	0
2294.5		-1328.3	-16.5	231.8	410.2	35.1		-20.8	171.2	6485.1
21945.1		5065.6	1998.8	2580.5	-392	3885.4		2214.6	514.1	-6.5
16310.5		16892.1	2857.5	972.2	124.5	1878.4		3718.5	7163.5	2490
15262.2		3346.7	53.8	948.3	1830.7	2151.1		-3.9	-105.4	146.1
6740.6		15824.7	1629.6	535.1	2287.5	4720.6		-42.7	3.8	3270.3
12158.8		3782.8	4266.2	574.2	3611.8	2891.3		1643.8	785.9	1187.2
14304.8		17633.1	753	1089.3	-253.5	-26.2		9958.5	-500.8	2514.2
17038.9		15092.4	1608.5	793	-276.2	6123.6		2319.6	-82.1	1862.2
17397.5		-300.6	2934.5	517.2	1377.6	37.2		3691.6	162.2	30.5
9154.8		21720.6	17.7	1820.9	27.9	118.8		-16.9	-3.7	35.1
6441.6		9801.8	303.5	848	-404.8	3404.8		-11.5	-584.4	1996.5
7013		919.7	1625.8		-156.7	1309.6		8008.5	136.5	28.7
99.4		8557.8	2292.6	-1103	-32.1	1930		5636.1	1495.2	1715.3
22210.9		4422.8	2549.1	42.8	46.3	5264.7		11279.8	-829.5	3503.6
-18.5		5323.9	-15.5	7835.5	175.5	2473.7		-55.5	-0.8	869.3
16549.5		16644.1	2351.8	1954.6	83.4	8023.8		6278.9	2	5620.5
-46.1		15127.2	3697.2	118.4	81.2	3279.7		43.3	-36.5	10.4
20607.5		46.8	2695.8	3937.4	760.2	1050.2		54.5	-87.7	2230
4348.3		-49.7	-6.2	55.3	-15.2	2433.8		-35.8	-1559.2	3875.5
1.3		4365.9	-510.1	-108.2	423.8	969.6		0.1	22	3339.6
8190.2		2971.8	2090.5	89.9	102.1	1583.9		-40.5	-26.4	11.2
11598.9		67.6	529.2	283.2	512.2	1447.5		-26.3	13.2	256.8
249.2		-18.5	1004.2	6014.5	2616.4	1761.7		39	-25.5	2624.6
6171.8		5582.2	2354.8	1450	-499.5	3441.5		43.4	-31.3	2047
5390.8		-74.5	9.5	420.7	9.8	4275.8		-4.8	-7.9	-14
31.3		41.7	1155.8	-741.5	84.8	15.7		3666	83.3	3005.7
4390		16551.4	4713.8	5969.2	12.1	3224.6		18.8	-28.2	3770.5
12918.5		13415.6	4224.3	9863.9	639.9	4090.4		5022.5	5.1	3311.5
2241.6		5333.3	3503.2	1164	57.6	1256.2		6466	141.2	2855.2
11322.7		11729.8	1391.5	8528.7	6.1	38.5		5042.2	-481.5	7.5
4478.8		11145	1616.5	2234.4	72.7	2332.8		9.7	1042.7	2500.6
-77.4		-82.8	11.4	-3247.8	-309.2	2057.3		4116.5	262.1	3254.2
-19.3		16142.9	644	750.8	9.5	379.8		-51.1	-28.5	4838.7
3905		15684.1	6.3	9492.9	-44.5	2852.8		-24.7	15.9	2351.3
		9332.6	3210.8	52.6	147.4	555.9		2464.2	4.6	2273.5
5968		9036.5	-7.8	-2985.8	230.2	2831.4		50.1	74.1	2211.6
3667.9		26.3	10.9	2110.8	179.1	3525.9		2502.1	70.4	-30.6
3352.9		12569.2	7.4	1536.6	25.5	8013.6		3184.5	9.8	27
3093.2		-1850.2	1204.8	5392.4	120	3877.1		6690.2	-5.2	3777.7
31.2		7434.2	-22	-15.2	17.5	1674		4065.9	-11.2	4355.5
3247.1		49.5	1674.4	8334.4	-56.2	813		4354.8	-140	26.1
348.2		9552.3	1963.8	1682.9	-29.2	-54.7		1594.8	-742.8	2042.9
878.2		19885.8	4243.8	-709.9	80.5	3187.8		52.2	456.3	6187.9
3894		156.7	15.5	157.5	48.8	-207.2		-24.2	23.2	41.3
1404.8		7241.9		1051.1	90.1	7.5		6734.3	-98.3	49.6
3314.5			-24.2	5630	31.3	38.3		4014.6	424.8	13.4
3389.1		8248.5	895	9128.3	116.2	3147.6		-44.8	-4.8	1937.2
3832.9		-84.7	-2.6	1468.5	-46.7	1641		3.2	259.4	2497.2
3464.2		4582.3	1943.8	7470.5	-3.5	4261.5		3515.4	10.6	5588.3
5261.4		8268.7	1265.9	13577.1	5	10813.2		-1.4	2006.5	-0.5
4308.6		3699.3	16615.9	7418.4	-34.5	-129.5		-42.9	187.8	3081
2496.1		2234.5	2372	7262.6	-69.8	1965.8		-10.7	1099.2	-36.6
-47.6		9764.8	4392.6	-3686.7	-14.8	25		3748.8	162.5	1705.6
2820.8		19781.4	10063.2	9842	-1.2	1601.8		10.8	-9.6	259
3240.9		13504	8935.9	5216.1	-16.1	1130.6		3348.5	-136.7	3623.9
2067.5		5206.2	-283.8	5895.6	14	1692.3		-16	170	19.3
2746.3		127.2	2097.8	675.8	-48.1	377.5		2633	373.8	34.6
2834.9		6885	176.9	9056.1	580.6	622.6		4604	2127.7	3294.4
2649.9		7662.8	846.9	-56.2	3.2	1275.6		10.1	289	2384.5
81.6		5575.8	18583.9	3995.9	-17.9	65.5		27.3	0.4	-8.9
688.8		17637.7	3417.9	16.2		35.3		3530.8	-486.7	2020
2902.7		2525	896.8		121.1	7761.8		4003.3	-15.2	1481.2
9		15670.9	3095.8	9670.5	482.8	1724.5		4576	24.3	1020.1
1434.9		2427.8	-4575.7	1192.6	272.7	2484.1		4362.5	1301.1	-5.2
3360.2		4023.6	36.2	289.8	-11.5	67.4		29.5	198.8	1667.3
504.3		472.9	10064.7	-22	696.7	2214.8		-66	173.8	-1.4
2572.1		9042.6	1761.5	-192.5	-55.1	2373.3		-0.5	-557.4	2948.1
-41.4		7355.7	-51.2	-396.6	74.5	3098.8		17.5	127.7	1419.1
20.8		2027.6	4171.2	5641.8	-315.1	1292		0.2	-9.1	-28.7
4080.5		-379.8	1768.7	124.7	319.4	1619.2		-15.5	1146.9	4.2
3215.1			66.8	7286.2	-18.3	1726.1		2805.4	1111.5	706.8
4958.8		9337.8	5654	5374.8	125.8	7426.5		-29.8	914.4	1304.5
1973.4		5827.8	11.7	3842.7	783.9	5220.8		-5.2	-62.9	3014.2
3585.8		5.5	2.2	93.2	234.5	2811.1		-12.4	-29.8	1740.8
7316.6		2800.2	-148	39.3	-139.5	389		36.5	-5.9	2017
3590.9		4182.9	8782.5	282.8	-869.8	3205.1		38.2	43	1745.8
6200.5		3224.2	1146.3	949.9	1952.9	2908.6		-1	4.4	3546
4211.4		1984.7	19654.4	454.5	211.7	1107.1		2930.5	-9.2	1854
4881.5		61.8	4.5	1232.8	865.8	1768.8		27.2	4.7	-37.5
2994.2		101.8	11707.1	400.3	277	1981.5			-50.2	2093.9
5392.9		5182.3	-76.5	2008.8	169.2	1085.8		1.5	-102.8	-38.3
130.1		7234.6	427	2062.5	-54.6	59.3		155.4	-23.2	-26.4
4189.4		4317	12007.3	1228.8	1511.3	1093.4		12020.5	-10.2	82.4
4511.5		7350.9	-137.6	46.3	1267.1	1535.1		-15.7	-15.2	1293.4
2536.8		-40.2	8508.3	361	-195.3	55.9		-0.5	-830.1	6269.2
2044.9		1710.5	12666.8	849.8	5431.6	3761.5		8665.4	-26.6	2936.1
3924.5		12129.2	35.3	653	-30	2010.5		-56.3	2851.7	1759.5
-32.4		5866.5	10162.2	817.6	202.2	-20.3		9487.5	12.7	-449.4
3048.3		2763	-249	233.9	417.7	1000.6		13.3	-1730.7	1270.9
3719.7		139.8	15.5	621.7	1039.6	641.5		405.6	455.5	1612.8
-102.8		6587.4	-75.2		-28.3	1324.1		-17.3	58.9	1887
2267.1		7614.2	-77.5	30.8	83.8	-31.1		-1.2	-405.8	2610.3
-6.5		-2472.3	64.6	21	-1599.7	263.3		8418.8	-22.8	2125.2
3274.8		1602.4	108.4	1364.6	2174	4231.6		64	1521.1	145.1
3818.2		-399		2420.5	43.4	4275.6		934.8	218.7	3406.9
2170.5		-252.4	5866.6	1809.5	1829.3	11.2		9365.4	-7.3	1119.8
3049.2		-153.9	3247.7	1665.3	14.1	95.2		2500.3	5.6	2793.8
13.2		-163.8	22.9	18.5	195.2	3047.3		3394.8	27.7	2616.4
9970.4		201.3	11682.8	3341.2	-282.1	-405.1		6786.9	80.9	2567.4
-65.8		4181.8	-841.6	9.7	28.5	3072.5		4629.5	27.5	1671.2
112.2		364.4	4025.3	-38.2	-22.9	19.4		7836.5	-7.8	-264.6
8434.9			451.4	1563.3	-347.2	593.5		-26.5	40.5	15.1
3168.7		934.2	18680.8	1622.8	927.7	23		30.5	-7.2	23.4
-11.2		9.8	6361.3	2121.9		4570.2		7959.6	-22.7	326.9
14.5		1445.3	77.6	1478.9	-38.9	50.5		369.5	-36.3	1950.7
2567.5		843.2	1406.2	3081.5	118.5	0.5		5918.5	-10.8	7472.2
-263.9		339.2	2946.6	4797.9	19.3	2940.1		-134.5	15.8	2552.2
8088.3		3.2	308.2	2368.3	-11.1	11.8		1920.5	25.1	693.8
9975.4		36.3	-1066.8	-11.2	-15.7	-4		11320.8	-39.5	914.4
4.5		1247.5	5526.9	-12.9	-6.9	1948.1		8599.6	15.1	825.5
6805.8		112	3498.9	1851.1	-16.4	-24		46.8	-24.8	2527.3
-9		86.2	2049.9	2903.6	-13	1717.9		15.6	8.1	5081.8
-20.8		1074.2	-785.2	17.7	0			4586.7	-7.6	1527
623.1		2166.3	9435.6	3990.8	-14.6	7533.2		-14.3	5576.5	3248.4
9574.6		1274.2	2732.3	-19.9	-13.3	30.2		5284.4	6.2	2019.8
5167.2		251	1435.6	10.3	-21.5	-13.5		9634.7	-707.2	649
6883.2		-0.9	5167.2	1920.8	37.2	6569		14187.8	132	2279
8531.5		849.7	3108.8	1572.1	-25	7632.2		71.4	141.8	-40.2
-14.8		75.6	6593.2	-12.2	-11.8	6517		1025.1	657.2	693
12185.7		120.2		2544.2	60.7	7314.8		-11.5	-0.2	-12.6
9418.2		275.8	94.2	1872	11.8	6957.2		8105.2	19.4	2175.4
4195.4		-276.2	2361.5	84.6	14.4	17.1		7882.6	1.2	-11.1
4584.6		400.2	2478.5	1223.4	-2.3	9117.5		9596.8	-34	-4.6
31.5		1301	588.8	1343.9	643.5	8150.8		7310.8	-0.2	2499.7
		517.6	1560.5	1376.7	25.5	208.8		5234.8	17.5	2556.4
-16.3		286.1	885.7	1345.1	-18.2	8280.2		5875.3	-30.5	-13.1
14.8		1030.4	-517.8	-2.5	11	9896.6		4651.8	-8.5	2625.8
3492.2		769.7	5888.3	2.5	-1.2	-145.3		9661.8	13.8	2056.7
31.5		-402.2	13207.2	5.6	538	162.5		927	1.2	-108.5
3582.5		440.2	3605.8	839.6	1036.4	818.8		2	79.8	4628.8
-2.4		267.3	11532.4	35.5	351.5	8182		7266.8	15.8	12.7
8261		121.8	144.6	-0.8	7.3	15952.5		7999.3	-14.2	54.7
6553.5		839.9	72.4	369.9	6.8	1415.4		12273.3	33.1	-32.2
25.7		570.6	3920.6	1350.6	21.8	-42.6		7554.1	27.2	-40
3186		-12.5	6151.6	2188.8	582.2	-73.9		5815.8	726.4	4035.5
3678.4		499.7	-16.4	-0.6	30.2	12.7		168.5	13.2	3100.6
7374.6		754.7	276	1851.4	-5.8	8162.1		7387.8	-25.6	2118.1
-35		775.2	2641	883.5	948	8184.3		14544.5	-265.8	2981.8
1576.6		685.4	3671.8	-30	342.1	-6.1		3263.8	31.5	3550.5
5642.2		130.6	2833.7	1121.9	1231.3	7766		3603.6	46.8	10.8
14761.5		25.5	1486.4	1925.8	-10.3	26570.6		6441	25.8	4520.2
7838.8		363.9	-1194.6	-27.4	1085.2	14184.6		9355.5	-13.7	3873.8
4.2		-359.4	-358.7	1100.5	61.8	0		7110.5	135.1	11.3
17.5		1209.9	4490.1	479.2	25.2	0		2.8	-71.8	878.7
4836.2		-30.8		1373.8	-4.3	0		-76.5	22.7	1946.7
7387.8		-964	4.8	-7.7	8.3	12863.9		-58.1	145.5	2115.2
7113.8		2086.7	26.5	20.9	2142.5	0		6914.5	-24.8	1883.9
3878.2		941.6	274.1	3141.5	1461.6	0		6.5	63.3	-801.5
4483.8		-50.2	1287.5	1145.5	26.2	0		3658.2	47.1	132.7
5810.1		2.5	-134.1	-5.3	-3.6	20248.7		4975.5	9.4	3999.6
2440.8		216.8	418.2	1761.9	34	0		1248.7	12.6	-8.8
6825.8		283.8	-208.6	1345.5	-21.6	6868.8		2918.6	429.8	2689.3
2691.2		328.1	-84.3	1168.4	46.6	-3017.5		5636.5	-54.2	-17.7
3377.5		920.2	333.2	1623.8	-113.7	0		14354.2	357.3	1097.3
2763.8		823.6	66.5	1640.4	-100.7	16161.2		5733.2	0.2	14.8
6138.1		115.5	903.5	21.8	78.3	0		-117.9	198.9	2740.7
5779.6		762.5	1183.3	-6.9		0		4007.5	11.5	757.3
2824.5		406.6	68.8	3.4	17.8	12099		7713.8	-12.7	1064.2
3828.5		328.1	26.2	1760.8	-12.4	0		9686.5	-0.2	2063.5
7597.2		92.8	-467.5	12.8	81.7	0		-7.4	-3.8	2932.9
1674.6		482.5	67.6	-24.6	2467.2	-9.7		424.6	4.5	3504.7
9963.2		588.8	877.8	0.2	-70	11886.2		8921.4	-573.5	1881.6
-9.4		935	377.5	1639	2539.5	0		11840.8	-6.4	-9.8
-6.5		-91.4	-194.8	1059.6	4687.4	0		3448.7	69.9	1421.6
4147		-244.5	-49.3	1857	-119.3	17005.5		11363.5	15.6	2719.6
6587.6		4646.5	1342.5	2596.8	1183.6	0		-10.3	78.1	2091.1
5690.8		1605.1	-303.5	1741.2	-209.7	16.1		12488.9	934.7	1569.7
-0.9		-11.3	-65.6	2126.6	2619.8	0		10182.8	4.4	3097.4
3390.6		-135.2	-78.2	454.9	-190.7	7.4		4458.8	-12.2	4671.5
106.5		433.2	-383.3	868.5	-3995.5	0		13807	-7.8	-0.1
5371.5		-8	50.4	19.3	-90.6	5073.9		114.8	0.5	116.8
8204.9		1152.9	397.9	49.8	2278.5	4140.1		5343.8	-1.3	16.5
6490.8		410.8	1167.9	24.3	-0.1	0		4345	38.9	265.3
12928.6		1510.8	-16.5	702.2	-3181.7	0		-34.3	-17.3	60.8
3302.3		285.7	384.5	555.2	5.6	0		-29.3	-25.8	1681.4
4982.8		-77.3	-15.6	1737.7	88.6	0		10.8	746	1989
7414.5		2650.3	-91.3	1967.2	-4002.5	0		6805.1	-97.2	13.1
-11.5		2.8	-139.8	2729.5	1229.5	4390.6		7241.2	-26.8	1181.5
3679.6		-157.4	751.8	3952.5	3273.9	2830.5		5877.4	-6.2	-0.5
1895.3		2720.4	1051.2	3.9	547.7	16939.1		-23.7	-10.8	4.7
6783.8		2356.6	-9.9	12.8	835.3	0		-54.5	348.2	535.1
7273.5		518.5	-150.3	1107	2297.2	0		3152.6	-14.1	2735.8
8991.6		962.5	-113.7	17.2	393.1	0		14426.3	-0.5	-8.5
6602.4		1705.7	5.6	1440.2	689.9	21396.5		11424.8	0	2297
-5.8		1912.1	-124.1	-8.8	459	12979.2		7272.8	165.8	37.5
4947.6		2079.3	-128.4	864.6	1460.5	3314.6		8103.2	-6.2	1932.2
3668.4		-28.7	-20.3	1143.4	-496.3	3962.5		-5.1	46.8	986
2475.7		2439.5	-190.3	2325.9	421.1	5116.5		3643	120.7	2421.2
-8.2		-4.5	656.8	888.5	1357	5699.2			18	4375.2
3436.8		81.6	24.4	807.7	1891.6	-8701.7		2.3	-3.7	982.8
7768.5		2493	-119.9	835.9	2859.6	6125.4		1143.9	8.2	2836.1
3741.2		13.8	-235.9	2306.4	-2117.1	8228.8		-18.3	5520.4	2599.8
3018.5		5.4	10.5	973.4	1492.2	13076.5		-10.4	21.3	-9.2
3369.4		2910	716.8	2619.5	2061.3	10706.5		2023.5	72.3	623.3
3357.8		1089.8	-31.8	-6.9	2393.2	8071.7		145.2	32.8	1914.6
-37.9		2251.7	-865.7	525	-459.3	3640.2		2259.5	-51.8	2757.4
3351.4		-29.7	-15.4	868.2	2056.2			2925.3	-8.9	3.8
-4.2		103.2	142.3	14.7	1036.8	0.6		525.8	1876.8	1585.1
3444.3			-242	1340.3	2458.3	443.8		239.4	-42.8	5.2
6267.9		854	743.8	1151.9	393.5	-23.6		149.2	-76.4	5761.6
40.9		-11.5	319.5	4846.5	-0.8	2934.5		2050.4	-46.9	93.7
-1.7		585.3	-287.6	638.3	-1806.2	6500.8		224.6	180.5	-0.6
3813.2		328	72.2	1748.8	-656.2	2699.2		2241.4	10.4	17.7
6.5		482.1	-602.7	907.3	-147.3	6945.2		1985.1	1555.8	11.8
		-27.6	-1403.5	15.5	2532.3	5411.9		4.9	-25.1	-229
		514.9	2687.2	896.9	3251	5057.5		-2	-136.8	1439.8
		-17.8	601.7	1414.8	2127	6047.2		12.2	-102.7	54.6
		427.5	474.5	1221.2	109.9	4697.8		-5.8	-38.2	171.2
		709.5	59.5	751	2693	5259.4		-17	51.8	3008
		350.9	-75.7	268.6		1494.3		3009.4	3.5	67.6
		1862	5.4	512.2	74	2728.4		2492.8	-240.8	2780.4
		9817.2	586.5	1209.7	3159.6	2150.2		2669.3	252.1	979.8
		1791.5	-9.6	3380.5	-15.8			79.8	7271.6	3202.5
		221.1	-107.1	2708.8	-183.1	1644.3		8.9	-69.8	3804.8
		9242.2	-107.3	-31.8	-26	4704.4		-24.1	125.4	7133.8
		272.5	1155.6	1188.8	30.8	4323.5		-1.2	-502.4	191.2
		10.7	549.2	1059.2	-516.2	1771.7		8.1	18.9	12.2
		6384.5	-166.7	4033.5	1840.6	326.2		1262.5	-1284.6	-18.2
		2981.7	5	855.8	64.3	6673.5		2669.4	3253.9	3138.2
		116.2	1085.3	-12.7	700.8	2879.1		3246.9	3584.9	1377.6
		-102.5	58.6	2287.5	143.8	2204.6		4158.5	94	51.8
		633.6	-12.5	1920.2	-47	9.4		2156.7	12.8	1449.8
		2162.5	165	460.2	1795.9	1555.8		576.3	-4.9	17.3
		7766.1	15.8	2421.2	-24.7	2161.3		2693.5	181.8	0
		1144.2	-101.5	1337.6	-38.2	3058.6		14.8	9869.2	885
		-32.2	-49.5	-19.5	-39.6	2328.9		1540.2	-815.1	26
		261.6	-3.2	1712.1	-24.8	1284.8		-74.4	49.1	16.5
		2950.7	2.3	451.5	159.2	2356.7		4240.1	-26.2	132.2
		80.8	41.2	1928.4	74.2	3643.4		2432.5	-44.7	-19.9
		323.5	143.5	1565	-11	1831.1		475.2	11.7	-8.6
		7116.9	22.8	1338.8	-46.9	1958.8		16.5	-59.6	3879.5
		105.4	9.6	1799.8	-127.6	3691.8		1490.5	415.5	2881
		564.6	533.5	2395.3	888.3	2668.5		2728.9	27.1	2822.9
		185.6	1601.9	1.3	43.8	4.8		742.8	-10	55.8
		1974.4	27.8	1173.2	728.4	1927.9		1766.7	-1199.2	2214
		3694.9	650.2	1077.5	1344.8	-8.5		1655.8	70.5	909.2
		4667.8	21.7	663.9	125.8	1404.7		3016.5	-13	-103.2
		440.4	-2.8	1223.9	-3.5			1838	3996.8	1276.5
		6099.4	-4.7	-16.8	395.5	2345.2		-3	5953.8	689.6
		22.7	2644.5	1811	340.5	998.4		2375.8	-33.7	-0.7
		284.3	-45.7	807.5	11.2	1038.4		-1.5	3.7	-20.3
		397.1	-27.4	1325.2	15.6	-542.1		55.8	-55.5	2910.5
		-64.6	1741.4	1872.9	420.5	1341.9		37.1	-1770.5	195.2
		-11.3	708.8	-4.1	271.5	1259.4		37.8	-5.7	253.2
		379.7	12	10.7	470.5	1281.5		3153.7	19.2	-22.2
		275	197.8	-10.9	44.7	1256.5		2903.7	-1254.6	86.3
		695	-18.9	621.8	528.8	421.1		3293.8	132.4	322.7
		5120.1	-1.5	187.8	-57.5	45.3		44.2	-67.2	30.2
		1393.6	585.2	1101.5	-460.3	1347.5		-18.7	-154.1	71.9
		1832.2	-8.8	18	-132.1	1993.5		4681.8	1881.5	-15.7
		682.6	-678.8	1924.4	594.1	1153.5		2706.3	76.2	693.6
		-27.2	2366.2	4.6	64.3	1937.7		3404	8831.5	1193.5
		2702.5	77.3	957.8	416.6	2160.8		4601.1	52.2	4.2
		3605.5	1543.9	778.3	1089.2	1675.8		945.4	-384.5	-35.6
		865.8	10	1333.8	-49.4	1455.4		1261.1	51.5	-50.5
		327.8	-276.7	1.3		2077.2		4770.8	5870.5	1813.6
		-7.3	162.1	1797.2	207	2568.6		0.6	-7385.9	-20.7
		466.1	25.8	1109.6	-4.8	674.4		-3.4	814.3	-27.1
		10.5	2563.5	690.2	-15.8	-116.5		2696.5	-941.5	-18.2
		1392.2	1878.5	1306.9	10.5	1512.8		-0.8	7296.1	6911.8
		45.8	3040.4	-15.8	-24.2	375.7		4444.6	8457.2	-268.5
		2211.7	-13.2	-8.5	-6.3	755.8		-5.8	-55.7	-2.9
		962.7	111.8	60.2	-10.9	491.9		2699	499.9	-10.2
		7.5	8.9	1391.5	2239.9	1393.8		1.7	-4.6	-40.2
		1.8	165.4	1378.8	-0.4	1441.7		6.5	302.8	6.5
		299.5		1171.2	-3.4	468.2		5679.8	-6.2	1794.5
		7.5	156.2	1809.8	11.8	2082		4760.2	8108.5	87.1
		643.8	0.9	1691.6	18.4	539.5		2862.7	744.5	1564.4
		19	211.5	1344.3	31.5	-78.5		143.4	36.6	1517
		43.1	-52.4	-3.5	26.6	2205.5		3962	-1047.5	-14.1
		128.2	21.8	879.2	-9.6	1893.6		2906.3	-955.6	-6.8
		302.6	78.8	1595.4	17.1	1748.4		52.9	-2925.7	80.6
		77.1	224.8	1406.6	-25.8	899.5		2887.2	-2870.1	4367.9
		9.5	55.2	1830.6	4.6	1899		-37.8	42.4	0.4
		37.3	-12.3	1.6	-50.3	725.6		4556.4	-299.1	1270
		615.4	7.6	755.8	19.8	2390.1		2803.3	0	-12.3
		478.7	262.1	10.2	42.9	3475.7		-15.1	-1112.6	1587.4
		1922.8	-8.2	609.2	-11			3094.8	8167.4	-18
		-32.7	112	597.5	-1.7	-39.4		4952.2	24.6	-31
		284.7	-161.1	2271.7	-17.8	4672.3		2913.1	954.2	6.6
		642.9	222.3	1655.8	229.2	-17.5		2.5	-4546.9	1598.3
		59.5	6291.5	763.2	3.4	3100.5		3132.7	-2756.4	1448.7
		722.8	118.6	990.8	19.6	-24.5		-30.4	3802.2	39.6
		707.2	119	2802.9	10.6	7033.9		1449.2	-10.4	52
		529	1805.4	-13.5	-13.8	35.8		2566.8	-72.3	6.4
		105	71.6	-3.2	-11.1	3034.8		3676.6	4885.5	1.7
		5696.9	98.6	-8.4	9.8	-7.5		3124.2	-716.7	6.2
		851.7	17.8	1597.1	-10.1	6195.7		-4.2	-1138.2	3319.7
		-20.8	1672.2	1378.3	-18.3	3966.1		3889.7	-18.3	-1.9
		18.8	1233.8	16.5	8.4	5809.9		3609.8	3273.2	1218.3
		285.9	-96.9	964.6	-8.4	2374.6		4870.5	2890	11.3
		5650.4	-307.9	395.6	91.2	7149.8		55.5	-8.2	1797.3
		21.2	59.1	1146.5	33	3632.5		3951.3	-84.8	986.4
		17.5	-37.2	1.2	-5.4	5834.4		13.2	-10.2	-0.4
		2682.7	1116.4	-0.9	-24	2369.1		67.3	14421.5	-26.8
		-36.2	1872.4	1268.5	36.8	2511.5		5646.2	21	-11.1
		3.5	-76.2	-13.7	4	3757.1		5787.9	-65.4	6.2
		-41.7	151.4	1749.7	-45.5	4552.8		25.8	341.5	32.5
		2670.5	112.8	20	-2.3	4382.5		-6.6	42	895.1
		6.6	61.5	1.3	-17.4	6427.2		14.2	2176.7	1317.4
		2910.9	541.6	841.1	-20.1	708.4		-388.2	25.1	-25.4
		32.2	2845.8	35.1	1622.1	2962		8.5	13308.1	-7.4
		17.1	5334.2	2608.5	104.2	5251.6		275.5	90.5	-24.7
		-2.1	-17.1	644.2	-33.5	5873.2		4.9	-17.2	-18.4
		4119.9	7461.7	1562.2	1880.5	2505.7		4523	-35.1	18.4
		48.4	49.6	360.3	-1.7	3110.5		-5.5	52.5	1978.9
		-5.8	25	3.5	-19.7	4077.7		4442.1	116.2	-8.8
		2034.9	27.5	1694.2	10.8	6183.2		5430.2	6059.8	2193.4
		41.4	50	2307.9	10.7	5889.7		-17	-68.5	4.2
		-2.3	16.8	-3.8	-11.7	9568.8		8.9	485.5	-12.3
			163.2	613.4	-25.4	4266.8		3456.5	-28.4	-22.2
			159.9	-6.8	-2.3	5341.5		4073.6	4653.9	872.1
			-45.2	1725.6	21.2	1305.2		2497.4	-30.6	-3.5
			62.4	2.1	-10.9	3851		-32.5	-100.8	1947.2
			175.6	1691.3	1.1	8631.2		5289.9	-3143.5	1962.4
			3746.8	502.7	-2.6	10342.2		3800.5	-53.5	1599.2
			20.9	1657.4	482.6	2609.2		3996.5	98.5	13.6
			202.1	1508.3	-19.9	10384.4		-24.3	-35.9	1618.8
			129.4	982.2	2.9	3028.5		3387.8	-14.4	2365.5
			43.6	767.2	-10.6	133.5		11.3	24.6	41.8
			10.7	2.1	-4.5	7811.4		4349.4	-1187.9	-11
			-43.2	4.8	1.6	3583.5		-63.3	2920.9	106.5
			5258.7	555.2	189.1	7709.5		2065.1	4.6	2476.5
			101.7	0.9	-40.6	10103		1953.5	5.3	-11.9
			178.6	-38.1	426.2	7965.2		91.5	44.5	1302.2
			7365.7	255.1	34.7	3368.2		4640.9	-5419.1	11.1
			2255.8	2711.5	4.8	6164.5		3977.4	-32.2	1642.2
			82.7	1402.4	37.6	2986.8		5598.5	-79.8	88
			48.8	-8.1	-6.4	7492.1		4062.2	602.6	-8.7
			65.8	2.5	-22.5	2497.3		4310.6	3929.3	1775.5
			2171.8	3.4	-35.5	8544.5		3773.7	-19.4	-21.5
			-9.8	1721.7	21.7	5557.2		3966.7	0.7	1854.4
			3215.8	621	795.7	3026.7		65.8	-34.2	944.8
			37.2	1374.4	128	4999.7		4.8	1074.7	1231.5
			198.5	1936.2	-14.3			5574.2	-1002.7	7.7
			6232.8	19.2	219.9	1791.4		44.1	-15.1	683.2
			21.8	593.2	1425.1	1606.2		1.5	-0.7	1970.5
			-86.4	15.5	4.4	1824.3		3939.2	3089.7	1671.9
			1752.8	1028.5	-19.1	2454.7		-24.6	4.2	11.2
			198.1	2	-9.1	-5.2		2884.5	-6.8	597.7
			61.1	-12.2	-26.5	1439.3		20.8	213.2	2206.5
			226.9	1.1	21.2	957.2		-28.2	-7.2	13.1
			531.2	887.8	-20.7	8.1		3594.8	4862.5	2037.8
			-28.5	11.5	24.6	1691.3		3950.3	-12.5	1799.1
			-23.5	-6.8	2.3	1482.7		3250.2	-51.5	0.3
			517.2	1904.5	-194.2	1186.1		4770.2	-12.7	1675
			9.7	-4.8	-15.4	1182.7		164.8	-259.9	19.7
			-17.3	770.2	10	0.7		-43.5	8.5	2155
			202.8	3366.3	2.8	-25.2		-3.5	286.5	-15.3
			135.5	1180.3	-5.5	271.2		52.5	38.6	-34.5
			187.5	11.9	-7.8	2762.1		4311.6	-750.2	39
			2579.2	1361.8	-1.5	1778		-45.7	-134.6	1369.8
			-8.7	1420	20.9	17.1		1507.6	143.5	12.5
			-98.5	1066.9	-0.4	1805.4		2511.5	2854.8	-14.3
			1117.2	642.5	4.2	3621.8		3780.6	474	156.2
			16.5	1172.4	-36.7	4046		4184.4	0	1246.4
			14.9	3758.3	0.4	4382.2		-30.6	122.8	-22.3
			104.2	0.2	2	2420.7		3242.2	-7.3	-8.3
			-22.1	-6.1	727.2	2365.8		-21.8	-16.7	1560.8
			316.5	1026.2	-6	787.1		3121.9	2550.4	1895.6
			-22.5	1468.5	6.3	931		8027.9	-20.2	501.1
			16	226.3	15.9	-20.7		-35.2	5509.7	2203.6
			84.2	1353.8	-16.8	545.8		52.2	133.9	-4.6
			494.5	615.8	1.6	1318.3		4304.9	254	1818.1
			-82.5	9.8	-16.1	-44.5		4658.7	-39.2	1775.2
			-85.6		-4.5	1314.3		5302.2	-494.2	1516.8
			4355.4		0.2	-17.9		537	-92.5	1740.8
			1876.4		5.3	252.8		4577.2	2191.1	1282.2
			1404.6		8.2	4384.7		4039.3	-53.1	764.9
			387.9		6.7	2348.7		79.4	-67.4	0.8
			-31.9		28.8	3672.5		10830.6	-74.5	1597.7
			-97.8		38.5	39		9332.2	-229.2	1364.3
			508.8		19.6	3275.5		27.1	1174	46.5
			-574.6		-12.5	3648.1		3811.9	6319.1	-41
			-9.3		2.7	1688.8		1936.1	8810.6	321.2
			15		1.4	1120.6		1675.2	29.3	1369.2
			-44.4		-3.8	3327.8		15372.7	440.2	1320
			1521		3.5	3681.9		-5.2	3216.3	21.5
			1121.9		6.8	1927.5		-184.4	57.4	13.1
			1758		599.1	46.4		-4.3	12724.2	4749.2
			2698.8		48.2	-4.5		-408.2	184.8	1481.5
			32.4		-15.9	8240.1		-1815.6	134.4	596.4
			248.5		43.8	414.6		-817.1	-284.2	1480.2
			-71.8		7.8	61.5		57.4	-60.2	1705.5
			1164.6		13.7	1376.2		-74.3	259.3	14.8
			-3.3		92.8	582		4423.1	-62.2	2153.5
			-10.8		-110.4	17		88.3		2076.7
			1.8		417.5	1609.8		13710.9		-24.8
			-31.4		87.2	58.9		-14.5		2759.4
			12.8		1	1749		2850.2		2119.8
			10.7		-15.2	21.5		-102.3		2050.2
			47.7		-37.8	-9.8		3790.8		1383.3
			1.8		18.2	1002.8		-19.9		567.1
					2.5	-2.6		-31.7		1181.4
					906.7	6074.4		-1313.8		2166.2
					-16.6	3169.5		6393.4		2091.4
					649.6	3457		1066.9		2473.9
					9.9	-20.2		4046		-195.2
					11.2	2000.2		5		48.5
					-266.8	2540.6		-1400.9		81.4
					-21.2	2035.2		-288.7		14.8
					17.5	2603.8		2909.8		15.1
					-10.5	-811.9		4186.9		1376.2
					26.6	970.2		140.8		-5.5
					-66.4	371.8		1.5		-14.2
					-136.2	1388.3		-539.7		12.3
					11.3	990.3		-53.9		1.6
					11.8	25.2		6074		27
					2.4	2107.8		-1506.5		-78.9
					8	691.8		2370.3		2425.3
					-35.9	19.2		-18.6		11.6
					-169	584.3		2849.5		-25.4
					805.5	-38.1		-870.2		986.5
					41.9	2595.9		2114.4		46.1
					-7.2	2558.2		-624.6		-21
					20.3	24		4856.8		677.5
					40.4	3640.5		-127.3		1432.4
					340.6	-9.5		135.3		329.8
					26	1001.6		2452.9		1293.8
					68.8	1436.1		-465.8		-7.9
					2780.1	2197.2		1626.1		59.3
					-20.5	1726.6		3405.5		-24.6
					-8.4	3279.2		4515.5		1389.2
					-146.6	1248.4		-46.4		18.5
					-190.2	2043.5		1385.4		1303.4
					8.4	3144.2		1732.2		2375.5
					40.7	-14.5		4591.9		613.2
					-35.2	649.6		-11.8		-13.2
					-7.2	2672.8		3957.5		-1.5
					-31.4	-22.9		4114.4		2869.4
					1456.9	-2.2		148.5		2472.4
					133.8	2179.7		-43.2		2806.2
					-60.8	5.1		8173.3		1839.1
					-5.6	1934.5		2187.7		36.8
					113.8	3282.2		-6.8		531.9
					-2.2	4660.9		6442.2		938
					-6	-21.2		3037.9		244.1
					-2.5	1678.6		1648.5		896.5
					470.4	1644.2		5320		113
					67	2415.9		3313.8		1915.8
					7	2340.7		114.8		1597.5
					-27.2	4558.2		44.3		1144.3
					-27.5	3605.2		662.5		1313.2
					116.5	-30		3334.8		-135.4
					-24.9	-11.4		-609.3		1939
					-197.7	-11.4		-71.6		1249.3
					-21.2	2671		2090.4		-24.3
					60.9	2735.3		5819.7		1208.5
					23.3	2096.7		-20.8		19.5
					131.8	6839.2		-6.5		1970
					1.8	30.2		5954.9		1627.7
					-2.1	1292.1		39.5		197.1
					18.4	19.9		46.9		1720.9
					-7.5	3671.1		57.8		1894.5
					1.7	1598.6		-14.6		1092.5
					-23.5	2065.3		10.2		-24
					22.3	735		16.2		2643.8
					-24.8	-8.2		3374.9		1396.6
					-20.8	2443.8		3520.3		1191.7
					104.5	-22		10254.9		-5.5
					6.6	3734.2		-42.6		15.8
					9.6	3050.8		22.8		2028.1
					225.3	1352.8		14.5		-59.3
					5.6	3871.3		2.4		2012.4
					14.2	4022.2		-6.3		-44.5
					9.8	-2		-34.2		1677.9
					0.9	1351.7		6.5		896.7
					31.3	1929.2		4137.2		-4.4
					25.1	2622.8		51.2		655.5
					-29.3	3579.3		-3.6		2635.1
					11.4	3079.8		1416.4		767.6
					-9.6	-4.5		-24.5		-8.5
					-29.7	3453.5		-55.8		1418.5
					-15.1	2113.7		3166.5		-51.6
					4.5	17.7		9.1		637.1
					27.5	558.5		4179.5		84.6
					10.1	947.8		2573.5		1041.5
					-4.8	16.3		-19.5		271.5
					-22.7	2801.1		3049.9		1788.1
					-54.6	1374.9		-10.3		1298.1
					-148.2	1926.4		-31.8		-135.2
					7.4	918.7		605.8		1642.8
					-9.7	14.8		2322		-6.8
					-17	-18.5		3644.7		1306.5
					-9.3	623.1		4762.8		873.2
					47.4	1839.5		4.8		-2.9
					6.8	7402.1		-14.1		-32.8
					5.5	1326.4		-109.9		1844.2
					-37.4	2772.4		2820.6		-26.8
					-4.8	2780.1		2316.1		2485
					-12.5	36.3		2518.9		1115.1
					14	-12.6		2716.3		1690.4
					78.6	1358.7		7658.2		8.5
					2.3	611.5		-15.7		-4.5
					-19.2	19		4166.3		1723.6
					8.3	-3.9		2994.1		1573.5
					-22.7	-32.2		6382.8		1674.3
					-26.8	1232.3		15415.5		1470.2
					-7.6	1425.3		-24.8		894.5
					-18.1	-22.5		4822.9		1983.2
					22.8	34.2		3902.8		69.1
					-5.4	70.4		2277.3		3711.5
					-2.3	1967.8		3831.5		-9.2
					0.5	2213.6		5613.4		1360.4
					-8.3	3.9		3522.2		643.8
					25.5	666.9		-4.9		1865.4
					-8	29.3		10156.1		2023.7
					-9.2	18.2		1241.2		22
					8.8	-12.3		1990.2		2576.7
					487.9	1255.8		134.1		27.3
					-13.9	8049.5		1549.9		-2.7
					-6.6	845.8		5785		-10.4
					34.1	-13.6		2452.9		1697
					-24.9	27.5		-7.9		2033
					-149.2	-9.4		-7.2		43
					-7.3	857.2		-5.9		-5.2
					-53	7.2		22.4		1863.2
					-14.2	5.8		4026.9		63.8
					27.2	25.6		2182.1		-51.6
					187.8	-13.9		2774.3		-11.7
					-13.8	-19.1		3533.4		10.1
					-7.8	19.5		3254.8		245.5
					-3.6	268.5		3935		1758.6
					557.4	1567.9		-44.1		1823.6
					622.2	17.8		2060.3		1710.3
					-25.3	1828.7		-40.2		1309.8
					1019.8	14.8		2970.3		-4.8
					2.2	1.3		-31.4		1767.2
					-15.2	-8		0.5		-121.8
					-2.7	-52.2		2079.6		99.2
					2.7	-4.2		-51.8		5.6
					1.5	41.3		254.8		-16.8
					4	-36		1767.7		1390.7
					-7.5	48		2610.5		17.8
					105.8	1006.3		-326.2		468.2
					2.1	7.7		128.8		1270.6
					16.8	15.6		3066.5		1857.9
					40.2	-13.6		2412.1		17.4
					-32.5	-2.8		2514		89.8
					28.2	665		6024.4		89
					5.5	5459.8		-6.8		744.9
					-2.5	-8.8		-28.2		3756.6
					5.2	231.5		3085.9		1432.2
					-12.2	1205.9		13.6		-7.2
					-6.2	-20.5		1.8		68.9
					-28.8	-44.2		12.9		29.6
					-16.5	1421.8		2414.4		2.8
					-10.7	40.2		-14.4		1795.2
					112.8	3393.5		4743.2		1438.6
					-4.7	2448.8		3769.5		3654.4
					6.9	3734.4		1891.8		1023.5
					1.7	3096.2		1998.2		-11.3
					2	2885.5		99.3		6.8
					16.2	1483.7		6214.2		14.1
					-2.2	3866.8		2646.3		135.7
					5.8	2210.9		3006.5		-16.2
					8.5	2088.1		1949.8		-2.6
					15.4	6.8		4915.8		1777.2
					6.6	5578.7		-31.5		-5.7
					15	3207.4		2377.9		1576.2
					17.4	959.3		-5.2		-7.1
					6.6	237.5		1694.2		2.1
					4.4	2784.2		1671.3		-28.8
					8.5	3143.7		1066.7		-15.3
					2.1	1084.3		5849.8		1836.2
					4.5	1326.8		3527		2716.5
					7.8	2941.3		4248.2		7.6
					-7.3	2132.5		1564.5		1.4
					-4	511.4		2299.1		-3.9
					-32.1	24.6		2494.3		-0.6
					-11.2	504.3		0		547.8
					-3.3	-15.4		-36.8		1173.5
					-11.6	870.1				7
					-23	490.8		5111.7		0.5
					681.8	2478.8		5345.8		13.2
					-3.6	0.8		4036.6		-15.3
					-1.8	998.5		30.6		321.6
					5.5	205.5		4403.2		199.7
					2.8	375.5		4590.1		2100.1
					1.1	16.6		4289.7		1682.2
					4.3			6317.5		610.3
					-7.1			16.2		-0.9
					6.9			5520.4		1.3
					-9.5			4052.7		22.8
					-4.9			5696.5		4.2
					188.9			-31.2		-21.3
					-2.8			4202.7		1689.4
					-3			6129.5		1404.9
					-23.8			77.9		1998.3
					2.1			2967.5		886.8
					9.5			3426.8		27
					-14.2			6620.5		-19.1
					-0.2			8379.6		-6.7
					-17.2			9461.5		11.7
					2.3			2506.8		947.9
					-4.8			7507.9		830.1
					-5.6			20914.1		1014.9
					8.8			5715.6		-23.8
					4			12482.4		4.2
					-17.2			2489.7		748.9
					-9.5			6734.6		-0.4
					24.6			129.8		3429.3
					-12.5			3157.9		1592.8
					4.2			-4		5.1
					-10.2			3533.8		-14.5
					-1.8			4642.8		814.9
					15.5			40.2		1045.4
					-1.8			3014.1		7.6
					8.5			3540		1303.8
					12.6			290.9		1262.8
					-3.7			3547.5		-31.2
					420.8			5974.7		-31.2
					12.9			70.2		1.8
					11.8			-415.6		-4.8
					5.8			3230.5		3491.4
					20.3			9502.6		936.8
					10.4			2448.4		1455
					10.4			-1.5		715.5
					-7.3			4230.7		69.8
					0.2			3646.2		12.8
					24.1			2928.3		-4.5
					-13.9			4616.5		1034
					14.5			2379.4		715.6
					2.5			4011.5		1435.9
					-3.1			8602.5		1.1
					10.7			-45.8		6.5
					-14.6			-25.8		-4.5
					-13.5			5725.2		522.5
					-2.8			10057.2		-23.5
					-16.2			610.5		1471.3
					-4.4			6937.1		1841.6
								7432.8		2103.8
								11428.5		39.4
								-1070.9		-31.6
								8263.1		4.1
								14645.8		1979.7
								-6153.3		-1.1
								8062.5		1455.5
								3284.3		9.5
								-91.5		1121
								4198		1867.5
								8423.2		150.5
								13800.6		-26.4
								4228.7		1428.2
								8305.1		-14.2
								12498.9		1212.9
								8679.5		19.2
								4432.7		1911.7
								3357.2		-25.2
								20707.1		453.5
								5743.5		186.2
								4609.3		5013.5
								-3746.6		-24.8
								5391		1478.8
								5901.9		1300.1
								6078.6		1285.5
								1909.2		0.5
								3969.5		4808.8
								8149.1		2042.2
								7587.7		12
								5164.8		-6.5
								9024.2		-39.8
								8083.2		9.7
								0		-7.5
								0		13.3
								21526.2		270.7
								30.4		2855.9
								5669.8		563.6
								0		2528.8
								0		893.4
								8637.3		970.4
								8191.5		-5.8
								14701.9		-2.6
								-2.1		26.8
								6140.7		56.2
								-6.5		1265.6
								5418.6		1.1
								9356.2		1719.5
								4450.8		1224.2
								102.1		659.8
								5344.2		326.6
								12157.8		15.2
								5896.7		10
								6254.3		-15.9
								24119.5		21.2
								15174		1.2
								5046.5		2776.2
								-72.7		20.8
								0		-4.1
								13473.9		959
								6073.2		1.5
								12108.5		125.7
								0.5		54.2
								-19.9		1874.3
								13595.1		2043.7
								7021.5		-0.8
								-7.1		9.8
								8847.6		540.2
								11286.5		-9.5
								11540.2		587.4
								3757.5		29.6
								4106.3		0.5
								3525.6		6
								4744.5		13.6
								9069.8		-7.8
								9805.2		3348.2
								9262.8		969.1
								14040		1817.8
								4756.3		-8.2
								3965.8		-20.8
								9281.7		-6
								8023.6		1746.8
								222.8		2024.8
								5722.3		2815.1
								5516.3		0.8
								7775.2		173.6
								-9.6		2334.8
								5168.5		-11.8
								6670.2		-1.3
								63.8		1502.5
								5665.7		-6.9
								3167.8		11.3
								6935.3		-24.8
								6016.2		-0.5
								4970.3		-3.7
								8428.5		0.7
								1074.7		1801.8
								-12.2		413.3
								5971.8		47.3
								82.9		-31.8
								4737.9		90.1
								7374.5		-2.6
								4576.5		1082.5
								20993.5		1850.5
								3971.9		3.6
								2605.3		1080.8
								12260.1		1234
								250.3		-7.5
								9.6		1112.8
								-173.5		3719.5
								3824.7		1401.8
								5119.9		1371.9
								108.5		1859.1
								5805.2		5735.8
								4925.7		5.8
								-43.2		312.6
								77.6		52.8
								1910		18.2
								9613.7		2871.4
								3962		360.8
								7045.5		32.8
								345.6		5.9
								374.8		-2.2
								575		511.2
										16.8
								5040.2		638.6
								4673.4		715.8
								5299.9		353.9
								6168.5		1261.8
								2841.4		401
								4445.9		4420.5
								5098.8		98.2
								-63.2		-60.2
								1810.4		-9.9
								6882.8		1186.5
								12024.6		-13.7
								-800.7		35.7
								6544.5		68.2
								6625.6		1103.6
								8041.1		29.9
								2335		1492
								10170.2		-1.4
								6680.8		3774.7
								9079.9		-50.7
								14175.6		76.2
								10.2		1487.2
								13128.9		1345.4
								12508.4		987.9
								6146.8		734.5
								17608.5		2195.4
								8457.1		39
								7871.7		3918.8
								14149.6		28.4
								11940.2		0.3
								2379		-2.4
								7880.2		1318.8
								675.7		-13.6
								1519.2		4.3
								-68.4		39.8
								2097.2		13.7
								11227.6		-35.2
								-48.9		24.5
								10440.5		-17.8
								-54.5		1.1
								3594.9		52.5
								4203.8		495.2
								4439		71.5
								13336.6		3553.7
								-53.4		2152.9
								13412.8		60.3
										747.1
										3386.4
										903.2
										6
										7198.2
										-21.4
										-25.7
										-0.2
										60.3
										1570.2
										806
										-12.6
										1620.4
										-50.9
										555.7
										20
										2.2
										241.6
										608.1
										725.1
										18
										-12.2
										120.8
										-18
										-31.5
										-2.8
										-18.8
										0.8
										-6.4
										-2.7
										24.8
										413.8
										-3.8
										1515.6
										759.5
										-9.8
										2287.8
										1266.2
										-10.4
										-11.8
										-24.3
										-28
										-6.1
										1133.8
										2081.4
										9.6
										7261.5
										-10.5
										-22.1
										-3.7
										1972.4
										11.9
										1827
										455.8
										-10.1
										-8
										9.1
										2401.8
										-11.5
										91.6
										1737.7
										89.9
										-7.5
										406.4
										717.2
										-7.5
										196.2
										-8.2
										-2.4
										1464
										1263
										898.5
										5.7
										1568.8
										2802.5
										-1.6
										1052.8
										-26.7
										-15.3
										-9.9
										-2.8
										-21.2
										-12
										6.5
										793.8
										387.6
										-4.5
										-20.9
										-15.8
										1465.1
										19.2
										0.4
										-9.2
										-35.5
										2238.1
										-10.2
										16.8
										2275.1
										23.3
										-20.9
										-2.8
										9.8
										-2.6
										9.7
										4.2
										530.1
										1.8
										604.3
										33.2
										4.5
										1586.8
										7
										2.8
										518.3
										-2.8
										43.8
										19.5
										18.6
										-17.2
										-42.9
										20.1
										2531.8
										98.3
										-8.2
										6.1
										27.1
										4888.8
										-96.2
										3050.5
										11
										12.4
										-19.8
										13
										-7.5
										-11.6
										-18.5
										2375.8
										892
										13.7
										-1.6
										-75.3
										1879.9
										2.5
										2240.9
										3960.2
										-11.4
										9.5
										2182
										3200.8
										-7.3
										-26.2
										3786.8
										15.5
										14.4
										28.9
										2395.5
										12.5
										14.3
										15.3
										-31.6
										5327.2
										2496.4
										3414.2
										-32.6
										4.8
										-667.1
										1.1
										10.2
										-353.6
										3.6
										2116.8
										-23.5
										30.5
										-1
										852
										-20.2
										-19.2
										1951.8
										6.1
										1596.1
										0.4
										28.9
										-4.5
										15.4
										-15.9
										2057.4
										-266.2
										2518.2
										20.3
										-12.2
										-1.4
										2462.5
										-16.3
										-4.7
										18.2
										0
										34.5
										119.8
										1340.8
										-36.5
										5092.3
										-55.8
										-24.3
										3328.6
										45.5
										-41.4
										-31.5
										-3.3
										3147.2
										2896.9
										3972
										-25.1
										-661.3
										-440
										3399.8
										-55.2
										21.2
										4789.7
										-42.5
										-24.8
										4493.7
										3354.7
										4158.7
										95.5
										2687.5
										-326.3
										1899.7
										2281.3
										1846.8
										-371.4
										1598.7
										-838
										1177.3
										-31.1
										86.2
										2283.2
										4182.9
										49.3
										1904.5
										-73.3
										1214.2
										170
										1700.8
										4359.4
										3029.8
										947.1
										-71.5
										1450
										2729.9
										0.1
										6677.1
										3326.8
										4465.6
										5198.8
										-138.5
										64.8
										3251.3
										-53.3
										3451.1
										58.2
										-38.7
										95.6
										38.9
										4688.4
										-6.3
										1949.3

## Sheet: Receptor-Repeat 3
Intensity at 72-ligand origami (co-plated with 36-ligand origami	Intensity at 36-ligand origami	Intensity at 72-ligand origami (co-plated with 16-ligand origami	Intensity at 16-ligand origami	Intensity at 72-ligand origami (co-plated with 8-ligand origami	Intensity at 8-ligand origami	Intensity at 72-ligand origami (co-plated with 4-ligand origami	Intensity at 4-ligand origami	Intensity at 72-ligand origami (co-plated with 2-ligand origami	Intensity at 2-ligand origami	Intensity at 72-ligand origami (co-plated with 0-ligand origami	Intensity at 0-ligand origami
-11	2.5	1608.1	-26.2	3842.2	-4.1	3403	4.1	1338.6	166.7	3325.6	-14.8
13.9	660.2	-1.2	-7	3259.4	26.7	2450	-4.9	216.7	21.8	4311	-32.2
129.5	3470.7	775.6	65.1	1370.5	36.9	-1.8	-1.5	40.5	1613.4	2018.2	-1.7
4191.5	-1440.9	-4.2	330.7	-22.6	8	-20.8	5.5	68.2	-20.7	3004.5	0.3
6638.6	568.9	-6.2	32.3	2251.6	-44.8	849.8	160.8	600.7	-10.9	-15.4	-6.3
1623.1	662	1093.3	176.4	132.6	-38.2	1679.4	16.1	-8.2	-23	3084	243.7
13376.5	-7.2	63.2	1.8	2242.8	-33.6	-36.5	-37.8	-107.7	27.8	1732.2	1657.1
11563.6	13994.5	-27.6	119.5	1132.8	-25.3	684.1	2.1	278.2	-13.8	2223.8	-196.6
5218.2	1362.9	744.3	470.2	1197.5	-46.3	-10.2	34.4	22.8	-20.4	1632.2	2122
-36.1	30.1	-23.9	-32.3	856.7	530.2	-32.1	-2.5	3863.5	19.1	187.7	1192.4
2033.5	5333.2	-10.5	-9.5	1345.7	22.1	1764.6	11.2	-85.4	951.9	3147.6	956.5
5413.2	250.9	1121.5	169.3	6.3		1566.1	48.2	2142.2	1581.4	2364.6	972.5
2664.2	512.4	2133.2	-65.7	-52.4	136.5	750.3	70.2	-52.2	66.3	2040.7	665.5
10.2	923	1125.2	39.5	988.3	16.2	71.1	-8.9	2100.9	-28.4	3041.8	3814.8
3062.6	-10.8	828.5	412.9	2210.6	-2.5	-48.3	-29.7	1610.2	300.7	3894.7	436.7
85.2	9	870.3	-8.2	35.2	43.7	1551.3	-11.2	4186.6	3738.3	4186.1	-48.3
10697.6	2341.2	420.2	-6.5	-21.8	-11.8	47.8	0.8	-106.5	584.8	1867.7	2588.2
3011.2	879.2	1209.7	-2.4	1025.1	4.7	2144.4	102.8	-12.2	44.9	2317.2	38.6
3468.8	33.2	147.4	-11.4	7.6	-9.8	1706.3	-1.3	2501.8	-58.9	28.3	61.5
3274.4	-102.2	789	142.3	2696.2	4.4	313.5	-23.7	-14.5	961.8	16.5	1041.8
5479.5	7480.4	-54	-14.2	-9.5	-7.5	296.8	-21.3	1902.8	-52	2293.3	-14.9
2997.5	3865.5	5.4	699.9		-25.5	2525.6	59.8	2195.1	20.2	243.5	4305.6
3.6	22.2	982.4	450.1	-14.9	57.2	1229.5	-21.8	1287.7	-8	1252.4	1547.4
-16.5	40.4	-31.1	179.9	1518.7	-4.6	735.7	6.2	1103.9	-21.9	1448.9	-99
13.7	2686.5	807.5	2657	1686.2	2672.8	2810.8	-16.5	29.1	34.5	1859.8	19.1
-28.5	-19.8	843.7	19.2	973.2	211.3	1832.4	548.8	611	5.8	5340.7	-27.2
2481.6	5137.5	95.1	507.5	4.4	70.8	4045.5	188.2	3914.2	-25.7	5397.9	-33.4
2896.9	10.3	1222.1	-55.7	1398.5	-12.5	564	718.2	3902.8	297.5	-7.5	2257
1.6	160.4	71.7	-31.8	1861	26.6	54	29.5	2286.3	-13.6	2435.2	3671.5
1576.8	-19.3	20.7	173.7	47.3	38.2	1661.8	223.5	1535.1	42.9	4686.2	1771.6
-33	1662.4	439.4	658.1	-14.8	1352.8	2671.8	710.1	3537	-127.4	1058.7	102.8
21.5	3385.5	496.3	34.9	1877.8	-26.8	-15.5	-4.8	2068.5	-479.5	2529	5271.8
3533.6	1263.9	1054.9	14	1127.8	0.5	-31.9	12.4	1377.5	1324.8	4884.3	494.4
2299.4	2808	1044.1	3062.2	1275.7	-7.5	1476.7	19.4	774.3	2078.6	1762.8	2.9
2703	0.7	610.9	29.1	2523.2	52.3	3031.5	658.8	433	2887.2	1679.4	10.1
537.3	-20.3	-10	399.2	2627.2	-22.6	2355.6	562.8	1234.2	3.2	-43.2	485.8
45.8	0.2	1617.6	24.2	1896.8	89.9	-14.5	-15.3	36.9	293.2	-36.8	1890.8
3205.8	-8.8	-3.8	215.6	909.2	58.2	97.9	-512.2	-27.2	76.1	2051	-36.7
61.4	413.2	1001.6	15.5	1438.5	32.4	2918.7	-38.6	763.8	-46.6	1179	4388.7
4258.5	-9.6	751.8	358.4	2512.4	1472.1	1213.5	84.7	-27	1412.5	1066.5	1068.1
-16.2	-6.2	2117.7	11.8	181.8	18	516.2	40.8	-57	14.8	-43.5	304.8
2231.6	2521.5	794.5	17.6	3894.2	1314.5	5386.1	-8.9	6.3	8.1	25.6	431.7
3942.5	-58.4	2489.7	-26.6	2619.5	108.3	-136.4	87.6	41.8	0.2	4233.4	4.2
30	1367.2	2935.8	96.8	1732.2	-1548.8	16.5	382.8	1615.5	33.5	-17.9	1268.9
4216.3	1098.2	1971	-25.6	3258.4	7.7	2059.2	168.2	45.1	-10.7	1633.2	-29.7
3658.8	-21.9	-34.7	360.8	4608.8	-135.7	1129.5	244.7	1730.1	904.9	0.5	-7.7
2640.2	-20.9	1416.8	-22.8	1195.7	77.9	-40.8	-141.5	101.5	-17.3	2448.2	6
8.7	1028.8	1061.5	954.3	1621.9	-274.2	-83.3	149.4	-17.1	-25.2	2503.8	-21.2
287.5	3.2	541.6	226.6	72.8	-141.7	1637.5	-4.6	535.3	167.7	3284	13.8
557.1	6495.8	1625.2	-9.3	2175.2	888.6	-62.3	-39.5	-18.8	218.5	80.8	401
-39.1	-39.8	1222.4	430.9	4791.7	0.3	1907.3	-149.3	1200.8	0.2	1377	554.9
-70.2	10.8	1846.9	1.5	622.7	-507.8	2112.6	732.8	-138.8	3.5	-19.2	1379.6
-10.7	2842	1188.2	296.7	1724.4	5321.9	1640.5	314.3	-14.1	-13.2	5.5	16.6
6792.5	-213.5	972.7	842.3	1807.2		1517	-243.9	795.9	-29.8	4391.9	3482.5
4267.8	3147.5	988.4	379.4	40.5	-32.3	1831.6	-205.5	2741.4	-9.8	-22.8	577.2
-20.2	881.7	1393.1	328.8	4071.4	-22.2	3491.7	-93.3	1400.3	95.3	5130.1	-11.8
3092.7	96.5	3172.6		2635.8	627.8	1515.7	-35.7	4813.9	-32.6	-3.7	629.5
5971.5	-66.6	770.3	238.3	-54.8	-20.6	580	8	1885.5	1697.2	3156.7	-36.3
-3	5081.8	1033.6	28.8	1165.8	-67.4	1467.1	-338.8	1275.5	-27.9	2334.9	1766.1
4064	5014.1	-33	18.3	1247.8	652	1579.9	638.8	-15.8	1.2	2521.2	-27.2
131.7	497.2	1611.1	28.5		128.5	2038.4	2	1748.4	-23.5	3490.1	13.6
3486.7	3033.6	717.2	26.8	3807.1	-62.6	3975.1	387.8	674.7	3.2	7.9	453.7
48.9	797.2	1465.8	-20.7	19.7	162.4	-63.6	3	925.4	13.6	1530	38.4
4915.2	-18.4	2787.2	-43.5	270.5	787	229.9	1565.7	2038.8	36	3316.3	321.8
21.2	6.1	2205.6	-4.1	2757.4	-59.5	1674.5	635.1	1153.5	17.4	2262.2	697.2
9245.8	1810.2	867.3	30.3	1436.2	3164.7	2082.8	12.4	1173.4	-9.4	3979.2	-58.8
0.5	918	1069.3	84.8	835	22.5	17.6	376.4	1.8	436.9	3684.7	144
-1.5	1523.2	-16.4	-5.5	-5.9	1313.4	1976	-96.5	3086	1600.4	-54.8	32.8
-35.5	-54.7	1029.2	4.5	3236.2	19.8	15.2	-4.6	3204.8	450.7	1595.8	1694.3
-63.8	1673	1687.9	79	4173.7	79	1667.6	-106.8	2322	-5.7	1692.3	-19.5
64.5	3247.5	473.8	-2.8	1587.4	1800.1	2848.7	778.8	2286.5	-21	1663	308.9
62.7	-20.1	3.2	-27.1	28.8	-140.5	1327.6	9.2	0.3	-15.5	1914.3	1570.8
7715.2	2252.5	16.3	1259.8	2348.3	361.2	2603.2	124.4	482.8	1602.9	-2.8	-40.7
-64.5	45.3	130.9	44.9	3752.7	-18.5	3761	-482.5	1721.9	5.8	1581.2	-39.5
4530.8	5560.9	2216.4	37.1	2867.8	51.7	1862.6	17.5	80.5	648	1748.9	196.5
3217.3	-31	1527.8	-27.9	27.5	-332.9	1766.5	-58.5	-22.8	-10.1	-24.7	-24.6
-251.1	1602.2	1275.9	0.2	2030.8	409	206.5	-13.2	179.4	-25.5	2210.3	-23.8
2365.8	-21.6	89.2	2377	3122.6	791.2	1700.3	-397.3	1764.5	1.7	7.5	-14.3
-449	3199.5	1279.8	1655.3	4762.3	37.4	1636.9	12.8	2060.8	-7.8	1863.6	111.2
7040.9	28.4	888	13.8	1215.4	-44.2	1834.9	117.7	1163.2	386.9	1794.2	-59.6
3653.5	4008.9	-39.1	-1.5	860.9	-9.3	1243.5	-59.8	-12.5	611.9	2577.8	-13
-302.6	2.7	1995.1	8.7	871	11	-66.1	-109.9	-5.1	23.2	1600.7	-33.3
3862.2	695.2	38.2	-6.5	2258.9	0	-174.5	483.5	-4.2	22.6	-8.3
-131.8	1.5	1050.8	-4.4	7084.6	19.7	-20.2	-49.7	-2.9	-23.5	-19.2	-21.8
2365.4	-484.5	820.5	-43.5	1647	-20.8	2517.2	291.8	54.5	691.9	2406.3	-25.2
10.6	0.1	894.1	10.1	155.1	-23	604.9	-6.8	-5.5	3440.3	1456	447.2
-12.8	505.2	16.1	-14	3230.2	1.1	-14.4	-26.5	-9.5	1037.5	1163.4	107.9
-691.4	459.7	1132.6	14.6	1025.8	22.2	1743.8	80.2	-0.4	582.4		853.3
55.1	-79.5	-23.7	1294.3	6670.9	22.6	506.4	67.4	784	-19.5	1106.5	352
4472.2	3052.8	1077.6	32.2	3451.3	-2.2	-115.1	-1.7	16.2	19.8	186.5	1005.4
19.6	19	-18	513.1	127	7.4	556.6	-73.5	4065.4	2.3	558.5	4.8
4450.6	-10.1	691.2	4571.8	2371.2	-25.7	4465.1	19.7	1641.2	136.2	-3.8	1066.5
3372.5	11.1	-65.6	1242.3	3496.6	-4.5	-21.8	74.9	1785.5	1995.9	90.8	11.8
6156.5	-11.2	955.3	-33.1	-27.1	-16.1	1371.2	-51.5	17.2	1010	2214.8	-19.2
3291.3	59.8		288.8	5050.5	916.2	692.4		2501.5	5	888.5	3246.7
-7	518	1228.8	40.2		7194.1	212.2	-17.8	11.9	841	4491.8	-39.3
13546.4	154.1	30.7	26.4	1387.3	1524.8	-22.4	7.5	905.6	-22.5	-5.4	31.8
1510.6	2.2	702.8	2.4	-14.7	19.9		-15.2	11.1	-12.4	1176.3	-16.6
6656.5	2233.9	1377.2	2076.7	4.1	283.1	1215.6	-6.9	-13.5	-4.4	-30.5	-1.9
-112.5	31.8	-6	-26.8	2156.8	-14.9	2435.8	-47.5	9.5	893.5	-50.5	314.2
4634.1	2809.8	-11	25.1	1128.6	296.3	823.8	-59.4	1839.5	-18.1	13.2	-25.6
6631.5	-403.6	-13.3	-62.6	1482.7	-31.3	1574.9	759.2	1126.8	-1.3	3468.8	9.1
2077.5	840.4	32.2	-40.5	3530.5	-15.7	1260.9	2369.5	0.1	-52.2	-36.7	40.8
-79.3	979.3	9.8	20.7	1104.1	4256.1	1411.5	-33.1	17.7	1173.4	-42.5	-8.8
38.1	1083.8	2000.2	-2.2	3709.9	-121.8	1731.5	257.4	927.8	-16.5	20364.6	-26.4
-19.5	2590.1	150.5	27.4	4550.5	-74.2	2842.5	-16.1	4.9	92.2	313	76.3
-55.5	3477.9	1930.6	-160.1	6303.5	344.4	-22.3	-0.6	133.8	-20.2	66.8	-6.4
3117.2	951.5	8.9	-13.4	2351.4	23.8	2284.1	-21	-12.5	467	780.5	105.2
6360	684.3	1057	-21.6	3469.8	267.8	2842.5	-18.2	47.5	1848.6	-34.4	1.7
1987.2	-90.4	12.4	968.8	5131.5	-89.5	-20.6	48.4	-2.8	-46.4	65.9	217
1511.1	-42.6	1907.2	-48	598.9	244.8	2607.5	16.8	608.9	503.6	-17.5	90.7
24	2128	70.3	-3.2	3394.7	-19.7	2799.7	-24.5	775.1	183.2	750.9	-25.5
-13.5	1669.5	-9.8	5	1017.3	51.1	1873.6	144.9	12.2	423.6	569.2	-8.5
7025.8	161.4	24.1	-43.9	171.7	-75.2	138.1	67.2	-19.2	-3.8	1620	-33.7
1817.4	1657.2	-40.8	610.5	1536.9		1435.9	129.2	1751.2	25.8	18	33.8
-143.6	296.1	1468.8	7.8	4002.9	15.1	546.3	46.7	1182.5	-42.8	24.5	-10.6
-15	90.6	0.9	21.4	1035	2398.7	4170.1	6.5	-17.2	437.2	624.1	11.3
10	-36	73.7	-6.9	2329.5	1529.8	1975.8	-174.9	-5.4	-65.2	-8.9	8.8
2424.8	-52.1	1862.4	1808.6	0	-473.8	-23.8	5	523.2	367.3	806.8	73.8
4572.7	5654.8	5.7	-4	2753.6	1192.7	2496.2	-81.2	-18.3	25.8	10.2	388.5
6793.9	495.5	207.5	2230.2	119.4	-66.5	2018.5	428.8	1643.8	25.9	-48.2	1678.4
11499.4	7930.1	2395.8	36.8	2914.8	3010.4	2241	-69.5	359.3	-15.8	1988.1	1.2
6497.5	6293.7	-37.4	45.2	-8.8	-384.8	735.8	-60.8	858.4	85.9	-48.1	29.4
2459.5	1854.5	2392.8	-187.7	2668	-520.8	-89.8	-1184.8	534.2	718	141.5	-12.8
5322.3	1583	4266.5	301.8	5431.2	-186.5	2339.2	1043.7	1654.8	-38.5	92.5	-40
6106.5	-17.7	21.5	35.2	4002.4	1736	-45.3	928.6	-41.5	-9.8	18.9	89.2
5640	473.1	4826.4	1062	3797.2	1611.4	2472.5	-338	110.8	301.4	-71	366.4
3202.5	-46.9	-8.4	0.5	1784.6	-905.3	50.7	29.2	-19.5	-18.1	174.5	-25.2
2536.8	-17.7	5.6	214.8	2246.1	934.2	66.5	-856.8	1336.5	7.8	4024.1	23.1
4344.2	5825.3	1048.2	1110.6	1979.6	3383.2	5685	-854.8	-15.5	-22.9	4.3	-40.2
2955.8	872.5	1311.8	-45.2	1383.8	2907.7	3109.9	-5.5	1	6.3	33.2	-76.8
3556.8	-6.1	-18.5	9.5	-12.4	-35.4	3375.8	648.7	-19.1	-19.1	1574.2	-33.3
5234.5	276.3	-8.4	448	-78.3	-381.5	2330.5	636	-9.9	188.5	-6.1	-35.6
4311.8	1879.2	-5.9	-32.2	1073.5	1226.9	1153.4	-386.6	2.5	45.8	988.6	22.5
-1070.2	5880.8	2378.5	9.7	1307.2	140.4	4894.3	68.5	-19.2	28.5	-21.3	-35.3
6476.2	569.8	2476.1	-13.8		21.5	1799.5	1025.5	-7.5	135.8	1.7	-39.4
3878.5	10554.5	1265.5	35.2	1048.2		1503.8	-243.4	-23.2	34.5	1600	-17.6
428.9	1871	7.8	-24.2	-35.6	-20.3	2742.2	506.7	-13	6.4	-15.7	-0.8
2.4	-17.6	731.9	10.5	1936	48.2	-208.8	978.2	-13.8	804.1	3.9	-43
6.9	740.2	1553	16.8	1255.1	355.5	2760.7	70.5	1949.8	6.3	-2.8	-57.7
-18.8	5.2	1751.4		1528.8	79.2	5834.5	520.6	868.5	56.6	1283.1	657.3
-83.5	157.9	-26.8	98.5	1100.9	50.9	3062.5	330.2	-25.8	481.9	1844.5	132.5
3118.6	1103.5	1687.5	4985.7	-78.1	315.8	865.6	400.9	2265.6	-21.5	1255.6	0.5
3605.4	408.4	17.3	2845.2	25.8	-24.3	8146.8	1049.7	-41.8	591.5	142.4	1.8
8489.2	2353.8	-18.1	2018.9	3793.8	15.5	981.5	38.4	1138.8	590.5	11.7	214.8
10059.2	3163.3	2458.6	341.7	7509.7	6464.5	4072	74.2	174.5	22.3	1455	-20.8
6528	1438.5	44.2	156.5	0.8	39.8	5	-26	-12.8	6	1300.9	-55.2
-1.4	2326.4	92.8	1445.2	1760	13.3	2504.9	-267.2	1111	-28.2	9.9	1.7
2545.8	-61	986.2	3194.8	62.2	58	272.4	-556.8	14.9	-4.5	-71.6	-111.2
-68.1	-68.1	5.2	-450.8	-5.5	48.7	857.5	613.2	-7.7	617	-63.1	23.2
5036.2	17.6	816.2	527.1	90.7	322.6	2669.2	1021.2	113.9	5.7	616.2	2247.6
3670.6	2023.8	3933.8	-103.5	6062.7	208.2	9610.6	175.4	0.5	-9.1	-70.5	4.8
4667.8	2186.1	1333.3	817.2	29.8	299.8	237.2	110.1	121.9	-21.7	69.6	207.2
4011.6	3091.2	149.4	48.2	30.2	257.8	617.1	-635.5	518.6	29.1	482.2	250.8
3527.2	-734.5	1143.8	1600.8	103.5	672.2	646.2	3682.1	14.8	45.4	252.8	-81.5
5558.5	29.2	2777.9	2927.8	13.2	-103.7	490.5	782.4	91.5	454.5	8437.5	678.4
8652.2	4160.9	464.8	-724.7	4566.5	100.9	1592.2	3086.2	1247.5	9.2	-46.6	-432.1
-63.8	1463.5	-30.4	-30.8	-12.5	-106.6	5010.5	2404	-76.2	948.4	12.2	4.6
47	2933.1	0.4	72.2	1642.5	1125.9	561.8	167.7	-1.5	696.6	1113.4	-29.2
-79.3	3359.4	-6.2	-61.4	-37.2	-785	2431.4	674.2	2019.3	30.9	2803.9	-26.5
53.6	1581	15.2	369.1	6.5	16.2	2946.7	-9	-12.9	-32.1	49.3	-27.2
6476.8	7003.6	1278.5	-27.6	1433.7	4124.4	815.9	540	1541.2	-17.8	-190.2	16.2
5883.4	936.5	2427.9	-13.5		-19.9	4104.3	112.2	1967	552.5	6465.5	-19.8
21.8	66.6	1231.3	459.6	20.9	-18.7	3729.8	389.1	-8.4	15.5	266.4	-22.6
11.2	13	2794.1	-28.9	-73.2	4468.5	188.2	28.5	11.6	1065.3	552.5	430.8
7.2	80.8	394.6	815	3447.6	2844.1	879.1	92.5	1027.7	733.3	4554.3	690.1
11178	1122.7	25.1	-38.9	17	49	2025.2	-45.4	550.7	-11.3	3147.7	-10.4
4216.5	1023.8	708.2	-21.3	1626.9	-0.8	1181.2	77.6	3864.4	21.5	-2.7	-54.7
7497.4	1534.2		28.1	2470.6	-3.7	4250.2	4358.5	-25.3	19.5	-43.2	-13.4
7732.7	1852.8	4803.4	251.5	3191.7	998.7	-88.8	203.5	758	239.9	76.6	1076.7
7158.1	15.6	2842.5	15.8	-114.7	1110.8	-369.2	-100.7	-41.6	98.2	3860.9	40.5
8411	26.8	7678.2	873.5	1612.2	49.9	1399.2	-126.8	-186	-25.6	-5.3	-5.6
3939.2	3776.5	4974.1	87.3	699.6	-31.4	1352.2	934.6	2341.9	16.9	5.7	99
2412.5	1262.8	1603	419.2	4312.2	164.3	1180.8	324.7	-28.2	924.2	-26.5	329.7
2425.5	1752	404.7	2428.4	1606.2	-60.3	2013.1	101.2	3883.6	223.9	2834.2	-78.8
5461.7	61.9	2606.5	1065.4	1254.2	253.1	148.8	-359.2	16.7	840.7	-63	-23
4513.5	18.5	3596.5	388.5	-97.2	4766.6	2766.2	-199.8	1638.2	-7.8	-53	68.6
5594.7	50.2	546.5		1691.5	-15.7	-3.6	292	1620.4	-20.7	-91.9	-40.8
8733.1	486.2	1664.1	2388.9	1975.3	47.1	-109.8	-532.1	3053.2	-4.2	283.9	-59
8019.3	2591.8	1961.5	27.8	3200.9	-64.4	36.2	269.2	379.9	772.2	21.6	961.5
14429	2416.8	1437.8	-11.4	3065.5	22.2	-739.8	-850.7	1758.2	9.2	-104.9	319.4
5498	-27.8	-429.7	11.4	2011.1		-66.2	-43.3	572.7	586.4	393.2	97.7
-28.5	111.8	5944.2	-28.9	349	-65.2	-85.7	974.4	54.4	-30.3	-53.5	0.8
1452	1770.6	3958	1389.2	12390.6	56.2	-245.1	449.3	1863.9	3.1	104.5	-34.5
2332.8	1322.9	3610.2	111.3	875.9	40.9	31	2635.2	2842.6	66.7	1244.5	-1.1
58.8	3580.2	3624.5	16.2	4975.3	273.2	5017.2	-223.7	-31.8	705.2	-168.6	-4.9
457.7	639.7	3338.5	27.8	2407.9	964.9	725.4	-64.9	974.5	-19.2	-49.8	23.2
2499.6	28.2	3996.2	20.6	7916.9	-7.4	7201.4	-3694.2	-42.8	13.1	-10.2	-107.7
3526.3	24	1116.8	3.6	1254.4	194.5	2249.7	-291.5	175.9	-13.2	1745.4	57.4
6803.2	2509.2	2415	-27.7	176.2	33.7	3919.2	-2849.4	1349.5	670.5	-14.8	-1881.2
3291.8	1263.7	3688.9	179.6	1785.9	65	496.2	2372	1034.1	661.3	200.3	-303.8
7830.6	19.5	1649.9	-12.6	2974.1	1079.7	2634.4	541.1	6.1	-10.8	1302.2	2089.2
-254.5	2791.6	3851.6	309.9	2628.8	327.3	3854.5	586.2	77.6	-11.5	13.4	43.8
-35.9	741.8	7.5	-5.6	2294.8	1258.8	4294	482.5	2350.1	477.2	1909.8	-21.5
149.6	3047.2	2051.1	1272	1756.2	-229.8	9617.4	-291.2	139.8	-25.6	1.8	187.3
-27	30.4	2660.5	928.2	288.2	-780.5	3545.9	-278.9	3059.8	1068.7	10.1	456.8
4257.1	-8.4	4462.6	1156.7	2621.5	-69	5160.4	-379.3	-19.9	-8.8	2026.8	58.2
2909.8	1086.8	2111.9	3207.8	-10.7	-93.6	-801.3	1705.8	2407.5	-3.4	130.5	56.9
2446.4	139.5	3127.6	1026.5	2044.4	1571.1	6178.3	-521.7	1843.3	15.7	21.4	-22.4
3917.3	329.5	-22	-52.8	2285.8	100.2	24.3	1493.5	-13.7	714.8	-13.7	-138.9
2675.5	480.1	2017	-13.5	1885.9	2440.3	12154.8	-43.7	1886.5	10.8	417	2762.8
2123.9	4705.2	4402.1	1438.2	-172.2	834.3	2508.7	-709.9	2424.7	-24.5	-267.1	15.3
2286.4	627.5	7950.8	5791.7	1252.1	804.7	-4155.2	-31.2		-33.2	1545.5	-71.5
2532.2	7931.5	4204.2	1799.7	2864.6	657.6	4921.2	-226.2	11.5	-16.1	-27.5	-53.1
2826.2	2121.8	3654.9	3248.1	1309.4	565.4	1868.8	-36	459.6	-4.8	-16.8	-31.2
3560.2	131.6	2473.2	1912.7	-6.1	2494.8	2916.8	-7.2	-2.9	-13.5	-50.2	142.3
2259.2	1084.9	2841.2	765.9	2843.9	124	2613.8	13.1	646.3	-33.4	290.3	-29.9
-15.6	-84.6	6768.2	1890.5	4040.2	1345.7	5107.3	-95.5	-23.2	183.2	691.9	-316.8
3498.6	3646.8	4639.3	-23.8	1283.7	-951.8	35.2	-14.5	-20.4	-5.9	67.4	594.1
1833.4	69.2	34.6	58.1	2194.1	5034.9	1838.6	-25.8	1201.7	9.7	843.5	72.5
14716.2	2688.5	-51.1	2222.8	682.4	2439.8	3569.5	-61.5	472.3	-17.8	1083.7	748.6
2294.5	3342.3	5946.5	-24.8	3091.6	1697.2	3484.5	5.5	23.6	37.9	2643.7	2248.5
2947.2	39.5	3762.3	-16.5	1703	366.5	4638.2	28.4	68.8	336.8	-288.9	3586.2
2820.5	988.6	1277.3	-26.4	1617.5	0.7	5192.5	-30.6	-9.5	5004.8	1782.6	-46.5
3073.8	461.4	1462.2	566.5	4800.8	-491.9	22.9	55.7	-15.9	7.2	-39.5	180.5
4709.2	58	1515.8	1529.7	-82.1	2227.8	689.6	15.2	18.5	392.5	-6.2	0.8
2801.8	5.6	799.8	1849.7	34.5	-13.2	1708.7	149.3	137	-7.8	1131.8	355.3
4799.7	-19.4	2438.8	433.5	1442.4	1581.3	3418.8	7.2	1263.5	68	329.9	48.1
2474.2	-64.2	40.2	442.1	2370.7	792.5	64.5	-602	17.5	119.8	1451.1	-133.8
-2	1054.2	1420.1	26	1.8	1062	2098	2042.3	1201	1470	5927.8	10
3653.5	1153.2	1697.2	227.6	10.3	834.1	1457.9	-205.3	-54.5	805.1	-63.6	-16.4
7166.7	746.3	2180.3	-7.8	2662.6	388.9	1722.1	418.9	-24.4	1365.5	132.9	-137.2
3316.5	1127.2	-45.5	-20.2	3000.7	-23.6	379.4	-10.5	1056.2	422.7	2667.2	264.9
2946	489.3	1928.5	26.2	358.7	1381.3	1774.9	0	448.1	-20	-198.8	4.4
3195.8	-19.5	1547.8	1690.1	0.2	1329.4	29.8	-3	828.2	89.8	-16.8	-29.8
1345.3	12.7	2029.2	-103.7	4073	-127.2	1575.6	-14.2	751.5	1074.3	72.8	80.8
42.2	1928.7	2766	405.5	2319.4	141.5	-53.7	-23.2	-3.6	8.8	53.8	-36.8
3135.7	1953.5	2295.5	391.3		729.5	1863.6	-24.8	697.3	-14.2	2586	549.1
3791	1810.1	-1.8	-20.7	2966.3	280.3	-69.9	-32.5	2475.6	1530.5	1316.1	75.5
3930.5	-13.8	-34.2	19.8	21.2	1402.4	1102	35.4	-58.8	-42.3	1002.9	-14.7
2207.5	2231.6	2495.8	-1.2	4422	1671.7	75.5	305.2	1415.7	-20.2	937.9	-13.7
3013.7	559.9	-20	4201.2	1092.9	1632.7	1399.2	-36	35.5	-6.6	1429.8	59.8
-18.5	1032.3	-16.8	-18	151.5	3406	-25.8	2.2	185	72.1	400.7	-89.8
2234.3	111.5	-20.4	-6.5	4.1	132.2	5.5	-51.7	18.5	-15.2	21.2	166.2
4003.3	5799.9	9.5	-466.8	14.5	3074.4	2785.4	-48.8	3.4	911.9	-37.2	2872.2
3485.6	168	199.7	24.3	2906.2	-54.2	3441.7	-295.9	0.5	-8.5	-17.8	166.5
7148.2	1354.4	-52.2	-0.2	-26.4	3247.2	6964.4	-122.4	1367.9	386.6	91.7	-222.7
5210.8	1254.2	-6.1	11.2	9.4	1918.8	4046.2	47.8	24.2	7.2	-46.6	-9.8
4038	2342.2		1290.2	2821.6	-52.3	5100	-89.3	1381.4	-15.6	1575.3	2480.5
2360.1	7364.8	2499.4	25.1	-1.9	197.7	3890.8	-50.2	2.4	1152.8	5662.2	189.8
7191.9	974.6	2933.8	529.9	-34.5	-21.1	11567.7	1219.9	-0.8	82.2	2458.2	-66
2014	646.3	872.4	43.4	2524	-332.2	2737.5	-14.4	-29.8	73.1	-37.9	449
958.4	46.5	19.5	-5	1799.9	16.6	921.3	-46.5	-12	-4.2	7569.7	-34.3
4151.2	2322.8	1904.9	5.2	1111.6	-53.6	23.7	566.9	35.8	46.7	876.8	-2.8
6150.2	3135.3	3032.5	32.8	2819.2	182.2	4981.8	-98.3	-14.7	16.5	-20.8	503.7
6441.9	1697.3	-18		-23.2	7.8	3533	97.3	11.6	-3.1	-131.1	1750.9
2376.1	1127.7	24.8	-14.8	-8.1	-34.4		1284.9	19.4	775.2	3415.9	655.3
-105	1056	1358.8	787.4	101.9	31.5	3.2	-7	-19.2	89.5	1966.9	928
4213.3	32.3	870.1	2834.4	10.1	414.3	539.4	-119.6	977.1	-7.9	2429.8	354.5
4790.9	9.5	4213.2	1.5	19.8	90.2	56.7	-51.8	46.4	855.1	2437.2	939
2975.7	13.2	24.3	194.8	8.3	-3.9	29.6	-67.2	-38.1	811.5	28.7	2705.5
6768.2	1555.4	3718.4	911.2	-16.9	136.4	1781.2	308.7	17.2	-5.5	25.7	-668.5
-13.8	1732	2402.5	505.1	1929.7	519.2	1308.8	-26.8	-2.3	-5.7	5164.8	-185.6
10	1109.4	5008	21.8	-13.6	1900.5	-8.7	1292.5	168.2	51.5	1539.1	24.2
4640.4	735.9	2380.4	-17.9	-6.1	61.8	300.3	-38.3	-15.9	329.5	1891.4	811.2
-504	2142.6	10.4	-25.4	1293.3	-78.3	-8	195.8	48.2	1040.1	-138.2	-5.5
3105	837.9	2928.8	30.8	1517.7	3355.8	438.8	72.5	13.6	806.4	2325.7	-277.7
3464.6	1232	1315.2	-31.5		-11.5	1861	-52.8	-40.5	34.2	3.8	328.1
8307.2	2345.8	1957.5	17.2	56.8	13	558.8		3.1	-8.2	-274.2	0
3639.5	1637.7	4060.8	1811.1	3485.5	577.2	12.5	2.9	-5.2	-78.7	-23.1	-368
2910.2	1332.5	1146.1	6.3	2977.5	-144.9	546.3	41.3	-21.4	44.9	-11.1	3.5
55.8	3431.1	3939.5	690.5	3834.2	117.4	-47.1	2.4	14.5	51.9	699.1	212.8
38.2	5554.5	2258.5	934.8	-22.4	2494	-41.3	-13.2	-8.7	2.2	873.6	377.5
36.6	2016.2	2805.2	724.7	32.2	-21.2	-8.8	965.5	38.8	7.5	-174.2	49.8
2231.5	1078.1	3935.8	406.5	1.9	-128.5	204.2	3.5	6.6	1.1	-464.3	-963.5
3836.1	3002.8	3501.7	500.5	5930.3		657.2	0.3	1264.4	136.4	954.7	2
3189.5	302.8	5798.9	-11.2	7494.6	87	952.7	-7.6	1.1	-20.8	1547.2	75.8
-114.2	465.3	2741.7	548.9	70.8	12.1	-0.2	49.8	1059.6	-8.5	-2.9	-905.9
4398.2	28.8	1526.2	1521.4	1801.6	835.9	801.2	20.1	35.3	51.6	-227	429.7
1800.1	1067.3	2524	515	5655.2	8.5	-51.1	30.5	39.8	125	3186	-8.9
3255.2	4340.3	1866.8	444.5	105.3	3379.5	331.9	9.6	-11.1	2.4	5192.5	3.7
2855	5976.5	1696.9	1371.8	444.4	292.4	678.2	-21.7	1183	3.2	-363.5	14.6
9105.2	174.4	2564.8	1130.8	3670.4	105.3	58.6	159.6	-35.9	-3.7	429.7	-618.3
4710.5	-26.5	4049.2	1094.5	55.6	65.8	-179.9	-9.3	2	-22.6	1234.2	3916.8
2671.4	849	-2.2	50.7	4866.2	-6.2	554.3	151.4	9.2	-110.5	-5	-10.4
4586	2385	3420.8	41.8	2710.5	6.5	-50.1	240.1	2.5	1739.9	-41.5	22.8
7090.3	1750.3	1072.9	313.6	5416.1	-55.5	-26.6	77.8	-7	-10.2	3522.8	1238.1
1151.7	3201.9	2965.1	885.2	4999.8	4.1	2031.6	9.4	1322.3	6.8	-164.1	90.8
2270.1	-2423	1820.2	2780.8		942.8	684.7	-7.5	1681.9	637.8	1307.5	592.6
1235.5	2.8	2788.2	6.1	-34.9	-17.5	1247.8	-22.3	-39.4	278.5	-7	-13.5
-6.7	-0.3	3307.2	1229.7	16404.1	-51	323.8	-17.5	1203.8	-35.4	1264.3	-9.8
4445.4	3251.5	1082.7	339.5	11136.5	0.2	217.8	-22.2	-12.7	3728.4	-1575.2	1534.5
2922.5	346.4	2920.1	-10.2	13231.2	-7.8	731.5	10.8	176	2549.9	2872.5	-73.1
1862.4	1169.6	2087.8	-6.6	-314.4	-13.5	10	-18	39.8	0.9	6658.5	-66.3
10524.8	3277.5	4152.3	-29.9	736.2	-15.6	11.6	509.4	-34.5	2591.2	286.8	12.9
2850.7	-4	4659.8	-9.6	13718.5	-15.1	1418.2	9.5	96.8	996.5	-4.5	-6.1
3157.1	2575.2	2328.8	-9.2	117.8	-0.9	56.1	-23.3	11.2	-22.3	6590.4	-24
4909.5	379.5	5140.1	457.2	-1.8	50.9	968.1	63	-31.8	-4.9	-58.2	761.2
2651.2	2423.1	2806.7	28.9	-95.9	1640.8	1035.8	9.7	761.6	-321.8	-20.4	-102.3
3700.2	2597.2	1300.2	-11.7	-13.2	-23.5	788.7	-22.6	-46.6	1588.6	-554.5	259.9
2094.4	2410.7	2454.8	750.8	11732.2	11.8	965.8	-4.7	-7.9	806.4	3.8	47.6
6852.5	1940.8	2290.8	1085.3	10069.8	-19.4	997.6	-28.7	642.2	2307.5	897.5	785
5242.5	1469.9	2514	77.5	9389.8	10.8	434.2	-19.5	11.2	3191.5	3510.9	7.2
2429.8	833.8	1803.2	-6.6	1231.4	25.2	140.3	7.2	-11.6	513	2524.9	-1.5
2496.2	-80.4	-13.9	2366.1	9395.6	-5.2		-8.6	6.5	2.6	2231.2	-28.2
3331.5	2869.2	-31.9	-8.8	6971.2	-25.5	3.1	11.3	367.5	3905.2	2290	371.5
2102.6	3127.2	-41.6	346.2	5863.8	-40.5	117	-58.4	-17.1	1414.6	530.9	-5
933.7	3847.5	7.4	426.2	988.4	18.1	-19.8	217.1	21.8	1137	131.2	51.5
3461.4	1113.7	1668.4	7.5	2812.6	-33.7	1096.6	83.5	-3.5	925.8	877.1	1475.6
3506	921.8	4915.2	580.3	13887.3		1177.5	19.7	-10	-226.5	-6.8	23.1
5012.1	12.1	1863.1		33.8	5.8	-9.5	-0.8	6.2	8.1	43	-23.8
4345.6	2622.6	1670.2	2540.5	11331.3	-39.8	12.7	-2.2	858.8	-4.2	-4.5	0.9
4657.7	1545.3	3474.8	542.2	33.5	9.5	39.5	23.8	-19	21.8	842	-8.4
7469	1166.2	1651.2	367.8	-192.3	592.8	-24.5	829.5	799.8	-8.2	1412.4	-12.9
3783.8	-93.5	1824.8	947.5	42	14.2	752.4	-2.2	1012.6	-0.8	1516.5	123.3
2115.6	1252.8	2079.8	-41.2	-38.3	1800.2	-3.5	214.6	-8.2	9.7	-45.8	-29.2
5294.9	2891.5	1429.1	871.1	2425	-346.9	27.4	38.2	1032.9	47.2	6	-42.2
-16.9	678.3	4691.3	101.7	9219.3	159.6	-6.9	26.5	212.2	5.3	1557.3	22
1825.5	-31.2	1719.5	-60.1	6022.6	-99.5	25.3	-25.6	1158.2	-0.1	-61.7	-15.6
5420.3	529.1	3021	346.2	2950.8	25.2	1031.2	-0.3	752.5	-153.8	75.6	7.9
4374	4102.6	6025.3	1401.8	1284.2	-19.8	163	5.2	-33.5	54.6	776.6	-5.5
4219.1	2401.7	-18.2	203.5	593.5	-45	1488.5	82.1	658.2	-11.3	795.4	11.4
12669.5	1968.1	33.7	695.5	579.8	16.8	2149.2	82.7	1256.4	12	1627.9	10.3
2551.6	2662.1	-27.3	516.1	1412.8	970.3	7.5	29.5	4.3	424.1	136.9	81.8
1690.2	660.7	2638.7	70.1	2182.5	60.8	937.7	559.8	2.2	1.4	371.6	3.5
2.2	1648.9	-16.2	2729.6	6993.3	80.9	2098.3	-7.5	-38.5	1437.5	-10.9	25.9
1625	20.2	15.4	-251.1	-538.8	-1.8	1191.4	108	34.6	379.2	1396.3	139.2
3776.2	1877.2	4.2	-20.5	6604.9	-50.1	-22.4	47.5	50.1	23	-17.9	-13.2
3587.1	3472.9	4.7	-118.1	303.5	-9.5	21.6	-18.7	684.4	26.5	1674.9	-25.2
2410.5	2406.5	-36.2	3020.1	-336.9		-13.2	135.1	168.5	46.1	-27.1	51.6
5656.2	2421.5	-2.2	163.2	-330.2	-175.1	22.8	15.1	678.1	436.1	648.5	-39.9
2873.4	2959.2	1219.1		2623.7	-231.7	1109.6	3.1	3.6	-18.2	1262.8	4.7
2121.5	788.2	71.9	-7.8	3628.6	261.4	-3.4	15.5	-3.8	-14.8	940.9	85.3
1603.2	1285.8	2407.5	21.3	494.2	8750.4	892.5	14.8	-20.4	7.1	-10.4	503.5
1944.2	1604.9	1792.6	-3.8	-100.7	-30.3	534.8	91	-7.8	92.5	755.5	-14
2289.4	-65.8	3390.3	-22.6	6253.3	4481.3	0.4	-20.3	-52.9	1112.5	397.1	7.3
4460.1	2	3857.5	-9.9	-277.1	4284.8	-7.5	-4.4	-61.4	162.8	1554.8	300
3213.3	-91.3	1822.3	10.6	112.5	-28.5	-8.5	30.5	-6.7	44.7	78.5	13.6
4465.3	2709.5	3958.8	18.6	2841.5	1109.6	1359.5	-24	-3.3	1000.2	-31.3	24.3
3302.8	868.6	-9.7	-11.2	773	-24.4	284.8	8.6	92.8	43.4	2830.3	3.1
4170.5	727	-8.2	-66.8	-745.4	-68.2	-10.8	14.2	-10	-20.7	355.2	5
2913.9	988.5	-36.2	-3	947.6	34.5	648.3	-5.8	-0.5	-12.2	-5.2	977.8
1594.2	1682	3582	234.6	-118.1	-7.2	703.7	-7.8	1020	839.5	-17.6	6.2
11.4	2806.8	-2.5	-69.2	2069.5	729.3	1212.3	-15.8	-21.1	711.3	1044.8	-0.1
3704.8	1873.4	1471.5	-74.7	3705.8	1646.6	-24.2	11.8	9.2	885.7	15.2	-7.5
4083.7	3038.2	-19.2	-18.7	37.2	5691.9	1102.9	4.5	42.8	-8.5	0.9	-30.2
3627.4	661.7	3522.8	-32.1	1296	311.4	-15	12.1	7.3		2091
2786.7	6027.1	-12.8	-24.5	1878.3	-63.5	-24.9	-36.4	521	3.1	-12.9	-25
4092	1222	2393.2	288.4	-70.1	147.6	516.4	-4.1	611.3	12.6	734.5	94.2
7943.7	-84.4	3162.5	76.4	3111.7	5813.9	19.8	-18.8	60	-5.8	348.8	3.9
2093.7	740.1	12.8	-14.2	2671.7	4353.5	-48.2	50.8	911.2	8.5	1629.4	28.9
4316.8	74.6	-8.6	266.7		-280.3	1272.5	8.6	-6.6	164.2	-10.1	45.6
3132.6	-58.5	20.1	752.5		15077.8	1365.6	4.6	571.2	-1.1	750.6	9.1
3042.7	51.6	-10.2	0.5		5301.5	651.2	15.6	1767.7	-5.9	837.5	8.5
3529.8	2214.2	4.4	926.2		4269.5	-17.6	-13.7	1697.5	71.3	1346.5	40.9
4466.1	420.5	3887.2	13.5		1235.1	785.5	-21.4	705.6	57.1	897.5	-16.9
4473.3	2602.1	130.5	786.8		2555	589.2	27.2	11.2	1091.8	1176.6	81.6
2716.5	1842.6	-17.5	-3		3518.9	-15.2	-30.5	42.8	-1.3	-12.5	-27
2362.1	-112.3	3218.8	64.7		-2.8	1001	536.3	266.5	414.6	1.2	75.5
2550.2	1174.1	3484.8	-29.5		212	1156.1	22.5	24.8	-3.5	2.5	-33
1239	1976.9	1.7	-22.5		20.5	-51.7	21.8	1266.3	3	1409.3	-176.3
2795.5	1097.8	3522.8	14.5		10.8	1063.8	-13.8	4.4	40.5	725.3	-22.2
6532.9	1424.5	-9.8	-40.5		-244.5	823.9	38.5	-10.4	57.3	1.6	281.9
3480.3	878	-21.5	1427.2		3080.2	-44.2	-6.5	1209.3	-17.5	676.9	27.3
8058.7	840.8	-7.8	557.1		5632.5	12.8	2.4	2045.6	-16.5	909.9	341.3
2521.3	-1011.4	-7.5	-146.9		122.2	2956.5	8.9	1.7	5.3	11.5	4225.2
5265.9	2508.8	28.9	159.1		-128.7	1391.2	-6.8	7.7	257.3	1.2	4102.9
6034.1	1408.5	2931	12.2		-299.4	1037.8	30.7	1054.2	5.9	61.1	9.8
3700.2	112.3	1329.5	-3.4		-367.3	2180.2	75.8	13.8	-25.7	-1.5	-246.2
4573.2	4502.2	2316.8	3.9		785.8	8.5	-22.3	8	28.2	-10.8	-44.2
6544.9	87.2	1476	607.4		483.2	3.9	-19.2	1856.2	-4.7	-18.9	90.2
823.9	216.8	2265.8	354.8		1860.5	2202.6	40.3	718.5	183.8	-29.9	-1788.5
3119.1	1653.4	3599.2	-12.5		3158.6	-24.8	-27	-29.8	8.2	1323	-7.1
3622.2	4288.5	4.7	155.9		2126.2	640.7	8.2	2.6	-0.6	1045.7	-46.5
3851.7	1508	558.5	1107.6		-542.1	970.1	-2	17	-28.5	808.2	-24.8
2894.3	3819.7	-16.9	2.5		-348.2	587.6	67.3	400.4	277.5		1226.1
4614.8	-425	3.4	62.7		-364.7	1946.9	60.5	1001.9	-38.2	4119.5	344.3
11445.9	5884.5	2620.1	47		171.2	1598.5	1.1	125.2	-1.7	106.2	-24.2
-633.2	261.1	53.2	183.3		1098.9	2.7	-24.7	-0.3	12.8	54.5	-24.6
7911.8	392.3	-11.9	467.8		1465.8	30.9	80.1	56.1	20.1	24.3	-251.2
10935.2	-108.3	1831.2	12.5		987.5	25.6	44.3	1228.1	-2.3	1919	34.5
6938.1	-192.2	3.1	-2.9		-402.7	735.1	19.8	10.6	-5.5	-9.7	30.2
10656.2	2.7	-4.5	31		-533	14.3	-18.9	43	-8.9	94.6	-6.8
3936	675.9	1886.6	-1.2		1687.7	8	-3.8	31.4	448.6	2686.2	50.6
12921.4	736.7	-5.1			4573.9	573.1	-2.7	774.1	276.5	2951.6	3490.5
2115.7	3097.5	68.3	-455.1		-129.8	-1.2	9.4	1233.3	287.4	-36	-465.7
2812	1954.7	534.9	427.8		-667.7	4.6	2.4	575.6	-16.2	-12.8	1070.6
3928.6	2222.8	24.9	8.5		137.9	678.2	-29.9	-17.2	-27.3	3642.4	-68.4
3555	3219.9	1.6	386		97.7	29.7	28.5	-14.9	8.4	3.8	9003.2
314.8	2274.5	1016.2	-136.5		697.6	-14	-0.1	890.6	-60.2	2433.7	-30.6
5657.7	1384.5	2461.8	-40.5		1301.8	758.3	3.1	1335.7	1446.7	2511.2	-83.5
5471.1	2795.5	-10.4	4763.8		1040.1	1040.8	12.1	952.8	6.5	2123	-2.4
4817.9	276.5	21.5	1865.4		-1498.1	1229.5	-2.2	491.6	-18.9	1272.8	-2.9
1391.6	2336	-31.5	753.3		-264.5	7.6	28.5	961.5	674.5	37.2	104.5
2319.3	2702.5	1948.3	-12.1		-259.8	343.7	2.9	1528.3	393.8	-6.2	91.7
8400.5	3210.5		804.2		304.9	1050.7	-46.2	-8.5	124.8	1781.4	90.2
2557.9	76.3	1894.8	412.4		81.3	862.4	1159.2	-0.8	532	2730.1	27.5
-159.7	1471.1	2813.6	1616.5		225.1	562	-2.4	6.6	4.3	-176	49.5
4388.1	3199.8	1399	1228.9		-280.7	-22.5	195.9	1279.8	-9.4	2549.3	-4.7
6405.1	1519.8	2681.6	1984.2		-267.6	1068.8	-11.8	-57.4	30.8	-37.8	-1.6
1713.7	3500.9	1357	922.4		378.1	992.4	356.8	777.8	25.3	-8.8
3291.7	610.5	21.4	65.9		1813.2	-0.6	-17.6	536.9	4.2	153.8	436.7
6319.7	509.8	1915.6	3017			714.8	33.9	-14.7	-39	1935.9	-129.4
10771	2064.9	21.8	2141.9			11.3	23.6	4.5	-29.9	-2.1	-2.8
5826.3	760.8	12.8	-43.2			623.8	-3.6	2.8	270.8	-75.8	11.8
4215.2	1920.8	1844.7	1080.5			-10.5	-0.9	599.4	1330.6	-22.3	77.6
3148.2	1929.4	1965.8	268.6			653.8	-22.2	921.6	-16.8	1056.7	90.4
6120	1280	90.3	197.2			1442.5	23	1031.5	-27.2	1983.2	16.5
3028	4271.9	1701.2	3496.1			-15.8	-18.8	-144.5	552.8	1279	-33.5
12353.9	1844	2487.3	0.7			17.6	-1.1	17.4	3.4	2412.3	-13.2
7786.8	199	9.2	1630.3			-12.4	-2.9	672.5	76.8	-16.5	-23.6
8293.5	2419.7	12.8	975.8			406.4	11.8	1296.9	-19.2	2711.6	9
115.4	-541.5	2289.1	-398.3			-33.1	-34	531.4	534	20272.4	-45.7
4069.5	767.4	1736.6	287			988.2	57.2	269.7	423.6	-19.9	132.1
3344.6	2692.7	3943.1	1787.6			939.5	49.6	20.5	-5.9	2639.2	-65.6
2418.9	1346	1251.9	2139.9			1004.8	-0.2	20.8	-16.4	5231.7	196.8
1250.5	4424	2240.3	-6.8			6.1	-16.8	1494.7	150	62.5	17.9
5203.2	1141.1	2523.4	13.5			401	-26.2	-16.5	835.5	959.7	32
6834.2	1455.8	3786.2	-1256.3			2.7	27.5	1402.5	512.4	964	1290.5
5107.8	590.6	-10.8	2413.9			851.2	0.5	51.3	353.6	-8.2	140.2
-21.8	1584.7	2104.3	447.8			-8.2	-6.9	1031.1	3078.4	1139.2	1938.4
5068.7	738.8	-10.3	884.4			0.5	-22	106.7	1763.2	-24.4	2887.6
3015.2	3623.5	-18.1	313			931.4	11.8	-58.2	-7.7	31172.7	49.8
6914.9	1487.6	1139.9	782.5			26.1	-30.8	13.3	51.3	4361.8	15.6
6067.5	4111.7	2456	2006.4			746.7	12	1545.8	293.5	-28.2	100.3
7305.5	-71.2	1261.5	925.9			2123.6	-18.4	1329.8	1239.2	-0.5	-2366.7
-1891.2	2013.5	-7.6	3977.2			615.5	33	1130.4	-54.2	972.6	5.7
3540.2	1868.5	2542.7	2165.6			18.8	49.1	1078.6	-97.2	101.5	-74
6939.7	1811.6	2456.8	1608.3			-1	8	-21.1	16.2	2415.2	-29.9
-246.5	2912.5	6.2	68.9			-4.7	-6.3	-2	1695.8	9980.2	6024.8
2304.5	7.5	1644.5	1709.4			-15.7	-17.4	850.8	-10.3	1132.8	30.1
2741.4	7941.8	2042.9	519.1			547.3	47.4	-35	29.4	23.2	-7.8
3338.6	948.8	1134.5	-19.7			64.2	-24.5	2131.9	228.4	658.7	-59.2
4089.5	1372.6	-18.7	-1151.9			33.9	-31.2	66.8	-8.8	101.8	3267.9
2457.2	1168.1	1643.8	493.4			2.1	-29.6	-28.2	38.2	-1758.4	-309
2983.8	3398.9	2821.9	3017.5			16.4	30.7	1466	82.2	7989.2	-14.2
3627.2	6790.1	17	306.5			1357.2	-1.5	22.3	-28.1	1144.8	-209.4
1829.7	-611.5	2341.2	871.1			860	15.2	32	279	9.8	4957.1
571.8	6537	1940.1	1209.2			1029.5	-2.2	1846.8	-48.9	-42.8	7.2
10314.4	-199.6	2177.3	1471.5			11.3	17	1176.5	8.9	872.7	-25.8
-44.6	1771.6	0.1	-70.5			-4.4	17.1	2453.2	-11.7	937.8	-11.6
2245.5	1609.8	2.2	46.7			7	21.2	2526.3	-5.8	12975.8	-4.2
2295.2	2215.6	1530.5	1404.1			864.5	25.1	2661.5	572.1	2500.5	1469.4
2470.4	5221.6	3703.3	734.7			25	-20.6	468.5	-21.7	2154.4	330.4
3675.2	1973.2	3283.3	3493.1			-18.7	-12.8	965.7	-6.4	3349.8	160.8
2645	-64.5	1609.7	-4			-19.6	144.9	1411.8	38.4	480.2	-24.5
-169.4	1199.5	3062.6	0.3			1591.1	19.9	26	-0.2	1322.6	914.7
1687.4	2160.8	1353.5	383.2			24.6	-9.7	678.2	0.2	1843.8	5.5
4625	2293.6	0	-5.2			648.6	-3.3	736.3	213.7	3197.4	46.5
3505.6	-2.8	-59.7	0.4			1092.8	-9.3	427	20.4	-61.9	327.2
2084.7	1440.8	3255.4	743.9			15.7	12	1605.3	5.9	67.4	-121.2
4706.5	1135.3	25.3	2608.6			782.6	50.3	667.7	225.1		148.5
7077.2	417	-19.8	1444.4			39	-6.2	1199	-29.5	547.8	20.1
-13.3	7786.8	2625.4	416.1			10.3	-25.7	5.8	627.6	2483	-32.6
3851.3	4460.2	-42.5	457.2			39.4	11.9	-5.9	-8.1	4331.8	348.4
2683.2	1472.3	-36.3	13.6			8.4	136.7	7.9	-5.9	47.2	926.3
4618.1	1109.5	3600	1493.7			1094.5	-18.9	823.2	162.5	23.2	292.7
6374.8	311.6	1980.8	320			785.8	0.5	14.5	55	-9.5	-14.9
1272.6	855.2	2180.4				765.8	-81.4	1191.2	286.5	-0.7	-119.9
4929.1	3817.4	7.9	1097.4			-26.7	12.2	699.8	2.2	-39.6	-45.2
12506.1	24.8	1977.6	0.8			-16.6	-10.5	4062.6	-18.3	-1.5	611.3
6307.4	5167.3	99	-26.5			3.8	-4.5	819.3	33.2	-20.5	-55.2
7786.4	1181.5	1795.7	-12.9			7.7	-22	9.9	-39.3	18.1	-23.4
4418.8	5009.1	2641.8	41.1			-10.2	-15.1	766.3	65.8	1203.5	16.4
3429.2	5394.8	1819.6	494.5			-3.5	-22.2	147.4	95	1726.3	2453.8
6386.2	2912.6	2136.7	1498.5			71.2	-29.8	-22.3	3.9	1741.5	-125.8
3738	-21.7	1995.2	768.5			14.2	-15.5	1697	9.5	2858.5	1157.7
4101.2	-29.2	-2.7	1593.7			359.6	186	294.6	17	1325.7	-33.1
4513.7	737.1	53.8	1753			21.9	-30	41.9	10.4	436.8	12.8
5995.2	1927	1739.9	-328.2			-12.5	-27.6	-21.3	63.2	73.5	35.5
2062	5223.8	2953.6	1206			560.3	19.8	-6.6	-6.8	19.6	1592.5
3558.9	1952.7	1772.3	1267.5			78.9	74.7	-25.4	3.2	56.5	-79.8
2589.5	990.1	-3.9	-16.6			39.7	19.5	2407.7	143.3	28.6	265.5
7016.5	2178.2	-18.9	1009.2			543.7	44.9	-59	-12.2	65.8	61.7
2507.7	2365.5	-21.2	7.8			-99.2	-24.8	86.6	-4.4	-27.7	58.4
2306.9	2034.8	515.1	-66.4			674.8	-34.2	3.9	-36.8	1597.6	-84.7
5648.1	2150.8	305.7	3025.7			-35.3	39.8	213.3	-17.2	-20.6	47.7
3427.9	2166.8	-18.4	2066.6			-30.8	6.6	1051.5	263.1	86	4695.7
2648.5	165.1	5326.2	1304.7			235	-3.6	-3	104.5	-43.3	2903.3
5773.5	678.5	1724.2	3090.9			-4.8	12.2	2.5	25.1	85.5	1868.8
2048.2	1560.6	3705.1	932.6			1034.3	8.5	-16	15.5	46.5	52.1
4209.8	1072.8	8.3	1284.9			15.2	-23.1	-26.9	-17.7	1739.2	-5.4
2576	83.2	2145.9	2933.2			-19	-2.6	1218.4	74.2	753.1	567.5
2272.3	1110.2	19	2135.5			515.4	16.8	2283.8	55	3200.8	-704.7
17.2	1972.4	1830.4	459.3			13.5	-36.7	919.7	-2.4	67	302.8
4230.4	1439.9	3029.8	2396.5			238.5	298.6	1276.5	10.3	-8	54
2773.8	955.3	2780.8	3671.3			938.3	-1.2	1261.5	-13.6	3250	1893.6
2357.3	1754.9	3597.8	552.2			730.4	-24.8	570.8	-7.4	-26.8	530.5
2353.2	3873.1	-39.2	8			28.5	3.2	1786	-14.2	22.8	1266
5465.1	3804.2	6883.1	0.8			1256.5	-122.5	13.6	-18.5	0	35.7
4116.1	1794.1	282.3	1448.8			-13.4	924.5	1442.8	17.6	-32.5	756.2
332	1273.2	1256.9	67.5			-50.3	-37.5	-12.4	90.1	1.1	-92.2
1789	2979.6	1188	1426.6			32.8	-33	-39.4	-8.8	320.5	1736
3810.7	2452.3	981.9	708.2			5.4	22.1	-46.3	55	9735.5	7.3
11.9	637.7	-50				4	-18.6	3.6	15.6	196.2	-297
-55.4	1547.8	-42.6				947.2	36.9	32.6	147.2	3368.8	91.2
9739.2	2017.1	1893.8				117.5	6.3	-20.2	-6.8	32.3	-22.7
4224.2	4193.6	79.4				-35.8	-103.2	40.5	30.1	-18.5	1286.2
3461.5	2318.8	1509.8				11.4	931.5	984.7	223.8	1422.2	340.5
2225.4	1564.2	1810.3				-6.5	279.1	-2.4	28.8	1810.2	1378.1
3870.8	1712.3	-32.6				-4.6	41.5	32.4	37.4	130.6	6883.2
3416.1	1586.6	3405.2				52	33	1227.7	123.6	7095.5	829.8
2109	2482.9	1230.5				-42.4	24.2	-39.3	800	1580.4	-5.9
5180.2	137.7	2419.7				679.3	-2.9	538.5	-13.9	1061.5	2136.5
6667.3	3435.1	1413.2				135.8	27.4	14.9	-18.8	-18.8	153.2
-43.5	-11.1	2252.5				2177.3	-25	91.2	-27.4	4.2	178.6
4401.3	1985.5	2459.3				2695.6	-1.4	1695.8	-4.5	-135.9	322.2
3161.2	-752.2	2967				1102.7	-8	1008.9	-41.5	2804.1	-77.7
2367.2	2396.8	1972.3				5.5	-683	12.7	-23.2	-24.1	138.2
2021.4	5686.9	1800.6				-84.1	95.4	502.2	-14	77.4	9.5
7158.4	3245.2	2373				84.8	-15.8	-18.9	58	132.5	38.8
5792.9	-488.2	1664.9				927.8	-13.6	1277.8	611.4	1.3	787.1
9.3	865.1	-9.3				58.5	178.9	923.6	1371.1	868.5	1097
9773.5	1672.5	-15.1				31.5	-8.2	-26.2	7	43.2	4.6
2964.5	3046.2	1310.1				4338.1	1.9	256	-23.7	2142.1	651.8
1224.4	1679.4	78				1457.1	1670.7	-11.5	12.5	1872.5	47.8
21.1	-49.7	2191.3				690.5	485.5	19.5	27.8	1702.8	4360.4
10963	-75.8	1171.7				2107.8	-108.2	1029.6	55.9	891.8	173.4
3487.9	2897.5	2550.6				1454.6	-29.2	897.9	-11.1	4476.1	2814.1
6388.5	2530.4	1557.2				392.2	19.6	18.1	64.5	-2406.7	-32.5
4325.8	251.2	899.5				-15.7	-32.3	-11.3	-19.6	-172.2	-333.3
3254.2	1342.8	-4.9				563.2	-206.2	1054	-14.8	-286.8	5988.1
4641.9	1366.7	-3.7				383.7	1.4	499.1	1.3	2239.6	377.7
-2.2	2804.4	1455.1				19.2	7.1	2169.2	17	510	-137
7512.4	65.7	1380.2				1464.3	-225.4	21.6	-13	1083.8	3124.7
3898.6	917.8	1330.4				423.8	574.8	-13.4	2699.5	2970.2	26.2
6716.7	33.2	1173.5				874.2	2.2	1058.5	-33	2366.2	-49.5
7765	3264.3	1690.9				226.5	82.1	1438.2	13	1748.6	-34.2
2272.2	1162.5	1350.8				642.1	-2.6	-9.2	-22.5	3846.8	1074.8
2908.7	483.2	2086.5				735.3	145.2	13.4	-15.5	1567.5	270.2
4710.6	3184.2	3258.3				24.7	209.5	1.5	31.4	-97.5	-2.5
4294.2	601.8	1394.6				2446.2	551	20.2	1.3	-68.3	36.7
5597.6	1600.2	2774.7				18.2	-22.5	830.1	-15.7	-74.8	3728.1
4907.2	4023.7	1434.9				180.9	14.2	5.9	45.3	3037.6	486.3
3596.5	4133.2	-7.6				-23.5	146.4	-14.1	-18.8	3118.4	3766.3
3847.6	641.5	9.6				48	83.5	18.2	-14	2860.4	23.9
7344	997.8	1788.2				67.5	-21.2	48.2	145.2	3201	-97.8
-20.7	8559.2	3581.2				557.5	-52.1	-4.8	-26	-4.6	958.2
12.8	432.8	3369				1013.4	18	-11.3	45.3	1934.2	883.2
3005.7	2270.1	1350.5				416.9	539	-7.8	14.8	1226.5	-485.7
5095.2	1922.6	44				263.7	268.4	614.7	812.2	-0.2	3833.5
47.2	1508.6	1593.7				-40.9	-39.8	1538.2	13.8	405	371.2
45.9	926.6	26.6				626.8	5.8	1008	-64	1442.9	1087
3332.8	1367.9	1362.5				1001	-39.9	-18.5	-51.6	1658.9	-53.8
2700.6	3129.9	9.8				788.2	972.8	45.1	128.4	2084.1	294.3
2948.3	798.8	-10				22.2	8	-11.8	22.6	1771.5	-65.5
2535.8	2806.4	1134.8				-44.9	141.5	-14.2	-2.8	2435.5	65.5
5160.2	4153	-19.3				78.5	-78.2	-10.1	1199.8	10337.4	2310.1
2340.5	2758.5	2263.7				19.3	111.5	75.3	69.7	1545.5	1.6
4424.1	2997.5	1691.9				783.2	-10	-8.2	5.5	0.1	15.1
1992.4	1419.1	-16.4				389.5	723.1	1662.5	163.8	-23.9	275.3
4555.9	-123.5	2328.2				14.9	806.6	2016.3	-37.2	2829.5	-27.6
2281.5	982.6	1840.9				986	-1	1624.4	376.2	-35.4	2094.8
3585.6	-94.1	1098.7				677	-9.2	1151.6	1138.9	-702.4	3173.5
4036.2	5056.2	-15.7				1234	26.6	885.5	92.8	48.2	-14.2
4231.2	1175.3	1829.5				-43.6	3.1	1252.7	-12.5	77.2	-457.8
3142.9	2542.8	1234.5				2272.9	390.1	20.1	-0.2	864.8	24.1
2623.1	43.3	3145.9				800.3	10.2	13.3	-9.2	1622.9	38.3
-24	3343.6	19.9				-18.9	409.1	1000.7	-9.8	2791.5	4953
-2.8	9300	3371.7				119.9	18.2	658.5	-108.2	1518.3	5354.8
4219.2	4409.2					900.1	-0.8	581.8	-22.3	3308.3	-569.6
3152.5	1710.8	-30.4				62.6	1404.7	2021.5	-49.4	35.2	82.4
3524.5	-48.8	2435.8				683.7	-2.1	2.7	251.2	3703.1	123.9
2130.1	2850.8	2554.5				19.7	-78.9	-33.8	90.2	-46.2	2034.2
-37.5	529.3	11.1				-59.5	-20.8	9.5	0.5	-1170.4	2350.8
18	2308.8	1719.5				235.5	1014.9	-7.7	-8.6	4415.3	-11.8
4070.9	-31.3	814.4				-10.5	-11.5	-18.6	13.6	1664.7	466.3
1588.8	1756.8	3141.8				200.1	-33.8	10.8	-2.3	24.8	1832.1
3580.7	1492.3	3259.5				5.2	4	-83.1	-28.6	79	55.9
7528.2	3266.1	647.7				576.6	26.9	-10.6	-3.8	2218.8	40
2015.3	3130.8	4146.2				564.3	26.5	-2.6	658.6	1752.2	1191.8
3557.9	3841.3	1212				431.7	-3.8	58.7	764.5	70.5	-36.9
1080.2	3740	2262.8				-60.3	221.2	13.5	27.8	2832.6	9.7
2458.6	926.8	1111.2				-12	7.8	68.8	-1.2	2525.5	11.5
3331.5	1128.8	1768.5				27.5	2.8	396.3	259.6	463.5	-72.6
1446.1	3213	2523				2	17.8	822.2	21.5	0.3	-0.1
-1.2	3553.4	-55.8				424.9	14.2	145.5	1556.2	2966.5	916.9
2904.5	-45	1290.6				1071.6	5.8	2906.2	8.1	-526.5	-30.3
2676.6	-106.7	1695.8				-23.7	-8.7	-0.6	-10.2	-18.8	-6.8
2880.8	-3	-77.7				44.3	46.6	-21.6	-18.8	1008	17.1
2124.5	3248.9	2193.6				-9.6	30.3	15.3	574.7	2373.2	-26.2
-121.4	2546.7	2895				3.7	2.1	1168.9	-33	3804.6	10.5
5136.8	5135.9	35.3				688.7	2.2	-7.3	-28.2	2515.8	-20.5
17.9	-108.8	529.6				2.4	9	1	338.5	2471.8	-51.8
-18.2	1488.7	2000				-8.8	-25.1	-31.5	7.5	-301.1	-20.5
3410.2	1658.8	5212.3				0.1	-8.5	3537.4	1142.9	-6.7	125.5
2700.4	-12.3	3044.5				615.7	-0.8	-10.5	145.7	-119.4	-2.4
4610.1	110.8	1278.2				535.9	-29.7	25.8	16.5	-483.5	-41.6
-48.3	1134.1	1240.1				-12.7	19.3	844.3	157.5	60.1
9085.4	1600.5	2762.2				-10.3	5.5	-4.3	8.1	-36.3	-6.2
6223.4	3150	2767.6				-18.6	12.5	-19.8	2.5	962.3	22.7
2522.8	4103.8	-36.6				-10.2	19.7	-20.2	-34.5	2902.2	-21.9
-7.7	10336.4	1025.2				-9.4	-17.3	-19.6	24	2121.4	11
15777.9	3220.8	101.2				-2.5	-19.8	-81.2	37.9	1386.3	-5.2
2256.4	2416.6	2128.1				743.2	-13.7	3	-0.2	4277.1	-44.4
4082	11346.8	3143.8				0.2	4.1	27.2	102.2	2646.2	-11.2
3081.2	1734.2	17.2				776.4	-0.4	2011.2	7	735.4	70.2
3547.3	1968	628.2				-26.9	26.5	886.2	-24.1	-14.2	-14
-43.2	-49.4	-64.2				-25.6	179.8	-2.8	-19.8	41	-26.7
53.5	611.9	-6.9				-6	-16.2	1394.5	-32.5	4.4	-12.5
4848.7	1047.6	2501.4				764.4	-21.2	-10.7	-8.7	-42.4	6.9
2965.8	2217	2106.7				7	28.3	24.2	154.8	1457.8	25
4309.6	438.7	1967.9				804.2	65.8	-4	-1.7	-60.1	99.8
-120.9	3996.4	2225				-27.5	8.5	1274.4	176.6	571.8	13.5
2029.7	2789	1219.6				6	-18.9	-2.5	840.9	40.2	-11.8
4690.2	2159.1	1280.2				-1.7	149.8	156.2	-15.6	-35.6	9.5
1864.6	3134.3	506.5				2	-6.2	663.8	327.7	-53.4	-32.7
7.4	2444.8	3313.9				95.8	1.5	1375	-3.5	-30	-8.5
1876.6	2939.5	968.4				-8.5	13.4	-15.6	531.2	2284	27
2562.5	382.8	4249.4				11.6	2.7	57.2	-2.3	-50.3	366.2
3191.5	2580.3	11.2					125.4	47.8	-1.7	1226.7	-38.2
2270.8	2583.8	1751.2				-14.6	-23.1	333.2	33.7	-457.3	20.5
5.8	26.1	2118.8				1241.5	-2.1	1770.5	891.1	861.2	28.8
6774.2	1572.1	3001.5				-15.9	2.9	-43.4	-7.7	428.3	346.5
3721.2	3006.1	1463.6				2007.2	32	4.7	-0.3	2200.3	-35
2769.9	2333.8	2310.2				12.1	-17.8	34.8	405.9	-2.4	-107.4
2323.8	3093.8	1873.2				1		-57.7	672	3.5	5.2
7449.2	1744.7	1898				-29	-10.8	5	346.4	-236.1	128.5
4250.8	2691.7	2600.3				520.4	60.5	1520.5	-45.8	184.1	968.1
5517.6	876.7	773.9				683.4	14.8	826.8	15.2	-82	35.6
1823.2	700.5	-173.2				582.3	317.6	-15.5	1407.8	1.8	47.1
2463.8	978.5	2808.9				-2.4	26.2	15.6	12.6	-986.8	-37.2
2741.8	1498.6	1022.9				1376.8	46.5	830.3	-17.1	1929.5	-6.2
4026.5	1471.1	2310.2				342.8	104.2	31.7	31.4	3847.1	-60.2
2538.3	710.2	1218.7				982.6	-468.2	-21.7	4.7	506.8	-48.6
-15.5	2828.5	1318.5				873.1	494.7	36.3	17	-11.5	2383.7
1817.4	33.3	2673.5				1420.2	23.3	-21.7	2218.5	7118.4	-22.8
3481.1	1032.4	-19.2				1625.8	-24.9	-23.2	3.1	88	12.2
-64.7	-93.5	202.5				-25	210.5	1862.9	-18.2	1209.7	-69.1
2817.4	1882.8	1868.5				-16.2	214.1	784.2	-28.5	-35.5	125.3
-39.4	514.4	2638.2				694.6	12.7	-8.6	3.2	2581.8	-3.2
3130.7	1637.5	961.8				1513.5	-274.3	15	-29.3	2985.7	39.2
6731.1	670.4	2976.9				561.5	341.5	-28.2	1172.8	73.7	-13.2
4676.7	-967.3	3751.7				2524.8	1.8	-3.8	598.8	24.1	-8.5
12987.5	828.9	15.9				38.1	66.1	-6.9	-7.2	120.8	-43.5
3351.2	-14.3	3136.4				5538.8	-8.8	49.2	619.8	-15.6	19.1
355.2	3473.5	-5.2				1614.4	-13.5	5.1	-0.3	1544.2	181.6
84.3	2693.8	-31				931.3	83.4	15.6	-68.2	2013.2	-36.6
3745.1	68	85.7				-28.1	6954.1	-42.8	-36.5	31.8	84.3
3782.7	785.2	38.8				90.3	50.9	1041.2	-28.1	216.4	-37.3
-10.4	3918	1367.8				40.2	-262.8	7.3	2524.4	74.2
1835.3	-24	1451.2				-176.2	125.8	-34.9	2939.7	-10.8	261.6
3308.7	3810.4	15.6				584.1	-53	-9.8	1280.8	-52.7	5.9
3520.1	2920					-19.8	-437.2	1253.3	632.8	9.8	13.7
-11.5	1643.2	23.4				1152.7	80.2	485.8	-14.3	-30.8	-1.6
-14.5	997.5	4.5				-1306.5	1038.7	-23	555.1	1551.5	45.6
1770	4910	1743.9				-19.2	-116.5	2.8	1664.3	761.2	-19.4
3008.4	221.2	5.4				1496.9	17.2	-26.1	36.4	23.9	-50.7
3889.2	3761.1	1868.2				206.7	-0.5	1129.8	1190.4	12.2	33
2196.5	3519.4	2466.8				1330.8	941.9	-13.2	2722.8	264.5	-8.5
1851.5	1218.8	2619.8				1357.1	1099.5	1.2	-30	34.5	-1.9
35.1	46.5	31.5				133.8	740.7	1075.2	262.7	827.3	-39.6
-13.8	-47.5	1525.4				1836.9	35.9	19.5	26.5	1404.8	551.8
4719.5	1675.3	-5.7				839.7	-108.7	-19	51.5	42.6	185.4
2396	1352.3	2816.5				1272.9	-141.6	-2.4	18.8	55.3	-40.8
3662.8	2505.9	6174.8				-553.2	39.8	-2.4	11.6	-28.3	555.5
2874.2	2283.5	7.2				57.9	-382.8	-9.2	-76.4	-80.3	13.2
1.8	-506.8	91				5471.5	1515.5	783.3	2849.3	1.1	49
2401.2	1319.2	3194.3				1132.9	779.2	-12.4	100	532.2	1987.2
	601.5	578.7				2952.5	-25.3	89.5	-54.2	1669.1	413.1
2.9	633.4	2774.6				3772	-1196.5	1719.2	358.8	3036.2	3536.9
743.7	2412.2	921.3				2303.3	753.8	30.2	42.6	1920.2	-51.8
1808.9	3614.1	-26.5				1656.5	-65.5	924.8	52.7	-17.3	16
957.5	3.7	-9.2				1602.8	716	-8.9	472.9	363.2	-5.2
-7.8	1898.5	-174.6				859.7	69.2	-23.6	348.4	1.8	226.1
-9.5	417.4	2335.3				8.6	129.8	19	557.2	57.4	170.7
1818.2	-73.8	1302.2				307.5	-24.3	-17.4	108.1	-5.6	10
1414.2	1927.6	2188.2				1445	997.2	-8.8	1766.8	17.2	-69.7
38.4	3139.2	941.8				1098.5	1029.3	-1.7	137.6	-13.6	-5.5
1705.1	-45.6	975.8				113	1206.2	69.2	3.8	12.2	-23.2
1801.5	-105.5	1457.5				3506.2	-93.6	-22.4	2.3	-6	3.2
2952.5	2207.4	3908.2				45.8	-30.2	-32	763.1	93.6	-17.6
-1.9	2103.5	2553.5				35	1518.8	1373.9	13.9	-9.9	-5.2
63.5	1090.2	1102.4				767.8	139.4	-4.8	411.8	-19.5	102.4
2388.9	3116.5	-7.2				1131.7	-17.3	-59.8	-66.9	-0.8	40.2
1526.2	993.2	-44				708.7	349.3	-16.1	-20	-31.8	-34.2
3053.5	771.8	455.7					801.8	-11.3	41.9	89.8	-18
2595.8	2409.1	2415.5				7.1	31	12.8	-6.7	42.2	502.1
1706.5	1949.3	859				378.7	-684.2	1150.4	-27.5	844.7	45
1712.3	6	113.2				748.2	170.7	8.5	137.5	2016.8	94.8
1564.2	3341.7	2201.8				833.3	91.9	38.1	13.5	1426.6	17.7
-10.6	559.6	2802				-16.9	-228	21.7	0	9.8	-60.8
2532.7	2075.5	2208.2				840.2	-869.5	84.3	837.6		890.8
1998.8	4.1	876.5				476.8	-21.8	-24.8	418.9	1446	-8.8
-10.5	-30.5	-42.3				4.9	1350.2	8.4	-28.6	1.2	-54.1
3237.4	-40.3	-72.8				19.2	2247.8	-7.6	1.1	-5.1	62.2
-39.8	-38.1	1659				541.4	-2.2	25	-10.7	1058	587.1
2813.1	-9.8	5179.8				940.7	-100.8	135.4	40.5	0.6	-61.4
-6.1	-54.8	5.3				496.1	1.5	7.5	878.5	14.7	12.7
-11.6	2890.7	44				-13.1	-1281.9	-47.2	7.8	-13.5	-14.1
2369.3	741.7	4.7				1220	-147.5	137.9	-63.2	1995.1	273.6
3.2	829.4	408.2				340.3	334.5	9	66.5	109.8	-2.2
1073.5	-7.7	4823.8				256.8	-16.2	84.2	1660.1	19.4	-20
2254.8	765	3.5				541.2	85.5	916.8	1158.4	844.6	38.8
3111.3	13.4	-14.8				1367.8		595.5	-5.5	1658.5	146.5
4610.2	7968.4	1544.3				6.8	-8.6	1264.8	-31.8	1364.6	727.4
1993.5	853.9	1499.4				680.1	8.2	-12.5	630.6	-40.2	-1.9
4653.5	32.7	709.5				25.8	15.3	-3.9	-27.5	55.1	113.8
35.2	27.9	1816.2				149.2	16.1	35.8	116.6	-37	282.2
2266.5	265.6	9				741	53.2	-0.9	-16.1	-18.5	1020.9
1301.1	0	-25.5				18.3	1.8	559.5	613.2	3.3	-25.7
1748.5	-39.8	11.1				1846.7	36.5	17.3	761.3	72.2	-9.2
3041	7.5	8.4				161.2	-34.5	4.4	879.1	4.2	-36.2
5.2	9	-14.2				2489	-23.5	21.2	271	1324.2	116.2
3525.3	24.9	1761.2				520.4	327.2	-24.5	810.6	2794.6	83.2
-79.3	243.5	3.7				710.6	-25.4	-3.1	62.5	2304.2	-6.8
869.6	-2.8	-12.6				1063.2	615.3	1266.6	-14	25.9	514.8
1513.5	1499.9	-5.4				8.8	-57.4	1349.1	5.2	1851.6	620.1
2156.8	-15.5	19.2				501.7	-6.3	1444.2	-35.2	-6.1	14.9
2827.1	1162.5	-35.5				492	156.3	10.2	-45.8	31.7	679.8
3587.2	1026	742.1				265.2	28	12.6	148	2737.5	637.8
3887.4	-19.8	34.2				1027.1	95	6	2081.5	107.5	-28
1857.2	3337	1609.5				-7.5	-67.1	1758.4	991.6	-18.9	611.8
1789.8	1437	9.8				1024.5	59.5	-6.8	903	1103.8	601.9
2508.2	43.8	29.9				15.8	1072.2	20.9	-21.5	1872.1	1226.6
1490.6	-30	1253.5				23.2	-8.8	1233.2	-28.9	1624.4	410
1274.9	1898.1	909.2				-2.8	9.6	-19.5	643.5	1285.1	823.5
1442	-8	2907.8				1207.5	-25.5	393.8	13.1	3327.8	822.2
3015	440.2	-18.9				-22.2	393.5	-19.9	-27	980.5	868.8
90.5	1791.2	1336.5				770.4	51.2	1788.9	5.7	2811.1	828.7
1889.9	627.2	5026				31.8	-26.5	92.8	220.8	2183.3	1.7
15.5	1277	1044.9				291.2	-75.2	9.1	8	1892.7	550.5
763.6	1018.4	1205.4				-63.9	334.8	1868.5	-65.6	-6.9	-19
2903.9	619.7	962.5				456.1	47.6	-2.8	22.7	764.3	295.6
2098.6	1402.6	1485.2				1069.6	33	-6.7	-21.6	174.9	738.5
1186.8	558.2	4				329.5	27.7	1059.2	1278.5	4170.9	1538.2
2162.7	405.7	2026.7				514.7	-8.7	515.8	1.8	308.8	278.1
1692.7	-23.1	1513.5				424	141.5	1408.3	925	422.2	941.6
2608.3	667.1	1118.8				42.1	42.5	-14.5	1140.5	3.7	490.9
2545.7	-18.4	-16.2				367.8	-42.9	7.5	16.7	1743.5	52.9
4873.2	1903.1	1612.2				-26.2	18.1	-18.2	58.7	25.6	704.8
-138.8	627.7	20.9				917.8	-110	74.5	-21.8	30.2	512.7
2439.2	1858.3	66				396	12.5	-8.2	178.8	4417.2	-0.4
838.5	779.6	18.5				1189.1	-1.5	-3.1	2353.7	1607.1	818.8
1725.1	954.3	2448.7				923.1	-33.2	-3.1	-25.7	-103.5	3083.3
1773.3	-25.5	3280.7				0.8	10.3	-14.7	-23.2	12	221.6
-2.5	2935.2	1821.3				8.8	10.4	1038.1	-3.4	1193.8	474.4
1618.4	-165.7	857.1				-42.3	-11.4	16.5	-46.5	930.4	748.5
1472.1	1744	4546.4				-11.9	7.6	7.6	176.3	804.8	643.5
2612	1286.7	3.1				395.5	34.4	1046.7	374.8	841.8	379.7
2581.1	1810.5	1359.7				4.9	60.7	-9.9	-27.5	2547.4	599.8
1610.3	1125.9	3126.1				645.8	13	-27.3	-27.6	-8.5	500.4
2315	-41.9	-18.4				-16.8		-15.6	488.8	2324.4	-18.2
1809.4	2.8	1308.5					3.3	34.7	380.4	1746.6	-25.7
5.7	3218.8	-10.6				1265.6	-22.8	-27.5	-29.6		566.1
3271	4933.6	1221.3				-2.8	-14.7	116.2	247.8	4417.8	616.9
2194.5	1669.6	2003.5				2439	37.2	781.3	8.8	-6.7	612.7
2233.9	697.8	1169.9				34.8	34.2	-18.8	-20.5	566.3	28.2
2115	634.5	1216.4				31.2	2.7	-13.9	-0.2	1373.5	46.9
-14.1	-50.3	-14.7				32.5	-0.2	847.4	26.3	-5.5	81.8
1505.3	728.5	1939.8				-12.2	-50.5	7.2	57.8	-21.5	572.4
2871.8	1790.2	2388				23.4	4.3	1771.5	28.2	2346.4	414.6
3666.6	-128.6	1469.7				1075.8	-12.6	-35.2	49.2	3551.7	954.5
-78.3	611.4	8.1				1484.8	-60	43.6	-12.8	-72.5	683.2
2143.8	120.8	1598.8				63.2	85.8	-22.1	-41.6	696.4	141.6
1157.8	3577.5	1994.4				34.2	5.4	112.6	253.5	1729.3	607
1795.5	2416	1276.6				2104.7	-33.8	18.6	14.3	1078.9	697.4
1711.2	2410.5	1454.9				10.8	19.5	-24.2	1392.3	1037.2	1070.8
-13.7	2970.6	-12.1				3951.3	42.8	16.3	-28.3	1959.6	363.5
2787.8	2478.5	1958.8				47.1	16.8	-16.5	-42.2	12.4	740.2
4887.2	896.6	1311.5				1662.8	53.8	-1.9	-98.5	1714.4	766.6
1744	1231.2	988				3353.4	8.8	2.8	-21.8	1284.4	480.2
2586.3	580.2	912.5				45.4	1.9	1025.8	466.1	654.5	861.2
1765.2	1178.8	1335.4				1862.9	51.4	-49	1544	733.5	1085.7
-1.8	645.3	1296.8				3975.6	-23.6	-28	735.7	5.5	-20.5
1767	643.2	1528.5				-1.5	78.4	762.2	30.5	640.5	314.3
1866.4	1194	699.8				2776.7	-7.1	29.1	-44	1707.6	-13.3
1715.1	1203.1	1043.2				2323.1	58.4	71.9	-21.9	2326.5	492.6
1675.4	297.8	1415.9				-1.3	-39.6	666.2	1940.3	2195.6	437.6
1303.2	1507.5	1388.3				2192.8	107.2	695.6	-28.1	1200.5	333.7
8.5	1.8	226.8				3.6	-61.2	19.4	133	1129.7	860.5
24.1	-35.5	1628.9				1249	31.5	35.5	-27.9	1164.6	282.1
2014.9	2075	8.2				-47.1	41.4	25.4	72.6	2560.7	178.2
2229.2	-31.5	1485.3				28.2	1828.9	-13.6	1.7	5475.5	520.2
3803.5	1016.9	2773.2				1483	814.1	1289.1	-29.4	1220.7	783.6
1674	1000.8	1102.2				1820.1	-580.3	2458.7	5.4	133.7	516.3
1066.6	981.3	1571.8				1513.2	31.3	24.2	1653.6	1280.4	500.2
3421.7	683.8	1701.3				739.7	305.2	1493.9	1018.5	923.3	340.8
2243.5	516.8	1918.7				2040.9	1557.3	1242.8	218	1094.5	614.8
2480.4	783.5	4584				4164.8	-50.2	932.1	-37.3	1502.5	808.9
2332.2	8.2	1058.2				3106	-55.2	2435.9	-0.1	23.7	459.4
4327.4	1646.5	2023.5				3100.5	421.2	-35.9	1006.4	725.1	251.9
1214.6	1824.8	484.1				2307.2	1071.5	1162.1	1679.9	1.2	1.8
1992.7	1357	1979.8				685.8	-92.2	-0.8	54.3	269.2
3564	1378.7	-82				796.5	2404.6	1121	-2.9	-19.7	-11.2
4385.1	1550.2	1278.3				2986.6	910.8	11.5	-11.7	349.7	-8.1
2125.2	741.4	1771.7				2316.7	115.5	-1.8	1211.5	-13.7	23.7
2882.5	11	1443.5				-11.2	-120.1	31.9	-13.4	3141	-22.4
-6.8	714.2	2682.5				791.4	7.9	5	-19.4	515.4	168.5
2308.4	24.4	2929.2				5530.4	50.5	-17.1	166.8	396.2	1943.3
1962.8	1414.7	2179.5				4296.9	1095.5	1493.8	53.7	-89.1	10134.3
1624.8	977.8	1946.3				1004	139.7	-2.7	-35.8	2831.2	163.4
1745	1206.4	63.2				5176.5	395.1	4184.7	-25.5	15.5	70.6
4568	841.3	1852.5				3460.7	-321.7	9	-23.4	-25.9	4940.7
2501.2	1.5	2036.1				-738.2	-92.1	40.3	23.1	796.7	861.1
1844.3	4300.2	-2.2				3150.4	84.7	96.2	-16.1	2107.4	1512.7
2221.2	1770.2	2662.7				2926.6	-28.5	4.2	4946.9	1252.1	174.9
2993.8	-144.2	2314.2				-171.9	-154.2	-10.9	0	-0.2	286.2
3818.8	1540.2	1885.9				3736.2	604.8	3169.2	26.6	1120.2	-38.8
-11.7	1385.1	2102.8				835.6	193.5	40.4	-29.6	1006.1	11304.2
13.5	1501.8	11.4				3213.6	67.7	-11.2	1100.1	36.9	1602.5
524.5	609.8	-16.7				57.5	11.8	64.9	121.5	2876.3
1167.8	515.3	756.7				1053.5	-227.8	13.1	633.6	-18.2	-25
2068.8	1008.2	-5.8				3407.8	199.6	-11.3	-51.7	558.4	1732.7
4611.5	851.2	1559.5				1167.1	-5.3	-17.9	12.8	806.5	506.4
2081.6	-11.2	1685.8				314.2	-171.9	49.5	1999.9	1970.8	429.5
6292.6	828.3	1361.3				115.9	-9.9	664	14.7	1482.3	-65.5
1766.5	467.7	1982.5				128	1930.3	2424.8	35	3715	-15.2
1934.6	350.2	596.2				2248	173.6	-17	-12.7	-25	16.7
1592.2	2168.2	1237.1				3669.4	101.7	-14.8	19.5	1367.7	-31.5
3289.1	1005.2	1032.4				2545.9	-61.5	-5.2	0	931.5	326.9
1997.4	1212.4	1375.5				1377.5	20.4	-36.5	-22.3	915.7	38.5
1792.1	563.2	1707.3				3326.7	50.6	1140.4	24.5	1813.3	1668.2
1379.7	-0.7	1649.8				2700.8	29	-22.2	591.2	-11.4	32.8
3070.8	991	1709.1				2788	609.9	31.3	-24.2	53	-38.7
-3.2	1294.2	-13				840.8	1830.1	612.7	-291.9	1082.2	-41.4
5251.7	-7.2	897.8				425.3	63.5	-25.2	880.5	1810.4	1345.8
1580.9	1085.8	2495.2				21.8	50.8	-30.1	629.1	819.2	-5.4
1736.3	1810.5	1658.4				-30.8	-154.2	16.2	12.8	8.8	2053
1831.1	1828.5	1880.7				3193.2	-76.7	4175.2	877.9	860.6	164.1
1857.5	1830.7	3525.7				918.5	-34.2	53	1072.5	3670.8	-36.2
1872.9	1018.2	1091.8				1141.1	512.2	-36.7	234.6	104.7	139.2
1570.8	1355.3	580.6				1202.1	25.6	740.5	-233.8	3835.9	1235.5
3692.2	656.6	558.2				-8.5	202.2	781.8	9.9	3732.6	24.8
2092.5	1929.5	1752.2				-45.4	-475.4	853.8	505	2218.4	5.1
2100.7	2.2	2001.5				-12.7	37	1690.2	1007.6	2930.1	-0.4
2602.9	1030.4	6.3				6.5	-180.8	-3	468.2	2020.8
1944.2	1133.8	2448.7				1655.6	-16.3	1519.7	102.5	-53.5	160.2
3061.3	1317.2	1553.8				3035.2	15.2	-25.1	-4.2	2425.5	286.5
2200.6	3954.9					4256.1	1846.4	-5.4	214.5	2285.3	22
2185	626.4	2919.1				533.6	-270.7	1225.3	-142.4	2231	50.5
3362.5	303.9	0.6				2642	-299.6	1523.6	11.5	2582.7	-79
3119.6	1029.3	-33.7				1695.2	2024.3	1918.5	821.3	523.8	-275.7
1897.2	842.5	6.5				2012.9	-5.1	-37.5	725.9	1915.2	1003.5
3412.5	885.8	2046.1				1555.5	-15.5	1150	-1.5	-62.8	444.7
2634.4	1250.4	-22.8				815	1178.2	-33.9	4015.8	2248.8	1066.6
2263.5	2645.9	2493.1				36.7	40.9	1159.8	1885.6	2386.5	-250.8
1088.1	763.8	2073.4				1831.6	-36.3	-15.7	-63.3	2200.1	2.2
2380.7	11.5	1411				1612.5	-98.5	2	48.8	3027.2	-37.1
1184	928.5	69				1431	-99.4	39.3	94.3	1627.3	-214.2
2557.5	1578.9	2114.9				-58.6	92.1	1737.2	27.8	4756.5	1407.7
3157.8	1093.5	1858.3				1831.1	-50.2	-0.5	10.3	1032.6	198.6
3379.5	817.5	2834.5				1208.6	679	1654.3	1084.1	2574.4	751.3
2571.8	739.1	2585.7				-46.5	-40.8	807.6	506.8	2246.2	25.6
1951.2	1831.9	2419.5				896.1	-2.3	10.4	190.6	2497	452.7
3859.7	10.6	1861.1				1990.5	517.4	5.2	322.3	-11.6	715.6
2731.8	-130.9	3253.2				779.9	80.5	1249.7	1391	3549.1	-22.9
13234.7	4241.4	4.5					1700.4	782.4	574.6	3240.7	35.2
1049.8	930.2	2651.3				2565.8	1178.6	-29.8	1104.4	2568.8	1900
2373.1	3188.2	1885.3				1211.7	9.8	11.7	2090.5	2527.6	81
1498	-3.6	1561.3				-44	27	-15.6	388.2	3772.8	-29.5
1119.2	-64.5	3107.3				2163.5	1517.2	2.7	-1.6	2846.1	1403.6
70.4	342.7	3481.7				1249	23.8	701.7	1139.6	-6.8	-44.4
2369.6	1374.2	16.8				1159.4	-93.3	1340.2	681.4	2105.8	-379.1
2163.1	3046.8	1926.1				-19.2	15.2	1136.9	-11.6	2450.8	458.8
1987.5	2436.5	2064.2				600	18.2	2119.5	-33.8	1848.3	169.1
2056.6	11.6	1457.4				1033.2	24.2	7.4	-19.3	3341.2	59.6
3546.1	2496	5707.3				406.6	-37.4	-33.2	1481.5	7.7	-23.2
1485.4	2083.8	3703.5				442.6	-10.2	2007.5	35.6	3194.8	75
1574.4	501.5	1536.3				1696.9	202.2	27.3	10.8	1523.3	-59.5
2265.5	760.8	2065				9.5	7.6	21.8	25.5	3096.6	-20.5
1514.3	1101.5	2210.9				302.3	-1.5	2673.5	-17.4	1669	26.7
4791.6	1261.9	3680				1091.5	-4.2	127.7	67.6	1599.2	50.4
2327.4	600.9	2482				20.9	-38.6	1368	18.2	217.2	46.2
2472.5	2189.3	3205.2				1651.5	6.5	39.2	-74.2	-29.2	4.8
3018.2	-20.2	2087.5				-2.5	-38.1	-17.9	1270.5	2497	7.2
2977.6	638.7	2004.3				449.2	-55.8	1.2	593	2173.6	-10.2
692.4	1367.1	4836.2				56.3	13.3	2445	-63.5	3354.6	57
3804.7	1460.1	3185.2				435.2	28.7	-24.4	-30.7	2890.2	16.3
1756.8	-100.6	-102.9				3.1	-27.2	-25.2	493.5	1908.9	104.4
3075.2	1088.2	-37.8				-47.4	50.7	957.7	640.6	-13.3	231.8
1742.5	684.4	2013.5				728.5	10.5	13.6	-64.8	-9.8	-6.8
2118.4	2137.8	3342.5				170.5	44.8	2308.8	464.9	4521.2	7.7
2587.2	2724.9	3146.1				-14.9	-44.4	-29.8	142.5	2719.5	-15.8
1009.8	1387.6	4060.2				1335.4	72.8	886.2	13.1	-24.4	-11.8
3560.7	611.8	3015.5				962.8	11.1	11.2	-120.1	2375.6	12.9
2711.4	2786.9	4082.5				-3.2	-15.3	970.5	21.6	3665.3	9.9
3238.1	2513.2	2604.2				8.4	-1.5	4.3	1000.2	77.4	17.1
1683.7	2214.4	4123.9				711	100.8	-17.8	943.8	3302.9	43.5
1860.3	1009.2	3491.4				12	6.1	-18.4	2800.6	3019.5	-17
4173.4	3154.8	2617.9				1039.5	19	1048.5	951.5	2191	-24.9
1670.5	1071.9	3268.2				-22.6	-1.8	1900.5	287.8	-6.4	-24.5
1549.3	616.9	1805.1				-71.9	8.5	1542.5	38.7	3046.5	-4.5
1838.9	591.2	1072.2				3.2	-38.2	1034.6	757.1	2982.5	8
2095.6	-45.9	6585.5				-25.2		1063	65.8	2205.4	376.2
1189	266.7	2023.1				187.5	22.8	7.2	507.4	2408.8	597.5
1941.1	1083.1	2447.1				-15.8	55.5	36.8	1009.8	2212.8	-40.8
1876.2	3610.5	10836.5				482.8	1.5	888.2	-305.8	3255.7	717.5
2296.8	2288.3	1724.2				12.2	-78.6	-72	329.8	3468.6	-24.6
4063	1493.8	3706.3				456	-6.5	673.7	-60.2	-10.3	-1.9
2500.1	-22.5	3210.8				1842.4	13	-16.9	1068.7	-51.6	850.2
882.5	693.8	-55.5				406.5	1356.5	1030.6	1412.2	2425.6	-12.8
3704.7	-37.2	1.2				-17.5	35.5	10.3	937.2	2268	-29.3
1900	551.6	1774.2				498.9	247.5	32.2	38.2	2367.5	-3.3
1131.9	932.1	1890.2				1061.7	28.1	-10	959.9	-12.8	5.2
2812.2	4701.4	1471.4				7.9	68.5	-10.8	-37.7	4829.7	187.9
1587.3	306.2	3386.2				64.2	56.5	-24.3	-38.2	36.4	65.2
1717.8	1169.4	4403.9				94.6	4.2	-2.9	4.9	1226.5	-129.5
1782	524.8	2172.3				93	47.4	46.5	69.6	1781.3	287.2
1009.5	1840.7	2955.8				1418.6	7.5	2862.8	-32.8	5.3	-23.8
1717.5	649.3	2838.1				1188.9	-37.6	2361.8	-34.5	2626.7	-2.5
2005.9	1247.4	3281.1				204.7	3.2	52.7	627.6	1753.8	1.2
1700.2	1226.8	2793.4				1012.8	-47.5	702.2	590.2	1716.2	4.4
2395	1180.9	3553.9				-37.4	26	-25.4	769	2090.2	158.7
1273	3439.5	4853.4				25.7	-18.5	1039.7	1.5	906.1	188.8
1792.5	465.6	2104				-28.5	-1.1	-9.2	1.9	2214.3	-13.6
1955.6	643.8	4099.8				767	61.3	1707.7	37.5	-11.6	-26.7
1957.1	1239.8	3884.4				1177.8	16.3	-43.1	531.8	2201	8.9
1952.3	752.6	3491.1				1849.4	-13.5	-28.2	2014.3	2281.4	0.8
3267.1	1674.8	2506.8				370.1	-21.2	-58.3	335.5	51.2	-21.8
2802	1125.5	-34.2				93.6	-11.6	-9.5	1072.7	1585.9	-5.2
2686.5	795.2	1940.8				236.2	-32.8	11.8	1529.6	1029.7
2598.8	-0.4	2772.5				-24.4	44.8	-9.7	17.6	1066.8
2748.1	356.8	1926.8				-9.8	-2.4	1069.6	46.9	2247.8
-153.2	5401.4	2923.9				353.2	-11.6	1174.8	274.6	-2.8
5884.5	620.4	1335.6				866.4	25.6	1365	1562.5	26.9
4274.9	1190.9	3907.9				-4.6	-4	2373.5	530.1	1629.8
5785.3	1011	2912				555.2	22.9	28.4	-2.4	950.1
2864.9	1130.5	3170.5				-19.2	16.4	-40.8	805.1	1288.1
2637.3	352.8	3849.1				2.3	58.8	702.9	514.1	204.5
1602.6	363.4	3412.5				558.1	48.2	35.8	467.8	1018
1204	1502.2	2015.5				768.8	-84.2	1613.9	818.6	1763.2
-10.6	513.8	1708.9				-21.5	262.1	6308.5	778.8	1440.8
858.4	1107.5	1221.9				1166.2	45.5	1527.8	867.2	747.3
-3.2	285.6	-7.9				-1.2	138.8	1360	572.9	-17.5
2496.6	3245.5	2690.8				870.7	40.2	2477.1	-17.6
1135.5	976.4	2229.2				510.6	58.5	14.5	0.8	1715.9
2387.2	765.5	1582				1509.9	-4.8	40.2	-7	-46.2
2488.3	1219.8	2597.1				-33	96.5	2598.4	1133.8	-20
1299.2	443.2	2391.5				578.6	656.5	-10	1292.3	11.9
2440.1	1773.7	3788				269.3	15.7	17.7	53.1	1309.5
-36.5	1241	1969.1				93	51.8	1126.3	29.5	19.2
-18.6	1183.2	1615.6				744.5	3.3	2464.7	41.2	13484.9
2737.5	-0.6	3686.8				46.1	17.9	4508.5	20.2	56
2473.5	1750.5	1573.9				419.7	6.8	-3.8	-12.2	670.2
2372	1681.1	1308.5				16.7	2.8	2444.6	18.7	925.4
3196	3824.6	19.1				802.1	297	1724.7	548.8	2181.6
1422.5	3485.1	539.5				188.4	80.2	2219.6	234.2	7823.8
2282.4	1762.5	1995.5				2925.4	391.5	1702.7	1129.9	-71.9
69	365.1	1902.9				690.6	14	15.6	1299.3	10357.6
895.9	6906.5	1258.3				220	-10.7	-33.2	-20.9	1399.2
16.8	3624.5	5821.6				167.5	-0.8	-26.3	534.6	7905.2
1795.9	-753.1	2751.9				918.2	2.5	-37.5	47	3058.8
9386.2	1220.2	1925.2				-5.7	27.2	-3.6	26.2	6993.3
1455	825.7	3092.8				437.4	17.2	-26	-18.5	-64.5
2398	902.2	2163.9				31.5	-18.8	120	10.2	1246.8
5598.7	1939.3	7527.2				-12	294.1	-38	-26.1	4571.8
4679.9	996.2	5026				1823.6	280.6	1088.2	-0.3	2052.4
4938.1	4334.5	3.9				-73.5	-3.5	2004.1	798.5	168.1
3149.2	2742.6	2201.2				385.1	-29	-0.2	961.4	3414.1
3590	232	1746.2				621.3	-37.7	75.2	959.9	2751.5
2871.7	551.5	2353.8				680	5.3	31.6	-32.8	42
3885.3	1737.7	-10.1				1006.4	-4.8	15	7	-21.3
4541.9	-85.5	1893				500.9	448.2	843.9	-5.1	13479.3
3229.9	478	2417.6				3776.2	16.2	103.3	6.2	2475.7
3988.9	1974.6	1050.5				537.8	9	869.6	6.8
2109.5	875.2	1.1				771.3	32	86.5	8	3340.2
3021.5	3111.4	2395.8				467.5	-21.9	1794.8	1102.8	3700.3
1847.1	-139.5	1754.5				730.9	15	2845.8	-43.3	3551.5
2314.6	2217.3	3643				11.6	100.4	1659.2	10.5	19.5
1270.8	1059.2	3600.8				1648.8	-40.3	1670.2	514.2	2462.7
1642.8	990.2	2670.7				797.7	-71.7	3728.6	50.5	43.4
1296.8	1755.1	42				459.2	1182.2	1147.7	1623.8	2.8
5744.1	-92	1643.7				461.7	-14.3	1215.4	460.8	-4.4
2652.6	772.9	3047.4				184.7	-16	-11.5	1267.9	-7.8
2952.7	318.5	-5.8				-11.8	28.1	-26.2	-52.8	3223.3
3281.8	-36.8	2782.9				290.5	13.1	-136.8	11.2	2595.2
1481	1853.2	1475.3				625.4	851.1	1948.5	-26.2	2125.2
-172.2	1024.5	1251.5				218.7	2.3	-66.3	819	-19.6
3872.2	2878.8	900.5				686.9	4.1	5.9	3342	204.8
-223.5	1281.6	-28.4				1448.5	122.4	-78.7	883.2	29.8
344.1	1293.6	2355.1				56.8	-3.8	32.3	2011.8	1.4
3029.6	1529.5	1921.4				7.5	-1.7	266.5	477.8	-16.8
3099.2	6353.6	2049.5				-1.2	150.1	10.8	1000.2	16.9
1939	2536.5	7461.3				175.2	-18.8	664.8	-2.8	3979.7
2030.8	705.3	1456.8				887.8	11.8	1676.7	91.5	3600.2
1352.2	1894.2	3192.2				1084.2	173.2	1151.8	20.5	3337.9
4311.2	1122.3	1963.2				47.4	41.7	8.9	1274.8	2961.3
2634	-26.8	3388.4				-4.9	76.5	-36.2	1151.2	-35.9
4603.1	391.1	2348.8				-26.9	178.4	15.2	-13.4	6.8
2063.2	-127.5	-2.1				313.2	1148.2	2966.4	-88.7	8.9
3462.2	-14	3154.7				612.4	166	115.2	758.6	1786.4
2.5	1086.5	1676.2				601.4	71.2	1683.2	88.4	837.1
4426.5	2120.1	1				2.9	-41.8	-55.4	160.8	-26.8
1411.2	1036.1	2668.7				-4.1	-9.1	1442.1	-10.3	5.7
1638.7	77.4	1377.6				481.5	-23.8	-20.2	14.2	13.7
-44	2219.7	2791.2				-8.5	-9.9	-14.8	95.3	2097.4
5566.3	1240.5	1577				30.8	-0.2	287	9.1	16.9
3412.8	1331.9	4069.4				-7.5	-13.5	-3.9	252.3	4394.3
929.4	-14.5	4118				520.5	-41.2	1286.4	564.5	0.5
6940	22.5	2242.6				177.6	21.4	1917.3	451.9	29.5
1359.1	1142.8	3218.3					4.6	2135.6	612.2
3318.8	-133.7	-35.2				382.7	-31.4	1648.6	-8.9	40
6514.7	1621.2	575.3				990.3	6.5	-106.1	24.9	1053.8
4023.8	1272.2	127.8				1151.7	10.4	52.8	-10.5	423.7
1728.8	863.4	3105.8				1063.8	-15.7	943.8	-33.1	4.9
2637	-8.6	3065.2				1555.9	-10.3	1503	1078.9	2714.1
6270.7	1553.8	9.2				21.5	-8.5	1525.8	-26.2	-27.6
1330.4	1071.1	6354.4				9.3	82.7	-21.3	26.5	437.3
1436.1	1062.2	10370.6				-25.9	-37.8	-50.4	776.1	-171.2
1910.2	1558.8	1073.8				40.6	9.8	2486.8	2881.8	26.2
1641.8	1089	1454.3				903.2	-1.8	6.1	632.6	2336
2378.8	2834.1	5075.4				172.8	-15.2	5.8	10.6	-28.5
5464.3	927.6	3270.8				17.2	-7	1062.7	10.7	-723.1
1955.5	965	2265.5				1112.8	-15.6	2575.2	-14	1969.4
2311.4	1377.5	2462.3				884.8	4.5	2699.8	-19.6	-58.7
2841.8	10809.8	4591.2				-37.5	32.3	-13.4	1587.8	-81.5
2706.2	2304.9	2987.4				18.8	431.5	1662.6	-61.4	-12.5
4048.7	575.1	3324.4				17.2	218.9	1173.4	81.9	2172.8
4964.9	1367.6	4711.3				326.8		663.8	4.2	821.5
2052.8	1928.6	3084.6				947.6	42.3	1374.2	20.8	43.3
1400.7	1225.2	4657				6.8	18.4	1313.7	427.2	232.7
2312.2	2333.5	954.6				806.2	-26	2434	922.4	28.9
4240.2	240.7	3846.5				1005.4	-17.6	1102.9	859.8	5351
3283	588.8	1803.3				20.2	-34.5	50.2	-17.8	-673.2
1955.8	684	1993				2.3	-9.1	106	14.9	643.8
1143	2453.5	6341.2				43.5	26.9	-106	-82.6	2216.7
2651.7	569.4	8103.5				53.6	22	-67.2	-32	2537.6
2608.2	1032.3	4961.9				647.2	13.2	1589.8	718.8	861
4406.8	-299.2	97.8				3.3	7.8	1590.5	28.3	678
2390.6	-3.2	4433.5				750.7	-13.2	4.9	1378.6	-58.3
1789.8	2023.8	2162.2				-8.2	84.7	26.5	2375.7	2841
-22.6	2573.5	2656.1				29.9	-17.2	31.8	408.2	-28.5
-4.2	1172.4	796.4				664.5	-33.8	476.2	25.2	1762.6
3188.4	1420.1	2578.4				655.1	12.5	1728.1	653.1	2595.8
3199.3	84.5	1217.8				901.7	37.8	1740.8	3.5	1852.7
17.1	5379.9	1738.9				769.5	-20.2	-6.2	-24.9	283.3
2195.8	3470.8	2381.2				-0.4	-14.5	-3	1795	125.5
2539.7	1956.6	3233				-5.5	2	-39.9	798.2	1811.8
-27.8	1511.9	2063.9				56.2	-2.5	837	-17.9	-232.5
1913.3	1043.3	4077.6				35.2	36.5	-36.8	-3.9	3639.5
3611.4	263.1	2876.5				821.7	16.8	459.5	-2.7	-77.3
1087.8	1195.1	2968				832	33	898	-18.2	-55.8
3286.2	371.5	2587.2				602.6	26.5	1885.2	5.8	4847.3
-64.2	2591.2	3671.3				1991.7	6.9	-52.6	22.3	3791.5
2032.1	580.4	3340.2				-17.1	300.8	-39.2	1548.8	39.1
1675.5	3136	10677.6				5.2	11.5	2637.4	1380.7	314.4
2044.6	1295.8	1290.5				2120.9	-42.1	2823.5	-7.8	1875.2
1504.8	2778.2	2723				69.2	1.2	42.1	1017.8	232.5
3381.8	-16	2740.2				-55.8	-6.5	-4.6	1172.5	-127.2
2595.2	3291.6	2785.2				16	19.7	-35.1	1256.8	-170.5
4785.5	2526.7	5695.4				650.3	1.9	-32.8	1269.2	985.2
2451.2	1388.1	2567.5				940.2	-8.5	-26.9	14.5	1181.1
2910.2	30	-183.7				409.5	32.8	1259.5	1066.3	32.8
3024.8	852.4	1796.7				1785.9	-6.7	-21.5	765.5	-17
1648.8	569.5	2950.4				1019.2	-14.5	533.8	0.1	-48.2
2114.4	81.2	1963.4				801.1	24.5	-4.4	39.8	-8.9
2616.8	8582.2	2235.2				911.5	365	5080.4	-10.5	346.2
5500.2	2713.6	6589.2				888.8	10.2	13.8	1081.9	-30.2
2449.7	914	1220				4.8	-22.2	4600.3	890.2	-54.8
8827.6	1784.7	4260.7				1170.9	1	2125.2	1463.6	60.5
2729.3	363.1	3401.7				505	-25.2	2042.9	1159.5	177
2024.7	1528.5	3175.9				11	-11.8	-41.9	2.2	19
1833	951.2	1319.8				316.8	-12.2	1378.2	708.5	1.7
2051.8	4459.5	2042				899.3	43.5	21.4	-1.5	99.9
3.6	4352.5	4160.4				9.9	-18.8	142.2	1626.4	-19.8
25.9	2782.8	2594.6				-4.1	-6.8	77.1	706.4	-20.2
-19.8	1090.2	3575.5				-9.5	112.6	-11.2	791.3	-10.2
3088.9	23.1	1255.4				751.3	1462.2	1175.2	-55.6	66.1
423.5	-6.5	5721.2				387.8	2.7	49.8	1019.8	81.1
2050.7	770.2	1386.6				903	-35.5	103.3	43.2	7.1
2615.2	-97.5	1516.3				994.8	-35.7	1989.4	4.2	-12.1
-14.3	3462.2	2097.2				630.8	-21.2	-22.8	1194.7	1482.9
18.6	1754.1	-4.8				-44.3	17.4	-28.3	-5.6	10.8
6206.6	849.8	3877.5				2358.6	-42.6	1440.1	2027.3	28.9
1101.3	1408.5	2034.8				793.9	45.5	1730.5	714.9	1325.3
4910.3	1066.5	5023.6				680.5	85.6	1079.9	10.1	1317.8
4064.9	-8.2	2876.5				-36.6	-150.9	85.2	1559.3	-17.3
-0.2	5210.8	2411.2				-9.7	-24.4	-89.8	1216.4	-2.6
100.2	774.6	1449.2				-21.5	-8.7	1681.2	466.8	-8.4
9575.8	759.8	925.8				46.3	7.9	-5.2	488.5	13.8
4217.1	2147.6	2454.6				1061.2	-15.5	-105.8	1426.4	97.4
2154	1405.7	3079.8				895.8	-23.1	242.2	3837.4	25.7
1359.9	2337.9	2657.5				402.7	187.8	1918	1247.7	2213.5
-9.5	1610.6	3284.4				748.8	1	7.6	6.7	21
2986.8	54.8	2147.9				-15.3	-15.7	1813.7	1481.8	0.4
2997	1214.5	3475.7				21.8	15.1	-112.6	351.9	8.1
6155.3	966.1	4066.6				708.3	32.1	55.2	-37.4	2.2
3427.5	1117.5	5042.9				-5.3	69	-27.5	693.9	-12.8
3795.9	1075.2	1611.5				41.2	-5.9	-25.5	37.1	11.1
2930	3912.8	4251.7				403.9	41.9	-21.5	-4.7	35.2
1540.3	3361.2	4078.1				404.3	74.5	933.1	1103.9	6.6
2934.1	-713.3	1902.1				11.8	23.9	114.2	426.2	41.7
1949.2	1785.2	1759.2				611.9	26.4	1433.2	583	11.2
4096	1883.1	3875.9				597.8	159.6	1204.1	495.3	-36.5
1062.8	1828.5	2835.8				908.2	142.4	1982.5	1222.3	4.5
5820.5	1086.2	4184.5				951.1	7.8	2712.2	-2.6	4.8
7913.2	1090	2994.5				-48.2	-41.8	-68.2	741.8	1052.3
4989.4	-30.5	2132.6				1884	16.8	744.7	2368.6	-26.4
-20.7	204.9	1278.5				855.3	4.6	974.2	2748.9	1635.5
7128.7	-40.6	1855.5				417.6	-84.8	-1.8	925.5	1057.8
2056.8	4775.7	2497.8				-3.8	35.9	3.5	1054.9	-17
2620	2193.2	2312.5				1210	6.8	-45	-9.7	-18.1
2780.9	1503.5	3868.7				1893.8	-25.6	-22.2	34	1
5479.2	-3.8	2979.3				102.9	34.9	23.7	1459.8	-20.5
1562.3	-73.5	2827.6				554.9	33.2	2228.6	806	1210.7
3089.8	82.6	1660.2				975.5	67.5	30.4	3417.4	429.7
3154.1	776.5	1700.1				847.5	46.9	-10.2	1076.5	2621.5
3827.3	4074.4	2493.6				159.9	50.1	-7.4	2481.3	-4.4
1792.4	172.1	2882.2				1265	11.3	-37.7	329.4	-5.6
4240.4	63.3	9862.9				1100.6	-25.1	2.3	711.9	-8.2
2549.6	2648.6	31.4				1167.5	29.8	248.2	-26.1	82.8
4199.8	1423.8	3131.2				871	-45.5	4233.8	2271.2	1870.5
552.3	476.8	2444.8				-7.8	3	2515.3	1422.1	960.8
2357.8	300.8	2298.2				-10.5	-11.7	3743.2	491.6	13.7
1155.6	826.1	16.8				-49.3	-15.6	-11	1087	978.7
1039.5	3267					795.1	18	54.1	-5	813.4
-552.5	5040.6	-36.6				54.3	-15.8	1621.6	612.1	526.5
5028.7	2885.4	-18.9				1552.4	9.8	35.3	908.7	14.7
5631.5	2940.2	1774.2				424.5	24.8	-52.8	20.3	1133.5
5514.6	1637.4	-4				46.5	-23.5	97.1	-37.5	8.8
-42.2	2163.3	29.7				-3.5	5.9	7.8	855.6	5
35.7	1135.8	-63.8				40.2	15.5	996.5	1088.5	896.5
3431.9	2353.3	3180				32.8	-21.5	1626.9	2514.9	1630.5
	330.4	1824.5				-8.6	-13.5	835.7	48.2	2246.8
31.2	292.8	-64.4				663.2	-34.6	2073.8	1913.2	417.2
1121.5	1422	4976.2				1144.7	37.4	1799	-31	1068
2076.2	15.5	5055				1428	363	-22.8	47.9
2121.8	1800.8	1166				500.3	-3.3	-58.8	-23.2
1108.1	1087.1	3127				207.5	-44.5	78.5	1043.9
913.4	1874.4	2450.4				88.1	32.3	1492.8	1465.2
-9.5	1622	4801.5				-29.8	-37.9	2279.8	18.2
1385.5	-63.9	2782.2				-80.4	17.5	-134.8	3478
1396.2	874.5	1687.6				-27.3	37.5	1906.8	27.2
8.2	-23.5	-10.5				-2.2	9.3	-23	1031.1
938.2	1039	3130.7				2453.3	-30.4	-6.8	1572.5
840.4	1712.5	4196.8				59.8	-17.7	-27.5	1267.4
3664.8	-41.5	3620				-2.5	16.2	1757.8	494.7
1494.8	2796	10415.8				-3.5	-16.8	2296.6	1029.3
1843.4	150.2	2555.3				-6.7	-15.8	2733.4	340.5
1478.9	-17.6	1225.4				21	-9.2	-28	-33.9
47.3	-30	4349.3				-50.9	25.8	2993.2	1148.9
809.7	3363.6	7001.3				-25.4	-45.8	3578.5	899.5
1819.7	416.7	4021.5				103.6	16.5	1549.8	-23.2
15.8	-8.1	2873.1				-2	33.1	-42.1	2394.8
1494	3.2	1640.8				-15.8	10.5	25.4	505.8
1260.7	2587.8	-5.4				26	473.5	-23.5	-12.2
2039.9	2167	-37.6				94.5	18.1	1740.2	98.5
1554.8	-107.8	33.2				-55.9	26.2	-59.5	1562.8
2663.5	-45.8	4.2				3.8	-68.2	938.2	-31.7
6.7	-11.3	19.5				901.8	-17.9	553.3	726.1
1604.7	1421	5275.2				33.5	-13.7	2386	415.4
2849.5	-13.7					1136.2	-1.9	-52.5	-9.1
63.1	1113.1					11.2	40	2592.8	14.8
2392	11.2					7.2	12.2	-42.4	650.1
15.2	1646.2					5.8	26.2	-10.2	-12.8
4.2	-7.8					73.5	36.7	25.8	778.8
13.5	863.5					-70.8	-10.2	0.6	-2.8
923.9	3103.4					72.2	-34.8	20.1	-7.7
1303.6	771.2					413	-19.4	1053.9	5.6
2367.8	675.2					536.1	5.2	-62.7	819.1
-19.8	-105.7					-27.8	97.9	-51.2	-17.2
-1.2	1092.1					17.9	-3.5	22.2	-10.6
1235.8	-46.8					0.8	42.5	1097.4	-20.9
-14.1	4004.5					-4.1	41.2	1771.2	611.9
1460.8	-30.1					8.5	6.8	-1	81
2258.3	4077.2					75.8	-2.1	44.5	-1.1
1840.2	4617.2					-1.7	860.6	116.2	1334.7
20.1	-1703					-34.4	-17.1	42.8	723.3
38.8	-15.2					-23.7	-16.2	357	-53.5
1287.2	896.7					6.3	-17.6	1656.2	40.9
3942.5	50.8					-1.3	-12.1	2240.5	146
2373.1	1957.7					768.9	12.5	-72.2	-2
681.8	28.6					-47.5	-29.8	-29.2	-4.3
1986.5	2000.5					22.6	29.5	-23.1	908.2
1403.1	2586.3					-24.4	-8.5	2655.4	-48.8
951.6	999.2					30.5	40.9	-21.7	8.3
1691.9	661.2					19.1	-23.3	-16.9	40.1
2814.1	67.5					1250.4	14.3	167.8	638.2
1664.8	8.3					10	-39.1	1157.7	-18.2
1780.3	5.2					748.9	24	858.2	5.6
3343.9	2204.7					966.6	70	-16.3	-17.2
1813	3294.5					424.5	8	71.7	-13.8
1139	992.7					32.5	-36	16.2	13.2
1996.8	1769.2					-2.8	544.7	-31.3	-32.1
4311.9	7425.3					266.8	17.8	-45.8	-16.8
1578.4	93.3					-14.6	-22.1	8.2	380.3
2476.2	4377.8					30.8	3.3	3635.8	1263.3
1134.5	-504.6					15.8	-48.6	1272.9	-9.4
1019.8						-17.5	-163.2	1527.9	6.2
3007.6	85.2					13.8	-57.8	1348.8	-34.6
1319.5	437.5					-20.4	-1.4	11.9	1654.8
1355.2	-44.5					11.1	-17.7	5.5	295.1
1165	13.8					207.8	420.3	5067.6	13.8
2024	-26.2					9.5	13.2	-33.2	1277.7
1115.5	507.1					508	37.5	2858.8	489.1
4047.8	1101.1					1433.6	-15.1	32.2	-16.8
1657.8	97.1					17	-25.7	2875.6	585.4
-6.8	632.5					1817.5	-98.7	67.8	472.8
3345.5	1254.2					498	1.5	28.5	746.5
3.9	15					526.9	113.2	32.8	1031.1
2237.9	732.9					2.2	-50.9	12.5	910.1
2	597.4					1639	-18.2	896.4	2325
1698.4	-67.2					1205.7		2211.5	-28.9
1958.2	368.8					-26.5	30.4	53.4	422.9
937.1	1161.4					1405.1	754.2	25.5	-48.4
2805.2	1651.4					25.7	8.3	-11.6	1234.9
2630.2	589.6					-27	248.7	1804.8	-7.7
89.6	1082.9					-10.5	0.3	2.5	91.5
3523.2	1520.9					816.5	34.3	-67.9	-12.2
1821.7	374.5					1684.5	22.6	3164.4	407.5
2941.4	969.8					17.2	-3.3	23.5	-61.2
2170.6	1360.4					208.3	9.8	549.7	-10.8
1112.8	1308.6					46.1	13.9	-23.2	326.5
-1.5	758.8					-20.3	47.8	428.1	-70.5
4058.7	1688.2					795.7	310.7	32.2	-43.9
1386.6	1344.4					-11.7	612.9	-11.9	-5.2
-28.2	1262.4					316.7	-27.3	98.1	560.7
69.3	941.6					4.4	30	28.8	63.1
44	4.9					98.3	6.2	2409.5	56.1
2.4	1685.5					12.2	-2.7	2220.2	-3
-11.5	697.8					-55.2	22.5	0.5	1526.6
2187.5	457.9					52.5	8	-9.8	420.7
1960.5	1526.2					-8.3	47.4	-38.5	-26.7
982.1	1096.7					946	37.7	246.5	1317
2160.4	2566					1244.8	-15	-2.8	224.8
1835.3	2295.3					17.6	91.2	10.3	22.9
1965.4	1168.6					403.8	-29.1	2067.1	106.1
1149.2	948.2					-16.5	879.8	-19	-39.2
7206.4	-24.7					14.5	43.7	21.3	-34.6
29.1	1474.5					-22.5	-71.9	18.1	356.1
28	2295.8					5.5	18.9	790.7	826.5
-40.8	-6.4					-24	-18.9	281	-2.3
1524.4	-17.8					-16.5	35.2	958.2	-6.5
598.3	109.3						-118.8	1865	159.6
2078.8	-19.7					25.2	-91.6	1331.5	2061.5
29.2	282.2					141.5	26.3	3.7	6048.2
-27.4	4.4					98.8	1989.2	1	44.8
374.8	11.9					-59.5	520.8	1.8	1132.4
1583.5	10.1					-32	24.5	-36.9	2737.8
2685.8	37.2					17.8	-8.2	-31.2	-17.1
2218.1	2147.9					220.2	220.2	-10.9	67.6
117.8	1845					39.2	77.7	31	-364
126.8	-14.9					-3.6	-28.1	-10.6	-3.7
1.5	1493.5					-40.9	14.7	27.6	-4.2
180.6	32.4					16.2	-109.3	1030.2	17.5
3890.8	5.3					66.1	-138.4	1853.8	3867.8
1398.2	24.4					-15.1	-38.6	63.8	961.3
896.1	-15.2					7.9	27.4	482.5	2316.5
986.8	4.2					39.8	-4.4	-15.9	12.5
15.5	732.6					-38.2	689.3	-25.4	64.8
30.8	-31.2					-4.5	51.6	-46.2	-545
11499.3	3952.9					52.1	-15.2	-13.8	26.6
2158.1	-3.4					23.2	53.5	23.9	36.1
870.2	-30.3					751.7	-20.1	138.1	1099.8
1392.7	1143.3					1578	404.4	42.2	330
1574.2	1112.2					0.2	1544	1946.2	-54.8
2885.7	1978.2					39.5	28.4	14.5	1581.8
3163.9	305.6					1096.9	132.8	-9.8	1626.5
2560.7	2105.7					1149.9	51	-28.1	1347.9
1078.6	39.9					-65.3	1111.2	502.8	786
3409.5	591.2					928.8	253.8	1050	822.7
434.2	-50.5					675.9	596.8	1369.2	73.9
12765.5	5.3					470.7	23.4	-13.5	1625.7
-64.5	-27.7					232	130.5	987	626
2518.2	-118.2					5.5	-176.2	712.1	-19.7
-37.9	1815.5					-76.6	-28	-2	-18.5
1667.3	392.7					-0.5	726.5	-29.1	54.1
1706.4	130.2					848	-31.7	198	711.2
1351	2561.7					-9.5	-56.5	-42.1	-19.6
1849.5	584.6					1182.1	38.4	5.1	759.6
1606.3	2341.9					0.8	1340.9	759.3	219.2
7073.4	2614					-41.8	2114.9	8.8	275.4
877.7	1679.6					-42.5	-243.9	20.5	1336.6
1080.8	1608					1201.7	1141	-55.5	-1.5
5976.7	664.8					61.7	-35.5	580.6	1471.2
4666.2	0.4					0.4	570.5	204.8	738.7
772.2	1617.2					-54.5	-22.8	825.6	471.5
3347.5	109.2					-40.6	22.8	1.8	-34.2
2979.6	-51					365.2	725	2.6	30.1
1137.8	12.6					17.5	69.3	274	1299.2
2073.4	59.3					61.8	-31.5	-23.7	676.2
711.4	1423.3					245.9	8.7	612.5	-5.6
4709.6	1603.6					-23.2	-29.5	-68.1	-21.9
13729.5	1776.8					1292	64.9	-23.7	7.3
1753.5	221.8					1741.7	43.8	-16.3	633.5
5332.2	1643.8					3441.7	-4.2	19.1	901.5
1635	852.5					-37.7	-9.7	-9.1	-43.3
1816.1	1344.5					12.5	6.3	776.7	-15.8
434.3	799					1953.1	-1.3	-37.8	-6.3
2006.8	203.7					28.8	-9.1	1054.2	-29.5
2038.9	-28.8					1761.7	-37.2	-7	1
2371.7	-10.5					13.2		977.9	9.5
-269.2	1291.5					3564.1		-11.2	18.4
2860.4	1980.5					3860.1		-57.2	1206.2
2228	134.4					25.9		5.3	135.4
54.2	890.3					4749.2		1893.6	902.6
2663.2	768.1					-10.8		-14.5	-5.3
2523.7	529.6					707.1		778.1	1.4
6367.8	472.1					1338.1		33.4	476.6
906.5	1034					26.4		15.2	-27.3
2787.7	1438.2					456.6		734.8	801.3
3817.1	-58.3					1697.5		-19.5	499.6
2185.1	17.2					1529.9		894.7	1240.8
1691.7	19.8					6035.5		1717.9	300.5
2741.3	-5.8					1227.8		1753.2	-3.8
3606.3	2173.2					4109.9		504.5	753.6
1450.3	-188.7					1014.6		494.2	-38.1
2421.2	1060.5					1856		1384.8	-4.8
13273.2	712.2					2973.7		612.4	801.8
-35.7	1268.5					643.3		-15.2	375.4
1697	247.1					3199.5		98.3	2048.2
4993.7	711.2					1108.7		15.3	-12.1
4385.8	-15.4					449.6		766.6	1504.8
2246.5	1419.8					2126.1		2891.7	631.8
22.7	1728.5					3011.7		70.5	1061.8
3131.8	-47.1					2088.8		28	481.8
101.8	-18.7					1754.1		14.8	-15.3
9825.5	616.5					-93.9		-31.5	19.4
739.5	850.1					554.6		2776.2	-11.5
88.2	-61.5					1497.9		37.5	301.8
4769.8	-16.4					5672.1		-12.9	503.3
1565.8	753.7					2352		2334.5	3709.5
10177.8	317.1					571.4		21.6	45.7
3271.9	143.9					2467		-24.7	9.3
5379.3	-4.2					1602.5		1659.5	74.9
221.5	54.2					933.4		896.4	16.4
2947.8	4509.8					-37.8		29.5	530.3
-10.5	108.8					1137.8		8	991.8
1898.3	269.6					2987		16.9	-19.5
3864.2	798.8					26.5		865.7	-6.2
1316.1	668.5					-10.9		-64.5	-9.8
2966.2	89.1					-45.8		628.1	21.8
2370.2	5030.1					7.7		-21.5	45.4
2258.3	2391.2					-38.2		7389.8
1272.8	1057.4					1691.2		-50.7	930.7
1509.2	-109.8					-8.9		2168.1	-10.9
1580.5	-26.8					1262.2		-17.8	56.8
1068.3	-289.8					19.2		-53.5	-38.2
696.3	723.9					-33.1		-20.6	-350.8
1292.3	1595.5					1071.6		-0.7	-5.9
2714.6	754.9					885.9		10.9	3193
2013.1	3625.4					146.8		2591.1	32.2
-32.2	1831.2					14.2		1171.7	81.9
-20	1282.5					611.3		-12.1	9.9
3341.6	77.9					399.2		534.4	5852.5
1923.5	1539.5					-15.2		1223	-46.4
48	517.5					3.2		17.5	818.7
331.9	783.2					661.1		1551.6	-1064.7
1688	108.8					458.5		1305	7471
2935.8	426.5					-44.2		-33.7	-6.8
611.4	2385.9							-6.9	-42.2
-21.8	-8							2081.2	2212
2363.3	420.6							-87.8	5.8
2441.9	908.7							1747.3	366.8
4406.1	2474.6							1.2	3.1
47.6	-338.8							-22.6	-2.5
-9.7	3139.3							69.5	598.6
	186.8							318	13.8
7.8	966.8							1483.5	3298.5
1966.4	2958.5							-37.7	-12.2
1516.5	29.7							1418.8	78.3
-9.5	-24.4							4839.9	1331.8
949.2	1444							-22.2	-34.6
1746	6244.4							12.6	1807.4
526.5	924.8							1145.7	99.7
471.5	908.1							1005.8	665.8
1470.2	2383							751	1458.8
2368.7	297.4							-50	-236.1
2063.2	991.5							3418.5	14226.9
22.1	1084.5							1845.5	2663.5
1421.2	538.2							-113.5	-10.1
1173.4	7403.1							66.4	1.2
-196.1	4.2							-10.8	2712.9
1339.4	963.9							-43.5	9.8
2137.9	380.4							2413.3	4221.4
2133.9	555.6							1421.3	668.6
2918.1	-152.4							595.9	13650.7
615.9	7243.3							38.5	-251.2
1912.8	1099.7							-10.9	26.7
2845.2	70.1							1060.1	2359.5
113.2	-1795.2							5402.8	9294.6
2706.7	4376.8							3079.8	65.1
1850.7	3.2							88.3	3227.5
1966.9	27.5							-123.7	19
2092.5	1138.4							-41.4	7800.6
-9.4	2105.6							-33.7	634.1
-83	1720.5							1479.8	758
-6.1	226.8							6880.7	9675.5
1304.6	1094							947.8	4708.3
1729.9	-145.6							1136.6	-37.4
1777.3	2490.9							680.4	5347.7
1022.4	1336.8							3259.9	41.7
3406	4944.2							6354.3	5135
1039.9	6871.1							4.5	-50.3
2348.2	-1.1							3415.2	1018.3
1465.7	4369.8							122.5	9.5
1065.1	5493.2							1566.7	349
674.3	2366.5							3034.8	1284.2
2700.4	812.2							16.5	5404.5
4405.6	977.7							4.2	2623.3
1753	-77							1049.1	2
2745.5	1173.1							3.9	4113.5
1570.6	10831.8							4.8	-24.2
1316.5	597.9							18	1216.2
2990.2	-32.2							-21.2	22
2956.2	-75.1							1386.6	1998.6
1773.9	51.2							1429.2	9045.9
1661.3	17805.8							-348.6	7243.3
1498.5	173.5							-18.2	16653.6
2880.8	29.2							19.1	2799.5
1138.2	13.2							837.2	4.8
2004.8	236.4							1746.7	3980
8.3	9287.8							1237.5	1278.5
41.8	1122.6							1349.6	4732.9
2058.4	3067.5							-4.9	32.8
1943.3	3075.3							68.8	6401.5
1780.2	18.4							3424.7	221.9
1166.2	1282.3							643.4	-173.1
835.5	-5.9							6401.8	33.8
-21.3	983.1							13.6	1442.5
-47.6	524.5							24.2	249.9
2205.2	1609.8							1888.5	7928.2
1327.4	112.5							9.6	5451.7
2532.8	636.5							28.2	790.7
-10.2	-150.7							17.8	134.8
3240.8	-40.2							-19.2	9354.7
1797.7	-27.7							-37.2	182.9
1526.8	2134.3							2585	518.1
1473.3	865.6							498	0.5
4776.1	-8.2							1402.6	906.1
1185.2	763.6							405.8	7341.5
2018.8	-9.5							-13.5	1121.6
2229.8	-5.7							-23.9	1759.2
1197.2	-3.2							2501	1463.7
1235.2	1110.1							-31.5	3719.6
1147.4	851.8							144.6	2046.7
-21.5	107.6							1542.5	-191.7
2388.7	-102.7							1084.2	-67.7
1921	446.2							17.1	1180.2
1023.6	268.9							1985.5	-20.1
1269	-96.7							30.8	53.6
1646.4	1658.4							1785.1	-63.2
2006.3	3657							1050.2	5742
4777	118.2							1029.2	329.6
1140.4	-9							-224.8	1734
840.4	122.6							3915.9	-144.3
3021.8	1.3							584.9	22.9
2290.2	27.5							5.5	3034.8
563.3								13	2422.8
609.4	53.5							891.9	1494.4
1757.9	17.2							1283.1	55.1
2246.7	-2.3							794.3	788.8
2426.5	-10.8							13.8
200.9	28.8							1643.2	128.8
1.8	2062.8							1714.4	-5.8
793.2	-52.4							-23.6	54.4
3104.3	748.5							2609.3	654.1
3026.7	17.8							1643.3	1245.5
3509.8	11.1							-56.8	1199.5
1491.7	1119.5							5.2	1293
-3	1755.6							-29.9	765.5
220	2311.5							582	238.9
-4.8	1083.1							-36.5	1203.2
16.3	1591.8							501	2388.5
1029.7	-37							865.9	4353.1
2281.5	1800.8							-10.3	1063.3
1971.2	1972.8							34.8	2072.9
1232.5	1083.5							-119.8	1073.8
1069.1	877.9							1729.2	856.5
2851.2	-167.9							1882.5	1454.5
1325.8	1147.7							765.2	1427.7
2066.2	340.4							1043.2	838.4
749.3	11.5							-7.1	-7.6
1282.8	19.9							-32.3	1045.8
2417.5	1669.4							66.7	2392.8
163.5	33.8							-29.4	1161.3
-47.1	2122.8							21.5	1612.5
2073.8	722.4							-35.5	674.7
3249.2	1008.9							1144.8	975.8
84.2	1080.6							880	19.3
-15.6	1.8							1235.3	720.8
4456.8	356.2							26.5	1415.3
2921.1	1143							-12.8	1318.5
7015.8	657							5154.8	1849.4
2810.7	-47.2							-26.1	11.3
1931.8	1183.2							7.3	10
41.9	848.5							25.4	1318.4
14.3	891							30.7	-27.5
4439.1	47.2							-0.6	1528.3
3850.1	1250.6							1480.4	848.5
1757.6	678.1							2000	2216
1068.2	1744.5							1604.7	1068.7
3631.2	721.5							3076.1	657.1
2433.8	1166.8							1427.8	938.9
272.3	41.5							121.8	1082.9
2132.7	2891.8							8.7	648.4
6233.6	1092.4							1569.9	180.4
1721.5	1381.2							935.3	664.9
4455.7	-327.3							242.1	762.2
72.5	8.8							532.8	2983.7
-3.8	1081.3							377.8	1547.7
2128	1331.5							589.8	916.9
1262.2	805.8							-15.5	1022
3255.9	-548.4							4163.4	493.2
3226.7	-50.7							6529.1	890.8
2042.8	1727.6							-370.2	-46
-2.2	1777.3							82	1241.3
4204.5	1702							23.9	-36.9
1185.3	-113.6							2877.2	545.2
-16.3	22.6							1623.9	709.8
1306.8	855.5							1882	807.2
41.8	820							969.8	1764.5
-53.6	413							4.1	1723.1
57.7	1113.1							860.7	1676.7
-513.8	1693.8							905.7	1600.7
1.2	161.8							1108.8	-66.1
9279.5	1983.8							1407.5	1583.2
2851.6	2017.7							1388.6	-23.8
3140.2	1246.8							1368	1081.2
-112.6	-10.2							25.9	4922.9
-70	1429.1							1377.7	476.9
33.5	-1134.5							1380.2	1160.2
2096.2	170.4							3435.5	1842.3
29.9	1195.1							3201.8	807.2
3384.2	-10.5							35.8	489.7
2012.8	210.6							513.6	-9.8
4407.3	423.8							-9.5	9.2
1395.2	777.3							37.8	1062.5
1315.1	21.9							1990.2	2195
1522.9	-37.2							2937.8	-7.5
3753.3	34.9							57.1	2099.2
2544.6	1002.1							24.6	-122.5
-0.2	-170.3							2596.6	1898
760	640.2							2135.5	726.8
3590.8	5.9							1017	801.4
2838.1	2009.9							59.9	-0.2
417.2	1528.5							956.8	24.1
107.3	1630.9							1162.5
2284.6	2468.1							362	0.2
-403.8	917							804.9	67.7
1310.6	26.8							1034.5	35.3
58.5	724.4							-11.5	-3.2
22.3	-173.1							924.2	1265.1
5.9	432.1							-47.1	5.5
45.9	718.5							-8.8	807
3037.7	-14.3							2210.5	76.5
-12.3	1198.1							2019.7	2783.6
1395	2005.6							1326.2	-9.4
2081.3	-0.2							269.9	731.9
6.2	19.7							2105.7	30.5
52.8	766.8							610.8	-94.7
-61.3	843.5							1353.8	2231.7
821	821.8							419.9	581.4
-61.8	9.8							1311.5	447.7
1500.2	1092.2							127.5	770.2
29.8	787.2							-42	44.1
-136.5	31.2							1636.8	309.7
-98.5	-60.2							-22.5	-25.7
21.7	1626.2							-49.3	-51.8
3769.5	406.7							1517.9	-19.6
1899.5	45							2777.2	450.1
1722.7	23.6							3070	-1.1
684.7	-37							850.3	-16.4
865.2	1174.4							1325.2	-28.8
3800	540.8							-17.4	153.2
-11.3	4130.4							-3.3	3.5
121.8	-57.6							1591.8	1020.1
1309.2	275.9							8.7	6.1
295.1	2593.2							494.8	619.7
-221.9	-27.6							802.1	-16.1
32.8	916.8							860.8	8.5
2583.1	-9.2							6539.4
270.5	2426.5							1.8	95.2
4300.8	5237							3667.5	13.7
2216.5	-24.3							-473.9	36.8
865	556.2							2855.7	16.5
35.8	1944.5							1925.1	-0.4
4191.2	1187.1							1177.5	128.2
9056.3	94.9							1661.2	42.3
9	-1.1							1734.6	-5
-48.7	-39.5							268.6	-69.2
2614.4	899.3							-2.7	5302.2
2875.5	865.4							14.9	19.8
-646.4	-7.5							381.8	-58.9
30.3	4611.4							1368.2	41.2
2999.8	458.8							806.5	-22.2
1548.8	1103.8							1982.5	772.5
1176.5	-476.3							3950.2	799.5
8060.8	1096.1							-57.6	580.5
2336.7	1383							12.7	1412.2
52.6	-148.8							-7.1	-6.9
47.2	1296.5							-75	-58.9
58.1	-7.1							2163.5	1453.5
1372.6	2589.1							2022.1	318.6
2255.6	-91.5							-33.2	-28.5
7423.5	-34.5							-44.8	1375.9
1454.1	4225.8							3009	-75.7
3283.9	130.8							3	357.3
5022.3	673							1454.8	-59
-64.6	-29.1							5.5	1439.3
1612.3	705.5							4.9	-7.7
5470.3	4041.3							2192.2	-1.8
6010.2	31.6							2716.2	869.5
5383	-33.5							2103.7	25.2
-90.8	919.5							474.5	-14.8
5228.2	29.4							1804.5	595.2
7811.8	1813.2							943.1	-25.5
-9.3	-29.7							1256.8	-43
-68.2	72.2							1082.8	2755.5
73.2	107							-24.5	6.3
3637.8	-7							1267.1	1442.1
-524.8	2836.2							574.8	44.1
7871	50.9							4376.9	4299.2
4268.8	-49.3							-6	1241.2
4599.9	25.2							46.8	-0.5
4046.2	-67.7							3026.6	164.9
4023.4	-30.5							-21.3	-63
3690.2	129.1							4613.2	546.5
79.9	1754.9							2426	158.3
-324.3	1149.2							1370.7	-27.4
2704.7	982.7							1652.4	49.6
110.9	1424.2							1354.5	14.5
-737.9	170.2							1260.2	17.5
2971.8	-751.7							1	-21.3
-802.6	1472.4							3.2	2371.3
8266.5	-39.1							667.2	5
7781.1	-49.4							1954.7	971
-76	2961.8							82.4	683.8
4368.5	491.7							-94	32.8
80.5	1451.3							2029.4	-43.9
11176.6	3129.6							1017.5	-25
7531.5	-13.9							2081.9	106.8
6194.7	1920.1							506.5	340.5
-123	3182.8							-0.5	1157.1
5244.3	-33.8							-45.5	-18.8
4370.8	5.2							1321.8	17.4
5577.4	423.5							2349.3	568.8
3932.4	-31.2							-11.2	-7.3
63.8	-11.1							2014.1	17.8
6018.9	2997.5							8.3	14.9
7072.4	90.3							551.8	-29.8
8148.1	453.8							-6	536.7
2393.8	437.6							415.9	-22.2
-284.5	193.8							58.1	1.5
2538.9	-47.2							-40.2	921.3
20.8	-23.7							49.1
2088.4	22.3							-9.9	41.6
4573.8	1945.9							2081.7	138.2
-129	664.8							2409.5	99.4
1675.1	-28.5							1733.9	-58.2
2339.5	-36.5							21.7	1399.1
9736.1	457.7							360.3	931.2
8410.6	47.7							1804.7	1104.1
6614.8	-634.1							17.4	51.7
-243.2	1942.1							-37.9	-23
6740.7	-13.8							3066.2	99
9241.2	-34.3							1288.5	3086.3
78.6	-2.1							-71.8	-135.9
2858.8	40.9							4039.8	770.5
-330.9	3.5							3089.5	1971.5
-138	1376.8							68.8	765.1
4738.4	3008.8							4095.5	-198.2
6676.4	1322.3							2074.3	-38.7
5270	-38.5							-11.4	56.5
8864.9	-1.9							3994.2
-104.5	-48.8							1740.3	4088.9
3599.8	5.2							924.7	-40.6
3.5	2318.2							-8.2	11.7
21.2	-32							43.6	605.8
4237.3	1805.2							152.5	45.1
254.4	111.1							-10	144.9
3292.5	6.4							1887.5	774.3
1067	1303							1585	-194
730	483.2							-35.8	34
708.5	403.8							2764.2	-15.3
1914.3	32.2							-56.8	-15.1
53.5	1392.1							1557.2	798.5
59.5	30.1							1838.4	836.6
572.5	484.5							5.2	277.8
2397.6	668.3							443	457.8
2556.2	-13.5							678	-68
-8.7	1315.5							2462.2	3377.4
-130.2	688.5							36.1	-9.6
2993.9	-41.5							-37.8	1763
0.1	50.2							1683.5	523.4
808.4	-8.2							970.8	1049.2
-71.9	-126.2							1816.8	1309.9
140.6	1067.4							2365.2	-5.8
2683	1343.7							792.9	-16.2
3741.7	-61.1							6.1	403.4
-26.7	143.2							-21.1	14.9
69.9	4340.6							851.7	-12.5
1605.6	-58.1							5085.9	492.8
3744	-123.3							2068.9	11.6
708.5	-94.4							-6.1	1764.7
2018.6	1713							1	4.1
676.1	-249.8							3119.4	-12.2
-31.8	-64.6							3320	-25
5259.6	1499.5							726.5	2758.2
1745.6	1203.1							2359.8	111.9
2842.1	69.8							2448.7	484.1
725.1	616.8							1313.2	-8.8
64.5	5674.1							4.1	-19.2
-110.2	3448							-4.5
2496.5	10282.5							3159.4	656
2076.6	34.5							2005.6	145.7
	-60.3							1295.4	776.6
24.6	-641.8							-6.8	775.2
957	3558.9							1057.6	1330.7
3034.4	199.3							2075.7	904.8
5.2	8102.6							-65.8	470.9
4312.2	-250.4							2350.4	1636.1
215.8	2567.6							3006.2	35.2
-18.6	141.6							3352.3	8.9
-24.6	2753.2							5715.8	44.5
2657.2	76.3							1.5	98.8
2549	14.4							1206.3	51.4
4381.2	345.4							4.5	-24.5
3995	1361.9							-77.5	5.8
2518.4	5348.8							1186.8
2866.4	-110.4							4.2
36.9	84.5							1030.5
9.8	6.3							63.8
4269.8	140.4							3029.4
3375.3	684.5							4214.8
3963.2	349.8							28.4
-99.5	18.1							28.8
2656.4	27.5							-7.1
4021.2	-74.9							867.3
19.2	55.8							-2
4180.4	-24.2							74.8
5094.6	-21.4							2919.4
2692.5	-1362.7							-61.8
109.9	-303.4							644.2
-50.4	5526.3							2037.8
1669.8	2223							57.6
3324.7	3760.5							1962.7
-20.1	3187							7.9
29.2	-36.8							14.7
3857.5	2195.2							2298.7
2740.8	7283.5							-1.9
-38.8	575.5							-11.1
2198.2	30.3							0.9
2823.2	1207.6							26.8
2225.2	-533.3							-10.4
3005.1	1417.3							9.7
2018.5	19.8							382.8
0.9	8.8							2178.6
2474.5	6803							1560.6
3279.9	3627.8							-36.8
19.2	5678.5							109.9
2065.8	2741.5							2289.5
3768.4	754.6							7.2
3478.8	5626.5							2.2
3350.5	2009.6							1194.2
2090.2	3966.5							1541.8
1704.6	8343.6							-23.2
1546.2	-41.2							2149
-31.2	4762.3							2037.7
3976.2	362.9							2024.5
2313.2	497.8							-3.4
2181	2860							39.8
2738	5956.2							11.4
4080.5	-43.1							-4.7
2374.2	1217.3							-33.8
3107.7	40.5							492.2
3276.8	5683.1							4.2
2253.6	4093.5							2858.7
3406.8	231.8							-80.2
220.4	28.5							4159.7
2559.7	-72.3							807.5
1216.5	251.5							35.5
4446	4824.2							2032.8
1705.8	3252.5							1190.2
2130.3	1046.5							28.2
3293.2	95.5							-37.5
2744.8	650.2							-29.8
-2.4	2623.2							3388.9
2361.3	8865.2							979.7
3142.1	-103.4							1835.7
2716.5	11.9							47.4
3323	-81.5							1191.2
2329.2	3239.2							1037.4
1427.9	1268.8							-49.9
2327.3	-271.1							-25.7
3309.3	4082.5							1496.3
6890.3	5.2							-3.8
3275.9	304.6							-15.8
2883.3	4.1							4835.2
2232.5	-25.2							-16.8
1735.8	-31.6							14.2
2301.3	-47.2							55.9
3413.4	45.2							1850.5
3132.7	-49							1626.8
4028.2	-50.8							29.4
3089.8	-12.3							7.1
2263.1	695.3							9.8
2547.8	-46.6							301.9
-4.5	3346.7							1128.1
3756.9	253.8							-1.5
2660.9	1446.2							263.9
2842.5	5368.6							1046.8
55.5	374.5							3364.8
3078.8	995.7							2642
2962.8	715.2							-48.3
2506.3	1436.2							182.8
2535.1	3310.9							1021
56.5	837.2							1070.5
2954.2	-15.8							2034.1
2096.2	-2.5							76.1
2802.2	962.9							61.2
6068.5	823.2							-10.7
7607.3	-66.2							7.6
2954.5	2553.3							18.7
5598.8	-61.1							668.5
6025.6	1275.2							782.7
5455.3	163.6							23.9
2907.1	31.7							-12.9
4308.5	1006.2							3942.7
3640.7	-204.5							2869.9
2498.6	991.2							2328.8
-56.5	16.8							2405.5
4113.2	928.3							69
3552	-38.8							-28.5
5118.5	21.6							115.9
2151.5	-13.4							2052.6
2916.9	215.3							2624.6
2146.5	96.6							-6.2
3263.1	809.3							2214.7
4193.8	397.5							-13.4
45.5	28							-19.1
-26.5	2808							814.6
4058.7	363.2							666.6
2667.9	-219.4							-29.6
2882.9	24.4							1932.4
	36.2							1224.6
-33.6	-764.7							641.3
41.7	-47.1							2462.2
-21	1204.1							2695.1
-17.9	18.7							1277.5
-50	-15.8							2562.1
8	-61.5							41.7
-14.7	20.5							-9.3
4348.4	-56.5							2.4
9.5	10.5							3
40.6								-5.8
82.5	-19.1							381.5
50.3	51.1							3029.1
49.4	-17.2							791.9
10.4	54.7							-67.1
2245.2	1572.5							7.1
-3.9	2137.1							-4.4
41.9	1475.1							-24.4
2734.5	1988.1							527.8
8.3	-9.7							2909.8
7260	-103.7							1547.3
-45	1918							495.1
12.2	2360.8							847
3217.2	1316.8							1642.4
5262.3	-172.2							1377.6
13.4	-44.3							-14.7
-42.4	1602.4							11.3
4677	679.2							3783.2
4114.8	2421.6							82.2
3399.2	3333.6							1538.2
8186.5	27.5							1059.9
2710.4	1689.7							1548
8129.2	1484.6							604.8
2274.1	1280.4							2684.4
-76.3	-80.5							640.5
2	1060.2							1610.3
2377.5	2662.9							70
2188.6	-358.9							-0.8
3795.1	948.8							-32
2317.8	-44.5							23.9
2479	1839.2							9.2
1724.8	-5							2367.5
1844	1549.2							-35.1
2300.2	-37.4							1337.2
2739.6	1511.6							1209.8
66.8	1054.9							2965.5
2941.5	1719.5							11.5
4088.2	871.9							47.3
5367.4	1416.1							1991.7
24.3	1786.8							3388.2
4211.2	2018.5							2213.2
3108.5	-14.6							-12.2
2208.2	2.2							21.5
6276.7	2359.6							2.8
2296.2	-30.2							-2
8.7	2628.2							20.7
8992.2	45.2							-22.7
1954.4	12.2							2219.1
1265.8	-34.3							3448.3
5569	1497.1							127.9
3873.8	2019.2							3005.9
746.8	1580.3							5805.1
32	-10.8							350.9
2703.8	-24.9							-13.3
1650.8	1986.7							-61.2
3539.9	4809.9							528.7
21.5	1126							2643.9
2135.4	1259.4							2786.7
368.3	2003.5							2197.5
3493.2	1667.6							851.6
-0.8	1103.1							-21.2
1921	1025.5							-10.9
2552.8	1748.5							2210.8
1634.8	3121.3							1954.5
2248.4	1150.5							2144.4
3055.8	1902.5							1689.7
4708.8	1158							1561.5
-76.6	1311.6							2462.4
5195.2	2208.8							10.5
1880.3	1475.5							5.1
1433.5	2045							-1.8
6	5.2							24
7293.6	-24.2							550.5
-94.7	1835.8							-33.7
3168.9	1390.6							1194.8
6113.1	2496.7							2060.2
3760.5	57.5							1099.8
3011.2	-16.6							-68.9
13.2	1442.6							-11.2
10.3	1345.1							26.4
2481.5	1517.8							26.8
11331.8	1332.7							3.2
7905.8	1939.4							-5.2
10549.2	6796.2							6.2
3861	1414.6							704.7
4549.1	1514.1							929
-94.3	2044.7							2326.3
-40.5	544.8							2184.8
-17.1	1947.8							-6.2
69.3	2143.5							23.5
3838.3	112							-11.6
3719.3	1917.4							-9.3
3021.5	2066.7							11.3
2113.7	19.1							-4.1
5686.1	1650.8							-27.1
-24.9	1181.4							-0.4
1509.9	1710.6							80.1
9.4	1503.6							1624.8
4074.2	667.8							2231.1
2553.2	1468.5							1817.8
8000.2	-90.4							1339.5
45.4	1216.6							46.3
30	484.4							2550.7
51.1	2296.2							-9.9
3325.4	1513.5							1767.5
4742.5	1238.4							-31.4
1074	1866.5							6.5
-43.8	2261.8							-13.9
145.5	3583.5							3315.5
4813.1	1485.5							-48.5
169.1	4265.6							2381.1
-62.2	-7.8							308.9
-5.8	1733.7							1405.8
1616.3	1283.8							1722.2
1944.4	2085.2							40.5
4367.8	1535.3							20.1
5519.8	4048.8							-68
4868.9	1071.8							1422.2
18105.5	-36.8							-49.5
24.5	1277.2							1861.3
-74.2	2836.1							8.2
-29.8	1734.6							49.1
32.4	1812.2							-33.1
27.6	-18.4							-17.8
8017.6	2534.7							3853.5
2357.9	-13.4							3341.6
12.1	3179.4							19.1
-0.3	1952.8							21.2
-67.8	-21.8							-38.5
11600.5	3293.6							862.8
1458.1	1185.5							2857.1
1865.1	760.8							73.6
5886.5	4397.5							2259.9
5193	1524							-15.9
-92.8	3.5							2758.8
-69.3								45.9
5734.9	-16.3							93.3
2570.5	0.9							3782.6
4446.5	-0.8							1550.2
4708.2	-40.6							2815
2841.1	42.9							2282.6
-30.2	48.4							-28.8
10568.1	-5.8							-12
62.6	-39.6							1919.9
2361.8	0.1							1586.4
4320.9	9.7							-0.1
-178.2	34.8							1976.3
7415.3	21.1							-2.8
6877.2	27.2							438.3
1169.9	21.8							-10.3
7538.3	-26.8							2133.3
6133.4	13.4							-27.4
1915.2	-46.4							1768.5
2731.8	5.5							2680.2
-34.2	-18							1640.2
3928.5	-15.8							-0.8
-26.5	67							-32.2
3825.4	1.8							3022.6
3471.2	1080							3145.7
5449.9	-80.5							2432.6
6738.6	732.4							38.5
4468.2	-26							-32.7
3738.6	41.8							3566.6
4112.3	30.9							2646.7
8167.4	88.6							2584.4
4905.5	-5.8							2082.8
10365.4	293							-4
4825	1817.2							2374.1
4822.1	868.4							3297.1
12147.4	3024.8							27.5
9084.5	-189.7							-0.7
1380.5	1207.5							1407.2
5055.5	-8.2							1893.7
[truncated: 2,691 more rows]
